# Supplementary material for: A binary interaction map between turnip mosaic virus and Arabidopsis thaliana proteomes
Source: Commun Biol. 2023 Jan 11;6:28. doi: 10.1038/s42003-023-04427-8 (PMC9834402; doi:10.1038/s42003-023-04427-8)
Supplement: Supplementary file 4 — Supplementary Data 1 [file 42003_2023_4427_MOESM4_ESM.xlsx]

## Sheet: summary
Viral protein	Host protein
HCPro	AT4G22740
HCPro	AT3G58160
HCPro	AT3G55660
HCPro	AT1G04470
HCPro	AT2G40640
HCPro	AT5G08690
HCPro	AT1G69040
HCPro	AT3G21200
HCPro	AT1G30070
HCPro	AT4G29350
P3	AT3G51840
P3	AT5G17170
P3	AT3G10840
P3	AT3G61430
P3	AT1G27290
P3	AT3G62970
P3	AT2G20920
P3	AT2G41410
P3	AT2G34420
P3NPIPO	AT2G17360
P3NPIPO	AT1G01620
P3NPIPO	AT4G39860
P3NPIPO	ATCG00490
P3NPIPO	AT4G04210
P3NPIPO	AT5G10450
P3NPIPO	AT1G04250
P3NPIPO	AT1G42970
P3NPIPO	AT5G35320
P3NPIPO	AT5G21090
P3NPIPO	AT2G17390
P3NPIPO	AT4G34000
P3NPIPO	AT4G20260
6K1	AT5G26360
6K1	AT5G26710
6K1	AT5G37800
6K1	AT2G37040
CI	AT3G02970
CI	AT5G06860
CI	AT3G05700
CI	AT1G20100
CI	AT5G06340
CI	AT2G35680
CI	AT4G15780
CI	AT3G09770
CI	AT2G04700
CI	AT1G23040
CI	AT4G01310
CI	AT5G06043
CI	AT2G23070
CI	AT4G02530
CI	AT4G39710
CI	AT3G06520
CI	AT5G03870
CI	AT4G25100
CI	AT5G55230
CI	AT1G26761
CI	AT3G29075
CI	AT5G11450
CI	AT1G68730
CI	AT3G15640
CI	AT5G59550
CI	AT3G27090
CI	AT4G01840
CI	AT2G32840
CI	AT3G36659
CI	AT5G51110
CI	AT1G31817
CI	AT5G64510
CI	AT5G24810
CI	AT1G13990
CI	AT5G16710
CI	AT2G24100
CI	AT3G55646
CI	AT2G05840
CI	AT2G43880
CI	AT1G14150
CI	AT4G28610
CI	AT1G54210
CI	AT5G37740
CI	AT4G36980
CI	AT4G22740
CI	AT4G30260
CI	AT3G21140
CI	AT1G19660
CI	AT2G25730
CI	AT5G40760
CI	AT1G15810
CI	AT4G03520
CI	AT1G30070
CI	AT3G46580
6K2	AT4G27040
6K2	AT4G30190
6K2	AT2G20920
6K2	AT5G06130
6K2	AT1G62520
6K2	AT5G52440
6K2	AT1G11890
6K2	AT3G10840
6K2	AT1G25230
6K2	AT1G04340
6K2	AT3G07100
VPg	AT5G42340
VPg	AT3G54090
VPg	AT5G48160
VPg	AT1G65470
VPg	AT3G46580
VPg	AT5G15140
VPg	AT3G21295
VPg	AT5G18200
VPg	AT5G35620
VPg	AT4G24190
VPg	AT5G16710
VPg	AT1G11125
VPg	AT5G02470
VPg	AT1G72160
VPg	AT4G23750
VPg	AT1G44160
VPg	AT3G07780
VPg	AT5G61790
VPg	AT3G57050
VPg	AT5G56900
VPg	AT3G58160
VPg	AT1G22640
VPg	AT3G04880
VPg	AT4G39960
VPg	AT3G55605
VPg	AT1G16710
VPg	AT3G04360
VPg	AT5G39400
VPg	AT3G22420
VPg	AT5G60340
VPg	AT4G14385
VPg	AT2G35120
VPg	AT5G27330
VPg	AT4G34110
VPg	AT2G23350
VPg	AT1G49760
VPg	AT4G18040
VPg	AT3G60240
VPg	AT5G57870
VPg	AT2G24050
VPg	AT1G14740
VPg	AT3G63500
VPg	AT3G58470
NIaPro	AT4G27160
NIaPro	AT3G14990
NIaPro	AT5G45390
NIaPro	AT1G11125
NIb	AT1G01610
NIb	AT1G03600
NIb	AT1G03610
NIb	AT1G05060
NIb	AT1G06290
NIb	AT1G07110
NIb	AT1G08970
NIb	AT1G09620
NIb	AT1G11430
NIb	AT1G11770
NIb	AT1G13170
NIb	AT1G13440
NIb	AT1G14150
NIb	AT1G15480
NIb	AT1G15550
NIb	AT1G15950
NIb	AT1G17745
NIb	AT1G18640
NIb	AT1G20100
NIb	AT1G20225
NIb	AT1G20410
NIb	AT1G21440
NIb	AT1G22410
NIb	AT1G22770
NIb	AT1G23750
NIb	AT1G25280
NIb	AT1G25420
NIb	AT1G26160
NIb	AT1G26630
NIb	AT1G26960
NIb	AT1G27385
NIb	AT1G28520
NIb	AT1G29900
NIb	AT1G30070
NIb	AT1G31050
NIb	AT1G32060
NIb	AT1G32520
NIb	AT1G34000
NIb	AT1G48450
NIb	AT1G49430
NIb	AT1G49760
NIb	AT1G50250
NIb	AT1G50480
NIb	AT1G51170
NIb	AT1G51980
NIb	AT1G52520
NIb	AT1G54610
NIb	AT1G54630
NIb	AT1G56280
NIb	AT1G56650
NIb	AT1G58235
NIb	AT1G60070
NIb	AT1G60610
NIb	AT1G62710
NIb	AT1G63940
NIb	AT1G64280
NIb	AT1G64850
NIb	AT1G65150
NIb	AT1G65260
NIb	AT1G66150
NIb	AT1G67930
NIb	AT1G68610
NIb	AT1G69295
NIb	AT1G70370
NIb	AT1G70760
NIb	AT1G72370
NIb	AT1G73060
NIb	AT1G73490
NIb	AT1G74370
NIb	AT1G74470
NIb	AT1G74880
NIb	AT1G75630
NIb	AT1G77080
NIb	AT1G78995
NIb	AT1G79530
NIb	AT1G79690
NIb	AT1G80620
NIb	AT2G02990
NIb	AT2G03420
NIb	AT2G04280
NIb	AT2G04700
NIb	AT2G04780
NIb	AT2G07787
NIb	AT2G13360
NIb	AT2G17980
NIb	AT2G18470
NIb	AT2G19050
NIb	AT2G20300
NIb	AT2G20360
NIb	AT2G21240
NIb	AT2G21850
NIb	AT2G21960
NIb	AT2G23350
NIb	AT2G27200
NIb	AT2G27860
NIb	AT2G28790
NIb	AT2G30750
NIb	AT2G32990
NIb	AT2G37060
NIb	AT2G39090
NIb	AT2G39800
NIb	AT2G40090
NIb	AT2G41600
NIb	AT2G43090
NIb	AT2G43230
NIb	AT2G43370
NIb	AT2G43590
NIb	AT2G44230
NIb	AT2G44560
NIb	AT2G44650
NIb	AT2G45660
NIb	AT2G46535
NIb	AT2G48160
NIb	AT3G01085
NIb	AT3G02070
NIb	AT3G02360
NIb	AT3G04120
NIb	AT3G04700
NIb	AT3G05680
NIb	AT3G07630
NIb	AT3G09440
NIb	AT3G09820
NIb	AT3G10730
NIb	AT3G11830
NIb	AT3G12710
NIb	AT3G12780
NIb	AT3G12930
NIb	AT3G13330
NIb	AT3G13490
NIb	AT3G14080
NIb	AT3G15190
NIb	AT3G15640
NIb	AT3G18710
NIb	AT3G19220
NIb	AT3G20290
NIb	AT3G22425
NIb	AT3G24040
NIb	AT3G24180
NIb	AT3G25495
NIb	AT3G26000
NIb	AT3G27430
NIb	AT3G28180
NIb	AT3G29575
NIb	AT3G44110
NIb	AT3G44620
NIb	AT3G44820
NIb	AT3G45050
NIb	AT3G51260
NIb	AT3G52360
NIb	AT3G52600
NIb	AT3G54210
NIb	AT3G54826
NIb	AT3G55646
NIb	AT3G57870
NIb	AT3G58030
NIb	AT3G58610
NIb	AT3G58730
NIb	AT3G59380
NIb	AT3G59940
NIb	AT3G61680
NIb	AT4G02440
NIb	AT4G02480
NIb	AT4G02590
NIb	AT4G03200
NIb	AT4G08170
NIb	AT4G09460
NIb	AT4G12060
NIb	AT4G13830
NIb	AT4G15530
NIb	AT4G16360
NIb	AT4G16420
NIb	AT4G17730
NIb	AT4G17770
NIb	AT4G18740
NIb	AT4G19120
NIb	AT4G21090
NIb	AT4G22930
NIb	AT4G26370
NIb	AT4G28610
NIb	AT4G29810
NIb	AT4G30000
NIb	AT4G32530
NIb	AT4G32915
NIb	AT4G32940
NIb	AT4G33300
NIb	AT4G33520
NIb	AT4G34110
NIb	AT4G34480
NIb	AT4G36195
NIb	AT4G36360
NIb	AT4G37250
NIb	AT4G37310
NIb	AT4G37980
NIb	AT4G38225
NIb	AT4G38510
NIb	AT5G01920
NIb	AT5G02020
NIb	AT5G03370
NIb	AT5G06000
NIb	AT5G08660
NIb	AT5G09320
NIb	AT5G09650
NIb	AT5G09800
NIb	AT5G13390
NIb	AT5G14050
NIb	AT5G14760
NIb	AT5G15470
NIb	AT5G15760
NIb	AT5G17770
NIb	AT5G18110
NIb	AT5G19370
NIb	AT5G20150
NIb	AT5G20200
NIb	AT5G20720
NIb	AT5G21150
NIb	AT5G23120
NIb	AT5G23450
NIb	AT5G25190
NIb	AT5G26670
NIb	AT5G36170
NIb	AT5G40760
NIb	AT5G40770
NIb	AT5G42000
NIb	AT5G42470
NIb	AT5G42620
NIb	AT5G43940
NIb	AT5G44720
NIb	AT5G45020
NIb	AT5G45040
NIb	AT5G47530
NIb	AT5G47750
NIb	AT5G48330
NIb	AT5G50570
NIb	AT5G51110
NIb	AT5G52970
NIb	AT5G55170
NIb	AT5G56760
NIb	AT5G58530
NIb	AT5G58800
NIb	AT5G59080
NIb	AT5G60160
NIb	AT5G60600
NIb	AT5G62790
NIb	AT5G63310
NIb	AT5G63400
NIb	AT5G64460
NIb	AT5G65210
NIb	AT5G65720
NIb	AT5G66120
NIb	ATCG00800
NIb	ATCG01100

## Sheet: HCPro
viral	host	funtion			BiFC positive
HCPro	AT4G22740.2	glycine-rich protein
HCPro	AT3G58160.1	MYA3
HCPro	AT3G55660.1	ROPGEF6
HCPro	AT1G04470.1	hypothetical, DUF810
HCPro	AT2G40640.1	RING/U-box superfamily protein
HCPro	AT5G08690.1	ATP synthase alpha/beta family protein
HCPro	AT1G69040.2	ACR4
HCPro	AT3G21200.1	PGR7
HCPro	AT1G30070.1	SGS domain-containing protein			Yes
HCPro	AT4G29350.1	PFN2

## Sheet: P3
viral	host	funtion				BiFC positive
P3	AT3G51840.1	ACX4					membrane
P3	AT5G17170.1	ENH1					membrane
P3	AT3G10840.1	alpha/beta-Hydrolases superfamily protein					membrane
P3	AT3G61430.1	PIP1A					membrane
P3	AT1G27290.1	transmembrane protein					membrane
P3	AT3G62970.1	C3HC4-type RING finger family protein					membrane
P3	AT2G20920.1	chaperone					membrane
P3	AT2G41410.1	Calcium-binding EF-hand family protein				Yes	membrane
P3	AT2G34420.1	LHB1B2, LHCB1.5 | photosystem II light harvesting					membrane

## Sheet: P3NPIPO
viral	host	funtion					BiFC positive
P3NPIPO	AT2G17360.1	Ribosomal protein S4 (RPS4A) family protein						membrane
P3NPIPO	AT1G01620.1	PIP1C						membrane
P3NPIPO	AT4G39860.2	hematological/neurological-like protein						membrane
P3NPIPO	ATCG00490.1	RBCL | ribulose-bisphosphate carboxylases						membrane
P3NPIPO	AT4G04210.1	PUX4 | plant UBX domain containing protein 4						membrane
P3NPIPO	AT5G10450.2	GRF6, AFT1, 14-3-3lambda | G-box regulating factor 6						membrane
P3NPIPO	AT1G04250.1	AXR3						membrane
P3NPIPO	AT1G42970.1	GAPB | glyceraldehyde-3-phosphate dehydrogenase B						membrane
P3NPIPO	AT5G35320.1	DBH-like monooxygenase						membrane
P3NPIPO	AT5G21090.1	Leucine-rich repeat						membrane
P3NPIPO	AT2G17390.1	AKR2B					Yes	membrane
P3NPIPO	AT4G34000.1	ABF3						membrane
P3NPIPO	AT4G20260	Cation-binding proein PCaP1						membrane	curated from literature

## Sheet: 6K1
viral	host	funtion			BiFC positive
6K1	AT5G26360.1	TCP-1/cpn60
6K1	AT5G26710.1	Glutamyl/glutaminyl-tRNA synthetase
6K1	AT5G37800.1	RHD SIX-LIKE 1
6K1	AT2G37040.1	PAL1			Yes

## Sheet: CI
viral	host	funtion				BiFC positive
CI	AT3G02970.1	EXL6
CI	AT5G06860.1	PGIP1
CI	AT3G05700.1	Drought-responsive family protein
CI	AT1G20100.1	DNA ligase
CI	AT5G06340.1	NUDX27
CI	AT2G35680.1	Phosphotyrosine protein phosphatases
CI	AT4G15780.1	VAMP724
CI	AT3G09770.2	RING/U-box superfamily protein
CI	AT2G04700.1	ferredoxin thioredoxin reductase catalytic beta chain family protein
CI	AT1G23040.1	hydroxyproline-rich glycoprotein family protein
CI	AT4G01310.1	Ribosomal L5P family protein
CI	AT5G06043.1	hypothetical
CI	AT2G23070.1	Protein kinase superfamily protein
CI	AT4G02530.1	chloroplast thylakoid lumen protein
CI	AT4G39710.1	FK506-binding protein 16-2
CI	AT3G06520.1	agenet domain-containing protein
CI	AT5G03870.1	Glutaredoxin family protein
CI	AT4G25100.2	Fe superoxide dismutase 1
CI	AT5G55230.2	MAP65-1
CI	AT1G26761.1	Arabinanase/levansucrase/invertase
CI	AT3G29075.1	glycine-rich protein
CI	AT5G11450.1	PsbP
CI	AT1G68730.1	Zim17-type zinc finger protein
CI	AT3G15640.1	Rubredoxin-like superfamily protein				Yes
CI	AT5G59550.1	zinc finger
CI	AT3G27090.1	DCD
CI	AT4G01840.1	TPK5
CI	AT2G32840.1	proline-rich family protein
CI	AT3G36659.1	pectin methylesterase inhibitor superfamily protein
CI	AT5G51110.1	Transcriptional coactivator
CI	AT1G31817.1	NFD3
CI	AT5G64510.1	TIN1
CI	AT5G24810.1	ABC1 family protein
CI	AT1G13990.1	AT1G13990.1
CI	AT5G16710.1	DHAR3				Yes
CI	AT2G24100.1	ASG1
CI	AT3G55646.1	TPRXL
CI	AT2G05840.2	PAA2
CI	AT2G43880.1	Pectin lyase-like superfamily protein
CI	AT1G14150.1	PQL1
CI	AT4G28610.1	PHR1
CI	AT1G54210.1	APG12
CI	AT5G37740.1	Calcium-dependent lipid-binding (CaLB domain) family				Yes
CI	AT4G36980.2	CLK4-associating serine/arginine-rich protein
CI	AT4G22740.2	glycine-rich protein
CI	AT4G30260.1	Integral membrane Yip1 family protein
CI	AT3G21140.1	Pyridoxamine 5'-phosphate oxidase family
CI	AT1G19660.2	Wound-responsive family protein
CI	AT2G25730.2	zinc finger FYVE domain protein
CI	AT5G40760.1	G6PD6
CI	AT1G15810.1	S15/NS
CI	AT4G03520.1	ATHM2
CI	AT1G30070.1	SGS domain-containing protein				Yes
CI	AT3G46580.1	ATMBD5				Yes

## Sheet: 6K2
viral	host	funtion				BiFC positive
6K2	AT4G27040.4	VPS22				Yes	membrane
6K2	AT4G30190.1	AHA2					membrane
6K2	AT2G20920.1	chaperone					membrane
6K2	AT5G06130.2	dnaJ-related					membrane
6K2	AT1G62520.1	glycoprotein					membrane
6K2	AT5G52440.1	HCF106 | Bacterial sec-independent translocation					membrane
6K2	AT1G11890.1	SEC22					membrane
6K2	AT3G10840.1	alpha/beta-Hydrolases superfamily protein					membrane
6K2	AT1G25230.1	Calcineurin-like metallo-phosphoesterase					membrane
6K2	AT1G04340	HR-like lesion-inducing protein				Yes	membrane
6K2	AT3G07100	Sec24a					membrane	curated from literature

## Sheet: VPg
viral	host	funtion				BiFC positive
VPg	AT5G42340.1	PUB15
VPg	AT3G54090.1	FLN1
VPg	AT5G48160.2	OBE2
VPg	AT1G65470.2	FAS1
VPg	AT3G46580.1	MBD05				Yes
VPg	AT5G15140.1	Galactose mutarotase-like
VPg	AT3G21295.1	Tudor/PWWP/MBT
VPg	AT5G18200.1	UTP:galactose-1-phosphate uridylyltransferases
VPg	AT5G35620.1	eIFiso4E				Yes
VPg	AT4G24190.1	AtHsp90-7
VPg	AT5G16710.1	DHAR3				Yes
VPg	AT1G11125.1	hypothetical				Yes
VPg	AT5G02470.2	DPA				Yes
VPg	AT1G72160.1	Sec14p-like phosphatidylinositol transfer family
VPg	AT4G23750.1	CRF2				Yes
VPg	AT1G44160.1	HSP40
VPg	AT3G07780.1	OBE1
VPg	AT5G61790.1	calnexin 1
VPg	AT3G57050.1	cystathionine beta-lyase
VPg	AT5G56900.2	CwfJ-like family protein
VPg	AT3G58160.1	ATMYOS3
VPg	AT1G22640.1	ATMYB3
VPg	AT3G04880.1	DRT102
VPg	AT4G39960.1	Hsp40
VPg	AT3G55605.1	Mitochondrial glycoprotein family protein
VPg	AT1G16710.2	HAC12
VPg	AT3G04360.1	Calcium-dependent lipid-binding
VPg	AT5G39400.1	ATPTEN1
VPg	AT3G22420.1	WNK2
VPg	AT5G60340.1	P-loop containing nucleoside triphosphate
VPg	AT4G14385.1	histone acetyltransferase subunit NuA4-domain protein
VPg	AT2G35120.1	Single hybrid motif superfamily protein
VPg	AT5G27330.1	Prefoldin chaperone subunit family protein
VPg	AT4G34110	PAB2					curated from literature
VPg	AT2G23350	PAB4					curated from literature
VPg	AT1G49760	PAB8					curated from literature
VPg	AT4G18040	EIF4E1, CUM1					curated from literature
VPg	AT3G60240	﻿EIF4G, CUM2					curated from literature
VPg	AT5G57870	EIFISO4G1					curated from literature
VPg	AT2G24050	EIFISO4G2					curated from literature
VPg	AT1G14740	OBE3					curated from literature
VPg	AT3G63500	OBE4					curated from literature
VPg	AT3G58470	eEF1A					curated from literature

## Sheet: NIaPro
viral	host	funtion			BiFC positive
NIaPro	AT4G27160.1	SESA3
NIaPro	AT3G14990.1	Class I glutamine amidotransferase-like			Yes
NIaPro	AT5G45390.1	CLPP4			Yes
NIaPro	AT1G11125.1	hypothetical			Yes

## Sheet: NIb
viral	host	funtion				BiFC positive
NIb	AT1G20225.1	Thioredoxin superfamily protein
NIb	AT1G68610.1	PCR11
NIb	AT4G30000.1	Dihydropterin pyrophosphokinase
NIb	AT2G02990.1	ATRNS1
NIb	AT5G51110.1	Transcriptional coactivator/pterin
NIb	AT5G40760.1	G6PD6
NIb	AT1G05060.1	coiled-coil protein
NIb	AT2G37060.3	NF-YB8
NIb	AT1G74470.1	Pyridine nucleotide-disulphide oxidoreductase
NIb	AT3G45050.3	transmembrane protein
NIb	AT2G03420.1	hypothetical
NIb	AT3G59940.1	Galactose oxidase
NIb	AT1G11770.1	FAD-binding Berberine family protein
NIb	AT2G04700.1	ferredoxin thioredoxin reductase
NIb	AT4G02590.1	UNE12
NIb	AT3G54210.1	Ribosomal protein L17
NIb	AT3G15640.1	Rubredoxin-like superfamily protein				Yes
NIb	AT2G07787.1	hypothetical
NIb	AT1G32060.1	PRK | phosphoribulokinase
NIb	AT3G54826.1	Zim17-type zinc finger
NIb	AT1G75630.1	AVA-P4
NIb	AT1G49430.1	LACS2
NIb	AT2G43590.1	Chitinase family protein
NIb	AT1G14150.1	PQL1
NIb	AT5G03370.1	acylphosphatase family
NIb	AT5G14760.1	L-aspartate oxidase				Yes
NIb	AT2G19050.1	GDSL-like Lipase/Acylhydrolase superfamily protein
NIb	AT1G54630.1	ACP3
NIb	AT3G58610.1	ketol-acid reductoisomerase
NIb	AT3G24180.1	GBA2 type family protein
NIb	AT1G72370.1	RP40
NIb	AT2G04280.1	calcium ion-binding protein
NIb	AT5G20720.1	CPN20
NIb	AT1G48450.1	tRNA ligase
NIb	AT4G21090.2	MFDX2
NIb	AT2G40090.1	ABC2 homolog 9
NIb	AT2G20360.1	NAD(P)-binding Rossmann-fold superfamily
NIb	AT1G27385.1	phosphoribosylformylglycinamidine synthase
NIb	AT2G39090.2	AtAPC7
NIb	AT3G05680.1	EMB2016
NIb	AT4G16420.1	ADA2B
NIb	AT1G64850.1	Calcium-binding EF
NIb	AT1G74880.1	NAD(P)H:plastoquinone dehydrogenase
NIb	AT1G21440.1	Phosphoenolpyruvate carboxylase family protein
NIb	AT4G19120.1	ERD3
NIb	AT5G42000.1	ORMDL family protein
NIb	AT4G37250.1	Leucine-rich repeat protein kinase
NIb	AT1G25280.1	AtTLP10
NIb	AT1G03610.1	AT1G03610.1
NIb	AT5G14050.1	Transducin/WD40
NIb	AT1G52520.1	FAR1-related sequence 6
NIb	AT3G04120.1	GAPC, GAPC-1, GAPC1
NIb	AT4G37310.1	CYP81H1
NIb	AT1G17745.1	D-3-phopsphoglycerate dehydrogenase
NIb	AT1G32520.1	OXR4
NIb	AT1G23750.1	Nucleic acid-binding, OB-fold-like protein
NIb	AT1G23750.1	CESA1
NIb	AT1G15480.1	Tetratricopeptide repeat (TPR)-like superfamily
NIb	AT4G32915.1	glutamyl-tRNA
NIb	AT4G09460.1	AtMYB6, MYB6
NIb	AT5G26670.1	Pectinacetylesterase family protein
NIb	AT3G24040.1	Core-2/I-branching
NIb	AT4G16360.1	5'-AMP-activated protein kinase
NIb	AT4G32530.1	ATPase, F0/V0 complex
NIb	AT1G74370.1	RING/U-box superfamily protein
NIb	AT5G19370.1	rhodanese-like domain-containing protein
NIb	AT4G33520.1	PAA1, HMA6 | P-type ATP-ase 1
NIb	AT3G01085.1	Protein kinase superfamily protein
NIb	AT1G11430.1	plastid developmental protein DAG,
NIb	AT1G13440.1	GAPC-2
NIb	AT3G12710.1	DNA glycosylase superfamily protein
NIb	AT3G02360.2	6-phosphogluconate dehydrogenase family protein
NIb	AT4G13830.2	DNAJ-like 20
NIb	AT5G25190.1	Integrase-type DNA-binding superfamily protein
NIb	AT1G26630.1	eIF-5A 1
NIb	AT4G18740.2	Rho termination factor
NIb	AT1G62710.1	BETA-VPE
NIb	AT5G62790.1	DXR
NIb	AT2G20300.1	ALE2
NIb	AT2G28790.1	Pathogenesis-related thaumatin superfamily protein
NIb	AT5G36170.3	ATPRFB
NIb	AT1G03600.1	PSB27
NIb	AT5G58800.2	Quinone reductase family protein
NIb	AT1G70760.1	CRR23
NIb	AT4G38510.3	ATPase, V1 complex
NIb	AT3G15190.1	chloroplast 30S ribosomal protein S20
NIb	AT1G56280.1	ATDI19
NIb	AT5G20150.1	SPX1
NIb	AT5G63310.1	NDPK2
NIb	AT1G79530.1	GAPCP-1
NIb	AT2G27200.1	P-loop containing nucleoside triphosphate hydrolases
NIb	AT1G79690.1	NUDT3
NIb	AT2G39800.1	P5CS1
NIb	AT5G65210.6	bZIP transcription factor
NIb	AT3G13490.1	OVA5
NIb	AT5G50570.1	SPL13
NIb	AT3G19220.1	CYO1
NIb	AT2G41600.3	Mitochondrial glycoprotein family protein
NIb	AT1G30070.1	SGS domain-containing protein				Yes
NIb	AT2G04780.1	FLA7
NIb	AT2G21960.1	transmembrane protein
NIb	AT1G06290.1	ACX3
NIb	AT1G67930.1	Golgi transport complex protein-related
NIb	AT5G65720.1	ATNIFS1
NIb	AT5G43940.2	HOT5
NIb	AT1G28520.1	VOZ1
NIb	AT2G43090.1	Aconitase/3-isopropylmalate dehydratase protein
NIb	AT1G70370.1	PG2
NIb	AT1G18640.2	3-phosphoserine phosphatase
NIb	AT4G15530.3	PPDK
NIb	AT1G09620.1	leucine-tRNA ligases
NIb	AT5G47750.1	D6PKL2
NIb	AT2G30750.1	CYP71A12
NIb	AT1G50250.1	FTSH1
NIb	AT2G13360.1	SGAT
NIb	AT4G29810.2	ATMKK2
NIb	AT4G12060.1	Double Clp-N motif protein
NIb	AT3G55646.1	TPRXL
NIb	AT4G17730.1	SYP23
NIb	AT1G20100.1	DNA ligase
NIb	AT1G26160.1	Metal-dependent phosphohydrolase
NIb	AT3G58730.1	vacuolar ATP synthase subunit D
NIb	AT2G17980.1	Sec1/munc18-like (SM) proteins
NIb	AT5G52970.1	thylakoid lumen 15.0 kDa protein
NIb	AT3G52600.2	CWINV2
NIb	AT5G58530.1	Glutaredoxin family protein
NIb	AT3G29575.1	AFP3
NIb	AT5G40770.1	ATPHB3
NIb	AT3G11830.1	TCP-1/cpn6
NIb	AT2G27860.1	AXS1
NIb	AT5G21150.1	AGO9
NIb	AT3G22425.2	imidazoleglycerol-phosphate dehydratase
NIb	ATCG00800.1	structural constituent of ribosome
NIb	AT3G10730.1	SUN2
NIb	AT3G12930.1	Lojap-related protein
NIb	AT1G29900.1	CARB
NIb	ATCG01100.1	NADH dehydrogenase family protein
NIb	AT5G06000.1	EIF3G2
NIb	AT5G09650.1	AtPPa6
NIb	AT1G26960.1	AtHB23
NIb	AT2G44230.1	hypothetical
NIb	AT5G56760.1	ATSERAT1
NIb	AT3G25495.1	pseudogene of leucine-rich repeat protein
NIb	AT3G26000.1	Ribonuclease inhibitor
NIb	AT3G51260.1	PAD1
NIb	AT5G02020.1	SIS
NIb	AT1G69295.1	PDCB4
NIb	AT5G44720.1	Molybdenum cofactor sulfurase family protein
NIb	AT3G20290.1	ATEHD1
NIb	AT1G51980.1	Insulinase
NIb	AT4G26370.1	antitermination NusB domain-containing
NIb	AT5G66120.2	3-dehydroquinate synthase
NIb	AT3G44820.1	Phototropic-responsive NPH3
NIb	AT1G54610.3	Protein kinase superfamily protein
NIb	AT2G45660.1	AGL20
NIb	AT3G61680.1	alpha/beta-Hydrolases superfamily protein
NIb	AT1G65150.2	TRAF-like family protein
NIb	AT1G01610.1	ATGPAT4
NIb	AT4G17770.1	ATTPS5
NIb	AT5G09320.1	VPS9B
NIb	AT2G18470.1	PERK4
NIb	AT3G44620.1	protein tyrosine phosphatases
NIb	AT5G42470.1	BRCA1-A
NIb	AT4G02440.1	EID1
NIb	AT1G64280.1	NPR1
NIb	AT1G65260.1	PTAC4
NIb	AT1G80620.1	S15/NS1
NIb	AT1G50480.1	THFS
NIb	AT2G32990.1	AtGH9B8
NIb	AT1G31050.1	basic helix-loop-helix (bHLH) DNA-binding
NIb	AT2G43370.1	RNA-binding (RRM/RBD/RNP motifs)
NIb	AT4G28610.1	AtPHR1
NIb	AT5G01920.1	STN8
NIb	AT4G02480.1	AAA-type ATPase family protein
NIb	AT3G58030.1	RING/U-box superfamily protein
NIb	AT4G36195.3	Serine carboxypeptidase S28
NIb	AT2G48160.1	Tudor/PWWP/MBT domain-containing protein
NIb	AT1G13170.2	ORP1D
NIb	AT5G23120.1	HCF136
NIb	AT3G14080.2	Small nuclear ribonucleoprotein family				Yes
NIb	AT5G17770.1	ATCBR
NIb	AT1G74470.1	Pyridine nucleotide-disulphide
NIb	AT5G60600.1	GCPE
NIb	AT1G22770.1	gigantea protein
NIb	AT1G78995.1	hypothetical
NIb	AT1G60610.1	SBP (S-ribonuclease binding protein) family protein
NIb	AT5G42620.1	metalloendopeptidases
NIb	AT1G51170.1	Protein kinase superfamily protein
NIb	AT4G33300.1	ADR1-L1				Yes
NIb	AT5G15760.1	PSRP-3/Ycf65
NIb	AT1G66150.1	TMK1
NIb	AT1G22410.1	Class-II DAHP synthetase family protein
NIb	AT4G32940.1	GAMMAVPE
NIb	AT3G52360.1	transmembrane protein
NIb	AT5G64460.8	Phosphoglycerate mutase
NIb	AT4G22930.1	PYR4
NIb	AT4G03200.2	AT4G03200.2
NIb	AT1G73490.2	RNA-binding (RRM/RBD/RNP motifs)
NIb	AT2G44650.1	CHL-CPN10
NIb	AT2G46535.1	AT2G46535.1
NIb	AT3G59380.1	ATFTA
NIb	AT3G04700.1	carboxylate clamp-TPR protein
NIb	AT5G08660.1	D-lactate dehydrogenase
NIb	AT5G45040.1	Cytochrome c
NIb	AT5G59080.1	AT5G59080.1
NIb	AT1G56650.1	PAP1
NIb	AT1G08970.2	NF-YC9
NIb	AT3G18710.1	PUB29
NIb	AT5G47530.1	Auxin-responsive family protein
NIb	AT1G15950.1	CCR1
NIb	AT4G37980.1	ELI3-1
NIb	AT2G44560.1	glycosyl hydrolase 9B11
NIb	AT1G25420.1	Vps4 activity in the MVB
NIb	AT5G23450.3	ATLCBK1
NIb	AT5G48330.1	Regulator of chromosome condensation (RCC1
NIb	AT5G09800.1	ARM repeat superfamily protein
NIb	AT1G60070.2	Adaptor protein complex AP-1
NIb	AT1G77080.4	AGL27
NIb	AT5G45020.2	Glutathione S-transferase family protein
NIb	AT3G27430.2	PBB1
NIb	AT3G09820.2	ADK1
NIb	AT1G08970.2	HAP5C
NIb	AT1G15550.1	GA3OX1
NIb	AT5G60160.1	Zn-dependent exopeptidases superfamily
NIb	AT1G63940.1	MDAR6
NIb	AT5G13390.1	NEF1
NIb	AT2G43230.2	Protein kinase superfamily protein
NIb	AT4G34480.1	O-Glycosyl hydrolases
NIb	AT5G20200.1	nucleoporin-related
NIb	AT1G20410.1	Pseudouridine synthase family protein
NIb	AT3G07630.1	ADT2
NIb	AT4G38225.1	glycerol kinase
NIb	AT1G07110.1	ATF2KP
NIb	AT1G58235.1	AT1G58235.1
NIb	AT3G28180.1	ATCSLC04
NIb	AT3G44110.1	DNAJ homologue 3
NIb	AT4G36360.1	BGAL3
NIb	AT1G34000.1	OHP2
NIb	AT2G21240.1	BPC4
NIb	AT2G21850.1	Cysteine/Histidine-rich C1 domain family
NIb	AT3G02070.1	Cysteine proteinases superfamily
NIb	AT5G15470.1	GAUT14
NIb	AT3G13330.1	PA200
NIb	AT5G63400.1	ADK1
NIb	AT5G18110.1	NCBP
NIb	AT3G12780.1	PGK1
NIb	AT3G07630.1	ADT2
NIb	AT5G15470.1	GAUT14
NIb	AT1G73060.1	Low PSII Accumulation 3
NIb	AT4G08170.2	Inositol 1,3,4-trisphosphate 5/6-kinase family
NIb	AT1G77080.4	MAF1
NIb	AT5G60600.1	GCPE
NIb	AT3G57870	SUMO-conjugating enzime SCE1				curated from literature
NIb	AT4G34110	PAB2				curated from literature
NIb	AT2G23350	PAB4				curated from literature
NIb	AT1G49760	PAB8				curated from literature
NIb	AT3G09440	Hsc70-3				curated from literature
NIb	AT5G55170	SUMO3				curated from literature
