# Supplementary material for: A binary interaction map between turnip mosaic virus and Arabidopsis thaliana proteomes
Source: Commun Biol. 2023 Jan 11;6:28. doi: 10.1038/s42003-023-04427-8 (PMC9834402; doi:10.1038/s42003-023-04427-8)
Supplement: Supplementary file 7 — Supplementary Data 4 [file 42003_2023_4427_MOESM7_ESM.xlsx]

## Sheet: pN-pS analysis
OG	AT locus	group	LENG At	LENG align	LENG trim align	P1_nonsyn	P2_nonsyn	P1_syn	P2_syn	D_nonsyn	D_syn	neutrality.index	alpha	fisher.P.value	Duplicates	DoS	Interactor
OG0000050	ATMG00860.1	variable	790	7465	780	0	132	0	28	39	19	NA	NA	1	1	0.172414	0
OG0000087	AT2G07190.1	variable	2247	3145	2130	92	196	6	21	53	6	1.73585	-0.735849	0.368852	1	-0.0404704	0
OG0000124	AT4G36840.1	variable	1187	2110	1185	22	131	10	20	24	6	0.55	0.45	0.389702	1	0.1125	0
OG0000129	AT3G32050.1	variable	872	2160	830	18	75	0	8	45	5	Inf	#NAME?	0.314648	1	-0.1	0
OG0000256	AT1G63320.1	variable	945	1715	940	12	179	2	32	23	9	2.34783	-1.34783	0.46046	1	-0.138393	0
OG0000330	AT4G11000.1	variable	1226	2415	1230	76	95	11	16	17	2	0.812834	0.187166	1	1	0.0211736	0
OG0000383	AT5G45220.1	variable	2729	2770	2535	74	184	26	28	46	10	0.618729	0.381271	0.322526	1	0.0814286	0
OG0000394	AT1G11270.2	variable	1560	1990	1510	32	137	1	29	51	8	5.01961	-4.01961	0.149542	1	-0.10529	0
OG0000412	AT1G66235.1	variable	1406	2450	1415	153	130	11	16	32	4	1.73864	-0.738636	0.481077	1	-0.0440379	0
OG0000463	AT4G11900.1	variable	4234	4425	4110	220	190	50	70	83	14	0.742169	0.257831	0.436238	1	0.0408553	0
OG0000464	AT1G73490.1	variable	1294	1335	935	9	59	0	12	47	1	Inf	#NAME?	1	1	-0.0208333	1
OG0000482	AT1G07910.1	variable	5520	5910	5520	83	89	22	66	43	44	3.86047	-2.86047	1.90216e-05	1	-0.296223	0
OG0000484	AT1G66940.1	variable	1660	1690	1645	44	102	14	28	19	17	2.81203	-1.81203	0.0254316	1	-0.230843	0
OG0000485	AT1G67020.1	variable	3294	3450	1355	3	180	0	17	105	8	Inf	#NAME?	1	1	-0.0707965	0
OG0000513	AT4G30760.1	variable	955	1425	935	18	138	0	12	37	3	Inf	#NAME?	0.544983	1	-0.075	0
OG0000523	AT5G45210.1	variable	3485	3925	3485	24	217	6	34	15	6	1.6	-0.6	0.518396	1	-0.0857143	0
OG0000529	AT5G45240.1	variable	4056	4495	3455	23	469	4	66	94	12	0.734043	0.265957	0.740043	1	0.0349406	0
OG0000551	AT4G08867.1	variable	693	2855	650	17	44	1	3	45	3	1.13333	-0.133333	1	1	-0.00694444	0
OG0000578	AT1G64100.1	variable	3320	3940	3130	165	245	19	45	85	24	2.45201	-1.45201	0.00976036	1	-0.116923	0
OG0000600	AT5G58003.1	variable	2200	2275	2180	13	40	9	34	33	40	1.75084	-0.750842	0.331765	1	-0.138854	0
OG0000612	AT2G04032.1	variable	1825	1915	1825	43	178	12	89	33	11	1.19444	-0.194444	0.811934	1	-0.0318182	0
OG0000765	AT2G42480.1	variable	1849	2055	1825	51	162	10	32	45	5	0.566667	0.433333	0.408638	1	0.0639344	0
OG0000766	AT5G45060.1	variable	5823	5855	5820	170	226	81	83	74	50	1.41808	-0.418085	0.135247	1	-0.0805166	0
OG0000772	AT1G09620.1	variable	5455	5485	5445	50	82	28	124	75	48	1.14286	-0.142857	0.765466	1	-0.0312695	1
OG0000777	AT4G22390.1	variable	2008	2275	2005	47	84	13	39	57	24	1.52227	-0.522267	0.335965	1	-0.0796296	0
OG0000785	AT5G63820.1	variable	1125	1590	1095	25	86	1	4	34	3	2.20588	-1.20588	0.636625	1	-0.0426195	0
OG0000793	AT1G36095.1	variable	1497	2170	1280	50	99	2	7	47	1	0.531915	0.468085	1	1	0.0176282	0
OG0000823	AT3G54760.1	variable	3960	5905	3960	58	112	19	42	141	38	0.822695	0.177305	0.623356	1	0.0344627	0
OG0000839	AT3G04720.1	variable	1059	1060	1060	14	22	6	23	10	16	3.73333	-2.73333	0.0424106	1	-0.315385	0
OG0000841	AT4G15755.1	Ara1	1445	1525	1415	47	82	10	26	52	19	1.71731	-0.717308	0.288581	1	-0.092167	0
OG0000846	AT5G44630.1	variable	2780	2815	2780	78	139	13	63	32	16	3	-2	0.0146596	1	-0.190476	0
OG0000862	AT3G56700.1	Ara1	2635	2760	2600	17	72	2	28	27	8	2.51852	-1.51852	0.464812	1	-0.123308	0
OG0000866	AT1G30290.1	Ara1	4030	4205	4025	96	105	47	49	38	35	1.8813	-0.881299	0.0380113	1	-0.150781	0
OG0000869	AT3G62380.1	variable	1625	1675	1560	7	92	3	12	31	3	0.225806	0.774194	0.119657	1	0.211765	0
OG0000870	AT1G72290.1	variable	1073	1135	1065	30	71	3	21	40	7	1.75	-0.75	0.512029	1	-0.0580271	0
OG0000872	AT2G16890.2	variable	2458	2730	2460	60	86	12	46	34	33	4.85294	-3.85294	5.39446e-05	1	-0.325871	0
OG0000880	AT3G05450.1	variable	2196	2300	650	5	60	0	7	10	2	Inf	#NAME?	1	1	-0.166667	0
OG0000888	AT2G20620.1	variable	1427	1530	1300	28	149	4	14	34	3	0.617647	0.382353	0.696372	1	0.0439189	0
OG0000892	AT1G71140.1	variable	2425	2535	2425	39	72	23	49	28	35	2.11957	-1.11957	0.0488489	1	-0.184588	0
OG0000905	AT4G10720.1	variable	2221	2235	2225	58	63	27	45	13	16	2.64387	-1.64387	0.0287805	1	-0.234077	0
OG0000912	AT4G30990.1	variable	12995	13330	12920	171	265	55	128	239	131	1.70415	-0.704146	0.00476705	1	-0.110691	0
OG0000919	AT3G57710.1	variable	1751	1780	1745	45	59	16	29	23	15	1.83424	-0.834239	0.186978	1	-0.132442	0
OG0000921	AT4G04910.1	variable	3711	3715	3700	14	13	38	42	29	46	0.584392	0.415608	0.186871	1	0.117436	0
OG0000923	AT4G11580.1	variable	1660	1705	1645	83	132	14	32	30	10	1.97619	-0.97619	0.146532	1	-0.10567	0
OG0000946	AT5G41720.1	variable	933	1920	935	36	89	6	13	29	5	1.03448	-0.0344828	1	1	-0.00420168	0
OG0000951	AT2G36340.1	variable	2068	2080	1805	19	114	2	24	50	7	1.33	-0.33	1	1	-0.0275689	0
OG0000964	AT1G07390.1	variable	5166	5405	5170	86	171	32	82	86	38	1.1875	-0.1875	0.572844	1	-0.0352652	0
OG0000972	AT1G53420.1	variable	4763	5110	4765	96	529	30	207	52	27	1.66154	-0.661538	0.112549	1	-0.103677	0
OG0000984	AT1G25350.1	variable	3975	4015	3975	30	37	23	86	23	46	2.6087	-1.6087	0.0162217	1	-0.232704	0
OG0000990	AT2G27680.1	variable	1920	1930	1920	21	22	14	32	11	27	3.68182	-2.68182	0.00986496	1	-0.310526	0
OG0000995	AT2G14210.1	variable	1169	1195	1165	27	13	17	26	6	11	2.91176	-1.91176	0.0887059	1	-0.260695	0
OG0000999	AT3G61340.1	variable	2048	2110	2025	39	114	8	25	54	17	1.53472	-0.534722	0.490889	1	-0.0692239	0
OG0001002	AT4G39280.1	variable	2425	2425	2425	20	21	39	43	11	21	0.979021	0.020979	1	1	0.00476695	0
OG0001052	AT5G23960.1	Ara1	2733	2735	2715	71	51	27	26	30	11	0.964198	0.0358025	1	1	0.00721752	0
OG0001055	AT1G08985.1	variable	505	515	505	7	37	3	9	16	1	0.145833	0.854167	0.128205	1	0.241176	0
OG0001058	AT4G38220.1	variable	2150	2300	2150	21	22	21	32	26	29	1.11538	-0.115385	0.839327	1	-0.0272727	0
OG0001063	AT2G21790.1	variable	4080	4085	4080	30	29	57	61	18	52	1.52047	-0.520468	0.296127	1	-0.0876847	0
OG0001069	AT4G35120.1	variable	1939	2155	1845	16	98	0	4	29	4	Inf	#NAME?	0.288943	0	-0.121212	0
OG0001080	AT3G29670.1	variable	2256	2275	2255	95	85	41	55	47	29	1.42968	-0.429683	0.2865	1	-0.0801084	0
OG0001082	AT3G23890.1	variable	7365	7370	7135	55	140	39	112	128	77	0.848357	0.151643	0.525414	0	0.0392839	0
OG0001091	AT2G37435.1	variable	856	1355	845	23	73	9	14	29	4	0.35249	0.64751	0.130484	1	0.160038	0
OG0001093	AT3G12000.1	variable	2192	2200	2175	44	167	8	22	52	13	1.375	-0.375	0.630164	1	-0.0461538	0
OG0001099	AT4G10320.1	variable	5949	5950	5950	79	73	73	92	61	67	1.18864	-0.188637	0.548707	1	-0.0431743	0
OG0001104	AT1G10095.1	variable	2100	2125	2100	48	45	19	25	20	10	1.26316	-0.263158	0.637869	1	-0.0497512	0
OG0001118	AT5G63600.1	variable	1623	1695	1625	30	74	14	23	66	13	0.422078	0.577922	0.0682965	1	0.153625	0
OG0001134	AT3G56140.1	Ara1	3725	3745	3725	47	61	20	52	27	45	3.91667	-2.91667	0.000165179	1	-0.326493	0
OG0001148	AT1G14590.1	variable	1929	1950	1905	19	17	4	32	18	38	10.0278	-9.02778	5.23944e-05	1	-0.504658	0
OG0001151	AT4G31660.1	variable	1252	1350	1250	22	174	6	23	19	4	0.77193	0.22807	1	0	0.0403727	0
OG0001155	AT3G53270.1	variable	1400	1415	1400	25	31	9	19	35	15	1.19048	-0.190476	0.808432	1	-0.0352941	0
OG0001159	AT3G27430.2	variable	1370	1370	1370	22	13	30	68	2	5	1.83333	-0.833333	0.689354	1	-0.137363	1
OG0001170	AT3G56060.1	variable	2882	2885	2885	60	74	24	60	41	33	2.0122	-1.0122	0.0463919	1	-0.160232	0
OG0001192	AT1G22590.1	Ara1	625	820	625	9	49	3	17	14	2	0.428571	0.571429	0.623932	1	0.125	0
OG0001196	AT2G22590.1	Ara1	2347	2355	2350	60	123	33	71	19	19	1.81818	-0.818182	0.168049	1	-0.145161	0
OG0001217	AT5G04170.1	variable	1770	1995	1765	19	72	14	47	11	22	2.71429	-1.71429	0.0827798	1	-0.242424	0
OG0001222	AT5G24670.1	variable	2000	2000	2000	46	38	20	27	14	12	1.97143	-0.971429	0.223637	1	-0.158508	0
OG0001224	AT5G54160.1	variable	1814	1815	1815	20	10	24	32	6	31	4.30556	-3.30556	0.00800599	1	-0.292383	0
OG0001225	AT5G26830.1	variable	3545	3590	3545	30	47	34	58	27	27	0.882353	0.117647	0.853496	1	0.03125	0
OG0001226	AT1G14610.1	variable	5538	5575	5540	56	80	27	68	57	90	3.27485	-2.27485	3.48368e-05	1	-0.286944	0
OG0001235	AT1G30620.1	variable	2095	2100	2090	18	9	24	31	6	25	3.125	-2.125	0.0450023	1	-0.235023	0
OG0001239	AT4G03430.1	Ara1	5145	5535	5100	49	133	95	86	46	35	0.392449	0.607551	0.00118655	1	0.227623	0
OG0001274	AT3G42050.1	variable	2205	2260	2205	26	11	34	42	11	16	1.1123	-0.112299	1	1	-0.0259259	0
OG0001280	AT5G03790.1	variable	1175	1205	1155	32	19	18	14	16	10	1.11111	-0.111111	1	1	-0.0246154	0
OG0001338	AT5G11950.1	variable	1080	1220	1080	4	6	8	6	3	13	2.16667	-1.16667	0.418357	1	-0.145833	0
OG0001376	AT3G15351.1	variable	824	845	825	7	9	3	17	11	11	2.33333	-1.33333	0.446063	1	-0.2	0
OG0001399	AT1G52700.1	variable	1275	1275	1275	13	7	25	18	7	7	0.52	0.48	0.347009	1	0.157895	0
OG0001401	AT3G10010.1	Ara1	6658	7090	6565	126	303	42	117	156	67	1.28846	-0.288462	0.305663	1	-0.0504484	0
OG0001416	AT4G18230.1	Ara1	1165	1245	1165	25	17	14	16	5	10	3.57143	-2.57143	0.0660691	1	-0.307692	0
OG0001418	AT2G45950.1	Ara1	1711	1890	1710	35	37	11	24	6	13	6.89394	-5.89394	0.00145512	1	-0.44508	0
OG0001423	AT2G43410.3	variable	4290	4520	4205	53	86	25	46	82	46	1.18927	-0.189268	0.650801	1	-0.0388622	0
OG0001426	AT2G24765.1	variable	910	910	910	5	4	18	43	1	2	0.555556	0.444444	1	1	0.115942	0
OG0001460	AT3G53000.1	variable	1499	1500	1485	16	4	18	26	9	15	1.48148	-0.481481	0.592329	1	-0.0955882	0
OG0001478	AT3G07610.1	variable	5135	5190	4880	22	160	17	56	111	32	0.373079	0.626921	0.0135615	1	0.212121	0
OG0001479	AT4G35000.1	variable	1435	1435	1435	18	7	12	23	17	22	1.94118	-0.941176	0.226981	1	-0.164103	0
OG0001482	AT1G52740.1	variable	670	670	670	0	0	10	7	0	9	NA	NA	1	1	0	0
OG0001498	AT5G27470.1	variable	2255	2255	2255	21	22	28	62	11	31	2.11364	-1.11364	0.124577	1	-0.166667	0
OG0001501	AT1G60200.1	Ara1	4495	4610	4495	98	60	44	57	48	41	1.90246	-0.902462	0.0249995	1	-0.150815	0
OG0001519	AT3G50430.1	Ara1	3209	3350	3210	78	98	28	39	75	32	1.18857	-0.188571	0.648199	1	-0.0349145	0
OG0001532	AT4G34200.1	variable	3015	3015	3010	15	13	20	63	22	49	1.67045	-0.670455	0.280088	1	-0.118712	0
OG0001569	AT4G38940.1	variable	1848	1850	1835	20	47	11	28	41	23	1.01996	-0.0199557	1	1	-0.00453629	0
OG0001581	AT5G16120.2	variable	1754	1910	1755	23	14	14	29	19	30	2.59398	-1.59398	0.0493509	1	-0.233867	0
OG0001584	AT1G70250.1	variable	3996	4045	3345	73	161	35	66	160	38	0.495357	0.504643	0.0115619	1	0.132155	0
OG0001622	AT1G73530.1	Ara1	904	955	895	19	25	11	8	16	11	1.1875	-0.1875	0.790883	1	-0.0407407	0
OG0001632	AT3G60320.1	variable	3979	3980	3940	39	49	38	47	41	65	1.62709	-0.627086	0.1314	1	-0.119701	0
OG0001644	AT5G55300.1	variable	4580	4620	4575	61	75	24	65	55	33	1.525	-0.525	0.201111	1	-0.0926471	0
OG0001657	AT1G01710.1	variable	2135	4225	2135	22	20	13	36	21	28	2.25641	-1.25641	0.0809282	1	-0.2	0
OG0001661	AT1G65820.1	Ara1	730	730	725	12	14	13	12	5	9	1.66154	-0.661538	0.517769	1	-0.122857	0
OG0001675	AT1G68750.1	variable	5155	5190	5160	83	39	54	93	41	66	2.47425	-1.47425	0.00076338	1	-0.222662	0
OG0001689	AT3G43920.1	variable	7652	7950	7650	430	233	122	81	59	39	2.32981	-1.32981	0.000341455	1	-0.176945	0
OG0001699	AT3G29375.1	variable	1773	1880	1045	18	66	2	9	22	5	2.04545	-1.04545	0.681881	0	-0.0851852	0
OG0001700	AT1G74960.1	variable	2705	2715	2705	8	27	18	42	13	31	1.05983	-0.0598291	1	1	-0.0122378	0
OG0001727	AT2G41150.2	variable	2015	2015	2015	43	21	16	33	14	32	6.14286	-5.14286	2.58624e-05	1	-0.424466	0
OG0001729	AT5G47550.1	variable	610	630	605	11	22	6	11	16	10	1.14583	-0.145833	1	1	-0.0316742	0
OG0001738	AT2G33750.1	Ara1	1787	1810	1745	23	29	16	15	17	15	1.26838	-0.268382	0.639369	0	-0.0584936	0
OG0001748	AT5G60840.1	variable	1035	1105	955	15	47	4	13	50	9	0.675	0.325	0.723892	0	0.0579839	0
OG0001760	AT1G28560.1	Ara1	1875	4220	1825	41	38	13	15	45	18	1.26154	-0.261538	0.675912	1	-0.0449735	0
OG0001763	AT3G19260.1	variable	1480	1495	1475	20	15	15	30	12	12	1.33333	-0.333333	0.606767	1	-0.0714286	0
OG0001779	AT5G39970.1	Ara1	3450	3460	3445	81	93	41	50	40	20	0.987805	0.0121951	1	1	0.00273224	0
OG0001799	AT4G30640.1	variable	1503	1505	1495	11	107	0	21	21	5	Inf	#NAME?	0.294673	1	-0.192308	0
OG0001809	AT2G31305.1	variable	536	565	535	10	13	3	5	1	10	33.3333	-32.3333	0.00134928	1	-0.678322	0
OG0001813	AT1G59820.1	Ara1	6065	6070	6065	41	25	100	83	14	39	1.14214	-0.142143	0.858309	1	-0.0266292	0
OG0001816	AT4G20360.1	variable	2380	2400	2380	9	8	34	48	13	26	0.529412	0.470588	0.223549	1	0.124031	0
OG0001817	AT1G54180.1	Ara1	1850	1860	1720	27	12	16	24	21	26	2.08929	-1.08929	0.0955471	1	-0.181098	0
OG0001822	AT1G76405.2	variable	836	840	835	10	13	11	11	5	4	0.727273	0.272727	1	1	0.0793651	0
OG0001825	AT2G38430.1	variable	1963	1965	1955	50	66	8	25	64	23	2.24609	-1.24609	0.0973504	0	-0.126437	0
OG0001827	AT2G36530.1	variable	2220	2220	2220	6	8	22	35	7	38	1.48052	-0.480519	0.544124	1	-0.0587302	0
OG0001834	AT2G47430.1	variable	5610	5685	5600	100	168	41	68	99	48	1.18256	-0.182557	0.526263	1	-0.0357505	0
OG0001838	AT1G56270.1	variable	806	990	760	59	35	8	10	82	14	1.25915	-0.259146	0.816299	1	-0.0264303	0
OG0001840	AT1G77180.1	variable	3065	5400	3055	30	30	17	38	42	52	2.18487	-1.18487	0.0342129	1	-0.191489	0
OG0001844	AT1G80190.1	Ara1	1005	1005	1005	7	10	13	17	2	16	4.30769	-3.30769	0.130459	1	-0.238889	0
OG0001852	AT2G44160.1	variable	2970	2970	2970	31	14	31	51	11	26	2.36364	-1.36364	0.0598284	1	-0.202703	0
OG0001859	AT4G19970.1	variable	1885	1885	1875	49	38	28	35	22	33	2.625	-1.625	0.00835089	1	-0.236364	0
OG0001861	AT5G40680.1	Ara1	2074	2215	2075	54	115	26	55	52	11	0.439349	0.560651	0.0542571	1	0.150397	0
OG0001863	AT1G69680.1	variable	1009	1010	1010	34	11	7	13	7	11	7.63265	-6.63265	0.00155638	1	-0.440379	0
OG0001871	AT3G60740.1	variable	6269	6275	6270	79	93	30	94	66	74	2.95253	-1.95253	5.95364e-05	1	-0.253342	0
OG0001881	AT1G56220.3	Ara1	685	875	680	10	12	9	13	4	3	0.833333	0.166667	1	1	0.0451128	0
OG0001897	AT5G45230.1	variable	6153	6350	5885	72	555	19	166	99	45	1.72249	-0.722488	0.0982691	0	-0.103709	0
OG0001901	AT1G08340.1	variable	1654	1995	1555	19	30	9	22	29	22	1.60153	-0.601533	0.470424	1	-0.109944	0
OG0001905	AT4G11650.1	variable	1219	1220	1220	42	26	33	20	13	26	2.54545	-1.54545	0.0295602	1	-0.226667	0
OG0001906	AT2G36307.1	variable	335	545	330	1	3	5	6	1	3	0.6	0.4	1	1	0.0833333	0
OG0001914	AT2G36490.1	variable	6964	8125	6925	126	193	45	100	206	100	1.35922	-0.359223	0.177134	1	-0.0636395	0
OG0001916	AT5G67100.1	variable	7620	7745	7620	99	104	34	89	87	74	2.47667	-1.47667	0.000401723	1	-0.203988	0
OG0001923	AT1G10390.1	variable	5205	5630	5195	55	50	39	65	59	60	1.43416	-0.434159	0.214729	1	-0.0893081	0
OG0001925	AT1G24340.1	variable	3544	3545	3540	72	78	32	57	33	35	2.38636	-1.38636	0.0102216	1	-0.207014	0
OG0001929	AT1G56450.1	variable	1229	1230	1225	18	9	12	22	8	6	1.125	-0.125	1	1	-0.0285714	0
OG0001937	AT1G54650.1	Ara1	1495	1570	1485	28	43	8	35	18	14	2.72222	-1.72222	0.0726452	1	-0.215278	0
OG0001955	AT5G55420.1	variable	520	530	520	16	22	4	9	8	5	2.5	-1.5	0.425139	1	-0.184615	0
OG0001968	AT1G49770.1	Ara1	1540	1625	1540	46	64	22	20	32	21	1.37216	-0.372159	0.447483	0	-0.072697	0
OG0001985	AT3G22425.2	variable	1360	1565	1350	20	18	20	26	18	17	0.944444	0.0555556	1	1	0.0142857	1
OG0001995	AT4G00872.1	variable	855	860	845	27	46	4	12	23	10	2.93478	-1.93478	0.132156	1	-0.173998	0
OG0002014	AT1G59453.1	variable	8766	9525	8680	100	127	42	115	119	77	1.54062	-0.540616	0.083314	1	-0.0970825	0
OG0002016	AT4G37608.1	variable	435	450	435	6	10	3	2	13	2	0.307692	0.692308	0.325593	1	0.2	0
OG0002018	AT2G28250.2	Ara1	2825	2830	2825	34	29	18	48	20	38	3.58889	-2.58889	0.00209792	1	-0.309019	0
OG0002034	AT4G38030.1	variable	3329	3375	3320	78	68	34	45	35	15	0.983193	0.0168067	1	1	0.00357143	0
OG0002039	AT1G51340.1	variable	2543	2575	2545	48	78	42	75	17	17	1.14286	-0.142857	0.840847	1	-0.0333333	0
OG0002047	AT5G23150.1	Ara1	6959	7430	6950	142	183	54	65	121	61	1.32568	-0.325681	0.219942	1	-0.0596546	0
OG0002049	AT1G65870.1	Ara1	945	950	935	27	33	7	28	11	6	2.1039	-1.1039	0.314762	1	-0.147059	0
OG0002067	AT3G28150.1	variable	2069	2080	2025	68	55	36	28	15	16	2.01481	-1.01481	0.0969403	1	-0.169975	0
OG0002068	AT5G38280.1	Ara1	3319	3550	3325	134	201	63	61	32	6	0.39881	0.60119	0.0518309	1	0.161902	0
OG0002078	AT1G02750.1	Ara1	1105	1265	1095	29	61	9	15	36	8	0.716049	0.283951	0.592802	1	0.0550239	0
OG0002082	AT4G34140.1	Ara1	2650	2665	2645	71	46	8	19	51	23	4.00245	-3.00245	0.00217648	1	-0.209545	0
OG0002102	AT4G11521.1	variable	1320	1360	1320	95	71	26	17	14	0	0	1	0.0710657	1	0.214876	0
OG0002106	AT5G04047.1	variable	740	750	740	12	51	9	14	23	6	0.347826	0.652174	0.122633	1	0.221675	0
OG0002114	AT1G78580.1	Ara1	4710	4725	4705	18	16	41	64	14	76	2.38328	-1.38328	0.0408387	1	-0.149529	0
OG0002119	AT5G05180.1	Ara1	2156	2355	2155	64	63	10	30	72	28	2.48889	-1.48889	0.0260932	1	-0.144865	0
OG0002120	AT5G63370.1	Ara1	3060	3205	3060	38	280	7	115	28	22	4.26531	-3.26531	0.00353542	1	-0.284444	0
OG0002140	AT1G14530.2	variable	1515	1530	1515	22	34	13	23	6	18	5.07692	-4.07692	0.00743673	1	-0.378571	0
OG0002150	AT4G32670.1	variable	4296	4495	4240	55	253	10	58	24	9	2.0625	-1.0625	0.182864	0	-0.118881	0
OG0002168	AT4G12590.1	variable	1230	1230	1230	3	6	24	18	5	19	0.475	0.525	0.450527	1	0.0972222	0
OG0002169	AT3G61390.1	variable	1863	2260	1865	43	97	13	29	57	11	0.638327	0.361673	0.366188	1	0.0703782	0
OG0002173	AT3G17140.1	variable	559	815	560	16	23	5	10	11	8	2.32727	-1.32727	0.313954	1	-0.182957	0
OG0002174	AT1G19610.1	variable	390	390	390	5	8	3	5	1	2	3.33333	-2.33333	0.545455	0	-0.291667	0
OG0002175	AT2G44670.1	variable	465	465	465	4	1	6	9	3	5	1.11111	-0.111111	1	1	-0.025	0
OG0002177	AT3G05490.1	variable	595	630	590	5	4	2	15	7	11	3.92857	-2.92857	0.201556	1	-0.325397	0
OG0002180	AT5G26360.1	variable	2775	3165	2775	10	14	35	51	7	28	1.14286	-0.142857	1	1	-0.0222222	1
OG0002186	AT3G58590.1	Ara1	3705	3705	3705	69	60	21	44	89	51	1.88283	-0.882825	0.0417965	1	-0.130952	0
OG0002187	AT1G60170.1	variable	2425	2425	2425	16	17	27	37	22	46	1.23906	-0.239057	0.682543	1	-0.0485636	0
OG0002194	AT2G36710.1	variable	2034	2065	2030	51	57	29	45	18	17	1.66092	-0.66092	0.223254	1	-0.123214	0
OG0002195	AT1G31660.1	variable	2220	2290	2220	41	67	34	28	21	22	1.26331	-0.263305	0.570359	1	-0.0582946	0
OG0002199	AT1G35710.1	variable	5597	5725	5585	143	191	37	43	16	7	1.69088	-0.690878	0.2878	1	-0.0987923	0
OG0002207	AT1G71680.1	variable	2240	2260	2240	32	35	24	30	15	41	3.64444	-2.64444	0.00203318	1	-0.303571	0
OG0002208	AT1G10417.1	variable	2155	2310	1945	30	59	7	24	67	14	0.895522	0.104478	0.801371	1	0.0163497	0
OG0002223	AT3G45100.1	variable	2235	3565	2235	54	23	38	34	10	33	4.68947	-3.68947	0.000177823	1	-0.354398	0
OG0002225	AT2G27100.1	variable	3600	3615	3590	48	32	29	60	38	42	1.8294	-0.829401	0.0778484	1	-0.148377	0
OG0002228	AT3G28370.1	Ara1	1459	1600	1300	28	39	12	9	13	15	2.69231	-1.69231	0.077515	1	-0.235714	0
OG0002229	AT4G13780.1	variable	3983	3995	3985	63	31	51	61	29	28	1.1927	-0.192698	0.627579	1	-0.0438596	0
OG0002233	AT1G61350.1	variable	2865	2865	2860	61	23	38	46	18	34	3.03216	-2.03216	0.00200334	1	-0.270008	0
OG0002245	AT1G06680.1	variable	1315	1315	1315	7	39	3	73	2	13	15.1667	-14.1667	0.00895263	1	-0.566667	0
OG0002252	AT1G24145.1	variable	638	975	630	21	63	0	7	12	3	Inf	#NAME?	0.0637255	1	-0.2	0
OG0002254	AT3G62050.1	variable	783	785	705	11	51	5	16	25	4	0.352	0.648	0.244565	1	0.174569	0
OG0002258	AT5G10010.1	Ara1	2170	2220	2170	22	61	10	34	33	24	1.6	-0.6	0.367787	1	-0.108553	0
OG0002259	AT4G01370.1	variable	1880	1885	1875	11	55	34	99	3	15	1.61765	-0.617647	0.738896	1	-0.0777778	0
OG0002261	AT4G34450.1	variable	4430	4430	4430	13	20	29	57	15	46	1.37471	-0.374713	0.505699	1	-0.0636222	0
OG0002264	AT4G22140.1	variable	1171	1415	1170	2	5	7	27	2	10	1.42857	-0.428571	1	1	-0.0555556	0
OG0002269	AT1G50900.1	Ara1	875	885	875	12	13	16	11	7	14	1.5	-0.5	0.56359	1	-0.0952381	0
OG0002270	AT5G44710.1	Ara1	510	720	510	6	2	11	10	6	1	0.0909091	0.909091	0.0686499	1	0.504202	0
OG0002275	AT4G09760.1	variable	1729	1745	1730	48	22	35	19	15	16	1.46286	-0.462857	0.402545	1	-0.0944423	0
OG0002277	AT3G06200.1	Ara1	1410	1420	1410	18	16	9	23	7	19	5.42857	-4.42857	0.00581792	1	-0.397436	0
OG0002280	AT1G77800.1	Ara1	6875	7370	6770	127	99	55	67	117	57	1.12494	-0.124942	0.648501	1	-0.0253884	0
OG0002284	AT5G39510.1	variable	1105	1105	1105	10	43	9	53	9	6	0.740741	0.259259	0.737943	1	0.0736842	0
OG0002286	AT1G07830.1	variable	720	720	720	3	4	3	18	6	10	1.66667	-0.666667	0.65502	1	-0.125	0
OG0002303	AT2G37150.1	Ara1	2729	2900	2715	40	61	15	38	72	31	1.14815	-0.148148	0.854337	1	-0.0282436	0
OG0002304	AT1G01580.1	variable	3625	3625	3615	42	52	28	63	45	36	1.2	-0.2	0.622663	1	-0.0444444	0
OG0002314	AT1G72370.1	variable	1490	1495	1485	10	16	12	27	14	21	1.25	-0.25	0.785227	1	-0.0545455	1
OG0002317	AT3G13940.1	variable	2210	4265	2190	33	57	12	36	99	25	0.694444	0.305556	0.40233	1	0.0650538	0
OG0002319	AT5G27880.1	Ara1	1389	1435	1380	30	71	7	31	34	11	1.38655	-0.386555	0.601114	0	-0.0552553	0
OG0002322	AT3G07520.1	Ara1	4303	4350	4305	57	95	26	57	46	32	1.52508	-0.525084	0.250412	1	-0.0970034	0
OG0002323	AT3G43590.1	variable	2752	3020	2730	117	109	31	35	44	11	0.943548	0.0564516	1	1	0.00945946	0
OG0002324	AT4G00460.2	Ara1	2423	2445	2395	59	45	19	33	24	20	2.58772	-1.58772	0.0254667	1	-0.210956	0
OG0002330	AT3G62790.1	variable	415	415	415	3	2	3	5	0	4	Inf	#NAME?	0.2	1	-0.5	0
OG0002332	AT5G04110.1	variable	2730	2745	2640	60	62	15	33	69	30	1.73913	-0.73913	0.161884	1	-0.10303	0
OG0002333	AT5G05140.1	variable	2180	2260	2170	25	30	12	36	19	29	3.17982	-2.17982	0.0157406	0	-0.279842	0
OG0002338	AT1G77830.1	variable	923	950	910	25	67	2	9	14	4	3.57143	-2.57143	0.19889	1	-0.148148	0
OG0002344	AT4G39160.1	Ara1	3005	3040	2925	34	99	9	37	89	28	1.18851	-0.188514	0.833165	1	-0.0300139	0
OG0002348	AT3G46020.1	variable	510	510	510	9	15	7	11	3	4	1.71429	-0.714286	0.666846	1	-0.133929	0
OG0002359	AT4G13770.1	variable	2510	2510	2510	19	74	43	71	7	25	1.57807	-0.578073	0.46808	1	-0.0877016	0
OG0002361	AT5G26630.1	variable	1090	1105	1090	27	59	9	26	24	6	0.75	0.25	0.770449	1	0.05	0
OG0002368	AT1G64990.1	variable	2340	2340	2340	18	48	34	106	6	16	1.41176	-0.411765	0.597449	1	-0.0734266	0
OG0002372	AT5G61220.1	Ara1	435	445	435	5	12	4	5	17	6	0.441176	0.558824	0.407175	1	0.183575	0
OG0002377	AT2G32415.1	Ara1	4454	4575	4450	60	77	27	70	51	63	2.7451	-1.7451	0.000941195	1	-0.242287	0
OG0002379	AT5G45510.1	variable	6108	6960	5865	224	353	64	54	218	38	0.610092	0.389908	0.0283287	1	0.0737847	0
OG0002389	AT4G16310.1	Ara1	8139	8420	8140	166	113	102	73	93	68	1.18996	-0.189964	0.415618	1	-0.0417632	0
OG0002397	AT4G14660.1	Ara1	891	895	890	21	13	18	16	10	7	0.816667	0.183333	0.777498	0	0.0497738	0
OG0002400	AT5G14120.1	variable	2895	2895	2895	13	41	17	55	13	45	2.64706	-1.64706	0.0511735	1	-0.209195	0
OG0002403	AT3G66656.1	Ara1	890	895	875	12	16	2	15	18	12	4	-3	0.163342	0	-0.257143	0
OG0002404	AT4G14301.1	variable	658	890	655	33	20	4	10	25	6	1.98	-0.98	0.493682	1	-0.0854403	0
OG0002406	AT3G10720.2	variable	3119	3190	3120	52	53	35	76	23	33	2.13168	-1.13168	0.0393122	1	-0.186987	0
OG0002408	AT5G24280.1	Ara1	7988	8225	7830	185	204	74	98	122	64	1.31148	-0.311475	0.212673	1	-0.0583717	0
OG0002417	AT1G04645.1	variable	640	700	640	8	40	3	6	16	2	0.333333	0.666667	0.338638	1	0.161616	0
OG0002419	AT3G51480.1	variable	4515	4515	4515	52	62	34	44	26	56	3.29412	-2.29412	0.000210227	1	-0.287578	0
OG0002426	AT3G07450.1	variable	529	800	530	5	87	0	26	3	3	Inf	#NAME?	0.181818	1	-0.5	0
OG0002428	AT4G34110.1	variable	3145	3160	3145	31	39	19	59	28	23	1.34023	-0.340226	0.546398	1	-0.0709804	1
OG0002435	AT1G12740.1	Ara1	2360	2395	2360	19	25	27	30	21	29	0.971781	0.0282187	1	1	0.00695652	0
OG0002439	AT1G61800.1	variable	1940	2110	1940	38	98	38	96	6	8	1.33333	-0.333333	0.773074	1	-0.0714286	0
OG0002440	AT3G18650.1	Ara1	1928	2045	1915	48	85	11	18	66	15	0.991736	0.00826446	1	1	0.00125549	0
OG0002442	AT3G24093.1	variable	1409	1420	1400	28	87	3	13	41	11	2.50407	-1.50407	0.232916	0	-0.114764	0
OG0002443	AT1G53840.1	variable	2930	2940	2930	24	40	32	71	37	40	0.810811	0.189189	0.599564	1	0.0519481	0
OG0002445	AT2G17980.1	variable	3135	3135	3120	38	23	28	47	27	51	2.56349	-1.56349	0.00724012	1	-0.229604	1
OG0002446	AT5G42830.1	Ara1	2249	2425	2250	65	62	33	47	10	25	4.92424	-3.92424	0.000143248	1	-0.377551	0
OG0002451	AT4G33520.1	variable	1185	4750	1185	10	32	9	23	17	13	0.849673	0.150327	1	1	0.0403509	1
OG0002456	AT1G72600.1	variable	675	715	670	31	34	6	9	12	4	1.72222	-0.722222	0.466723	1	-0.0878378	0
OG0002458	AT4G22290.1	variable	2225	2235	2210	18	10	30	59	4	27	4.05	-3.05	0.0212209	1	-0.245968	0
OG0002459	AT5G46380.1	variable	3033	3900	3005	86	178	17	23	116	13	0.566937	0.433063	0.170309	1	0.0642733	0
OG0002463	AT5G48300.1	variable	2600	2640	2600	19	49	36	94	16	18	0.59375	0.40625	0.270058	1	0.125134	0
OG0002470	AT4G19900.1	Ara1	3220	3305	3210	96	54	43	51	34	37	2.42955	-1.42955	0.00415184	0	-0.211774	0
OG0002471	AT2G30480.1	Ara1	3103	4715	3070	92	236	21	50	53	12	0.991914	0.00808625	1	1	0.00122532	0
OG0002476	AT1G50500.1	variable	4140	4140	4120	32	38	39	71	14	34	1.99267	-0.992674	0.0881815	1	-0.159038	0
OG0002478	AT4G22990.1	Ara1	3494	3500	3495	46	46	68	78	9	40	3.00654	-2.00654	0.00680054	1	-0.219835	0
OG0002480	AT1G28100.1	variable	1409	1410	1410	24	14	13	16	22	16	1.34266	-0.342657	0.637136	1	-0.0697013	0
OG0002481	AT1G68370.1	variable	2050	2055	2050	15	11	23	29	9	27	1.95652	-0.956522	0.219867	1	-0.144737	0
OG0002489	AT4G25090.1	variable	4244	4335	4235	64	64	39	64	116	55	0.778073	0.221927	0.359398	1	0.0570033	0
OG0002491	AT4G33790.1	variable	2465	2465	2465	15	44	13	38	66	25	0.437063	0.562937	0.0679351	1	0.18956	0
OG0002492	AT1G13080.1	Ara1	2509	2510	2510	42	44	20	51	24	37	3.2375	-2.2375	0.00208715	1	-0.283977	0
OG0002494	AT3G19350.1	variable	507	725	335	95	42	2	2	7	0	0	1	1	0	0.0206186	0
OG0002495	AT3G15450.1	variable	1265	1265	1265	12	19	5	21	13	19	3.50769	-2.50769	0.0717674	1	-0.299632	0
OG0002503	AT5G14040.1	variable	1875	1910	1875	10	9	8	38	8	18	2.8125	-1.8125	0.127154	1	-0.247863	0
OG0002508	AT1G21150.1	variable	1948	2005	1950	40	56	19	45	28	16	1.20301	-0.203008	0.679345	1	-0.0416025	0
OG0002512	AT5G41250.1	Ara1	2800	2935	2655	93	48	11	30	203	59	2.45723	-1.45723	0.00803739	1	-0.119422	0
OG0002516	AT4G32400.1	variable	1960	1960	1940	10	23	13	34	14	32	1.75824	-0.758242	0.298306	1	-0.130435	0
OG0002517	AT1G15690.1	variable	3850	3850	3850	7	10	38	70	12	70	1.07456	-0.0745614	1	1	-0.00921409	0
OG0002523	AT3G04600.1	variable	2010	2010	2010	24	13	23	34	10	15	1.56522	-0.565217	0.459646	1	-0.110638	0
OG0002524	AT3G51270.1	Ara1	2305	2330	2305	24	18	30	38	27	22	0.651852	0.348148	0.326483	1	0.106576	0
OG0002525	AT5G19110.1	Ara1	2025	2085	2015	45	177	18	37	24	12	1.25	-0.25	0.654084	1	-0.047619	0
OG0002528	AT3G25180.1	variable	2574	2585	2575	98	68	31	58	39	21	1.70223	-0.702233	0.120009	0	-0.10969	0
OG0002529	AT1G04640.1	variable	1174	1175	1175	18	22	15	15	10	16	1.92	-0.92	0.295367	1	-0.160839	0
OG0002532	AT2G39210.1	variable	3005	3015	2980	28	54	34	70	17	30	1.45329	-0.453287	0.432658	0	-0.0899108	0
OG0002540	AT5G28900.1	Ara1	2680	2705	2680	13	21	19	41	16	48	2.05263	-1.05263	0.157201	1	-0.15625	0
OG0002543	AT3G03341.1	variable	360	615	360	4	25	4	21	0	2	Inf	#NAME?	0.466667	1	-0.5	0
OG0002544	AT1G10170.1	variable	5938	5960	5835	76	112	44	98	71	44	1.07042	-0.0704225	0.892823	1	-0.015942	0
OG0002550	AT3G58840.2	variable	1590	1625	1590	31	28	17	26	37	19	0.936407	0.063593	1	1	0.014881	0
OG0002554	AT3G63330.1	variable	5203	5355	5195	60	90	17	77	77	67	3.07105	-2.07105	0.000441717	1	-0.244499	0
OG0002564	AT5G05170.1	Ara1	5325	5325	5325	11	19	49	91	7	69	2.21283	-1.21283	0.133686	1	-0.0912281	0
OG0002567	AT3G46240.1	variable	2167	2480	2130	91	144	25	47	41	18	1.59805	-0.598049	0.199509	1	-0.0895675	0
OG0002568	AT5G11700.1	Ara1	7095	7275	7095	39	51	45	108	33	73	1.91717	-0.917172	0.0356393	1	-0.152965	0
OG0002570	AT3G26470.1	Ara1	1104	2250	985	11	73	3	10	66	9	0.5	0.5	0.393339	1	0.0942857	0
OG0002575	AT1G49480.1	Ara1	1130	1135	1130	8	20	12	16	12	10	0.555556	0.444444	0.374255	1	0.145455	0
OG0002577	AT4G35110.1	Ara1	1930	1945	1930	21	41	19	38	31	23	0.820034	0.179966	0.678599	1	0.0490741	0
OG0002580	AT2G44820.2	variable	1065	1100	1030	14	32	5	15	31	11	0.993548	0.00645161	1	1	0.00125313	0
OG0002591	AT3G18777.1	variable	1095	1095	1080	16	10	7	18	14	16	2.61224	-1.61224	0.161518	1	-0.228986	0
OG0002594	AT4G22970.1	Ara1	10900	10975	10895	183	204	75	128	131	93	1.73221	-0.732214	0.0053827	1	-0.124481	0
OG0002596	AT4G33690.1	variable	1229	1235	1230	18	48	4	13	22	9	1.84091	-0.840909	0.519913	1	-0.108504	0
OG0002597	AT3G16830.1	variable	5655	5655	5655	41	30	46	88	29	91	2.79685	-1.79685	0.000650469	1	-0.229598	0
OG0002604	AT1G02850.1	Ara1	2346	2485	2350	54	93	16	25	40	31	2.61563	-1.61563	0.0121228	1	-0.208048	0
OG0002606	AT5G11920.1	Ara1	2748	2760	2745	41	148	34	59	33	19	0.694296	0.305704	0.363421	1	0.0879487	0
OG0002610	AT5G49530.1	variable	3445	3505	3430	65	105	31	56	69	29	0.881253	0.118747	0.756602	1	0.0269983	0
OG0002611	AT5G13825.1	Ara1	620	980	620	6	50	0	16	39	10	Inf	#NAME?	0.578554	0	-0.204082	0
OG0002612	AT5G01290.1	Ara1	3283	3390	3285	55	39	40	65	24	24	1.375	-0.375	0.380018	1	-0.0789474	0
OG0002613	AT1G55460.1	variable	2055	2055	2045	24	24	30	27	13	15	0.923077	0.0769231	1	1	0.0198413	0
OG0002617	AT5G12460.1	variable	2205	2470	2205	19	51	23	35	37	26	0.580494	0.419506	0.231141	1	0.134921	0
OG0002618	AT4G12100.1	variable	2166	2765	2130	93	162	18	24	65	8	0.635897	0.364103	0.389696	1	0.0525731	0
OG0002620	AT1G07650.1	variable	5070	5080	5065	39	96	43	88	49	72	1.3327	-0.332701	0.38663	1	-0.0706511	0
OG0002626	AT5G14550.1	Ara1	1884	1890	1885	17	18	11	22	19	19	1.54545	-0.545455	0.457769	1	-0.107143	0
OG0002629	AT5G13460.1	Ara1	2215	2215	2205	18	23	15	29	16	33	2.475	-1.475	0.0676505	1	-0.218924	0
OG0002630	AT4G18250.1	Ara1	3442	5985	3405	83	215	25	74	45	26	1.91822	-0.918222	0.0628252	1	-0.134716	0
OG0002632	AT5G06839.2	Ara1	2085	2315	2085	12	12	17	28	9	28	2.19608	-1.19608	0.185427	1	-0.17055	0
OG0002635	AT1G63770.1	Ara1	4589	4690	4585	80	41	55	66	25	24	1.39636	-0.396364	0.399732	1	-0.0823885	0
OG0002636	AT5G41480.1	Ara1	2649	2650	2650	95	49	35	38	39	22	1.53114	-0.531136	0.235616	1	-0.091425	0
OG0002637	AT5G16100.1	Ara1	1785	2590	1670	12	81	2	7	29	7	1.44828	-0.448276	1	1	-0.0515873	0
OG0002640	AT1G79120.1	Ara1	2065	2240	2065	43	53	13	32	24	13	1.79167	-0.791667	0.242867	1	-0.119208	0
OG0002642	AT4G12020.1	Ara1	8988	9305	5815	197	541	67	99	133	11	0.243183	0.756817	5.93642e-06	1	0.177399	0
OG0002643	AT3G60800.1	variable	1535	1540	1525	10	10	7	29	4	15	5.35714	-4.35714	0.0387742	1	-0.377709	0
OG0002645	AT3G13440.1	Ara1	1390	1390	1305	9	15	15	14	12	26	1.3	-0.3	0.78371	1	-0.0592105	0
OG0002655	AT2G30210.1	Ara1	2850	2850	2850	19	28	27	61	23	55	1.68277	-0.68277	0.23852	1	-0.118172	0
OG0002659	AT2G44065.1	Ara1	1070	1870	1070	7	6	13	18	9	7	0.418803	0.581197	0.312765	1	0.2125	0
OG0002661	AT3G15390.1	variable	2450	2465	2450	53	58	11	16	59	15	1.22496	-0.224961	0.669352	1	-0.0308277	0
OG0002662	AT5G51300.3	variable	4020	4105	4020	40	49	26	82	21	41	3.00366	-2.00366	0.00280698	1	-0.267351	0
OG0002669	AT4G00290.1	Ara1	2485	3165	2480	30	103	19	52	39	38	1.53846	-0.538462	0.274346	1	-0.105751	0
OG0002670	AT2G03760.1	Ara1	1628	2900	1630	38	27	30	30	12	8	0.844444	0.155556	0.801924	1	0.0411765	0
OG0002672	AT1G08065.1	Ara1	1384	1395	1380	36	24	7	12	25	9	1.85143	-0.851429	0.396878	1	-0.101915	0
OG0002673	AT4G08630.1	Ara1	3997	4030	3990	250	60	57	33	42	36	3.7594	-2.7594	1.3822e-06	1	-0.275871	0
OG0002674	AT4G17510.1	variable	1170	1190	1170	26	10	17	21	9	12	2.03922	-1.03922	0.28476	1	-0.17608	0
OG0002675	AT1G63855.1	Ara1	794	1155	790	20	19	9	11	30	3	0.222222	0.777778	0.0509031	1	0.219436	0
OG0002676	AT4G15417.1	Ara1	1318	1510	1320	41	105	14	20	30	5	0.488095	0.511905	0.290632	1	0.111688	0
OG0002678	AT1G10745.1	variable	407	470	410	15	43	1	4	17	4	3.52941	-2.52941	0.36407	1	-0.127976	0
OG0002681	AT4G13955.1	variable	468	470	470	21	37	4	8	16	3	0.984375	0.015625	1	1	0.00210526	0
OG0002682	AT5G48905.1	variable	420	545	410	4	41	5	5	10	2	0.16	0.84	0.158824	0	0.388889	0
OG0002691	AT2G13295.1	variable	564	1250	550	20	80	1	12	27	5	3.7037	-2.7037	0.383713	1	-0.108631	0
OG0002693	AT5G26805.1	variable	769	920	780	252	29	4	0	10	0	0	1	1	0	0.015625	0
OG0002696	AT2G28671.1	variable	2180	2425	2060	50	58	25	56	29	30	2.06897	-1.06897	0.0519215	1	-0.175141	0
OG0002699	AT3G42170.1	Ara1	3480	4175	3475	43	74	62	57	35	42	0.832258	0.167742	0.548831	0	0.0450216	0
OG0002704	AT4G40020.1	variable	3075	3150	3070	39	55	11	47	44	46	3.70661	-2.70661	0.00111872	1	-0.291111	0
OG0002705	AT1G31220.1	variable	1460	1655	1460	39	71	19	31	21	16	1.56391	-0.56391	0.383729	1	-0.104846	0
OG0002706	AT4G13420.1	variable	3924	3930	3920	128	61	81	64	55	72	2.06869	-1.06869	0.00156772	0	-0.179369	0
OG0002708	AT2G21540.1	Ara1	2738	2740	2740	40	29	31	52	17	23	1.74573	-0.745731	0.172821	1	-0.13838	0
OG0002709	AT4G02425.1	variable	1310	1340	1310	19	109	10	51	3	8	5.06667	-4.06667	0.0397777	1	-0.382445	0
OG0002711	AT1G65840.1	Ara1	2485	2485	2480	24	18	29	59	12	41	2.82759	-1.82759	0.0234037	0	-0.226415	0
OG0002712	AT3G05100.1	Ara1	1680	1695	1660	13	17	5	33	21	28	3.46667	-2.46667	0.0526364	1	-0.293651	0
OG0002714	AT3G02090.1	variable	2655	2655	2655	23	22	28	46	10	30	2.46429	-1.46429	0.0524694	1	-0.20098	0
OG0002715	AT1G07840.1	variable	1560	1690	1555	11	25	10	23	47	18	0.421277	0.578723	0.111406	1	0.199267	0
OG0002717	AT1G56070.1	variable	4215	4215	4215	7	32	62	91	16	48	0.33871	0.66129	0.0374061	0	0.148551	0
OG0002718	AT1G55020.1	Ara1	4294	4295	4295	72	54	63	125	18	46	2.92063	-1.92063	0.00127043	1	-0.252083	0
OG0002720	AT5G64210.1	variable	1765	1840	1765	21	184	6	13	17	17	3.5	-2.5	0.0347421	1	-0.277778	0
OG0002725	AT4G02050.1	variable	2565	2585	2560	24	20	36	46	22	31	0.939394	0.0606061	1	0	0.0150943	0
OG0002728	AT3G08040.1	variable	2629	2760	2625	16	45	19	40	19	27	1.19668	-0.196676	0.821341	1	-0.0440994	0
OG0002730	AT5G26110.1	variable	1130	1140	1130	18	13	14	26	5	22	5.65714	-4.65714	0.00371238	1	-0.377315	0
OG0002731	AT3G53690.1	variable	1600	1635	1590	29	41	14	28	25	31	2.56857	-1.56857	0.0270495	1	-0.22799	0
OG0002732	AT4G22930.1	variable	1885	1895	1885	45	13	40	20	6	13	2.4375	-1.4375	0.128047	1	-0.213622	1
OG0002733	AT3G44240.1	variable	1194	1575	1175	85	75	20	26	42	8	0.809524	0.190476	0.823679	1	0.0304762	0
OG0002738	AT1G05320.1	variable	3950	4495	3935	91	87	28	53	64	25	1.26953	-0.269531	0.52078	1	-0.0456048	0
OG0002744	AT2G35530.1	Ara1	2045	2050	2035	33	21	15	19	20	20	2.2	-1.2	0.0843446	1	-0.1875	0
OG0002747	AT2G39280.1	variable	3745	3800	3745	57	83	22	43	63	32	1.31602	-0.316017	0.416941	1	-0.0583611	0
OG0002748	AT5G66550.1	variable	1035	1175	1035	14	21	13	12	9	14	1.67521	-0.675214	0.406899	1	-0.127214	0
OG0002750	AT1G49340.2	variable	10140	10165	10120	112	55	101	164	50	115	2.5505	-1.5505	1.63154e-05	1	-0.222791	0
OG0002751	AT4G12290.1	variable	3704	3725	3705	109	59	55	97	27	36	2.64242	-1.64242	0.00147115	1	-0.236063	0
OG0002752	AT1G48160.1	variable	725	725	725	7	10	8	9	7	10	1.25	-0.25	1	1	-0.054902	0
OG0002753	AT1G32050.1	Ara1	1320	1325	1320	22	6	29	16	1	10	7.58621	-6.58621	0.0421639	1	-0.340463	0
OG0002755	AT2G17380.1	variable	805	810	805	4	5	14	37	0	10	Inf	#NAME?	0.265201	1	-0.222222	0
OG0002759	AT5G06430.1	variable	970	1205	960	12	17	9	21	8	9	1.5	-0.5	0.744639	1	-0.10084	0
OG0002760	AT5G49010.1	variable	1100	1105	1100	16	8	15	17	5	11	2.34667	-1.34667	0.226458	1	-0.203629	0
OG0002761	AT4G22520.1	variable	590	590	585	18	63	2	4	16	6	3.375	-2.375	0.243091	1	-0.172727	0
OG0002764	AT4G24600.1	variable	616	1695	620	6	85	0	10	27	3	Inf	#NAME?	1	0	-0.1	0
OG0002765	AT1G16930.1	Ara1	2245	2405	2240	46	88	5	15	48	35	6.70833	-5.70833	7.28226e-05	1	-0.323648	0
OG0002768	AT3G21320.1	Ara1	2700	2710	2680	52	33	18	28	61	21	0.994536	0.00546448	1	1	0.0010453	0
OG0002769	AT3G27740.1	variable	2150	2150	2145	30	22	27	33	10	28	3.11111	-2.11111	0.0121205	1	-0.263158	0
OG0002770	AT4G02930.1	variable	2270	2555	2260	6	11	35	30	11	19	0.296104	0.703896	0.0480948	1	0.220325	0
OG0002771	AT4G23330.1	variable	1350	1365	720	8	7	5	18	47	23	0.782979	0.217021	0.753877	1	0.056044	0
OG0002773	AT5G54930.1	Ara1	1431	1440	1430	31	28	13	10	27	17	1.50142	-0.501425	0.500262	1	-0.0909091	0
OG0002774	AT1G80960.1	variable	2424	2465	2245	83	133	9	15	22	9	3.77273	-2.77273	0.0161706	1	-0.192496	0
OG0002775	AT2G40360.1	variable	3765	3815	3760	42	58	31	64	62	46	1.0052	-0.00520291	1	0	-0.00126839	0
OG0002781	AT1G29880.1	variable	3645	3675	3645	41	46	37	76	13	35	2.98337	-1.98337	0.00566993	1	-0.254808	0
OG0002784	AT4G26070.1	Ara1	1525	2370	1540	623	27	15	2	12	0	0	1	1	1	0.023511	0
OG0002789	AT1G77660.1	variable	2098	2545	2105	825	23	17	1	12	0	0	1	1	1	0.02019	0
OG0002790	AT5G57720.1	Ara1	1500	1540	1495	25	70	5	23	56	14	1.25	-0.25	0.787036	1	-0.0333333	0
OG0002793	AT3G17430.1	Ara1	1874	1875	1875	22	4	31	20	5	12	1.70323	-0.703226	0.408823	1	-0.120977	0
OG0002794	AT2G24690.1	Ara1	3884	5795	3780	112	186	24	46	126	32	1.18519	-0.185185	0.655463	1	-0.0260611	0
OG0002796	AT1G61340.1	Ara1	925	5150	925	44	31	17	16	5	9	4.65882	-3.65882	0.0141139	1	-0.364169	0
OG0002799	AT3G23900.1	Ara1	4935	4965	4925	66	183	41	93	35	31	1.42578	-0.425784	0.271357	1	-0.0865194	0
OG0002800	AT3G44170.1	variable	773	790	765	89	24	17	9	4	0	0	1	1	1	0.160377	0
OG0002801	AT5G25760.1	variable	785	790	785	3	4	11	27	3	15	1.36364	-0.363636	1	1	-0.047619	0
OG0002802	AT5G42210.1	variable	2190	2200	2190	40	94	20	36	31	21	1.35484	-0.354839	0.555522	1	-0.0705128	0
OG0002803	AT1G03910.1	variable	3360	3360	3360	27	27	18	54	21	42	3	-2	0.0102868	1	-0.266667	0
OG0002804	AT4G02750.1	Ara1	3905	3920	3895	74	53	44	65	26	36	2.32867	-1.32867	0.0112737	1	-0.207764	0
OG0002805	AT3G55080.1	Ara1	2315	2705	2315	57	53	30	18	32	16	0.95	0.05	1	1	0.0114943	0
OG0002806	AT5G14620.1	Ara1	3130	3185	3100	31	70	21	69	66	66	1.47619	-0.47619	0.255417	1	-0.0961538	0
OG0002807	AT3G62800.2	Ara1	1775	1775	1765	27	57	11	24	32	20	1.53409	-0.534091	0.378014	1	-0.0951417	0
OG0002808	AT2G27350.2	Ara1	2526	2705	2525	34	48	20	40	18	23	2.17222	-1.17222	0.0955223	1	-0.190605	0
OG0002809	AT3G01610.1	variable	4058	5085	4085	1596	57	40	3	13	1	3.06923	-2.06923	0.297905	1	-0.0469787	0
OG0002812	AT5G52620.1	variable	1872	2010	1845	52	196	11	31	80	11	0.65	0.35	0.359663	1	0.0537241	0
OG0002815	AT4G30220.1	variable	440	515	440	3	5	5	9	0	8	Inf	#NAME?	0.2	1	-0.375	0
OG0002816	AT4G10000.1	Ara1	1665	1745	1665	59	38	14	19	13	12	3.89011	-2.89011	0.00809358	1	-0.288219	0
OG0002820	AT1G10330.1	Ara1	2335	2335	2335	44	60	21	47	18	21	2.44444	-1.44444	0.0394185	1	-0.215385	0
OG0002821	AT1G69640.1	variable	1300	1300	1295	7	12	29	23	4	10	0.603448	0.396552	0.475774	1	0.0912698	0
OG0002822	AT4G26485.1	variable	1044	1170	1045	24	25	8	11	11	11	3	-2	0.0834384	1	-0.25	0
OG0002826	AT4G27920.1	variable	915	990	915	12	66	5	42	24	10	1	0	1	1	0	0
OG0002827	AT3G60120.1	variable	2700	2720	2695	30	31	31	38	23	47	1.97756	-0.97756	0.0745027	1	-0.163232	0
OG0002830	AT5G60440.1	variable	1480	1800	1420	487	24	18	1	13	1	2.0812	-1.0812	0.410761	0	-0.035785	0
OG0002832	AT5G38360.1	variable	1683	4830	1685	73	55	32	31	5	5	2.28125	-1.28125	0.287541	0	-0.195238	0
OG0002835	AT1G62690.1	Ara1	730	1000	725	32	46	3	7	21	4	2.03175	-1.03175	0.436008	1	-0.0742857	0
OG0002838	AT4G27190.1	variable	4924	5310	4860	42	90	23	33	579	205	0.646542	0.353458	0.110729	0	0.0923666	0
OG0002839	AT5G25560.1	variable	1539	1540	1540	18	32	21	36	7	6	0.734694	0.265306	0.752336	1	0.0769231	0
OG0002843	AT5G59870.1	variable	750	755	745	9	12	2	28	7	12	7.71429	-6.71429	0.0258871	1	-0.449761	0
OG0002845	AT1G02190.2	Ara1	3135	3145	3135	40	50	32	38	42	30	0.892857	0.107143	0.866434	1	0.0277778	0
OG0002847	AT4G01230.1	variable	1209	1230	1210	31	26	17	9	15	20	2.43137	-1.43137	0.0732522	0	-0.217262	0
OG0002851	AT1G28395.1	Ara1	475	725	475	6	3	6	7	8	10	1.25	-0.25	1	1	-0.0555556	0
OG0002852	AT3G53930.1	Ara1	3555	3560	3545	31	27	27	39	28	32	1.31217	-0.312169	0.580861	1	-0.0678161	0
OG0002855	AT3G18400.1	Ara1	1570	1580	1555	18	18	8	23	11	16	3.27273	-2.27273	0.0542111	1	-0.2849	0
OG0002859	AT1G22830.1	Ara1	3514	3820	3500	79	94	19	31	100	39	1.62158	-0.621579	0.167051	1	-0.086698	0
OG0002861	AT4G37150.1	variable	1279	1285	1280	25	31	8	14	24	18	2.34375	-1.34375	0.142037	1	-0.186147	0
OG0002863	AT3G02130.1	Ara1	5755	5775	5755	66	77	63	91	43	70	1.70543	-0.705426	0.0519507	1	-0.131097	0
OG0002869	AT3G49660.1	Ara1	1585	1585	1585	21	32	15	39	21	14	0.933333	0.0666667	1	1	0.0166667	0
OG0002878	AT1G64280.1	Ara1	2965	2995	2955	55	122	36	63	55	29	0.805556	0.194444	0.533147	1	0.0503663	1
OG0002879	AT3G42670.1	Ara1	6280	6315	6270	126	84	115	76	73	64	0.960572	0.0394282	0.91473	1	0.0100251	0
OG0002880	AT2G24280.1	variable	2469	2480	2470	46	25	19	28	19	24	3.05817	-2.05817	0.00874822	1	-0.265832	0
OG0002881	AT1G13700.1	Ara1	1340	1580	1340	22	12	16	13	13	21	2.22115	-1.22115	0.106069	1	-0.196594	0
OG0002884	AT5G04900.1	Ara1	1740	1745	1740	16	39	16	39	13	15	1.15385	-0.153846	0.801704	1	-0.0357143	0
OG0002886	AT5G10320.1	Ara1	2015	2270	2015	33	67	14	39	26	18	1.63187	-0.631868	0.282112	1	-0.111219	0
OG0002887	AT3G25040.1	variable	1075	1075	1075	8	4	25	23	4	8	0.64	0.36	0.704981	1	0.0909091	0
OG0002889	AT1G76480.1	variable	985	995	985	13	29	6	19	25	13	1.12667	-0.126667	1	1	-0.0263158	0
OG0002891	AT1G65720.1	Ara1	900	4185	880	17	16	9	13	17	15	1.66667	-0.666667	0.425769	1	-0.122596	0
OG0002892	AT1G08680.1	Ara1	3245	3280	3245	60	99	14	38	54	28	2.22222	-1.22222	0.046143	1	-0.152274	0
OG0002893	AT2G32700.1	Ara1	3935	3940	3930	26	39	24	60	32	53	1.79427	-0.794271	0.109911	1	-0.143529	0
OG0002895	AT1G13610.1	variable	1790	1800	1790	25	34	16	25	30	12	0.625	0.375	0.358813	1	0.10453	0
OG0002897	AT5G14800.1	Ara1	1380	1380	1380	17	7	9	22	8	30	7.08333	-6.08333	0.00059237	0	-0.44332	0
OG0002899	AT5G45520.1	Ara1	5833	6165	5665	88	176	52	45	116	12	0.175066	0.824934	6.29947e-08	0	0.277679	0
OG0002901	AT2G46410.1	variable	469	470	470	6	1	6	8	2	4	2	-1	0.638009	1	-0.166667	0
OG0002902	AT2G30410.1	variable	565	685	565	5	13	10	10	2	4	1	0	1	1	0	0
OG0002906	AT1G58250.1	Ara1	13033	13120	13035	307	132	199	141	95	115	1.8675	-0.867495	0.000190708	1	-0.154338	0
OG0002907	AT5G66450.1	Ara1	1430	1430	1415	34	34	17	21	11	21	3.81818	-2.81818	0.00632455	1	-0.322917	0
OG0002909	AT1G62310.1	Ara1	4416	4810	4390	126	198	39	59	102	43	1.36199	-0.361991	0.247301	1	-0.0601881	0
OG0002911	AT5G08470.1	variable	5650	5705	5585	60	66	34	62	56	67	2.11134	-1.11134	0.00906103	1	-0.183013	0
OG0002912	AT3G08840.2	Ara1	2595	4685	2590	20	48	15	31	39	24	0.820513	0.179487	0.671629	1	0.047619	0
OG0002913	AT5G45250.1	variable	6083	6925	6085	89	228	44	91	62	46	1.50073	-0.500733	0.142134	1	-0.0950989	0
OG0002914	AT1G60620.1	Ara1	1925	2130	1925	33	50	15	27	38	14	0.810526	0.189474	0.664744	1	0.0432692	0
OG0002915	AT2G27600.1	Ara1	2175	2175	2175	3	9	23	28	1	29	3.78261	-2.78261	0.327684	0	-0.0820513	0
OG0002919	AT5G43290.1	variable	1369	1660	1355	63	54	13	12	28	13	2.25	-1.25	0.101666	0	-0.146021	0
OG0002921	AT5G37510.1	variable	3725	3860	3725	45	24	72	53	10	43	2.6875	-1.6875	0.0131313	1	-0.195936	0
OG0002922	AT3G25940.1	Ara1	595	595	595	8	18	5	10	6	10	2.66667	-1.66667	0.272303	1	-0.240385	0
OG0002923	AT4G18740.1	Ara1	1225	1240	1210	38	33	11	13	17	8	1.62567	-0.625668	0.408282	1	-0.0955102	1
OG0002927	AT4G24840.1	variable	3780	4350	3780	38	38	26	47	33	49	2.17016	-1.17016	0.0298459	1	-0.191311	0
OG0002929	AT3G13410.1	variable	1605	1610	1605	14	76	4	71	17	10	2.05882	-1.05882	0.343022	1	-0.148148	0
OG0002931	AT4G22758.1	variable	1274	1300	1275	47	21	16	17	33	17	1.51326	-0.513258	0.405305	1	-0.0860317	0
OG0002932	AT1G80740.1	Ara1	3950	4015	3930	130	155	30	70	167	81	2.1018	-1.1018	0.00208396	1	-0.139113	0
OG0002933	AT1G65270.2	Ara1	1459	1500	1460	44	13	25	22	5	9	3.168	-2.168	0.0737784	1	-0.280538	0
OG0002935	AT5G19330.1	variable	3550	3555	3550	19	16	24	40	13	48	2.92308	-1.92308	0.0175837	1	-0.228746	0
OG0002936	AT4G36590.1	Ara1	1240	1260	1235	22	103	11	29	30	6	0.4	0.6	0.162047	0	0.166667	0
OG0002937	AT3G55530.1	Ara1	1365	1365	1360	17	9	7	27	7	14	4.85714	-3.85714	0.0174117	1	-0.375	0
OG0002938	AT3G16320.1	variable	3638	3640	3580	59	76	16	53	60	29	1.78229	-0.782292	0.117397	1	-0.112509	0
OG0002942	AT1G74750.1	Ara1	4275	4420	4275	64	53	29	56	39	41	2.32007	-1.32007	0.00850291	1	-0.200672	0
OG0002943	AT2G23680.1	variable	943	950	940	28	86	8	16	35	5	0.5	0.5	0.362591	1	0.0972222	0
OG0002945	AT1G07130.1	Ara1	800	800	790	13	31	6	18	15	8	1.15556	-0.155556	1	1	-0.0320366	0
OG0002946	AT5G22860.1	variable	2508	2530	2510	56	60	19	45	41	31	2.2285	-1.2285	0.0251821	1	-0.177222	0
OG0002947	AT5G06740.1	variable	3258	3275	3245	42	56	7	52	51	48	5.64706	-4.64706	5.31557e-05	0	-0.341991	0
OG0002949	AT5G52790.1	Ara1	2499	2500	2495	53	61	22	54	30	26	2.08788	-1.08788	0.0662833	1	-0.170952	0
OG0002950	AT5G23650.1	Ara1	1683	1710	1680	46	123	6	17	57	13	1.74854	-0.748538	0.324181	1	-0.0703297	0
OG0002952	AT2G41710.2	Ara1	2115	2150	2115	19	23	24	27	10	15	1.1875	-0.1875	0.8028	1	-0.0418605	0
OG0002953	AT2G29070.1	Ara1	1400	1565	1390	22	15	14	26	14	20	2.2449	-1.2449	0.150696	1	-0.199346	0
OG0002954	AT4G36220.1	variable	2600	2600	2600	19	15	34	57	17	39	1.28201	-0.282007	0.683978	1	-0.0549191	0
OG0002955	AT3G03770.1	Ara1	4010	4010	4010	41	46	37	52	24	35	1.61599	-0.615991	0.226403	1	-0.118861	0
OG0002958	AT1G16560.3	variable	1710	1855	1710	28	15	15	19	17	26	2.8549	-1.8549	0.0302578	1	-0.255814	0
OG0002959	AT1G79270.1	Ara1	2640	2645	2625	40	58	21	38	31	29	1.78187	-0.781874	0.141651	1	-0.139071	0
OG0002960	AT1G51310.1	Ara1	2485	2545	2485	70	45	30	42	17	17	2.33333	-1.33333	0.039844	1	-0.2	0
OG0002961	AT4G39150.1	Ara1	1725	1725	1720	16	13	9	29	22	27	2.18182	-1.18182	0.144968	1	-0.19102	0
OG0002962	AT4G32420.1	Ara1	4184	4595	4080	75	83	23	43	58	49	2.75487	-1.75487	0.00119909	1	-0.22325	0
OG0002963	AT3G06880.1	Ara1	6302	6365	6285	110	103	28	88	61	64	4.12178	-3.12178	1.72908e-07	1	-0.309101	0
OG0002965	AT2G29890.1	Ara1	4544	4690	4545	89	90	41	57	53	37	1.51542	-0.515416	0.154238	1	-0.0957265	0
OG0002966	AT3G62230.1	Ara1	2303	2345	2305	80	205	21	45	172	26	0.575858	0.424142	0.0944766	1	0.0766077	0
OG0002967	AT3G13990.1	Ara1	4240	4305	4235	71	82	30	42	91	48	1.24835	-0.248352	0.486044	1	-0.048294	0
OG0002968	AT4G38670.1	variable	1405	1535	1405	18	71	11	33	11	19	2.82645	-1.82645	0.0698487	1	-0.254023	0
OG0002969	AT3G20650.2	variable	1850	1850	1850	15	15	20	16	5	23	3.45	-2.45	0.0555897	1	-0.25	0
OG0002972	AT2G10440.1	Ara1	4627	5945	4475	284	301	35	30	196	26	1.07638	-0.0763848	0.784204	1	-0.00739925	0
OG0002974	AT1G48200.1	variable	590	730	590	15	21	2	15	4	4	7.5	-6.5	0.0592885	1	-0.382353	0
OG0002975	AT4G14970.1	variable	7418	7530	7275	20	64	4	11	3	2	3.33333	-2.33333	0.26926	0	-0.233333	0
OG0002978	AT4G17860.1	Ara1	1777	1800	1780	47	98	14	30	33	16	1.62771	-0.627706	0.286829	1	-0.0970224	0
OG0002979	AT3G08947.1	variable	3285	4365	3285	37	45	33	71	15	18	1.34545	-0.345455	0.530929	1	-0.074026	0
OG0002984	AT4G00590.1	Ara1	2039	2040	2035	46	28	24	23	26	32	2.35897	-1.35897	0.0207539	1	-0.208867	0
OG0002985	AT1G58230.1	variable	13019	13025	13020	277	136	216	150	48	89	2.3778	-1.3778	1.25723e-05	1	-0.211501	0
OG0002989	AT4G38870.1	Ara1	2125	2200	1760	18	44	3	11	32	13	2.4375	-1.4375	0.234484	0	-0.146032	0
OG0002990	AT4G26190.1	Ara1	5285	5570	4665	56	581	7	62	57	18	2.52632	-1.52632	0.0746771	1	-0.128889	0
OG0002991	AT5G66640.1	variable	2250	2510	2200	39	120	17	36	44	14	0.729947	0.270053	0.529911	1	0.0621921	0
OG0003000	AT5G38140.1	variable	975	1560	965	34	66	5	13	117	11	0.639316	0.360684	0.533459	1	0.0422676	0
OG0003002	AT4G02850.1	variable	1529	1600	1530	52	97	14	38	50	19	1.41143	-0.411429	0.428342	1	-0.0632411	0
OG0003004	AT1G68310.1	variable	795	860	795	5	7	6	25	9	6	0.555556	0.444444	0.692166	1	0.145455	0
OG0003006	AT2G32788.1	variable	320	340	320	6	18	2	10	13	2	0.461538	0.538462	0.588933	1	0.116667	0
OG0003012	AT5G40820.1	variable	13509	15755	13510	180	175	134	149	98	94	1.28846	-0.288456	0.197372	1	-0.0628317	0
OG0003015	AT5G51870.1	variable	1035	1150	1035	17	20	16	12	22	11	0.53125	0.46875	0.316698	1	0.151515	0
OG0003018	AT1G73890.1	variable	965	1025	965	13	19	5	16	10	7	1.82	-0.82	0.488676	1	-0.133987	0
OG0003020	AT3G12510.1	variable	865	970	865	9	48	7	11	27	5	0.238095	0.761905	0.0734562	0	0.28125	0
OG0003022	AT3G13060.2	Ara1	2755	3340	2755	27	27	15	49	51	26	0.917647	0.0823529	0.842524	1	0.0194805	0
OG0003023	AT3G54540.1	Ara1	3615	3620	3615	20	23	22	60	23	43	1.6996	-0.699605	0.227858	1	-0.127706	0
OG0003025	AT1G18450.1	Ara1	2205	2205	2205	17	11	6	34	8	33	11.6875	-10.6875	3.49904e-05	1	-0.544008	0
OG0003032	AT1G33050.1	Ara1	3462	3700	3450	102	87	41	37	65	23	0.8803	0.1197	0.762555	1	0.0253497	0
OG0003033	AT2G26430.1	Ara1	2080	2105	2080	26	32	16	37	20	38	3.0875	-2.0875	0.00844535	1	-0.27422	0
OG0003035	AT2G43770.1	Ara1	1715	2210	1715	13	3	10	33	9	22	3.17778	-2.17778	0.0538377	1	-0.274895	0
OG0003037	AT3G21490.1	variable	680	690	670	14	13	8	11	13	7	0.942308	0.0576923	1	0	0.0136364	0
OG0003039	AT5G64440.1	Ara1	3036	3255	3035	43	75	28	31	24	29	1.85565	-0.855655	0.103755	1	-0.152804	0
OG0003040	AT2G38580.1	Ara1	2410	2435	2410	51	53	12	19	44	28	2.70455	-1.70455	0.0142145	1	-0.198413	0
OG0003042	AT1G14170.3	Ara1	2270	2295	2245	23	27	23	31	14	43	3.07143	-2.07143	0.0126641	1	-0.254386	0
OG0003044	AT1G47603.1	variable	1964	2005	1955	55	58	23	40	52	27	1.24164	-0.241639	0.608081	1	-0.0469004	0
OG0003045	AT5G14520.1	Ara1	2950	2950	2935	32	20	13	39	32	40	3.07692	-2.07692	0.00724489	0	-0.266667	0
OG0003046	AT1G61140.1	Ara1	6400	6650	6395	169	123	87	75	85	46	1.05125	-0.0512508	0.82211	1	-0.0113013	0
OG0003047	AT5G51960.1	variable	515	520	515	6	2	6	10	4	10	2.5	-1.5	0.421645	1	-0.214286	0
OG0003048	AT1G66520.1	variable	1775	3700	1775	48	26	45	29	11	11	1.06667	-0.0666667	1	0	-0.016129	0
OG0003052	AT5G45480.1	variable	4383	4425	4350	112	185	55	81	59	19	0.655778	0.344222	0.182835	1	0.0857516	0
OG0003053	AT1G61620.1	Ara1	1550	1550	1550	25	12	30	27	5	18	3	-2	0.0734633	1	-0.237154	0
OG0003054	AT1G48175.1	Ara1	910	1325	910	23	12	9	19	8	6	1.91667	-0.916667	0.495237	1	-0.147321	0
OG0003056	AT3G63530.1	Ara1	1240	1370	1215	5	14	8	14	10	22	1.375	-0.375	0.732499	1	-0.0721154	0
OG0003058	AT4G33130.1	Ara1	1110	1125	1110	10	25	12	15	13	12	0.769231	0.230769	0.772482	1	0.0654545	0
OG0003059	AT4G00620.1	variable	1800	1800	1795	28	21	37	25	6	13	1.63964	-0.63964	0.43389	1	-0.11498	0
OG0003063	AT5G27970.1	Ara1	8150	8225	8085	106	68	91	94	50	91	2.12	-1.12	0.00091584	1	-0.183461	0
OG0003064	AT3G13590.1	variable	2562	2875	2415	52	433	7	43	27	7	1.92593	-0.925926	0.366745	0	-0.0872383	0
OG0003065	AT5G40780.1	Ara1	2230	2230	2220	7	28	32	44	6	40	1.45833	-0.458333	0.56028	1	-0.0490524	0
OG0003068	AT1G56210.1	Ara1	1820	1875	1805	69	94	14	30	42	4	0.469388	0.530612	0.289599	1	0.0817182	0
OG0003069	AT4G04790.1	Ara1	4105	4180	4105	154	121	57	72	32	31	2.61732	-1.61732	0.00125262	1	-0.221921	0
OG0003070	AT4G16420.1	Ara1	2435	2435	2435	24	15	27	40	10	24	2.13333	-1.13333	0.119052	1	-0.176471	1
OG0003071	AT2G40520.1	variable	2509	3130	2475	26	101	15	19	140	34	0.420952	0.579048	0.0238389	1	0.170451	0
OG0003072	AT1G70790.2	Ara1	924	1330	925	18	4	8	11	5	8	3.6	-2.6	0.0904558	1	-0.307692	0
OG0003073	AT5G01750.2	Ara1	870	1085	870	7	10	7	19	22	11	0.5	0.5	0.33621	1	0.166667	0
OG0003074	AT5G67500.1	variable	1523	1525	1380	15	10	17	20	16	11	0.606618	0.393382	0.435028	1	0.123843	0
OG0003076	AT1G37150.2	variable	1835	1975	1835	30	28	20	34	8	10	1.875	-0.875	0.281072	1	-0.155556	0
OG0003078	AT3G19670.1	variable	4960	4960	4950	87	88	28	45	121	50	1.28394	-0.283943	0.417176	1	-0.0489194	0
OG0003081	AT4G24140.1	Ara1	2490	2490	2480	28	31	11	40	32	32	2.54545	-1.54545	0.039468	1	-0.217949	0
OG0003082	AT2G26000.1	variable	2304	2495	2300	13	62	11	18	11	7	0.752066	0.247934	0.757361	1	0.0694444	0
OG0003083	AT5G53150.1	Ara1	3630	3780	3415	62	102	21	47	103	37	1.06056	-0.060564	0.876013	1	-0.0112737	0
OG0003086	AT2G46225.1	variable	1490	1530	1490	12	22	17	21	12	16	0.941176	0.0588235	1	1	0.0147783	0
OG0003087	AT3G17950.1	Ara1	1055	1065	1035	27	28	12	26	6	12	4.5	-3.5	0.0197391	1	-0.358974	0
OG0003090	AT5G35410.1	Ara1	2230	2575	2230	18	21	27	33	17	29	1.13725	-0.137255	0.831028	1	-0.0304348	0
OG0003092	AT4G16710.1	variable	880	880	880	38	24	21	11	6	8	2.4127	-1.4127	0.223436	1	-0.215496	0
OG0003094	AT4G30040.1	variable	2131	2200	2135	71	65	11	24	40	22	3.55	-2.55	0.00249818	1	-0.220692	0
OG0003096	AT1G04050.1	Ara1	3669	3735	3645	73	119	16	27	134	49	1.66838	-0.668377	0.130278	1	-0.0879843	0
OG0003100	AT3G11400.1	variable	1470	1605	1470	4	6	22	33	3	27	1.63636	-0.636364	0.692766	0	-0.0538462	0
OG0003101	AT2G47850.1	Ara1	2340	2360	2340	25	17	10	43	13	20	3.84615	-2.84615	0.0139606	1	-0.320346	0
OG0003102	AT3G01310.1	Ara1	5280	5315	5280	17	21	40	74	20	70	1.4875	-0.4875	0.332957	1	-0.0760234	0
OG0003105	AT1G53580.1	Ara1	1470	1495	1470	20	14	9	23	15	23	3.40741	-2.40741	0.0259367	0	-0.294918	0
OG0003106	AT1G55915.1	Ara1	2020	2020	1980	51	46	25	32	35	18	1.04914	-0.0491429	1	1	-0.0106753	0
OG0003110	AT5G14220.1	Ara1	2540	2740	2540	41	42	18	42	24	15	1.42361	-0.423611	0.513235	1	-0.0795306	0
OG0003111	AT4G32470.1	Ara1	610	610	610	6	5	4	10	3	4	2	-1	0.637186	1	-0.171429	0
OG0003112	AT3G56320.1	Ara1	3015	3065	3015	44	81	15	45	49	28	1.67619	-0.67619	0.196397	1	-0.109399	0
OG0003114	AT3G28220.1	variable	1850	1850	1795	39	92	23	29	27	7	0.439614	0.560386	0.111553	0	0.165085	0
OG0003115	AT5G24270.1	Ara1	1110	1305	1110	13	16	14	16	9	12	1.2381	-0.238095	0.776103	1	-0.0529101	0
OG0003117	AT5G18960.1	variable	3940	3945	3930	33	28	26	98	21	80	4.83516	-3.83516	1.06298e-05	1	-0.351401	0
OG0003121	AT5G51190.1	variable	1105	1145	1105	25	31	3	21	15	18	10	-9	0.000384165	1	-0.438312	0
OG0003122	AT1G65070.1	Ara1	4284	4530	4205	136	68	80	49	160	44	0.4675	0.5325	0.000597352	1	0.154684	0
OG0003123	AT4G17616.1	Ara1	3370	3370	3370	36	25	17	13	14	9	1.36134	-0.361345	0.604057	1	-0.0705496	0
OG0003124	AT5G18480.1	Ara1	2685	2690	2685	17	35	23	38	23	26	0.835539	0.164461	0.830586	1	0.0443878	0
OG0003125	AT5G06890.1	variable	330	880	325	7	18	2	10	7	2	1	0	1	0	0	0
OG0003127	AT1G20060.1	Ara1	4849	5275	4790	76	198	31	68	110	35	0.780059	0.219941	0.389497	1	0.0483403	0
OG0003129	AT2G03690.1	variable	1130	1130	1130	18	9	19	22	2	10	4.73684	-3.73684	0.0892571	1	-0.31982	0
OG0003136	AT2G33130.1	Ara1	515	530	505	9	36	5	8	15	6	0.72	0.28	0.721023	1	0.0714286	0
OG0003137	AT3G62770.2	variable	2125	2195	2120	20	12	14	42	23	44	2.73292	-1.73292	0.0211751	1	-0.244952	0
OG0003141	AT3G05040.1	Ara1	6010	6010	5975	80	99	37	67	73	54	1.59941	-0.599408	0.0861896	1	-0.108958	0
OG0003143	AT3G24070.1	variable	1308	1955	1130	28	45	4	8	28	7	1.75	-0.75	0.516721	1	-0.075	0
OG0003145	AT5G06120.1	Ara1	5330	5350	5295	17	17	29	80	20	54	1.58276	-0.582759	0.310321	1	-0.0992949	0
OG0003146	AT5G55100.1	variable	4215	4330	4205	111	82	26	57	47	35	3.17921	-2.17921	0.000292888	1	-0.237048	0
OG0003147	AT3G04470.1	Ara1	3199	3200	3200	24	20	21	50	13	32	2.81319	-1.81319	0.0315257	0	-0.244444	0
OG0003150	AT5G52980.1	variable	1110	1285	1075	39	15	24	13	2	6	4.875	-3.875	0.0631409	0	-0.369048	0
OG0003151	AT1G13750.1	variable	3062	3120	3065	52	70	16	61	36	51	4.60417	-3.60417	1.75899e-05	1	-0.350913	0
OG0003152	AT2G37700.1	Ara1	3064	3110	3060	44	40	33	45	32	22	0.916667	0.0833333	0.858461	1	0.021164	0
OG0003153	AT5G27240.1	Ara1	5519	5640	5415	97	154	17	45	83	28	1.92488	-0.924876	0.0665667	1	-0.103129	0
OG0003154	AT5G44190.1	variable	1930	2005	1925	32	27	36	45	8	24	2.66667	-1.66667	0.0487389	1	-0.220588	0
OG0003157	AT2G22475.1	variable	1495	1545	1495	15	89	11	76	14	10	0.974026	0.025974	1	1	0.00641026	0
OG0003158	AT3G12340.1	Ara1	2495	2550	2490	27	64	13	35	39	19	1.01183	-0.0118343	1	0	-0.00258621	0
OG0003159	AT3G13840.1	Ara1	2550	2555	2545	32	116	11	45	30	15	1.45455	-0.454545	0.487903	1	-0.0775194	0
OG0003160	AT3G03776.1	variable	780	2405	700	20	49	4	14	20	10	2.5	-1.5	0.218212	1	-0.166667	0
OG0003162	AT4G08980.1	Ara1	1585	1585	1585	11	10	16	43	7	22	2.16071	-1.16071	0.254267	1	-0.166028	0
OG0003164	AT4G16690.1	variable	1308	1325	1310	49	40	26	18	15	10	1.25641	-0.25641	0.638248	0	-0.0533333	0
OG0003165	AT1G28960.1	Ara1	1465	1550	1445	14	21	14	21	12	26	2.16667	-1.16667	0.202198	1	-0.184211	0
OG0003166	AT1G02090.1	Ara1	1300	1300	1300	23	6	9	19	18	23	3.26543	-2.26543	0.0195931	1	-0.279726	0
OG0003167	AT4G36960.1	Ara1	1895	1905	1895	21	14	15	26	13	18	1.93846	-0.938462	0.224235	1	-0.163978	0
OG0003168	AT3G59550.1	variable	3466	3585	3455	54	100	23	47	84	37	1.03416	-0.0341615	1	1	-0.00708383	0
OG0003169	AT5G41270.1	Ara1	1290	1300	1260	26	36	14	29	21	9	0.795918	0.204082	0.798205	1	0.05	0
OG0003171	AT3G58810.2	Ara1	2158	2185	2155	29	46	13	33	13	23	3.94675	-2.94675	0.00596536	1	-0.329365	0
OG0003172	AT3G22560.1	Ara1	874	1025	875	23	20	13	22	8	9	1.99038	-0.990385	0.370814	0	-0.168301	0
OG0003174	AT5G52110.1	Ara1	1375	1455	1375	25	18	7	24	20	20	3.57143	-2.57143	0.016372	1	-0.28125	0
OG0003175	AT4G11990.1	Ara1	2503	2565	2465	89	75	18	31	44	20	2.24747	-1.24747	0.0364228	1	-0.144276	0
OG0003176	AT4G27710.1	variable	2590	2620	2575	31	54	35	41	47	22	0.41459	0.58541	0.0151702	1	0.211462	0
OG0003180	AT5G55810.1	Ara1	1190	1195	1190	50	43	22	17	2	2	2.27273	-1.27273	0.586586	1	-0.194444	0
OG0003181	AT1G34150.1	Ara1	2230	2235	2220	53	43	45	41	8	19	2.79722	-1.79722	0.0301032	1	-0.24452	0
OG0003182	AT5G67160.1	variable	2170	5160	2160	29	65	9	35	36	37	3.31173	-2.31173	0.00808775	0	-0.270007	0
OG0003183	AT1G43640.1	variable	2139	2240	2140	111	79	25	35	26	21	3.58615	-2.58615	0.000735551	1	-0.262985	0
OG0003186	AT1G20870.1	Ara1	2315	2465	2315	43	66	11	31	60	33	2.15	-1.15	0.0629376	1	-0.151135	0
OG0003187	AT1G10500.1	Ara1	900	910	890	14	9	4	16	8	14	6.125	-5.125	0.0121614	1	-0.414141	0
OG0003190	AT4G29910.1	Ara1	2670	3140	2670	52	37	18	31	42	44	3.02646	-2.02646	0.00169405	1	-0.254485	0
OG0003192	AT1G78790.1	Ara1	520	765	520	11	6	8	10	0	3	Inf	#NAME?	0.214286	1	-0.578947	0
OG0003195	AT5G23810.1	Ara1	2335	2340	2335	50	96	46	59	21	13	0.672878	0.327122	0.423268	1	0.0968137	0
OG0003197	AT4G18150.1	Ara1	3763	4215	3765	400	179	43	20	88	23	2.43129	-1.43129	0.00278206	1	-0.110142	0
OG0003198	AT5G60590.2	variable	820	1670	820	15	11	14	17	4	5	1.33929	-0.339286	1	1	-0.0727969	0
OG0003201	AT5G40520.2	Ara1	2870	3910	2825	12	107	3	19	8	1	0.5	0.5	1	1	0.0888889	0
OG0003202	AT3G12900.1	Ara1	1785	1845	1785	17	31	15	32	25	15	0.68	0.32	0.47626	0	0.09375	0
OG0003205	AT5G66540.1	Ara1	2620	2720	2595	51	40	24	35	62	26	0.891129	0.108871	0.737019	1	0.0245455	0
OG0003208	AT5G08490.1	variable	4245	4245	4245	55	73	15	42	64	49	2.80729	-1.80729	0.00253758	1	-0.219343	0
OG0003209	AT3G49600.1	variable	5334	5365	5335	65	72	49	74	45	51	1.5034	-0.503401	0.166089	1	-0.101425	0
OG0003210	AT4G26220.1	Ara1	1160	1455	1160	11	17	7	21	11	17	2.42857	-1.42857	0.227081	1	-0.218254	0
OG0003211	AT3G18200.1	Ara1	1265	1795	1265	12	10	23	14	19	18	0.494279	0.505721	0.161294	1	0.170656	0
OG0003212	AT1G27060.1	Ara1	1931	1945	1920	26	39	14	22	46	36	1.45342	-0.453416	0.433686	1	-0.0890244	0
OG0003215	AT1G33390.1	variable	6183	6260	6175	156	141	97	104	71	19	0.430376	0.569624	0.00285394	1	0.172288	0
OG0003217	AT3G47120.1	variable	1761	2005	1510	54	54	11	21	36	8	1.09091	-0.0909091	1	1	-0.0125874	0
OG0003222	AT4G26810.1	variable	530	530	500	7	7	1	10	2	6	21	-20	0.0405594	1	-0.625	0
OG0003223	AT3G05870.1	variable	435	720	435	1	2	5	2	0	2	Inf	#NAME?	1	1	-0.166667	0
OG0003224	AT5G39380.1	Ara1	2534	2540	2530	87	57	37	29	39	27	1.62786	-0.627859	0.147433	1	-0.110704	0
OG0003225	AT5G47790.1	variable	1844	1920	1835	30	37	15	30	24	22	1.83333	-0.833333	0.201785	0	-0.144928	0
OG0003226	AT5G60690.1	Ara1	4210	4215	4210	38	18	38	57	12	67	5.58333	-4.58333	5.43415e-06	0	-0.348101	0
OG0003227	AT5G64870.1	variable	2394	2410	2395	56	18	15	47	13	18	5.16923	-4.16923	0.000451632	1	-0.369378	0
OG0003228	AT2G41330.1	Ara1	2010	2130	1990	35	32	18	27	45	29	1.25309	-0.253086	0.580684	0	-0.0522693	0
OG0003230	AT1G21970.1	variable	1190	1215	1180	17	23	10	18	19	15	1.34211	-0.342105	0.610308	0	-0.0708061	0
OG0003231	AT4G00980.1	variable	2438	2575	2440	93	59	36	24	39	10	0.662393	0.337607	0.343722	1	0.0749881	0
OG0003232	AT4G13460.1	Ara1	3250	3275	3235	79	64	38	55	75	38	1.05333	-0.0533333	0.889049	1	-0.0114969	0
OG0003233	AT3G61950.1	Ara1	1789	1855	1755	31	48	8	29	32	27	3.26953	-2.26953	0.0171609	1	-0.252499	0
OG0003234	AT3G56780.1	variable	2152	2395	2145	29	63	5	19	23	9	2.26957	-1.26957	0.234391	0	-0.134191	0
OG0003235	AT3G48480.1	Ara1	1490	1490	1475	36	37	15	20	23	12	1.25217	-0.252174	0.644397	1	-0.0487395	0
OG0003236	AT1G79590.2	Ara1	1164	1165	1165	14	13	7	13	10	12	2.4	-1.4	0.223143	1	-0.212121	0
OG0003237	AT2G19690.1	Ara1	734	735	735	13	6	2	14	12	11	5.95833	-4.95833	0.039407	1	-0.344928	0
OG0003244	AT3G52905.1	variable	851	860	850	9	7	3	8	3	16	16	-15	0.00194928	1	-0.592105	0
OG0003245	AT4G34520.1	variable	2530	2530	2525	29	45	19	44	29	34	1.78947	-0.789474	0.179393	1	-0.143849	0
OG0003246	AT3G48430.1	variable	6800	7030	6790	87	98	59	77	123	80	0.959074	0.040926	0.911814	1	0.0100209	0
OG0003248	AT4G05520.1	Ara1	2729	2730	2725	42	14	41	62	11	27	2.51441	-1.51441	0.0306962	1	-0.21655	0
OG0003249	AT2G31865.1	Ara1	2610	2675	2610	53	68	20	48	23	26	2.99565	-1.99565	0.00727757	1	-0.25664	0
OG0003251	AT1G16020.1	Ara1	2575	2575	2575	33	54	15	29	37	32	1.9027	-0.902703	0.126054	1	-0.151268	0
OG0003252	AT3G01710.2	Ara1	1955	2130	1950	38	110	18	38	26	11	0.893162	0.106838	1	1	0.0241313	0
OG0003253	AT2G23740.1	Ara1	6875	6985	6865	118	113	52	102	111	79	1.61504	-0.615038	0.036994	1	-0.109907	0
OG0003257	AT5G10650.2	Ara1	2623	2970	2620	48	86	16	47	49	23	1.40816	-0.408163	0.44847	1	-0.0694444	0
OG0003259	AT4G25880.1	Ara1	4305	4320	4300	92	61	56	58	43	48	1.83389	-0.833887	0.0313764	1	-0.149094	0
OG0003260	AT5G11470.1	variable	3554	3735	3225	56	77	16	39	46	23	1.75	-0.75	0.187301	1	-0.111111	0
OG0003262	AT5G63960.1	Ara1	5474	5480	5475	35	35	48	85	19	66	2.53289	-1.53289	0.00802007	1	-0.198157	0
OG0003263	AT4G10310.1	Ara1	2529	2540	2525	79	67	34	41	45	20	1.03268	-0.0326797	1	1	-0.00680735	0
OG0003264	AT4G32030.1	Ara1	1265	1405	1255	14	143	6	43	25	11	1.02667	-0.0266667	1	0	-0.00555556	0
OG0003266	AT1G10800.1	Ara1	590	4645	590	7	17	5	5	8	7	1.225	-0.225	1	1	-0.05	0
OG0003267	AT5G62620.1	Ara1	3405	3405	3400	33	25	24	65	13	39	4.125	-3.125	0.000872563	1	-0.328947	0
OG0003268	AT1G27960.1	Ara1	2694	2855	2685	48	98	11	19	66	21	1.38843	-0.38843	0.541722	1	-0.0549386	0
OG0003269	AT2G46980.2	Ara1	2580	4065	2580	89	73	29	22	40	14	1.07414	-0.0741379	0.85144	1	-0.0134965	0
OG0003270	AT3G54670.1	Ara1	6090	6190	6090	39	88	47	84	59	42	0.590696	0.409304	0.0800402	1	0.13067	0
OG0003271	AT4G25315.1	Ara1	635	635	625	14	10	3	3	8	7	4.08333	-3.08333	0.128281	1	-0.290196	0
OG0003273	AT1G78770.1	Ara1	2715	2715	2715	21	11	21	40	13	29	2.23077	-1.23077	0.119134	1	-0.190476	0
OG0003274	AT5G29000.2	Ara1	1849	2080	1850	33	62	7	37	28	18	3.03061	-2.03061	0.0336589	1	-0.216304	0
OG0003276	AT5G47120.1	variable	1235	1235	1235	16	8	19	33	2	17	7.15789	-6.15789	0.0142839	1	-0.35188	0
OG0003277	AT5G26720.1	Ara1	670	805	665	9	34	3	7	7	2	0.857143	0.142857	1	1	0.0277778	0
OG0003278	AT5G50960.1	variable	1750	1750	1750	18	21	27	51	8	16	1.33333	-0.333333	0.614075	1	-0.0666667	0
OG0003280	AT4G20380.4	variable	920	1015	920	11	12	13	16	8	17	1.79808	-0.798077	0.386845	1	-0.138333	0
OG0003282	AT5G55470.1	Ara1	2645	2650	2645	18	19	36	45	15	38	1.26667	-0.266667	0.676466	1	-0.0503145	0
OG0003283	AT4G31200.1	Ara1	3250	3260	3245	34	29	12	43	15	46	8.68889	-7.68889	5.68095e-07	1	-0.493229	0
OG0003284	AT1G58025.1	variable	2861	2990	2855	100	68	34	56	24	21	2.57353	-1.57353	0.00929247	1	-0.212935	0
OG0003286	AT1G50670.1	Ara1	1040	1040	1040	18	8	18	25	4	11	2.75	-1.75	0.214153	1	-0.233333	0
OG0003287	AT4G33150.1	variable	5320	5320	5310	77	62	37	75	50	74	3.08	-2.08	3.02608e-05	1	-0.272213	0
OG0003289	AT5G50840.2	Ara1	2020	2080	2010	23	21	10	35	22	29	3.03182	-2.03182	0.024844	1	-0.265597	0
OG0003290	AT3G27060.1	variable	1660	1660	1660	17	11	39	54	3	29	4.21368	-3.21368	0.0333351	0	-0.209821	0
OG0003291	AT2G07680.1	Ara1	7015	7215	7010	217	139	90	111	76	77	2.44284	-1.44284	1.42339e-05	1	-0.210108	0
OG0003295	AT5G41780.1	variable	2683	2945	2685	119	88	46	45	24	18	1.94022	-0.940217	0.091192	1	-0.149784	0
OG0003296	AT5G38690.1	Ara1	2860	3015	2860	87	68	51	29	24	18	1.27941	-0.279412	0.587006	0	-0.0590062	0
OG0003297	AT5G49020.1	Ara1	2640	3085	2630	32	61	17	41	23	40	3.27366	-2.27366	0.00406224	1	-0.287982	0
OG0003299	AT2G32980.1	variable	1480	1485	1465	16	15	11	23	12	19	2.30303	-1.30303	0.187516	0	-0.205496	0
OG0003300	AT5G46570.1	Ara1	2443	2445	2445	16	11	32	41	4	21	2.625	-1.625	0.167625	1	-0.173333	0
OG0003302	AT2G36000.1	variable	1665	1690	1655	22	41	7	30	10	18	5.65714	-4.65714	0.00330183	1	-0.401478	0
OG0003303	AT1G53130.1	Ara1	840	845	840	12	11	9	19	11	11	1.33333	-0.333333	0.762554	1	-0.0714286	0
OG0003305	AT1G05410.1	Ara1	2355	2360	2345	28	68	18	31	32	29	1.40972	-0.409722	0.434718	1	-0.0841055	0
OG0003307	AT3G20810.2	Ara1	2090	2090	2090	34	24	12	34	27	19	1.99383	-0.993827	0.185295	1	-0.152174	0
OG0003308	AT3G23255.1	Ara1	1117	1120	1120	26	40	15	21	15	11	1.27111	-0.271111	0.797466	1	-0.0572233	0
OG0003309	AT5G09250.1	Ara1	535	535	535	7	8	5	8	3	2	0.933333	0.0666667	1	1	0.0166667	0
OG0003310	AT3G11930.2	Ara1	995	1025	995	10	15	11	14	11	11	0.909091	0.0909091	1	1	0.0238095	0
OG0003313	AT1G02880.2	Ara1	1325	1435	1325	32	32	11	20	13	18	4.02797	-3.02797	0.00759786	1	-0.324831	0
OG0003316	AT5G56170.1	Ara1	840	855	825	14	27	10	6	24	17	0.991667	0.00833333	1	1	0.00203252	0
OG0003318	AT5G52660.1	Ara1	1650	1670	1650	24	16	8	24	14	14	3	-2	0.0616996	1	-0.25	0
OG0003320	AT1G53200.1	Ara1	3064	3090	3010	69	103	21	25	62	31	1.64286	-0.642857	0.143624	1	-0.1	0
OG0003321	AT1G17040.1	variable	3205	3385	3205	42	50	25	36	48	31	1.085	-0.085	0.865246	1	-0.0192707	0
OG0003322	AT3G22640.1	Ara1	2429	2525	2420	49	71	18	41	112	33	0.802083	0.197917	0.604398	0	0.0410705	0
OG0003323	AT1G17580.1	Ara1	7600	7660	7585	64	96	48	87	72	84	1.55556	-0.555556	0.0837569	1	-0.10989	0
OG0003325	AT3G02600.1	Ara1	1820	1820	1815	12	10	7	21	13	18	2.37363	-1.37363	0.243634	1	-0.212224	0
OG0003326	AT2G37025.1	Ara1	2051	2165	2050	39	39	15	14	49	12	0.636735	0.363265	0.379497	1	0.0810565	0
OG0003327	AT2G46620.1	Ara1	2455	2460	2455	23	35	18	84	20	29	1.85278	-0.852778	0.203739	1	-0.152812	0
OG0003330	AT2G24840.1	variable	1318	2260	1310	18	24	19	31	18	6	0.315789	0.684211	0.0619647	1	0.263514	0
OG0003332	AT4G20330.1	Ara1	1430	1435	1430	22	34	19	24	21	13	0.716792	0.283208	0.493882	1	0.0810617	0
OG0003333	AT2G37260.1	Ara1	2145	2165	2125	14	21	14	29	28	24	0.857143	0.142857	0.816409	1	0.0384615	0
OG0003334	AT1G54217.1	Ara1	510	715	510	12	10	6	7	7	3	0.857143	0.142857	1	1	0.0333333	0
OG0003335	AT4G29870.1	Ara1	860	885	860	17	6	2	17	12	14	9.91667	-8.91667	0.00406927	1	-0.433198	0
OG0003338	AT1G25470.1	variable	1434	1460	1410	24	42	9	17	48	11	0.611111	0.388889	0.430331	1	0.0862866	0
OG0003339	AT4G17640.1	Ara1	1410	1410	1410	14	14	19	14	6	16	1.96491	-0.964912	0.391176	1	-0.151515	0
OG0003340	AT2G46060.1	Ara1	4035	5290	4035	50	42	19	57	62	48	2.03735	-1.03735	0.0389513	1	-0.161001	0
OG0003342	AT4G00755.1	Ara1	1885	1965	1870	28	43	14	37	51	22	0.862745	0.137255	0.83494	1	0.0319635	0
OG0003343	AT2G28060.1	Ara1	570	570	570	6	9	7	19	3	7	2	-1	0.669269	1	-0.161538	0
OG0003344	AT3G21640.1	Ara1	1825	1830	1825	33	31	22	42	11	21	2.86364	-1.86364	0.0269536	1	-0.25625	0
OG0003346	AT3G22660.1	Ara1	1465	1465	1465	19	34	18	30	13	15	1.21795	-0.217949	0.803595	0	-0.0492278	0
OG0003348	AT1G48950.1	Ara1	2969	2980	2965	65	58	22	24	18	25	4.10354	-3.10354	0.000412527	1	-0.328522	0
OG0003349	AT3G01100.1	Ara1	3515	3820	3510	21	84	20	44	15	40	2.8	-1.8	0.0201113	1	-0.239468	0
OG0003352	AT4G22720.1	Ara1	1765	1765	1765	21	8	40	34	8	31	2.03437	-1.03438	0.176539	1	-0.139134	0
OG0003353	AT5G05930.1	Ara1	1370	1420	1370	19	25	13	17	8	6	1.09615	-0.0961538	1	1	-0.0223214	0
OG0003354	AT5G38310.1	Ara1	940	1120	940	32	33	9	23	2	8	14.2222	-13.2222	0.00113353	0	-0.580488	0
OG0003357	AT5G56780.1	Ara1	2415	2440	2415	33	69	17	36	29	34	2.27586	-1.27586	0.038348	1	-0.199683	0
OG0003358	AT5G24620.1	Ara1	2100	2100	2030	26	26	11	36	26	35	3.18182	-2.18182	0.011858	1	-0.276473	0
OG0003359	AT2G02220.1	Ara1	5040	5095	5035	77	114	47	100	60	72	1.96596	-0.965957	0.00860373	1	-0.166422	0
OG0003360	AT2G26810.1	Ara1	1280	1295	1235	11	26	8	27	8	14	2.40625	-1.40625	0.216931	1	-0.215311	0
OG0003361	AT3G23640.1	Ara1	4954	5300	4955	104	88	56	94	31	33	1.97696	-0.976959	0.0242867	1	-0.165625	0
OG0003362	AT4G08460.1	Ara1	1369	1415	1370	38	45	11	19	37	14	1.30713	-0.307125	0.646916	1	-0.05002	0
OG0003363	AT2G36740.1	Ara1	1825	1825	1820	25	19	10	27	16	18	2.8125	-1.8125	0.0513936	1	-0.243697	0
OG0003365	AT1G17460.1	Ara1	3018	3260	2985	43	87	22	27	81	31	0.748036	0.251964	0.399653	1	0.0616758	0
OG0003366	AT1G55600.1	Ara1	2425	2475	2380	51	128	15	21	76	19	0.85	0.15	0.698301	0	0.0272727	0
OG0003367	AT1G33060.1	Ara1	3238	3425	3225	74	63	36	46	74	34	0.944444	0.0555556	0.885227	1	0.0124579	0
OG0003368	AT1G32540.3	Ara1	934	985	740	11	14	7	15	29	11	0.596059	0.403941	0.540383	1	0.113889	0
OG0003370	AT3G13810.1	Ara1	2565	2655	2530	37	52	10	31	29	28	3.57241	-2.57241	0.00417352	1	-0.278462	0
OG0003372	AT5G48090.1	Ara1	3382	4255	3295	84	60	11	32	52	11	1.61538	-0.615385	0.350488	1	-0.0588137	0
OG0003375	AT5G43910.2	Ara1	1407	1905	1425	574	36	16	0	10	0	0	1	1	1	0.0271186	0
OG0003376	AT5G06180.1	Ara1	2020	2660	2020	40	57	9	28	38	18	2.10526	-1.10526	0.122313	1	-0.137755	0
OG0003380	AT5G45960.1	Ara1	1875	1875	1875	39	60	15	35	29	12	1.07586	-0.0758621	1	1	-0.0149051	0
OG0003381	AT1G18335.1	Ara1	1346	1465	1345	20	22	7	16	15	14	2.66667	-1.66667	0.103701	1	-0.223499	0
OG0003382	AT4G17486.1	Ara1	1120	1120	1120	25	13	19	16	5	5	1.31579	-0.315789	0.736345	1	-0.0681818	0
OG0003383	AT1G13800.1	Ara1	4415	4635	4375	55	107	16	39	96	31	1.11003	-0.110026	0.862293	1	-0.0187424	0
OG0003384	AT2G22730.1	Ara1	2548	2725	2495	61	41	20	44	39	17	1.32949	-0.329487	0.557684	1	-0.0566578	0
OG0003386	AT1G56553.1	variable	416	600	400	128	26	1	0	4	0	0	1	1	1	0.00775194	0
OG0003390	AT5G08460.1	variable	1925	1930	1920	13	20	24	36	25	29	0.628333	0.371667	0.387108	0	0.111612	0
OG0003396	AT5G51845.1	variable	363	365	365	15	22	2	6	9	1	0.833333	0.166667	1	1	0.0176471	0
OG0003400	AT2G21450.1	variable	4078	4295	4045	37	99	23	31	31	22	1.14165	-0.141655	0.847568	1	-0.031761	0
OG0003406	AT4G32730.2	variable	3880	4975	3880	46	85	21	40	73	27	0.810176	0.189824	0.602095	1	0.0434328	0
OG0003407	AT5G43930.3	variable	3625	3745	3620	126	56	48	39	54	25	1.21528	-0.215278	0.550306	1	-0.0405936	0
OG0003410	AT2G03140.1	variable	8877	11750	8815	3389	248	79	7	41	2	2.09262	-1.09262	0.26118	1	-0.0237319	0
OG0003415	AT4G36050.2	Ara1	2039	3055	2040	39	54	23	24	29	17	0.994003	0.005997	1	1	0.00140252	0
OG0003416	AT2G31270.1	variable	2855	2910	2855	51	83	27	43	46	40	1.64251	-0.642512	0.152458	0	-0.118962	0
OG0003419	AT4G26555.1	variable	1035	1045	1025	23	19	15	16	11	12	1.67273	-0.672727	0.427217	1	-0.127002	0
OG0003420	AT5G53900.2	Ara1	1325	1940	1325	25	11	27	17	6	13	2.00617	-1.00617	0.283058	1	-0.16498	0
OG0003421	AT3G13225.1	Ara1	3855	4450	3835	77	92	21	41	74	29	1.43694	-0.436937	0.327886	1	-0.0672677	0
OG0003422	AT4G14570.1	Ara1	4094	4240	4085	104	79	53	58	33	23	1.36764	-0.367639	0.334439	1	-0.0731347	0
OG0003423	AT2G25740.1	Ara1	2735	2775	2735	41	56	16	39	55	29	1.35114	-0.351136	0.4652	1	-0.0645363	0
OG0003424	AT1G04400.1	Ara1	3060	3060	3060	40	27	48	49	5	14	2.33333	-1.33333	0.199305	1	-0.191388	0
OG0003425	AT1G06700.1	Ara1	1805	1825	1805	17	5	17	30	5	25	5	-4	0.00789546	1	-0.333333	0
OG0003426	AT2G29080.1	Ara1	4045	4070	4045	34	20	67	51	30	73	1.23483	-0.234826	0.546919	0	-0.0453715	0
OG0003427	AT1G63610.1	Ara1	1700	1715	1700	34	24	9	34	14	26	7.01587	-6.01587	5.91003e-05	1	-0.440698	0
OG0003428	AT1G42440.1	variable	3964	3965	3965	97	54	58	81	26	34	2.187	-1.187	0.0137553	0	-0.192473	0
OG0003430	AT4G02195.1	Ara1	1615	1615	1615	29	23	21	27	12	21	2.41667	-1.41667	0.0731644	1	-0.216364	0
OG0003431	AT5G49960.1	Ara1	4118	4250	4120	43	50	46	80	28	47	1.5691	-0.569099	0.205609	1	-0.109813	0
OG0003432	AT4G21190.1	Ara1	1535	3040	1525	15	10	7	19	14	18	2.7551	-1.7551	0.0997933	1	-0.244318	0
OG0003433	AT3G13120.1	variable	955	980	950	2	3	8	21	8	7	0.21875	0.78125	0.210708	0	0.333333	0
OG0003434	AT1G53025.1	Ara1	2715	2985	2710	58	75	22	36	52	18	0.912587	0.0874126	0.854556	1	0.0178571	0
OG0003435	AT4G00170.1	Ara1	1195	1195	1190	21	26	13	21	14	13	1.5	-0.5	0.602667	1	-0.0991285	0
OG0003436	AT1G47290.2	variable	1910	2195	1910	43	22	34	40	12	9	0.948529	0.0514706	1	1	0.012987	0
OG0003437	AT2G23200.1	Ara1	4169	4195	4145	70	196	28	89	104	51	1.22596	-0.225962	0.489586	0	-0.043318	0
OG0003438	AT1G03920.1	Ara1	2845	2860	2845	33	35	17	39	30	25	1.61765	-0.617647	0.318723	1	-0.114545	0
OG0003439	AT4G03110.1	Ara1	2203	2230	2205	24	19	20	29	13	19	1.75385	-0.753846	0.254107	1	-0.139205	0
OG0003440	AT5G57170.1	variable	575	575	575	4	4	7	6	1	14	8	-7	0.127926	1	-0.29697	0
OG0003441	AT3G15010.2	variable	2020	2140	1995	19	10	14	25	101	82	1.10184	-0.101839	0.850804	0	-0.023845	0
OG0003442	AT1G77620.1	variable	5754	5815	5735	115	128	39	66	112	42	1.10577	-0.105769	0.795862	1	-0.0194805	0
OG0003443	AT2G37080.1	variable	2915	2920	2915	48	25	18	37	43	52	3.22481	-2.22481	0.000664256	1	-0.274641	0
OG0003444	AT2G33490.1	Ara1	3115	3235	3110	32	40	13	37	14	41	7.20879	-6.20879	6.91805e-06	1	-0.456566	0
OG0003445	AT3G20820.1	Ara1	1826	1995	1825	16	23	33	53	2	14	3.39394	-2.39394	0.19753	0	-0.201531	0
OG0003446	AT4G29840.1	Ara1	2630	2650	2625	20	9	29	55	9	37	2.83525	-1.83525	0.0280069	1	-0.212511	0
OG0003447	AT2G38560.1	variable	1890	3830	1890	22	20	14	25	24	31	2.02976	-1.02976	0.134324	0	-0.174747	0
OG0003448	AT5G01660.1	Ara1	3275	3885	3275	74	88	20	32	37	21	2.1	-1.1	0.0595132	1	-0.149303	0
OG0003449	AT3G58630.1	Ara1	1605	1615	1605	28	18	21	25	15	13	1.15556	-0.155556	0.814247	1	-0.0357143	0
OG0003450	AT1G48460.1	variable	1700	1720	1685	38	37	24	28	8	10	1.97917	-0.979167	0.279599	1	-0.168459	0
OG0003451	AT1G67210.1	Ara1	2025	2465	2015	45	40	14	19	37	16	1.38996	-0.389961	0.523221	1	-0.0645987	0
OG0003452	AT2G46800.2	variable	1990	2010	1990	11	21	17	22	14	43	1.98739	-0.987395	0.206995	0	-0.147243	0
OG0003456	AT1G04300.3	Ara1	5368	5430	5330	82	97	26	48	110	63	1.80629	-0.806294	0.035064	1	-0.123421	0
OG0003457	AT1G60420.1	Ara1	2890	2995	2890	79	52	38	25	31	37	2.48132	-1.48132	0.00500822	1	-0.219331	0
OG0003458	AT5G66990.1	variable	1384	1395	1380	24	54	13	19	23	8	0.64214	0.35786	0.441848	0	0.0932868	0
OG0003459	AT2G29450.1	variable	1120	1125	1120	19	29	16	22	12	9	0.890625	0.109375	1	1	0.0285714	0
OG0003460	AT2G04025.1	Ara1	550	555	545	21	15	5	4	3	5	7	-6	0.0314456	1	-0.432692	0
OG0003461	AT2G17090.1	variable	2326	2930	2325	48	98	31	40	51	21	0.637571	0.362429	0.231134	1	0.100738	0
OG0003463	AT1G47980.1	variable	1575	1605	1575	26	56	30	36	12	10	0.722222	0.277778	0.617299	0	0.0811688	0
OG0003464	AT1G78460.1	Ara1	1095	1095	1090	19	35	10	13	43	7	0.309302	0.690698	0.0468467	0	0.204828	0
OG0003465	AT4G18070.1	Ara1	1310	1430	1275	23	29	13	23	35	14	0.707692	0.292308	0.487964	1	0.0753968	0
OG0003466	AT2G19110.1	variable	5860	6625	5850	88	155	55	109	102	64	1.00392	-0.00392157	1	0	-0.000926784	0
OG0003468	AT2G21370.1	Ara1	2390	2740	2385	60	31	27	30	16	31	4.30556	-3.30556	0.000123053	1	-0.34923	0
OG0003469	AT3G19760.1	variable	2040	2040	2040	11	14	13	36	12	25	1.76282	-0.762821	0.417707	0	-0.134009	0
OG0003471	AT1G18410.1	Ara1	5723	6015	5010	92	96	33	73	71	46	1.80623	-0.806231	0.0395898	1	-0.129162	0
OG0003472	AT2G22720.1	variable	1699	2930	1660	44	53	5	18	37	12	2.85405	-1.85405	0.107633	0	-0.142857	0
OG0003473	AT2G46870.1	variable	1549	1615	1550	24	29	8	26	26	23	2.65385	-1.65385	0.0622546	1	-0.219388	0
OG0003474	AT1G80500.1	variable	675	675	675	1	26	6	14	1	8	1.33333	-0.333333	1	1	-0.031746	0
OG0003475	AT2G30990.2	Ara1	2966	3085	2930	59	90	24	33	45	19	1.03796	-0.037963	1	1	-0.00771837	0
OG0003476	AT5G05570.1	Ara1	5619	5620	5520	75	79	32	64	53	43	1.90153	-0.901533	0.0301305	1	-0.148851	0
OG0003477	AT4G21880.1	variable	4215	4450	4185	79	178	29	43	87	28	0.876734	0.123266	0.758991	1	0.0250403	0
OG0003478	AT1G73980.1	Ara1	3215	3215	3215	15	14	20	49	12	44	2.75	-1.75	0.035912	1	-0.214286	0
OG0003479	AT1G22750.4	Ara1	1219	1280	1220	26	21	11	17	10	6	1.41818	-0.418182	0.749553	1	-0.0777027	0
OG0003480	AT3G20475.1	Ara1	4035	4035	4035	46	58	28	89	22	44	3.28571	-2.28571	0.000746199	1	-0.288288	0
OG0003481	AT2G43110.1	variable	1440	1440	1405	32	33	14	21	28	19	1.55102	-0.55102	0.387577	1	-0.0999075	0
OG0003482	AT2G47240.1	variable	3300	3310	3300	22	27	29	42	17	38	1.69574	-0.69574	0.228925	1	-0.122282	0
OG0003483	AT3G54350.1	Ara1	3510	3595	3490	42	57	20	41	58	37	1.33966	-0.339655	0.497317	1	-0.066893	0
OG0003485	AT5G09995.3	Ara1	1025	1285	1020	20	30	7	16	18	4	0.634921	0.365079	0.732456	1	0.0774411	0
OG0003486	AT5G40670.1	Ara1	1350	1485	1350	15	46	18	22	12	11	0.763889	0.236111	0.786375	1	0.0671937	0
OG0003487	AT4G32630.2	Ara1	3135	3240	3135	41	74	11	30	70	25	1.33117	-0.331169	0.551184	1	-0.0516194	0
OG0003488	AT3G24350.1	variable	1735	1760	1725	19	40	12	21	24	22	1.45139	-0.451389	0.487956	0	-0.0911641	0
OG0003489	AT2G36730.1	variable	2505	2535	2505	59	32	13	36	32	36	5.10577	-4.10577	1.78378e-05	0	-0.348856	0
OG0003490	AT3G21810.1	Ara1	2185	2215	2135	57	77	6	33	34	10	2.79412	-1.79412	0.0962003	1	-0.132035	0
OG0003491	AT1G27750.1	Ara1	5375	5415	5375	75	77	38	65	64	50	1.54194	-0.541941	0.134332	1	-0.102313	0
OG0003492	AT1G05900.2	Ara1	1568	2100	1555	23	79	5	16	43	9	0.962791	0.0372093	1	1	0.00549451	0
OG0003493	AT2G17265.1	variable	1850	1850	1850	21	10	29	32	6	19	2.2931	-1.2931	0.201464	1	-0.18	0
OG0003494	AT1G70410.2	variable	1290	1520	1290	13	7	20	23	19	18	0.615789	0.384211	0.346078	1	0.119574	0
OG0003495	AT5G01600.1	variable	1275	1275	1270	16	22	8	23	15	13	1.73333	-0.733333	0.402839	0	-0.130952	0
OG0003496	AT5G26920.1	variable	2815	2905	2815	77	167	19	68	58	23	1.60708	-0.607078	0.21549	0	-0.086034	0
OG0003498	AT1G04080.1	Ara1	3840	4150	3840	49	59	19	47	52	55	2.72773	-1.72773	0.00278297	1	-0.234607	0
OG0003499	AT1G49870.1	variable	4140	4310	4130	14	34	5	1	15	5	0.933333	0.0666667	1	0	0.0131579	0
OG0003502	AT4G16970.1	Ara1	4440	4595	4420	247	140	59	48	52	11	0.885593	0.114407	0.860469	1	0.0182073	0
OG0003503	AT4G30000.1	Ara1	2770	2775	2770	46	42	16	58	26	34	3.75962	-2.75962	0.000842057	1	-0.308602	1
OG0003504	AT3G22150.1	Ara1	4100	4120	4100	73	62	48	75	27	45	2.53472	-1.53472	0.00282276	1	-0.228306	0
OG0003505	AT4G16830.3	Ara1	1775	1795	1765	98	24	35	13	7	7	2.8	-1.8	0.115084	1	-0.236842	0
OG0003508	AT1G24540.1	variable	2610	2620	2610	52	37	32	40	26	32	2	-1	0.0590001	0	-0.170772	0
OG0003509	AT3G14890.1	Ara1	3469	4005	3405	40	190	21	78	69	17	0.469289	0.530711	0.0564056	1	0.146588	0
OG0003510	AT2G06530.1	Ara1	1125	1125	1125	11	4	17	32	3	12	2.58824	-1.58824	0.308354	0	-0.192857	0
OG0003511	AT5G16550.1	variable	1244	1995	1245	12	16	10	24	11	13	1.41818	-0.418182	0.768311	0	-0.0871212	0
OG0003512	AT1G22700.2	Ara1	1505	1505	1480	12	10	6	21	7	26	7.42857	-6.42857	0.00225021	1	-0.454545	0
OG0003513	AT1G80650.1	Ara1	989	1145	965	16	35	5	9	26	11	1.35385	-0.353846	0.76361	1	-0.0592021	0
OG0003514	AT3G61710.1	Ara1	2585	2605	2575	23	14	26	50	34	35	0.910633	0.0893665	0.852964	1	0.0233659	0
OG0003515	AT1G43650.1	variable	1714	1720	1715	38	39	29	44	10	13	1.70345	-0.703448	0.335545	0	-0.132382	0
OG0003517	AT1G18480.1	variable	1954	2170	1955	28	24	20	30	20	31	2.17	-1.17	0.0713518	1	-0.191176	0
OG0003519	AT5G57110.1	Ara1	5370	5525	5370	25	52	45	87	45	75	0.925926	0.0740741	0.876557	1	0.0178571	0
OG0003520	AT5G60250.1	variable	3274	3370	3240	70	129	14	47	74	27	1.82432	-0.824324	0.112304	0	-0.10066	0
OG0003521	AT2G01830.2	Ara1	5284	5435	5260	54	33	59	80	29	85	2.68264	-1.68264	0.000559872	1	-0.22349	0
OG0003522	AT4G13410.1	variable	2685	2700	2685	68	49	40	35	51	34	1.13333	-0.133333	0.76572	1	-0.0296296	0
OG0003523	AT5G42250.1	Ara1	1950	2045	1950	43	32	43	46	6	16	2.66667	-1.66667	0.0915637	1	-0.227273	0
OG0003524	AT3G46220.1	variable	4020	4020	4020	118	54	55	56	19	18	2.03254	-1.03254	0.0585378	1	-0.168567	0
OG0003529	AT4G18975.1	Ara1	1435	1440	1435	51	29	29	29	22	8	0.639498	0.360502	0.375306	1	0.0958333	0
OG0003530	AT5G01760.1	variable	2710	2870	2685	79	69	19	31	61	37	2.522	-1.522	0.0068959	0	-0.183673	0
OG0003531	AT4G18040.1	variable	1174	1175	1175	20	21	17	16	16	18	1.32353	-0.323529	0.637566	0	-0.0699523	1
OG0003532	AT1G72550.2	Ara1	2990	2990	2955	31	24	29	47	57	49	0.918935	0.0810647	0.871737	0	0.0210692	0
OG0003533	AT1G04010.1	Ara1	3165	3165	3165	10	11	19	45	9	41	2.39766	-1.39766	0.110595	1	-0.164828	0
OG0003534	AT5G20730.1	Ara1	5825	6030	5795	66	56	58	73	17	56	3.74848	-2.74848	4.7496e-05	1	-0.299381	0
OG0003536	AT4G28270.1	Ara1	965	1075	960	14	25	10	28	11	11	1.4	-0.4	0.767536	1	-0.0833333	0
OG0003537	AT3G58060.1	variable	2055	2065	2050	19	12	16	32	10	39	4.63125	-3.63125	0.00221733	0	-0.338776	0
OG0003538	AT3G61440.1	variable	1840	1840	1840	15	15	20	30	11	33	2.25	-1.25	0.147474	0	-0.178571	0
OG0003539	AT1G19485.1	Ara1	4075	4125	4065	85	93	22	65	65	32	1.9021	-0.902098	0.0563919	1	-0.124289	0
OG0003540	AT2G02060.1	Ara1	1280	1500	1270	34	37	10	21	23	10	1.47826	-0.478261	0.600258	1	-0.0757576	0
OG0003541	AT3G22200.1	Ara1	2520	2530	2520	20	31	22	39	24	30	1.13636	-0.136364	0.837408	0	-0.031746	0
OG0003542	AT4G11890.1	Ara1	1755	2490	1755	79	67	24	18	15	10	2.19444	-1.19444	0.128069	1	-0.16699	0
OG0003543	AT2G38950.1	variable	3540	3565	3540	62	144	21	56	59	20	1.00081	-0.000807103	1	1	-0.000152509	0
OG0003544	AT4G25730.1	variable	4105	4105	4105	41	67	26	57	55	47	1.34755	-0.347552	0.427623	0	-0.0727246	0
OG0003545	AT2G18940.1	variable	4110	4175	4110	41	56	29	71	21	49	3.29885	-2.29885	0.00114429	1	-0.285714	0
OG0003547	AT1G80710.1	variable	2578	2640	2570	44	107	20	33	42	20	1.04762	-0.047619	1	1	-0.0100806	0
OG0003548	AT1G60640.1	Ara1	1700	1735	1685	38	40	18	17	29	9	0.655172	0.344828	0.48705	1	0.0845865	0
OG0003549	AT2G20470.1	Ara1	2845	2845	2835	26	10	42	50	6	10	1.03175	-0.031746	1	1	-0.00735294	0
OG0003550	AT4G28760.2	Ara1	4620	4635	4620	93	70	26	46	90	63	2.50385	-1.50385	0.00073569	1	-0.193277	0
OG0003552	AT5G41580.1	Ara1	3800	3940	3800	98	86	38	53	42	30	1.84211	-0.842105	0.0617743	0	-0.137255	0
OG0003553	AT5G53760.2	Ara1	2865	2870	2835	20	34	13	54	33	46	2.14452	-1.14452	0.0964044	1	-0.188339	0
OG0003555	AT4G27480.2	Ara1	2103	2105	2105	24	18	18	27	16	39	3.25	-2.25	0.00699808	1	-0.280519	0
OG0003556	AT2G40460.1	variable	2914	2920	2905	25	22	20	36	24	36	1.875	-0.875	0.12044	0	-0.155556	0
OG0003560	AT3G02300.1	variable	2354	2355	2355	37	13	28	30	10	15	1.98214	-0.982143	0.165786	0	-0.169231	0
OG0003561	AT5G23540.1	Ara1	1540	1540	1540	3	1	15	25	1	37	7.4	-6.4	0.092755	1	-0.140351	0
OG0003562	AT5G17410.1	Ara1	3391	3400	3390	39	13	50	52	5	20	3.12	-2.12	0.0370046	1	-0.238202	0
OG0003563	AT2G19570.1	Ara1	1505	1515	1505	20	48	21	39	12	11	0.873016	0.126984	1	1	0.0339343	0
OG0003565	AT3G28760.1	Ara1	2108	2135	2105	72	69	27	41	20	25	3.33333	-2.33333	0.00144827	1	-0.282828	0
OG0003566	AT3G58230.1	Ara1	765	765	765	13	18	4	7	6	5	2.70833	-1.70833	0.408696	0	-0.219251	0
OG0003567	AT3G46200.1	variable	1555	4645	1550	83	56	22	37	12	1	0.314394	0.685606	0.458777	1	0.132601	0
OG0003568	AT5G11260.1	Ara1	840	840	840	15	9	17	17	1	7	6.17647	-5.17647	0.114047	1	-0.34375	0
OG0003569	AT3G25060.1	Ara1	3004	3140	3005	113	84	60	61	23	22	1.80145	-0.801449	0.0866087	0	-0.142068	0
OG0003570	AT3G17880.1	Ara1	1900	1900	1895	37	30	16	31	18	19	2.44097	-1.44097	0.0505661	0	-0.211627	0
OG0003572	AT2G26310.1	variable	1988	2020	1985	38	73	9	33	26	27	4.38462	-3.38462	0.00156427	1	-0.317945	0
OG0003573	AT3G49000.1	variable	2615	2695	2615	43	64	20	36	62	47	1.62984	-0.629839	0.148461	1	-0.113732	0
OG0003574	AT4G25870.1	Ara1	1945	1955	1945	25	13	28	20	13	21	1.44231	-0.442308	0.507767	1	-0.0893452	0
OG0003575	AT1G80850.1	Ara1	1635	1745	1635	16	23	11	29	17	30	2.56684	-1.56684	0.0882218	1	-0.23089	0
OG0003576	AT5G51270.1	variable	4025	4060	4015	34	105	33	67	85	48	0.581818	0.418182	0.0930975	0	0.131635	0
OG0003580	AT5G56090.1	variable	2285	2290	2285	30	19	36	43	6	16	2.22222	-1.22222	0.210068	0	-0.181818	0
OG0003581	AT1G44130.1	variable	2024	2050	2025	76	51	23	26	47	25	1.75763	-0.757632	0.121247	0	-0.114899	0
OG0003582	AT5G58660.1	Ara1	1760	1825	1740	23	29	8	34	30	19	1.82083	-0.820833	0.332021	0	-0.129691	0
OG0003583	AT1G79460.1	Ara1	3925	5700	3925	72	84	37	54	46	30	1.2691	-0.269095	0.534205	1	-0.0552873	0
OG0003584	AT2G02955.1	Ara1	3329	3830	3325	91	100	34	41	82	31	1.01184	-0.0118364	1	1	-0.00233628	0
OG0003585	AT2G38740.1	variable	1220	1245	1220	11	10	11	24	7	13	1.85714	-0.857143	0.366452	0	-0.15	0
OG0003587	AT5G13660.1	Ara1	2680	2780	2640	33	69	6	26	93	35	2.06989	-1.06989	0.143084	1	-0.119591	0
OG0003590	AT2G45630.1	variable	930	1695	880	15	23	8	17	41	8	0.365854	0.634146	0.126479	0	0.184561	0
OG0003592	AT4G24680.1	Ara1	7135	7325	7130	130	158	38	75	100	38	1.3	-0.3	0.353198	1	-0.0491718	0
OG0003593	AT2G13360.2	Ara1	2005	2005	2005	15	11	31	49	4	36	4.35484	-3.35484	0.0178493	1	-0.226087	1
OG0003594	AT4G29660.1	variable	515	520	515	5	4	4	7	0	2	Inf	#NAME?	0.454545	1	-0.555556	0
OG0003595	AT4G26990.1	variable	2369	2400	2360	65	58	13	11	87	19	1.09195	-0.091954	0.846987	0	-0.0125786	0
OG0003596	AT3G46100.1	variable	2430	2480	2415	54	24	44	52	8	9	1.38068	-0.380682	0.603911	0	-0.0804322	0
OG0003597	AT3G23230.1	variable	695	715	695	11	7	6	15	4	8	3.66667	-2.66667	0.13942	0	-0.313725	0
OG0003598	AT4G03020.1	Ara1	2465	2465	2465	11	16	17	30	13	24	1.19457	-0.19457	0.798314	1	-0.0415058	0
OG0003599	AT1G59725.1	Ara1	1657	1695	1610	25	25	24	26	8	11	1.43229	-0.432292	0.593763	1	-0.0891515	0
OG0003600	AT2G47980.1	variable	5490	5535	5490	48	71	35	70	64	56	1.2	-0.2	0.567456	0	-0.0449799	0
OG0003604	AT3G02010.1	Ara1	4125	5885	4110	62	74	39	41	59	47	1.26641	-0.266406	0.480692	1	-0.0572576	0
OG0003606	AT4G34000.1	Ara1	2270	2455	2220	33	75	7	27	37	32	4.07722	-3.07722	0.00341116	1	-0.288768	1
OG0003607	AT5G06160.1	variable	2520	2545	2520	27	37	10	34	27	28	2.8	-1.8	0.0308037	0	-0.238821	0
OG0003608	AT3G22260.1	Ara1	1200	1225	1200	5	9	9	25	4	18	2.5	-1.5	0.266661	1	-0.175325	0
OG0003609	AT2G01200.2	Ara1	955	1200	950	14	77	11	12	16	9	0.715909	0.284091	0.773287	1	0.08	0
OG0003610	AT5G58370.1	Ara1	2230	2350	2225	20	62	16	33	39	22	0.705128	0.294872	0.518963	1	0.0837887	0
OG0003611	AT4G21580.1	variable	1625	1625	1625	38	15	19	31	8	19	4.75	-3.75	0.00212543	0	-0.37037	0
OG0003612	AT1G14980.1	variable	490	490	490	3	3	4	16	2	11	4.125	-3.125	0.289796	0	-0.274725	0
OG0003613	AT3G52050.3	Ara1	2125	2155	2125	24	32	21	26	23	22	1.09317	-0.0931677	1	1	-0.0222222	0
OG0003614	AT2G22250.1	Ara1	2140	2395	2140	26	28	26	39	9	31	3.44444	-2.44444	0.00931475	1	-0.275	0
OG0003615	AT3G59630.1	variable	2455	2465	2455	39	40	24	34	11	20	2.95455	-1.95455	0.0271029	1	-0.264209	0
OG0003617	AT3G20910.1	Ara1	1515	1515	1495	29	27	10	26	18	6	0.966667	0.0333333	1	1	0.00641026	0
OG0003618	AT5G53050.2	variable	1560	1980	1560	23	31	25	29	21	18	0.788571	0.211429	0.668071	0	0.0592949	0
OG0003619	AT1G55940.1	variable	2334	2475	2275	63	43	19	32	20	17	2.81842	-1.81842	0.0174643	1	-0.227752	0
OG0003620	AT1G10050.1	Ara1	5313	5490	5315	67	70	32	61	64	73	2.38818	-1.38818	0.00149104	1	-0.209614	0
OG0003621	AT2G27035.1	Ara1	815	945	810	11	38	4	25	23	16	1.91304	-0.913043	0.367543	1	-0.14359	0
OG0003623	AT2G43010.2	Ara1	2150	2155	2120	29	42	6	20	56	19	1.63988	-0.639881	0.464865	1	-0.0819048	0
OG0003624	AT5G65290.1	variable	3665	3675	3665	22	20	27	42	14	42	2.44444	-1.44444	0.040168	1	-0.19898	0
OG0003625	AT4G33680.1	Ara1	2305	2305	2305	19	15	7	38	14	34	6.59184	-5.59184	0.000491427	1	-0.439103	0
OG0003628	AT4G19120.1	Ara1	3000	3000	3000	52	20	66	44	13	14	0.848485	0.151515	0.830593	1	0.0408035	1
OG0003629	AT2G43040.1	variable	3520	3520	3520	35	23	27	62	10	40	5.18519	-4.18519	0.000100461	1	-0.364516	0
OG0003631	AT5G58190.1	variable	2635	2665	2610	33	52	10	36	49	32	2.1551	-1.1551	0.0762553	1	-0.162504	0
OG0003632	AT4G00300.1	variable	2390	2435	2375	45	50	22	36	32	34	2.1733	-1.1733	0.0355887	1	-0.186793	0
OG0003633	AT2G30820.1	Ara1	2105	2295	2100	75	74	14	21	61	19	1.66862	-0.668618	0.243828	1	-0.0801966	0
OG0003634	AT3G19780.1	Ara1	5295	5455	5285	100	170	32	90	100	60	1.875	-0.875	0.0164783	1	-0.132576	0
OG0003635	AT1G71250.1	Ara1	1870	1975	1870	19	27	22	35	27	23	0.73569	0.26431	0.530319	0	0.0765854	0
OG0003636	AT3G18380.2	Ara1	1740	1745	1740	13	11	9	21	16	18	1.625	-0.625	0.42262	1	-0.120321	0
OG0003639	AT1G24460.1	Ara1	9035	9130	8795	192	159	70	72	138	73	1.45093	-0.450932	0.0701669	1	-0.078796	0
OG0003640	AT4G31980.1	variable	3397	3415	3360	24	21	7	18	19	15	2.70677	-1.70677	0.114428	0	-0.21537	0
OG0003641	AT5G45710.1	Ara1	1725	1725	1715	33	28	27	35	17	10	0.718954	0.281046	0.639797	1	0.0796296	0
OG0003642	AT1G56280.1	Ara1	1000	1095	1000	18	8	5	17	15	11	2.64	-1.64	0.143051	1	-0.205686	1
OG0003643	AT5G53020.1	Ara1	3600	3635	3600	7	13	8	10	3	2	0.583333	0.416667	1	1	0.133333	0
OG0003644	AT4G26020.1	Ara1	1235	1235	1235	15	17	11	16	9	13	1.9697	-0.969697	0.385159	1	-0.167832	0
OG0003645	AT3G24220.1	variable	2885	4425	2880	39	46	15	51	32	20	1.625	-0.625	0.302833	1	-0.106838	0
OG0003646	AT1G79820.2	Ara1	2475	2475	2475	31	13	22	25	16	25	2.2017	-1.2017	0.0955975	1	-0.194662	0
OG0003647	AT1G50910.1	variable	2500	2520	2185	60	41	23	15	51	28	1.43223	-0.432225	0.313692	1	-0.0773219	0
OG0003648	AT5G03160.1	Ara1	2409	2415	2405	21	18	11	31	13	39	5.72727	-4.72727	0.000484761	0	-0.40625	0
OG0003649	AT5G47080.1	Ara1	1435	1455	1435	15	27	15	36	9	18	2	-1	0.283791	1	-0.166667	0
OG0003650	AT5G02290.2	Ara1	1944	2020	1945	21	16	28	27	8	19	1.78125	-0.78125	0.326671	1	-0.132275	0
OG0003654	AT2G18250.1	variable	880	880	880	20	7	9	18	8	11	3.05556	-2.05556	0.0801411	0	-0.268603	0
OG0003655	AT5G60340.1	Ara1	830	950	830	13	28	9	14	5	8	2.31111	-1.31111	0.305267	1	-0.206294	1
OG0003657	AT3G23600.2	variable	1195	1195	1195	21	33	7	25	7	9	3.85714	-2.85714	0.053932	0	-0.3125	0
OG0003658	AT5G66440.1	variable	1260	1340	1230	19	52	9	22	26	13	1.05556	-0.0555556	1	1	-0.0119048	0
OG0003659	AT1G51540.1	variable	2075	2075	2075	16	17	17	25	16	37	2.17647	-1.17647	0.110346	1	-0.182962	0
OG0003660	AT5G14850.1	Ara1	2740	2770	2725	24	41	7	47	23	27	4.02484	-3.02484	0.00606447	1	-0.314194	0
OG0003661	AT4G09950.1	variable	1677	2940	1680	45	47	36	31	22	21	1.19318	-0.193182	0.706523	1	-0.0439276	0
OG0003662	AT3G29385.1	variable	1090	1490	1090	56	59	10	21	23	6	1.46087	-0.46087	0.55701	0	-0.0553814	0
OG0003663	AT1G73350.2	Ara1	1040	1240	1040	3	17	7	7	2	2	0.428571	0.571429	0.58042	1	0.2	0
OG0003664	AT5G03370.1	Ara1	855	865	855	14	17	7	9	0	4	Inf	#NAME?	0.026087	0	-0.666667	1
OG0003665	AT5G42940.1	Ara1	3454	3465	3400	94	88	37	36	57	17	0.757705	0.242295	0.509363	1	0.052713	0
OG0003666	AT5G47690.1	Ara1	8025	8195	8025	118	128	63	89	67	58	1.62142	-0.621417	0.0440896	1	-0.115934	0
OG0003668	AT2G31650.1	Ara1	5310	5340	5310	73	119	22	70	52	49	3.12675	-2.12675	0.000328126	1	-0.25357	0
OG0003669	AT1G55670.1	Ara1	800	810	800	6	7	10	23	2	8	2.4	-1.4	0.419846	1	-0.175	0
OG0003670	AT2G42395.1	variable	520	535	505	8	15	3	10	11	10	2.42424	-1.42424	0.450133	0	-0.203463	0
OG0003671	AT3G48900.2	Ara1	2678	3005	2680	68	59	22	38	82	16	0.603104	0.396896	0.203875	1	0.0811791	0
OG0003672	AT3G48470.1	Ara1	5134	5160	5045	137	77	32	40	101	42	1.78032	-0.780322	0.0333119	0	-0.104357	0
OG0003674	AT4G25434.1	variable	1384	1410	1385	27	21	7	25	16	17	4.09821	-3.09821	0.0111744	1	-0.309269	0
OG0003676	AT1G30190.1	variable	1389	1430	1375	44	54	7	21	41	11	1.68641	-0.686411	0.437542	0	-0.0742836	0
OG0003677	AT3G25150.1	Ara1	2440	2455	2435	57	51	25	38	24	17	1.615	-0.615	0.234298	1	-0.109756	0
OG0003678	AT3G10070.1	Ara1	2694	2705	2685	36	43	19	35	36	32	1.68421	-0.684211	0.19861	1	-0.125134	0
OG0003681	AT4G18530.1	variable	1945	1945	1945	44	34	29	36	14	21	2.27586	-1.27586	0.063699	1	-0.20274	0
OG0003682	AT2G02480.1	Ara1	6089	6225	6075	132	67	72	95	38	48	2.31579	-1.31579	0.00165904	1	-0.205198	0
OG0003683	AT5G37020.1	Ara1	4055	4135	4040	38	23	35	44	26	54	2.25495	-1.25495	0.0212939	0	-0.195548	0
OG0003684	AT1G59520.1	Ara1	1940	1940	1940	43	14	51	44	5	13	2.19216	-1.19216	0.19841	1	-0.179669	0
OG0003685	AT3G21740.1	Ara1	1685	1685	1685	38	34	14	34	16	26	4.41071	-3.41071	0.000818676	0	-0.349817	0
OG0003686	AT2G31450.1	Ara1	1895	1905	1890	16	29	13	25	26	20	0.946746	0.0532544	1	1	0.0134933	0
OG0003688	AT1G72990.1	Ara1	3482	3500	3455	71	58	23	47	41	35	2.63521	-1.63521	0.0035897	1	-0.215845	0
OG0003689	AT1G22040.1	Ara1	2375	2405	2375	25	26	14	43	29	29	1.78571	-0.785714	0.212726	1	-0.141026	0
OG0003690	AT3G24315.1	Ara1	1465	1470	1465	19	18	9	25	7	17	5.12698	-4.12698	0.0115478	1	-0.386905	0
OG0003691	AT5G51460.1	Ara1	1925	2220	1915	11	21	22	20	11	33	1.5	-0.5	0.454417	1	-0.0833333	0
OG0003692	AT5G03050.1	Ara1	700	700	700	12	9	6	9	7	6	1.71429	-0.714286	0.709769	1	-0.128205	0
OG0003693	AT3G52300.1	Ara1	840	840	840	4	1	9	14	8	13	0.722222	0.277778	0.727088	1	0.0732601	0
OG0003694	AT1G55325.1	Ara1	9605	9855	9250	115	96	49	128	106	88	1.9484	-0.948402	0.00318219	1	-0.154828	0
OG0003695	AT5G57380.1	Ara1	3100	3140	3100	42	78	18	47	49	37	1.7619	-0.761905	0.121427	1	-0.130233	0
OG0003696	AT3G63290.1	Ara1	2015	2160	2010	24	39	10	24	49	34	1.66531	-0.665306	0.2958	1	-0.115521	0
OG0003697	AT3G11710.1	variable	3130	3205	3125	20	44	19	39	57	46	0.849492	0.150508	0.708391	1	0.0405775	0
OG0003699	AT5G49830.1	Ara1	3760	8525	3760	34	25	28	51	23	41	2.1646	-1.1646	0.048532	1	-0.189012	0
OG0003700	AT5G37450.1	Ara1	4674	4920	4555	64	107	54	83	56	58	1.22751	-0.227513	0.511276	0	-0.0511448	0
OG0003701	AT1G01640.1	variable	1033	1205	1035	16	15	7	8	24	16	1.52381	-0.52381	0.588402	0	-0.0956522	0
OG0003702	AT4G10890.1	Ara1	2626	2650	1435	67	46	15	21	31	10	1.44086	-0.44086	0.479207	1	-0.0609756	0
OG0003703	AT2G41500.1	Ara1	2769	2785	2770	31	30	20	63	23	26	1.75217	-0.752174	0.228459	1	-0.138455	0
OG0003704	AT4G19112.1	Ara1	2305	2305	2295	46	18	37	32	14	21	1.86486	-0.864865	0.159135	1	-0.154217	0
OG0003706	AT2G18760.1	Ara1	5934	5955	5935	114	79	62	85	47	28	1.0954	-0.0954015	0.774856	1	-0.0210606	0
OG0003707	AT1G04860.1	Ara1	4805	4830	4780	68	111	33	55	93	56	1.2408	-0.240795	0.501161	1	-0.0491063	0
OG0003708	AT5G36160.1	Ara1	2100	2105	2090	34	46	35	47	18	21	1.13333	-0.133333	0.841922	0	-0.0312152	0
OG0003709	AT5G47160.1	Ara1	2073	2815	2070	66	143	10	35	76	9	0.781579	0.218421	0.633668	1	0.0256966	0
OG0003710	AT3G57760.1	Ara1	1888	1895	1875	50	42	9	33	16	18	6.25	-5.25	0.000259856	1	-0.376869	0
OG0003711	AT1G67140.1	Ara1	11101	11180	10980	240	161	116	150	87	87	2.06897	-1.06897	0.000136741	1	-0.174157	0
OG0003712	AT5G07370.2	Ara1	1430	1430	1430	8	8	8	17	18	22	1.22222	-0.222222	0.774034	1	-0.05	0
OG0003713	AT1G53380.1	Ara1	2264	2265	2260	37	33	24	43	16	28	2.69792	-1.69792	0.0179123	1	-0.242921	0
OG0003714	AT3G22900.1	Ara1	870	1160	870	17	44	5	18	15	8	1.81333	-0.813333	0.513633	1	-0.120553	0
OG0003715	AT5G07630.1	variable	3052	3055	2605	28	36	29	26	46	27	0.566717	0.433283	0.15312	1	0.138909	0
OG0003716	AT1G51520.1	Ara1	2048	3005	2050	772	25	14	1	24	0	0	1	1	1	0.0178117	0
OG0003718	AT1G66080.1	Ara1	950	950	950	19	10	22	13	5	9	1.55455	-0.554545	0.54706	1	-0.106272	0
OG0003719	AT3G23100.1	Ara1	1320	1385	1240	38	26	12	26	14	11	2.4881	-1.4881	0.110734	1	-0.2	0
OG0003720	AT4G31570.1	Ara1	13650	13785	13530	228	312	77	169	284	125	1.30327	-0.303274	0.130749	1	-0.0531645	0
OG0003721	AT1G74370.1	Ara1	1305	1580	1290	23	18	9	17	20	18	2.3	-1.3	0.139802	1	-0.192434	1
OG0003722	AT3G29390.1	Ara1	2889	2980	2880	130	54	43	40	35	13	1.12292	-0.122924	0.851352	1	-0.0222784	0
OG0003723	AT5G25440.1	variable	1564	1845	1565	55	115	8	27	48	11	1.57552	-0.575521	0.45612	0	-0.0594566	0
OG0003724	AT1G51200.1	Ara1	865	865	865	19	13	8	14	8	8	2.375	-1.375	0.208984	1	-0.203704	0
OG0003725	AT3G05680.1	Ara1	10690	10700	10690	107	136	51	163	62	63	2.13188	-1.13188	0.00231176	1	-0.181215	1
OG0003726	AT3G61160.1	variable	2155	2230	2155	28	18	12	32	12	34	6.61111	-5.61111	7.64318e-05	0	-0.43913	0
OG0003727	AT3G24080.1	variable	3190	3260	3090	49	96	21	41	117	23	0.458689	0.541311	0.0304486	0	0.135714	0
OG0003729	AT3G13222.1	Ara1	2835	2910	2805	42	81	16	28	90	30	0.875	0.125	0.718104	1	0.0258621	0
OG0003730	AT5G13960.1	Ara1	3120	3120	3115	17	28	13	49	44	31	0.921329	0.0786713	1	1	0.02	0
OG0003731	AT3G21100.2	Ara1	3009	3090	3010	33	38	15	50	21	27	2.82857	-1.82857	0.0231008	1	-0.25	0
OG0003733	AT1G11000.1	variable	2865	3200	2860	18	23	20	50	8	21	2.3625	-1.3625	0.131352	1	-0.197822	0
OG0003734	AT5G61540.1	Ara1	1794	1795	1795	29	26	12	15	29	22	1.83333	-0.833333	0.197263	1	-0.13869	0
OG0003736	AT1G72110.1	Ara1	2394	2395	2390	29	127	10	20	14	8	1.65714	-0.657143	0.396812	1	-0.107226	0
OG0003737	AT5G52990.1	variable	1359	1370	1360	34	21	22	35	20	13	1.00455	-0.00454545	1	0	-0.00108225	0
OG0003738	AT3G19080.1	Ara1	2310	2355	2310	36	62	14	25	22	21	2.45455	-1.45455	0.0533956	1	-0.208372	0
OG0003739	AT1G50060.1	variable	805	810	805	26	31	9	8	22	4	0.525253	0.474747	0.365832	1	0.103297	0
OG0003740	AT5G52070.1	Ara1	1354	1365	1355	39	52	10	21	59	19	1.25593	-0.255932	0.668539	1	-0.0395081	0
OG0003742	AT4G09040.1	Ara1	1520	1555	1475	39	33	16	21	20	14	1.70625	-0.70625	0.257977	1	-0.120856	0
OG0003743	AT1G80670.1	variable	1745	1745	1745	7	12	9	13	6	19	2.46296	-1.46296	0.302388	0	-0.1975	0
OG0003744	AT1G08300.1	variable	3724	3840	3570	68	74	9	28	100	42	3.17333	-2.17333	0.00255536	1	-0.178892	0
OG0003745	AT5G60580.4	Ara1	2435	2470	2435	29	22	9	28	39	44	3.63533	-2.63533	0.00301023	1	-0.293278	0
OG0003746	AT5G33340.1	Ara1	2184	2205	2180	60	83	19	50	56	29	1.63534	-0.635338	0.172791	0	-0.10067	0
OG0003747	AT2G05990.1	Ara1	1950	1960	1950	20	22	25	51	10	15	1.2	-0.2	0.803628	1	-0.0444444	0
OG0003748	AT3G03150.1	Ara1	605	615	605	6	28	3	14	7	11	3.14286	-2.14286	0.236461	1	-0.277778	0
OG0003749	AT3G23210.1	Ara1	1600	1660	1590	30	50	12	20	46	17	0.923913	0.076087	1	0	0.015873	0
OG0003750	AT5G45070.1	variable	1768	1775	1770	9	58	4	29	65	20	0.692308	0.307692	0.72942	0	0.0723982	0
OG0003752	AT2G35130.1	Ara1	2955	3205	2940	38	28	24	47	32	29	1.4349	-0.434896	0.365232	0	-0.0883131	0
OG0003753	AT4G39140.3	Ara1	2145	2145	2130	26	44	12	36	17	26	3.31373	-2.31373	0.0139061	1	-0.288862	0
OG0003754	AT3G61700.2	Ara1	1795	1795	1790	21	15	10	19	7	15	4.5	-3.5	0.0131464	1	-0.359238	0
OG0003756	AT5G27610.1	Ara1	4854	4910	4840	121	158	27	41	120	40	1.49383	-0.493827	0.168179	1	-0.0675676	0
OG0003757	AT1G49900.1	variable	4580	4910	3835	36	127	17	23	91	16	0.372334	0.627666	0.0211666	0	0.171222	0
OG0003760	AT2G42820.1	Ara1	790	790	790	9	4	8	17	3	6	2.25	-1.25	0.429108	1	-0.196078	0
OG0003762	AT5G52560.1	Ara1	3070	3070	3070	39	17	28	67	13	34	3.64286	-2.64286	0.00208433	1	-0.305494	0
OG0003763	AT2G21520.1	variable	3165	3205	3160	37	25	42	59	15	43	2.5254	-1.5254	0.0134717	1	-0.209734	0
OG0003764	AT3G03440.1	Ara1	2040	2045	2030	23	25	22	36	12	25	2.17803	-1.17803	0.117357	1	-0.186787	0
OG0003765	AT3G02760.1	Ara1	4415	4440	4410	65	109	39	74	50	35	1.16667	-0.166667	0.654376	0	-0.0367647	0
OG0003766	AT1G45145.1	Ara1	590	590	590	10	9	2	12	6	6	5	-4	0.193027	0	-0.333333	0
OG0003767	AT3G21520.1	Ara1	1035	1050	1025	14	14	16	20	6	20	2.91667	-1.91667	0.0946614	0	-0.235897	0
OG0003768	AT4G33750.1	Ara1	2360	2365	2315	33	66	15	21	41	28	1.50244	-0.502439	0.334953	1	-0.0932971	0
OG0003769	AT4G38380.1	Ara1	2800	4020	2800	24	48	20	35	34	28	0.988235	0.0117647	1	1	0.00293255	0
OG0003771	AT2G23780.1	Ara1	1135	1415	1125	9	15	13	28	16	19	0.822115	0.177885	0.788481	1	0.0480519	0
OG0003772	AT5G55960.1	variable	3238	3245	3240	45	34	39	78	12	49	4.71154	-3.71154	3.48632e-05	0	-0.338993	0
OG0003773	AT5G19530.1	Ara1	1695	1865	1695	10	7	22	25	9	23	1.16162	-0.161616	1	1	-0.03125	0
OG0003774	AT5G18440.2	Ara1	2350	2760	2320	41	73	18	31	49	17	0.790249	0.209751	0.690217	1	0.047509	0
OG0003776	AT1G63260.1	variable	1420	1440	1300	15	9	13	16	27	15	0.641026	0.358974	0.457293	1	0.107143	0
OG0003777	AT1G33410.1	Ara1	7499	7530	7500	176	143	72	102	59	70	2.90019	-1.90019	2.25135e-06	1	-0.252313	0
OG0003778	AT4G30490.1	Ara1	2485	2490	2485	28	25	15	29	20	31	2.89333	-1.89333	0.0141648	1	-0.259006	0
OG0003779	AT5G58160.1	variable	6328	6415	6295	90	135	69	98	54	59	1.42512	-0.425121	0.175444	1	-0.0881616	0
OG0003782	AT1G16540.1	Ara1	4095	4100	4095	44	61	26	47	30	18	1.01538	-0.0153846	1	1	-0.00357143	0
OG0003783	AT2G20180.1	Ara1	2035	2670	2015	39	72	8	25	48	31	3.14844	-2.14844	0.00991704	1	-0.222192	0
OG0003784	AT4G24400.1	Ara1	2225	2225	2225	13	11	18	38	8	25	2.25694	-1.25694	0.184138	1	-0.176931	0
OG0003785	AT3G56660.1	Ara1	3099	3495	3045	52	82	8	15	55	14	1.65455	-0.654545	0.352382	1	-0.0695652	0
OG0003786	AT3G14170.1	Ara1	2525	2530	2525	32	54	19	21	52	45	1.45749	-0.45749	0.301065	1	-0.0913685	0
OG0003787	AT5G43680.1	Ara1	1160	1160	1155	38	24	27	24	7	7	1.40741	-0.407407	0.568825	1	-0.0846154	0
OG0003788	AT3G06340.2	Ara1	3365	3680	3335	50	96	21	39	80	41	1.22024	-0.220238	0.631964	1	-0.0430683	0
OG0003789	AT4G19440.1	Ara1	4188	4205	4175	162	85	76	61	31	28	1.9253	-0.925297	0.032455	1	-0.155249	0
OG0003790	AT4G18880.1	Ara1	2005	2025	2005	27	36	22	35	21	10	0.584416	0.415584	0.349656	1	0.126399	0
OG0003792	AT1G31910.1	variable	2525	2525	2525	36	18	24	23	20	26	1.95	-0.95	0.117004	1	-0.165217	0
OG0003793	AT3G48460.1	Ara1	1905	2055	1905	28	28	26	40	28	18	0.692308	0.307692	0.421657	0	0.0901771	0
OG0003794	AT4G30480.2	Ara1	1040	1385	1040	23	15	7	11	16	15	3.08036	-2.08036	0.0620018	0	-0.250538	0
OG0003797	AT3G48440.1	Ara1	2239	2410	2215	42	83	22	33	32	21	1.25284	-0.252841	0.569898	1	-0.0524764	0
OG0003798	AT2G19640.1	variable	1705	2005	1700	23	25	22	42	28	6	0.224026	0.775974	0.00468847	0	0.312418	0
OG0003800	AT3G12980.1	Ara1	8350	8375	8315	93	203	60	118	110	72	1.01455	-0.0145455	1	1	-0.00344753	0
OG0003801	AT3G61960.1	Ara1	3130	3130	3125	34	46	18	47	25	34	2.56889	-1.56889	0.0219421	1	-0.230117	0
OG0003803	AT5G18310.2	Ara1	695	840	695	14	17	3	9	13	7	2.51282	-1.51282	0.287603	1	-0.173529	0
OG0003804	AT1G72650.2	Ara1	3120	3715	3120	73	71	14	36	72	35	2.53472	-1.53472	0.00830385	1	-0.166183	0
OG0003805	AT1G56440.1	Ara1	2379	2380	2380	51	66	24	48	45	17	0.802778	0.197222	0.579933	1	0.0458065	0
OG0003806	AT3G61360.1	variable	2490	2490	2480	37	45	28	49	14	25	2.35969	-1.35969	0.0445379	1	-0.210256	0
OG0003807	AT5G55530.2	Ara1	2025	2195	2025	21	28	20	20	3	13	4.55	-3.55	0.0367847	1	-0.324695	0
OG0003808	AT1G03320.1	Ara1	1099	1150	985	29	34	5	7	52	8	0.892308	0.107692	1	1	0.0137255	0
OG0003809	AT3G21710.2	Ara1	875	1245	860	21	18	8	15	41	7	0.448171	0.551829	0.234957	0	0.130029	0
OG0003811	AT5G04070.1	Ara1	1795	2005	1795	34	57	14	26	22	17	1.87662	-0.876623	0.183116	1	-0.144231	0
OG0003812	AT5G57370.1	Ara1	1095	1145	1085	16	14	9	28	11	16	2.58586	-1.58586	0.106623	0	-0.232593	0
OG0003813	AT3G07530.1	Ara1	3494	3520	3475	65	78	26	61	43	30	1.74419	-0.744186	0.100471	1	-0.125245	0
OG0003814	AT4G25530.1	Ara1	3430	3460	3415	55	177	10	37	139	29	1.14748	-0.147482	0.845836	1	-0.0187729	0
OG0003815	AT5G47520.1	Ara1	1105	1105	1105	11	1	5	30	1	12	26.4	-25.4	0.00181488	1	-0.610577	0
OG0003816	AT1G04120.1	Ara1	7570	7570	7570	37	41	38	115	38	97	2.48546	-1.48546	0.00266441	1	-0.211852	0
OG0003817	AT5G23720.1	Ara1	4644	4660	4635	45	33	58	73	42	45	0.831281	0.168719	0.560854	1	0.0458654	0
OG0003818	AT1G49180.1	Ara1	2036	2055	1335	24	32	8	20	40	22	1.65	-0.65	0.356058	1	-0.104839	0
OG0003819	AT1G22500.1	variable	1905	1935	1905	17	43	14	26	55	29	0.64026	0.35974	0.385272	0	0.106375	0
OG0003821	AT2G21380.1	variable	5289	5350	5290	68	64	51	91	36	38	1.40741	-0.407407	0.298883	1	-0.0849421	0
OG0003822	AT3G02930.1	Ara1	4029	4100	4030	60	89	16	39	86	49	2.13663	-1.13663	0.0291907	1	-0.152437	0
OG0003823	AT3G63460.1	Ara1	5520	5815	5505	49	82	44	61	49	46	1.04545	-0.0454545	0.885087	1	-0.0110922	0
OG0003824	AT4G34040.1	Ara1	3329	3360	3330	61	48	27	32	39	45	2.60684	-1.60684	0.00322191	1	-0.228896	0
OG0003825	AT3G45140.1	Ara1	4480	4515	4480	103	205	126	136	71	27	0.310865	0.689135	6.31244e-06	1	0.274708	0
OG0003826	AT1G67370.1	variable	2979	2995	2975	35	36	18	44	27	28	2.01646	-1.01646	0.0834804	0	-0.169468	0
OG0003828	AT1G09730.1	Ara1	4814	4865	4635	69	90	27	53	91	41	1.1514	-0.151404	0.66241	1	-0.0293561	0
OG0003829	AT1G65080.1	Ara1	2625	10250	2610	94	47	48	33	19	23	2.37061	-1.37061	0.0187812	1	-0.209591	0
OG0003830	AT3G25660.1	Ara1	2685	2685	2680	68	24	30	32	15	18	2.72	-1.72	0.0208156	0	-0.239332	0
OG0003831	AT1G76130.1	Ara1	2065	2065	2065	36	11	17	31	17	22	2.74048	-1.74048	0.0321519	1	-0.243348	0
OG0003832	AT4G22540.1	Ara1	3605	3670	3605	40	35	27	45	28	70	3.7037	-2.7037	9.8542e-05	1	-0.311301	0
OG0003833	AT5G53200.1	Ara1	530	545	530	3	6	1	5	3	9	9	-8	0.118132	1	-0.5	0
OG0003834	AT2G43500.1	variable	4670	4840	4665	54	71	18	59	71	49	2.07042	-1.07042	0.0290979	1	-0.158333	0
OG0003835	AT3G24840.1	Ara1	2895	2930	2890	52	40	33	32	23	28	1.91831	-0.918314	0.0770768	1	-0.160784	0
OG0003836	AT1G75210.1	Ara1	3210	3210	3175	36	36	23	41	28	33	1.84472	-0.84472	0.104101	1	-0.151153	0
OG0003837	AT5G66310.1	Ara1	5315	5385	5210	85	108	39	63	83	40	1.05036	-0.0503553	0.892006	1	-0.0106871	0
OG0003838	AT4G31450.1	Ara1	2485	2515	2475	38	78	12	21	38	25	2.08333	-1.08333	0.106278	1	-0.156825	0
OG0003840	AT5G62790.1	Ara1	2384	2420	2385	24	26	26	44	3	19	5.84615	-4.84615	0.00758165	1	-0.343636	1
OG0003841	AT4G19160.2	Ara1	1560	2275	1560	21	10	26	23	12	12	0.807692	0.192308	0.802272	1	0.0531915	0
OG0003842	AT4G39460.1	Ara1	1625	1625	1620	12	11	11	16	12	19	1.72727	-0.727273	0.409796	1	-0.134642	0
OG0003843	AT5G51710.1	Ara1	2840	2840	2840	25	12	26	64	6	20	3.20513	-2.20513	0.0482021	1	-0.259427	0
OG0003844	AT4G25450.1	Ara1	3570	3570	3565	40	26	28	47	31	61	2.81106	-1.81106	0.00215908	0	-0.251279	0
OG0003847	AT2G21940.1	Ara1	1515	1525	1515	44	30	17	25	13	12	2.38914	-1.38914	0.0842339	1	-0.201311	0
OG0003848	AT1G69580.2	Ara1	1680	1710	1675	34	23	29	24	17	13	0.896552	0.103448	0.827587	1	0.0269841	0
OG0003850	AT1G70430.1	Ara1	2970	3150	2765	46	61	49	38	52	31	0.559655	0.440345	0.070125	1	0.142295	0
OG0003851	AT5G03420.1	Ara1	2990	3310	2960	104	71	27	25	34	17	1.92593	-0.925926	0.0840085	1	-0.127226	0
OG0003853	AT5G08130.1	Ara1	2045	2765	2040	21	47	9	39	15	21	3.26667	-2.26667	0.0270851	1	-0.283333	0
OG0003854	AT2G01460.1	Ara1	4775	4825	4775	36	15	52	71	12	66	3.80769	-2.80769	0.000306097	1	-0.255245	0
OG0003855	AT5G46550.1	variable	2470	2670	2470	50	112	9	30	86	22	1.42119	-0.421189	0.533192	0	-0.0511613	0
OG0003856	AT5G43340.1	variable	2580	2645	2580	54	63	51	72	36	16	0.470588	0.529412	0.0401754	1	0.178022	0
OG0003857	AT5G44560.1	variable	1110	1110	1110	8	5	25	13	1	5	1.6	-0.6	1	1	-0.0757576	0
OG0003858	AT1G28490.1	Ara1	1225	1225	1225	12	6	15	14	4	7	1.4	-0.4	0.729159	1	-0.0808081	0
OG0003859	AT1G20430.1	variable	579	580	580	7	12	9	14	3	6	1.55556	-0.555556	0.691318	1	-0.104167	0
OG0003860	AT3G50910.1	Ara1	2235	2250	2235	41	33	21	33	16	26	3.17262	-2.17262	0.00551949	1	-0.280338	0
OG0003861	AT5G10720.1	variable	4610	4615	4600	44	66	32	71	54	73	1.8588	-0.858796	0.0421827	0	-0.153751	0
OG0003862	AT3G09380.1	Ara1	742	795	745	15	30	3	7	42	7	0.833333	0.166667	1	1	0.0238095	0
OG0003863	AT5G20980.2	Ara1	4060	4070	4060	57	47	48	44	29	44	1.80172	-0.801724	0.0676303	1	-0.145597	0
OG0003864	AT4G36860.1	Ara1	2766	2965	2765	33	24	39	43	15	25	1.41026	-0.410256	0.430742	1	-0.0833333	0
OG0003865	AT2G27550.1	variable	875	875	875	2	5	15	31	2	5	0.333333	0.666667	0.552042	0	0.168067	0
OG0003866	AT3G21530.1	Ara1	2290	2295	2290	32	27	9	37	18	28	5.53086	-4.53086	0.000435165	1	-0.389183	0
OG0003867	AT5G19100.1	variable	1954	1965	1945	81	67	36	37	34	13	0.860294	0.139706	0.850544	0	0.0310966	0
OG0003868	AT5G59980.1	Ara1	2904	3545	2895	74	75	25	30	25	27	3.1968	-2.1968	0.00198581	1	-0.266706	0
OG0003869	AT1G67800.2	Ara1	2165	2185	2160	21	41	14	34	21	30	2.14286	-1.14286	0.12409	1	-0.188235	0
OG0003870	AT1G80550.1	Ara1	2240	2245	2235	37	58	9	44	13	20	6.32479	-5.32479	0.000316326	0	-0.410408	0
OG0003871	AT1G13730.1	Ara1	2139	2205	2140	28	66	15	30	51	32	1.17124	-0.171242	0.703201	1	-0.036705	0
OG0003872	AT1G03310.2	Ara1	4410	4415	4405	64	62	29	53	82	70	1.88394	-0.883936	0.023106	1	-0.148698	0
OG0003873	AT4G32330.1	Ara1	2185	2195	2185	34	35	14	25	39	19	1.18315	-0.18315	0.83342	1	-0.0359195	0
OG0003874	AT1G08350.1	Ara1	2540	2935	2540	45	52	11	40	45	33	3	-2	0.00864048	1	-0.226648	0
OG0003875	AT2G18750.1	Ara1	3110	3130	3110	38	13	29	35	11	37	4.40752	-3.40752	0.000509288	1	-0.337998	0
OG0003876	AT3G49601.1	variable	2955	3090	2925	69	130	25	40	61	35	1.58361	-0.583607	0.161859	1	-0.0986259	0
OG0003877	AT3G43860.1	Ara1	2430	2450	2430	57	53	56	45	23	18	0.796584	0.203416	0.586784	1	0.0565508	0
OG0003878	AT2G14050.1	Ara1	3254	3430	3255	86	56	84	80	16	22	1.40774	-0.407738	0.373886	1	-0.0848297	0
OG0003880	AT1G64680.1	Ara1	1250	1255	1250	19	13	11	19	7	10	2.46753	-1.46753	0.222266	1	-0.221569	0
OG0003881	AT3G21760.1	Ara1	2423	2435	2425	58	62	23	40	61	43	1.77762	-0.777619	0.0886382	0	-0.129511	0
OG0003882	AT4G32360.1	Ara1	2415	2540	2415	35	42	11	37	38	31	2.59569	-1.59569	0.0294541	1	-0.210145	0
OG0003883	AT1G47640.1	Ara1	1140	1140	1140	10	9	23	34	4	6	0.652174	0.347826	0.703691	0	0.0969697	0
OG0003885	AT1G30380.1	Ara1	650	650	650	7	4	8	11	2	13	5.6875	-4.6875	0.108646	0	-0.333333	0
OG0003887	AT4G10360.1	Ara1	1330	1330	1330	24	16	27	21	10	12	1.06667	-0.0666667	1	1	-0.0160428	0
OG0003889	AT3G02660.1	Ara1	2555	3260	2555	17	38	22	46	14	33	1.82143	-0.821429	0.259389	1	-0.138025	0
OG0003890	AT5G38770.1	Ara1	485	555	485	16	11	7	13	12	5	0.952381	0.047619	1	1	0.0102302	0
OG0003893	AT3G22104.1	Ara1	2530	2530	2505	64	46	33	31	33	21	1.23416	-0.23416	0.597131	1	-0.0486827	0
OG0003894	AT1G47830.1	Ara1	710	710	710	1	0	8	18	1	6	0.75	0.25	1	1	0.031746	0
OG0003895	AT1G67500.1	Ara1	9448	9545	9425	181	185	49	90	94	72	2.82935	-1.82935	3.15637e-06	1	-0.220691	0
OG0003896	AT1G10950.1	Ara1	2945	2945	2945	10	14	18	51	8	47	3.26389	-2.26389	0.046391	1	-0.211688	0
OG0003897	AT4G36250.1	Ara1	2420	2425	2420	23	31	33	29	20	16	0.557576	0.442424	0.202975	0	0.144841	0
OG0003898	AT2G24540.1	Ara1	1860	1860	1860	38	46	21	43	28	19	1.22789	-0.227891	0.688149	1	-0.0483231	0
OG0003899	AT3G50880.1	Ara1	1365	1390	1365	46	32	17	34	12	14	3.15686	-2.15686	0.0264862	1	-0.26862	0
OG0003900	AT2G31370.4	Ara1	1991	2010	1975	13	11	8	30	12	33	4.46875	-3.46875	0.0130091	1	-0.352381	0
OG0003901	AT5G25752.1	variable	1434	1505	1410	31	70	11	22	25	6	0.676364	0.323636	0.582098	1	0.0683564	0
OG0003902	AT5G63690.1	Ara1	692	1075	690	270	23	5	0	4	0	0	1	1	1	0.0181818	0
OG0003904	AT2G39490.1	variable	1935	1965	1930	33	61	12	32	51	31	1.67157	-0.671569	0.242341	1	-0.111382	0
OG0003905	AT1G59750.1	Ara1	3324	3325	3325	67	25	37	43	13	28	3.90021	-2.90021	0.000430446	1	-0.327158	0
OG0003906	AT5G63610.1	Ara1	2350	2355	2345	9	18	38	39	11	19	0.409091	0.590909	0.112414	1	0.175177	0
OG0003907	AT3G18010.1	variable	1750	1765	1750	30	50	13	33	31	12	0.8933	0.1067	1	1	0.0232558	0
OG0003908	AT5G38050.1	Ara1	1404	1595	1405	60	48	24	20	5	11	5.5	-4.5	0.00351357	1	-0.401786	0
OG0003909	AT1G27630.1	Ara1	1585	1585	1585	20	15	16	15	15	25	2.08333	-1.08333	0.166629	1	-0.180556	0
OG0003910	AT5G01400.1	Ara1	7335	7535	7225	117	122	41	70	113	77	1.94453	-0.944528	0.00453297	1	-0.145769	0
OG0003911	AT5G57020.1	Ara1	2170	2550	2170	18	11	21	43	7	37	4.53061	-3.53061	0.00384463	1	-0.302448	0
OG0003912	AT2G40670.1	Ara1	820	1020	815	11	17	8	14	7	6	1.17857	-0.178571	1	1	-0.0404858	0
OG0003913	AT1G01690.1	Ara1	2255	2255	2230	34	49	19	30	44	29	1.17943	-0.179426	0.712434	1	-0.0387697	0
OG0003914	AT1G63270.1	variable	1145	1145	1145	7	3	26	23	0	12	Inf	#NAME?	0.163559	0	-0.212121	0
OG0003915	AT3G02160.1	Ara1	1983	2110	1960	41	64	13	29	65	20	0.970414	0.0295858	1	1	0.00544662	0
OG0003916	AT5G41070.1	Ara1	1964	2030	1950	53	104	23	27	38	9	0.545767	0.454233	0.207597	1	0.111142	0
OG0003917	AT3G57170.1	Ara1	2800	3655	2730	39	50	12	37	71	35	1.60211	-0.602113	0.266531	1	-0.0948946	0
OG0003918	AT1G08910.1	Ara1	4145	4580	3915	72	152	17	42	120	30	1.05882	-0.0588235	1	1	-0.00898876	0
OG0003919	AT2G40540.1	Ara1	3970	3975	3970	24	14	38	94	19	62	2.06094	-1.06094	0.0654778	1	-0.152529	0
OG0003920	AT5G58540.1	Ara1	2420	2420	2420	32	85	9	38	48	30	2.22222	-1.22222	0.0994815	1	-0.165103	0
OG0003921	AT5G38600.1	Ara1	2659	2695	2650	78	64	34	50	18	14	1.78431	-0.784314	0.201906	1	-0.133929	0
OG0003922	AT1G08630.2	Ara1	1790	1790	1790	19	21	17	42	16	21	1.46691	-0.466912	0.485642	1	-0.0953453	0
OG0003924	AT3G57440.1	Ara1	1205	1210	1205	7	16	5	9	9	11	1.71111	-0.711111	0.715987	1	-0.133333	0
OG0003925	AT3G53360.1	Ara1	3840	3840	3840	92	71	34	65	49	28	1.54622	-0.546218	0.208793	1	-0.0937951	0
OG0003927	AT3G62300.1	variable	3609	3690	3610	47	112	23	38	99	32	0.660518	0.339482	0.245211	1	0.0842966	0
OG0003928	AT1G64810.1	Ara1	2180	2180	2180	47	37	25	42	20	33	3.102	-2.102	0.00352617	1	-0.275419	0
OG0003931	AT5G21222.1	Ara1	4155	4160	4155	51	54	27	45	57	54	1.78947	-0.789474	0.0729642	1	-0.140333	0
OG0003932	AT2G38780.1	variable	2325	2325	2300	41	44	18	35	39	17	0.992877	0.00712251	1	1	0.00151332	0
OG0003934	AT1G14620.1	Ara1	1165	1165	1165	11	8	5	11	5	14	6.16	-5.16	0.0184883	1	-0.424342	0
OG0003935	AT1G01060.3	Ara1	3225	3370	3205	39	49	15	34	50	43	2.236	-1.236	0.0355326	1	-0.184588	0
OG0003936	AT3G16840.1	Ara1	4130	4175	4125	48	71	23	69	103	26	0.526805	0.473195	0.0604627	1	0.122393	0
OG0003937	AT2G01640.1	Ara1	780	780	780	14	11	12	17	10	10	1.16667	-0.166667	1	1	-0.0384615	0
OG0003938	AT1G16240.3	Ara1	1160	1165	1160	16	24	11	23	12	9	1.09091	-0.0909091	1	1	-0.021164	0
OG0003939	AT3G27860.1	Ara1	3256	3500	3210	99	108	27	35	64	28	1.60417	-0.604167	0.155771	1	-0.0900621	0
OG0003940	AT5G58610.1	Ara1	5324	5550	5320	91	211	29	75	165	45	0.855799	0.144201	0.58498	1	0.027381	0
OG0003941	AT3G05440.1	variable	609	790	610	243	15	3	1	3	0	0	1	1	0	0.0121951	0
OG0003942	AT1G73100.1	Ara1	3345	3345	3345	76	42	25	29	69	43	1.89449	-0.894493	0.0394973	1	-0.136404	0
OG0003943	AT1G54850.1	Ara1	1030	1030	1030	21	16	12	16	20	10	0.875	0.125	1	0	0.030303	0
OG0003945	AT5G14930.2	Ara1	656	2720	590	10	18	4	9	51	4	0.196078	0.803922	0.0476675	0	0.212987	0
OG0003949	AT2G27490.2	variable	1160	1160	1160	27	45	9	26	6	13	6.5	-5.5	0.00330529	0	-0.434211	0
OG0003950	AT1G27390.1	Ara1	1050	1050	1025	11	27	10	10	40	11	0.3025	0.6975	0.0443421	1	0.260504	0
OG0003952	AT5G58300.1	Ara1	3270	3300	3270	35	56	29	55	20	32	1.93103	-0.931034	0.09475	1	-0.16226	0
OG0003953	AT2G42120.1	Ara1	2204	2220	2200	29	10	21	50	16	15	1.29464	-0.294643	0.648293	1	-0.063871	0
OG0003954	AT2G30600.4	Ara1	4045	4065	4045	40	55	34	54	27	31	1.35076	-0.350763	0.483213	1	-0.0750233	0
OG0003955	AT3G06120.1	Ara1	1010	1015	1005	10	9	6	14	7	23	5.47619	-4.47619	0.0123553	0	-0.391667	0
OG0003956	AT3G21070.1	Ara1	2395	2655	2365	7	20	18	47	13	27	0.807692	0.192308	0.786779	1	0.045	0
OG0003958	AT1G77890.1	Ara1	2298	2305	2300	41	35	17	32	46	30	1.57289	-0.57289	0.273875	1	-0.101633	0
OG0003959	AT1G19330.1	Ara1	1235	1235	1230	15	5	9	17	6	10	2.77778	-1.77778	0.196489	1	-0.25	0
OG0003960	AT5G20320.1	Ara1	8510	11875	8495	112	200	47	102	123	53	1.02681	-0.026812	1	1	-0.00553888	0
OG0003961	AT5G15270.1	Ara1	2740	2750	2710	18	22	26	33	18	36	1.38462	-0.384615	0.52859	1	-0.0757576	0
OG0003963	AT4G03290.1	Ara1	770	770	770	23	21	13	11	5	7	2.47692	-1.47692	0.197738	0	-0.222222	0
OG0003964	AT1G17050.1	variable	2085	2125	2085	19	11	26	42	26	25	0.702663	0.297337	0.419025	1	0.0875817	0
OG0003965	AT5G03560.1	Ara1	1203	2630	1205	38	27	7	13	16	13	4.41071	-3.41071	0.00778881	1	-0.29272	0
OG0003966	AT2G05160.1	variable	2679	2695	2680	84	26	44	58	30	29	1.84545	-0.845455	0.0755255	1	-0.147775	0
OG0003968	AT1G72320.1	Ara1	3765	3765	3765	57	32	14	40	42	36	3.4898	-2.4898	0.000888044	1	-0.264355	0
OG0003969	AT2G46520.1	Ara1	4860	4865	4860	39	61	34	65	48	44	1.05147	-0.0514706	0.876804	1	-0.0125074	0
OG0003970	AT2G43490.1	Ara1	3725	3725	3725	34	34	19	42	22	36	2.92823	-1.92823	0.00777418	1	-0.262199	0
OG0003971	AT1G04100.1	Ara1	1304	1350	1285	25	50	8	29	25	10	1.25	-0.25	0.786191	1	-0.04329	0
OG0003972	AT3G29010.1	Ara1	1310	1310	1310	30	40	8	28	14	12	3.21429	-2.21429	0.053706	1	-0.251012	0
OG0003973	AT2G20720.1	Ara1	1495	2390	1495	24	84	1	16	26	8	7.38462	-6.38462	0.064847	0	-0.195294	0
OG0003974	AT1G21650.1	Ara1	5255	5290	5250	49	47	27	53	35	57	2.95556	-1.95556	0.00106952	1	-0.264302	0
OG0003975	AT1G49310.1	variable	410	430	405	6	20	2	5	6	5	2.5	-1.5	0.633246	1	-0.204545	0
OG0003976	AT5G04920.1	Ara1	2200	2200	2195	24	17	13	30	19	48	4.66397	-3.66397	0.000398367	1	-0.365067	0
OG0003977	AT4G20940.1	Ara1	5183	5545	5185	65	43	50	83	26	59	2.95	-1.95	0.00032144	1	-0.259335	0
OG0003978	AT4G37630.1	Ara1	1615	1665	1600	20	33	13	31	28	18	0.989011	0.010989	1	1	0.00263505	0
OG0003980	AT4G33470.1	Ara1	2115	3775	2115	42	26	23	26	28	28	1.82609	-0.826087	0.139633	1	-0.146154	0
OG0003981	AT3G04380.1	Ara1	2460	2720	2460	30	57	13	37	40	25	1.44231	-0.442308	0.416655	1	-0.0822898	0
OG0003982	AT3G07930.1	Ara1	1760	2380	1740	76	73	19	18	36	7	0.777778	0.222222	0.814499	1	0.0372093	0
OG0003983	AT2G05210.3	Ara1	2335	3630	2325	44	91	16	32	47	35	2.04787	-1.04787	0.0538244	1	-0.160163	0
OG0003984	AT1G53570.2	Ara1	3045	3075	2985	22	27	31	41	33	24	0.516129	0.483871	0.126505	1	0.163853	0
OG0003985	AT5G40600.1	variable	1625	1760	1520	37	55	5	7	38	13	2.53158	-1.53158	0.119165	1	-0.135854	0
OG0003986	AT3G53310.1	Ara1	1430	1455	1380	22	40	6	10	85	32	1.38039	-0.380392	0.636004	1	-0.0592186	0
OG0003987	AT1G33230.1	Ara1	1735	1740	1730	12	9	29	33	5	21	1.73793	-0.737931	0.403151	0	-0.100375	0
OG0003988	AT4G03560.1	Ara1	3665	3665	3660	20	31	44	59	11	34	1.40496	-0.404959	0.520238	1	-0.0680556	0
OG0003989	AT4G12540.1	Ara1	2305	2465	2120	52	240	10	19	21	4	0.990476	0.00952381	1	1	0.00129032	0
OG0003990	AT1G05910.1	Ara1	6050	6095	6045	43	66	24	100	55	81	2.63864	-1.63864	0.00171307	1	-0.237379	0
OG0003991	AT5G67410.1	Ara1	1435	1610	1410	26	38	4	29	22	9	2.65909	-1.65909	0.211272	1	-0.156989	0
OG0003992	AT1G68890.1	Ara1	8575	8605	8570	151	134	81	106	72	59	1.52761	-0.527606	0.0722342	1	-0.101244	0
OG0003993	AT5G41880.1	Ara1	2254	2540	2250	74	27	42	38	20	21	1.85	-0.85	0.0991243	1	-0.150126	0
OG0003994	AT2G03060.1	Ara1	1905	1910	1865	42	28	8	14	17	13	4.01471	-3.01471	0.00953698	1	-0.273333	0
OG0003995	AT5G24318.1	Ara1	2290	2330	2285	74	75	33	50	27	27	2.24242	-1.24242	0.0244792	1	-0.191589	0
OG0003996	AT5G61330.1	variable	2180	2850	2180	44	59	14	29	34	26	2.40336	-1.40336	0.0332585	1	-0.191954	0
OG0003997	AT3G28030.1	Ara1	7411	7590	7385	222	280	69	131	72	43	1.9215	-0.921498	0.00670084	1	-0.1368	0
OG0003998	AT1G18950.1	Ara1	3750	3820	3745	39	46	26	50	34	50	2.20588	-1.20588	0.0212212	1	-0.195238	0
OG0003999	AT3G55470.1	Ara1	780	780	780	4	5	11	14	7	8	0.415584	0.584416	0.449725	1	0.2	0
OG0004001	AT2G14680.1	Ara1	3145	3145	3145	70	67	28	35	34	28	2.05882	-1.05882	0.0412009	1	-0.165899	0
OG0004002	AT5G38510.1	Ara1	2170	2195	2165	73	37	41	26	25	17	1.21073	-0.210732	0.709124	1	-0.0451128	0
OG0004003	AT5G56900.2	Ara1	2020	2980	2015	35	19	14	21	11	22	5	-4	0.00130775	1	-0.380952	1
OG0004004	AT5G62180.1	Ara1	1634	1655	1630	44	52	12	32	41	29	2.5935	-1.5935	0.0217446	1	-0.2	0
OG0004005	AT2G31900.1	Ara1	7780	7780	7780	89	70	74	78	59	85	1.73271	-0.732707	0.0219583	1	-0.13629	0
OG0004006	AT1G18630.1	Ara1	775	820	775	6	12	7	9	13	13	0.857143	0.142857	1	1	0.0384615	0
OG0004007	AT5G26850.1	Ara1	4913	4945	4915	105	49	78	67	22	38	2.32517	-1.32517	0.00711466	1	-0.207104	0
OG0004008	AT4G20870.1	Ara1	1185	1185	1185	22	5	25	12	3	6	1.76	-0.76	0.716291	1	-0.134752	0
OG0004009	AT3G14020.1	variable	1540	1595	1530	28	27	9	20	29	15	1.6092	-0.609195	0.464322	1	-0.0976658	0
OG0004011	AT5G04090.2	Ara1	1320	1785	1320	26	38	7	9	35	17	1.80408	-0.804082	0.325504	1	-0.114802	0
OG0004012	AT2G20830.1	Ara1	1485	2235	1485	23	17	11	20	9	21	4.87879	-3.87879	0.00543384	1	-0.376471	0
OG0004013	AT4G02020.1	Ara1	4279	5235	4255	43	74	31	50	56	42	1.04032	-0.0403226	1	1	-0.00965251	0
OG0004014	AT5G48720.1	Ara1	1330	1730	1330	21	22	19	24	10	15	1.65789	-0.657895	0.444643	1	-0.125	0
OG0004015	AT2G27580.1	variable	815	880	815	13	47	5	22	7	11	4.08571	-3.08571	0.0922152	0	-0.333333	0
OG0004016	AT5G40840.1	Ara1	4044	4080	4045	153	161	46	52	46	26	1.87996	-0.879962	0.0424842	1	-0.129955	0
OG0004017	AT1G64570.1	Ara1	6193	6355	6175	149	152	57	75	93	48	1.34918	-0.349179	0.234368	0	-0.0637265	0
OG0004018	AT3G03410.1	Ara1	655	655	655	13	11	9	16	12	6	0.722222	0.277778	0.747016	1	0.0757576	0
OG0004020	AT4G22550.1	Ara1	1065	1240	1065	25	28	3	27	15	6	3.33333	-2.33333	0.145971	1	-0.178571	0
OG0004021	AT1G64050.1	Ara1	3340	3560	3320	35	155	6	18	7	4	3.33333	-2.33333	0.189732	1	-0.217295	0
OG0004022	AT5G66060.1	Ara1	1445	1445	1445	26	9	22	21	3	8	3.15152	-2.15152	0.18058	1	-0.268939	0
OG0004024	AT2G31130.1	Ara1	2095	2940	2095	32	77	2	32	49	20	6.53061	-5.53061	0.00928788	1	-0.231032	0
OG0004025	AT5G20300.1	Ara1	3965	3965	3930	82	81	38	80	28	14	1.07895	-0.0789474	0.849608	1	-0.0166667	0
OG0004026	AT3G42630.1	Ara1	2075	2120	2075	72	70	22	32	36	26	2.36364	-1.36364	0.0207321	1	-0.185312	0
OG0004027	AT3G19290.1	Ara1	2155	2275	2140	37	39	16	35	26	18	1.60096	-0.600962	0.292684	1	-0.107204	0
OG0004030	AT1G53490.1	Ara1	1520	1520	1520	20	17	18	18	4	13	3.61111	-2.61111	0.0762528	1	-0.291022	0
OG0004031	AT1G16330.1	Ara1	3240	3250	3225	50	97	14	58	49	35	2.55102	-1.55102	0.0136343	1	-0.197917	0
OG0004034	AT1G66760.2	Ara1	2330	2430	2330	32	38	34	56	13	20	1.44796	-0.447964	0.521063	0	-0.0909091	0
OG0004035	AT5G22110.1	Ara1	2630	2730	2625	47	31	30	31	21	19	1.41746	-0.41746	0.431596	0	-0.0853896	0
OG0004036	AT5G18240.4	Ara1	2010	2015	2010	30	22	22	21	12	15	1.70455	-0.704545	0.342915	1	-0.132479	0
OG0004037	AT1G67900.1	variable	3155	3155	3150	43	28	20	61	23	49	4.58043	-3.58043	3.15619e-05	1	-0.363095	0
OG0004038	AT3G08980.1	Ara1	770	770	770	15	5	7	11	12	4	0.714286	0.285714	0.729159	1	0.0681818	0
OG0004039	AT4G00060.1	Ara1	7405	7500	7375	97	105	36	93	84	77	2.46991	-1.46991	0.000298361	1	-0.207584	0
OG0004040	AT3G50670.1	Ara1	2135	2165	2115	31	21	25	42	14	27	2.39143	-1.39143	0.04256	1	-0.212108	0
OG0004041	AT5G46460.1	Ara1	3484	3505	3485	73	115	33	58	27	20	1.63861	-0.638608	0.198934	0	-0.114211	0
OG0004043	AT3G16670.1	Ara1	770	780	755	8	17	3	5	12	1	0.222222	0.777778	0.300207	1	0.195804	0
OG0004044	AT3G17700.1	variable	3820	3845	3800	25	57	24	83	33	36	1.13636	-0.136364	0.851972	0	-0.0319432	0
OG0004045	AT5G49150.1	Ara1	4570	5465	4570	125	90	50	67	61	56	2.29508	-1.29508	0.0011884	1	-0.192918	0
OG0004046	AT4G00690.1	variable	1705	1910	1700	40	105	15	20	57	9	0.421053	0.578947	0.0704688	1	0.136364	0
OG0004047	AT5G26810.1	Ara1	1693	1735	1695	35	74	19	24	29	14	0.889292	0.110708	0.831768	1	0.0262705	0
OG0004048	AT4G14147.1	Ara1	845	2370	845	12	27	12	16	3	9	3	-2	0.282128	1	-0.25	0
OG0004050	AT3G03090.1	Ara1	2515	2515	2510	15	31	28	29	24	30	0.669643	0.330357	0.406598	1	0.0956072	0
OG0004051	AT4G31210.1	Ara1	6420	6535	6420	55	100	35	65	91	62	1.07064	-0.0706436	0.892207	1	-0.0163399	0
OG0004052	AT4G34310.1	Ara1	6139	6140	6140	75	70	58	88	47	64	1.76082	-0.760822	0.0394648	1	-0.140486	0
OG0004053	AT2G34630.1	Ara1	1604	2110	1605	8	3	28	23	5	9	0.514286	0.485714	0.473705	1	0.134921	0
OG0004054	AT5G10030.1	Ara1	1820	1820	1820	14	18	7	18	10	22	4.4	-3.4	0.0229254	1	-0.354167	0
OG0004055	AT2G27880.1	Ara1	4983	5195	4970	70	184	33	103	104	77	1.57051	-0.570513	0.0994419	1	-0.105026	0
OG0004056	AT3G19300.1	Ara1	3315	3320	3310	47	56	25	49	52	46	1.66308	-0.663077	0.118615	1	-0.122166	0
OG0004057	AT3G58650.1	Ara1	4100	4105	4085	50	55	27	59	42	30	1.32275	-0.322751	0.500126	1	-0.0660173	0
OG0004062	AT3G10440.1	variable	2860	3360	2745	41	96	11	30	81	19	0.874299	0.125701	0.830627	1	0.0215385	0
OG0004063	AT3G21250.1	variable	7265	7400	7265	96	92	69	103	67	96	1.99351	-0.993511	0.00206659	1	-0.170775	0
OG0004066	AT5G19710.1	variable	570	575	570	17	15	5	6	6	1	0.566667	0.433333	1	1	0.0844156	0
OG0004071	AT5G38130.1	variable	2308	2320	2310	103	94	38	25	30	11	0.99386	0.00614035	1	1	0.00121086	0
OG0004072	AT5G48945.1	variable	455	455	445	13	27	2	4	26	5	1.25	-0.25	1	1	-0.027957	0
OG0004074	AT4G09670.1	variable	1810	1810	1810	37	27	30	40	9	22	3.01481	-2.01481	0.0179574	0	-0.261916	0
OG0004075	AT4G19960.1	variable	4115	4205	4030	39	53	79	78	32	49	0.755934	0.244066	0.36938	1	0.0645533	0
OG0004076	AT1G78430.1	variable	1620	1770	1620	31	48	8	17	30	27	3.4875	-2.4875	0.00946459	1	-0.268556	0
OG0004082	AT3G04490.1	variable	5590	5835	5590	74	41	26	69	20	46	6.54615	-5.54615	3.27419e-08	1	-0.43697	0
OG0004083	AT1G68300.1	Ara1	800	800	800	7	14	9	9	14	8	0.444444	0.555556	0.324262	1	0.198864	0
OG0004084	AT1G05070.1	Ara1	919	955	920	21	7	7	11	10	15	4.5	-3.5	0.0131464	1	-0.35	0
OG0004085	AT3G10030.1	Ara1	2710	4405	2700	15	19	17	35	15	57	3.35294	-2.35294	0.00985117	0	-0.260417	0
OG0004086	AT2G14820.1	variable	3170	3170	3170	66	45	57	53	24	35	1.6886	-0.688596	0.114781	1	-0.129806	0
OG0004087	AT4G24390.1	variable	3114	3150	3115	51	47	33	44	40	42	1.62273	-0.622727	0.16025	0	-0.119338	0
OG0004088	AT2G43510.1	variable	445	455	445	2	10	3	7	3	6	1.33333	-0.333333	1	0	-0.0666667	0
OG0004089	AT4G05090.1	Ara1	1985	2045	1985	61	55	25	28	25	20	1.952	-0.952	0.085288	1	-0.153747	0
OG0004090	AT5G13810.1	Ara1	1370	1380	1365	18	17	9	51	14	19	2.71429	-1.71429	0.0738191	1	-0.242424	0
OG0004092	AT1G56160.1	Ara1	1480	1575	1480	22	33	13	21	21	5	0.40293	0.59707	0.162507	1	0.179121	0
OG0004093	AT5G13560.1	Ara1	3395	3400	3385	39	35	14	35	34	54	4.42437	-3.42437	6.17129e-05	0	-0.349485	0
OG0004094	AT3G20250.1	Ara1	4565	4760	4560	64	41	27	51	50	54	2.56	-1.56	0.00216602	1	-0.222527	0
OG0004095	AT5G46160.2	Ara1	865	1245	865	12	15	6	31	4	13	6.5	-5.5	0.0175921	1	-0.431373	0
OG0004096	AT3G53090.1	Ara1	5710	5710	5710	101	78	51	80	41	34	1.64228	-0.642276	0.108506	1	-0.117807	0
OG0004098	AT5G58240.1	Ara1	900	905	895	9	13	6	10	2	12	9	-8	0.0209395	1	-0.457143	0
OG0004099	AT5G15910.1	Ara1	1345	1590	1345	21	11	11	13	11	19	3.29752	-2.29752	0.041093	1	-0.289583	0
OG0004100	AT3G48710.1	Ara1	2310	2510	2305	60	68	22	26	49	17	0.946197	0.0538033	1	1	0.0107169	0
OG0004101	AT5G51790.1	Ara1	1019	1025	1020	21	18	10	17	11	9	1.71818	-0.718182	0.389176	1	-0.127419	0
OG0004102	AT5G04420.3	Ara1	2571	2585	2570	41	24	11	27	23	35	5.67194	-4.67194	4.03946e-05	1	-0.39191	0
OG0004103	AT2G43760.3	Ara1	990	1175	985	15	9	3	14	6	15	12.5	-11.5	0.00107336	1	-0.547619	0
OG0004104	AT4G36640.1	Ara1	1470	1470	1465	12	23	12	32	28	17	0.607143	0.392857	0.443098	1	0.122222	0
OG0004105	AT5G06265.1	Ara1	529	530	520	10	7	6	10	7	6	1.42857	-0.428571	0.716292	1	-0.0865385	0
OG0004106	AT4G15970.1	variable	1789	3270	1610	56	59	25	18	59	13	0.493559	0.506441	0.0911684	0	0.128086	0
OG0004107	AT3G33530.1	Ara1	6724	6740	6630	130	68	82	96	44	81	2.91851	-1.91851	3.66984e-06	1	-0.261208	0
OG0004108	AT2G03620.1	Ara1	2105	2105	2105	27	18	54	35	6	16	1.33333	-0.333333	0.797195	1	-0.0606061	0
OG0004109	AT1G22910.1	Ara1	1244	1290	1245	20	20	16	23	12	13	1.35417	-0.354167	0.609656	1	-0.0755556	0
OG0004110	AT4G23515.1	variable	1585	1610	1585	38	142	10	13	38	13	1.3	-0.3	0.63935	1	-0.0465686	0
OG0004111	AT1G01370.1	variable	890	900	885	5	37	5	16	28	6	0.214286	0.785714	0.0898757	1	0.323529	0
OG0004112	AT4G24610.1	Ara1	5750	5765	5750	77	43	53	84	29	67	3.35654	-2.35654	1.59464e-05	1	-0.290224	0
OG0004113	AT1G44170.2	variable	2420	2420	2420	22	32	41	61	23	49	1.14316	-0.14316	0.718942	0	-0.0297619	0
OG0004114	AT5G58330.1	Ara1	2215	2215	2210	11	15	10	41	6	20	3.66667	-2.66667	0.0659322	1	-0.29304	0
OG0004115	AT5G27450.1	Ara1	1890	1890	1890	28	29	23	36	13	15	1.40468	-0.404682	0.490765	1	-0.0847339	0
OG0004116	AT2G21385.1	Ara1	1650	2270	1645	19	24	3	22	5	18	22.8	-21.8	1.7822e-05	1	-0.646245	0
OG0004117	AT2G39300.1	Ara1	4185	4375	4170	63	113	25	60	59	51	2.17831	-1.17831	0.0123444	1	-0.179545	0
OG0004118	AT2G25720.1	variable	585	595	585	5	6	4	14	17	10	0.735294	0.264706	0.711513	0	0.0740741	0
OG0004119	AT1G43850.1	Ara1	4384	4730	4365	63	35	55	60	32	57	2.04034	-1.04034	0.0164969	1	-0.174348	0
OG0004121	AT1G53800.2	Ara1	2840	2915	2840	38	26	27	29	33	25	1.06622	-0.0662177	1	1	-0.0156499	0
OG0004123	AT1G21580.1	Ara1	10829	11195	10740	167	262	42	104	242	89	1.46232	-0.462318	0.0800689	1	-0.0679252	0
OG0004124	AT5G48330.1	Ara1	2275	2310	2270	54	50	20	41	31	25	2.17742	-1.17742	0.0421408	1	-0.176158	1
OG0004125	AT5G49215.2	Ara1	2245	2255	2235	37	45	29	32	53	30	0.722186	0.277814	0.399718	1	0.0779482	0
OG0004126	AT5G17570.1	Ara1	1625	1955	1570	24	29	7	25	25	20	2.74286	-1.74286	0.0564711	1	-0.218638	0
OG0004127	AT5G47090.1	variable	1550	1605	1500	29	18	7	20	23	21	3.78261	-2.78261	0.0101039	0	-0.282828	0
OG0004128	AT1G74310.1	variable	4555	4565	4550	47	26	70	105	13	71	3.66703	-2.66703	0.000160119	0	-0.246947	0
OG0004129	AT3G51830.1	Ara1	2940	3040	2940	34	60	20	45	38	27	1.20789	-0.207895	0.707293	1	-0.0450142	0
OG0004130	AT2G28340.1	Ara1	1453	1565	1360	49	42	9	14	65	17	1.42393	-0.423932	0.511706	1	-0.0521447	0
OG0004131	AT1G75560.1	variable	1285	1450	1265	14	13	10	17	19	23	1.69474	-0.694737	0.443096	0	-0.130952	0
OG0004132	AT4G32520.1	Ara1	2645	2645	2645	19	30	26	44	17	28	1.20362	-0.20362	0.829826	1	-0.0444444	0
OG0004133	AT5G50110.1	variable	1460	1460	1405	27	19	15	22	11	21	3.43636	-2.43636	0.0183225	0	-0.299107	0
OG0004134	AT1G79640.1	Ara1	3420	3420	3400	29	13	13	41	27	52	4.2963	-3.2963	0.000290204	1	-0.348704	0
OG0004135	AT1G01010.1	Ara1	2145	2620	2130	30	121	6	35	36	18	2.5	-1.5	0.0934421	1	-0.166667	0
OG0004136	AT1G77090.1	Ara1	1300	1420	1280	16	13	7	18	27	15	1.26984	-0.269841	0.786604	0	-0.052795	0
OG0004138	AT5G15540.1	Ara1	9230	9235	9230	111	108	54	119	100	85	1.74722	-0.747222	0.0121589	1	-0.132187	0
OG0004139	AT5G51230.2	Ara1	3155	3185	3155	30	28	24	63	15	29	2.41667	-1.41667	0.0424802	1	-0.214646	0
OG0004140	AT3G48880.2	Ara1	1545	1700	1545	7	16	21	19	17	20	0.392157	0.607843	0.119939	1	0.209459	0
OG0004141	AT4G35920.1	Ara1	2105	2105	2105	19	11	13	39	9	25	4.05983	-3.05983	0.0121376	1	-0.329044	0
OG0004142	AT1G48620.1	variable	2395	2485	2345	50	57	16	29	52	27	1.6226	-0.622596	0.206702	0	-0.0993479	0
OG0004143	AT5G11610.1	Ara1	2729	2880	2715	47	67	21	47	56	51	2.03827	-1.03827	0.0400998	1	-0.167812	0
OG0004145	AT3G48810.1	Ara1	3295	3295	3260	60	47	27	39	38	40	2.33918	-1.33918	0.0109534	1	-0.202476	0
OG0004146	AT1G24480.1	Ara1	1193	1225	1195	26	29	18	20	8	18	3.25	-2.25	0.0275538	1	-0.283217	0
OG0004148	AT4G38350.1	Ara1	6365	7020	6355	64	59	59	60	62	62	1.08475	-0.0847458	0.799502	1	-0.0203252	0
OG0004149	AT2G17210.1	variable	3680	6650	3680	73	112	26	58	63	36	1.6044	-0.604396	0.167593	1	-0.10101	0
OG0004150	AT4G12750.1	Ara1	5584	5615	5585	149	108	54	64	60	40	1.83951	-0.839506	0.0244171	1	-0.13399	0
OG0004151	AT1G45150.1	Ara1	3215	3230	3215	73	32	45	45	15	35	3.78519	-2.78519	0.000187539	1	-0.318644	0
OG0004152	AT5G18120.1	Ara1	1445	1450	1445	39	33	7	15	23	13	3.14907	-2.14907	0.0388219	1	-0.208937	0
OG0004153	AT3G07565.3	Ara1	1290	1300	1290	10	9	13	20	12	13	0.833333	0.166667	0.77993	1	0.0452174	0
OG0004154	AT2G45670.1	variable	2695	3660	2695	15	55	26	52	18	29	0.929487	0.0705128	1	1	0.0171251	0
OG0004155	AT5G04620.2	variable	1715	2500	1715	17	16	11	34	9	15	2.57576	-1.57576	0.163707	1	-0.232143	0
OG0004156	AT1G23740.1	Ara1	1930	1935	1930	45	27	23	35	20	22	2.15217	-1.15217	0.0725652	0	-0.185574	0
OG0004157	AT4G09020.1	Ara1	3821	3835	3820	74	61	29	62	24	34	3.61494	-2.61494	0.000200068	0	-0.304653	0
OG0004158	AT1G71900.1	variable	1715	1720	1715	4	7	12	20	7	22	1.04762	-0.047619	1	1	-0.00862069	0
OG0004159	AT3G47660.1	Ara1	4767	4870	4750	122	55	71	56	63	68	1.85468	-0.854684	0.00848844	1	-0.151208	0
OG0004160	AT3G60350.1	Ara1	4639	4640	4635	46	40	23	53	63	47	1.49206	-0.492063	0.270659	1	-0.0939394	0
OG0004161	AT1G14790.1	variable	5535	6235	5535	83	109	55	82	57	61	1.61499	-0.614992	0.060434	0	-0.118398	0
OG0004162	AT1G24260.1	Ara1	1250	1265	1250	7	5	15	17	1	5	2.33333	-1.33333	0.639911	1	-0.151515	0
OG0004164	AT1G53720.1	Ara1	2530	3160	2530	37	64	18	44	20	24	2.46667	-1.46667	0.0406113	1	-0.218182	0
OG0004167	AT2G27250.1	variable	470	500	450	11	18	2	3	49	10	1.12245	-0.122449	1	0	-0.0156454	0
OG0004169	AT1G59890.1	Ara1	5809	5950	5810	135	92	60	65	81	59	1.63889	-0.638889	0.0372965	1	-0.113736	0
OG0004170	AT1G13110.1	variable	2520	2530	2520	32	120	13	94	32	26	2	-1	0.106949	0	-0.159387	0
OG0004171	AT5G13790.1	Ara1	1327	1535	1260	501	9	10	3	9	1	5.56667	-4.56667	0.193684	1	-0.0804305	0
OG0004172	AT5G42740.1	variable	2800	2800	2800	44	28	35	44	18	40	2.79365	-1.79365	0.00539496	0	-0.246617	0
OG0004173	AT1G64480.1	Ara1	1071	1075	1070	22	10	17	22	4	6	1.94118	-0.941176	0.482574	1	-0.164103	0
OG0004175	AT2G43540.1	Ara1	845	1250	845	16	185	5	12	10	4	1.28	-0.28	1	1	-0.047619	0
OG0004176	AT1G80770.1	Ara1	2255	2325	2255	23	19	13	38	23	24	1.84615	-0.846154	0.189896	0	-0.149527	0
OG0004177	AT1G10450.1	Ara1	5610	5690	5605	64	112	33	63	122	51	0.81073	0.18927	0.493756	1	0.0454085	0
OG0004178	AT2G31870.2	Ara1	2740	2785	2740	43	70	28	45	25	27	1.65857	-0.658571	0.200494	0	-0.124865	0
OG0004179	AT3G55690.1	Ara1	1465	1535	1460	24	41	8	27	50	11	0.66	0.34	0.431352	1	0.0696721	0
OG0004180	AT5G25520.2	Ara1	3675	5135	3660	55	110	16	58	68	22	1.11213	-0.112132	0.852686	1	-0.0190923	0
OG0004181	AT4G13720.1	variable	1030	1445	1030	31	6	18	10	5	15	5.16667	-4.16667	0.00708952	1	-0.382653	0
OG0004182	AT5G37290.1	Ara1	900	900	900	25	16	16	15	5	3	0.9375	0.0625	1	1	0.0152439	0
OG0004184	AT4G23770.1	Ara1	689	830	690	8	39	4	4	36	10	0.555556	0.444444	0.457448	1	0.115942	0
OG0004185	AT3G16160.1	Ara1	1840	2890	1835	30	192	4	37	43	12	2.09302	-1.09302	0.269461	1	-0.100535	0
OG0004186	AT3G07180.1	variable	2995	3020	2995	44	53	23	39	24	30	2.3913	-1.3913	0.0268003	0	-0.212272	0
OG0004187	AT3G20210.1	Ara1	2330	2340	2325	29	53	18	32	49	22	0.723356	0.276644	0.433059	0	0.0731196	0
OG0004188	AT3G42660.1	Ara1	4764	4770	4755	157	77	69	71	43	46	2.43411	-1.43411	0.000677667	1	-0.211544	0
OG0004189	AT2G33210.1	Ara1	2925	2930	2910	22	20	44	58	16	19	0.59375	0.40625	0.281373	0	0.12381	0
OG0004190	AT5G60330.1	variable	829	950	810	25	102	4	18	2	4	12.5	-11.5	0.0160859	1	-0.528736	0
OG0004191	AT3G07940.1	Ara1	1925	2005	1915	17	17	8	39	9	15	3.54167	-2.54167	0.0464799	1	-0.305	0
OG0004194	AT1G74860.1	Ara1	2000	2395	2000	27	41	9	23	42	16	1.14286	-0.142857	0.81539	1	-0.0258621	0
OG0004195	AT4G36600.1	Ara1	1765	2390	1765	61	73	17	23	20	15	2.69118	-1.69118	0.0259137	0	-0.210623	0
OG0004196	AT5G23535.1	variable	795	795	795	10	2	9	19	2	8	4.44444	-3.44444	0.126077	0	-0.326316	0
OG0004197	AT5G44070.1	Ara1	2425	2425	2425	16	39	18	59	9	25	2.46914	-1.46914	0.130556	0	-0.205882	0
OG0004198	AT1G02950.2	Ara1	1215	1300	1215	13	26	5	17	20	13	1.69	-0.69	0.543171	1	-0.116162	0
OG0004199	AT2G46830.1	Ara1	3040	3125	3025	58	91	21	44	42	28	1.84127	-0.84127	0.115437	1	-0.134177	0
OG0004200	AT5G42400.1	Ara1	6939	6980	6940	202	221	49	78	145	53	1.50683	-0.506826	0.0709023	1	-0.0724576	0
OG0004201	AT5G41190.1	Ara1	3010	3085	3005	72	54	42	47	18	13	1.2381	-0.238095	0.67773	0	-0.0509338	0
OG0004202	AT3G13850.1	variable	1340	1680	1335	29	17	11	18	10	16	4.21818	-3.21818	0.00994469	1	-0.340385	0
OG0004204	AT2G19280.1	Ara1	3464	3550	3440	75	123	17	44	40	33	3.63971	-2.63971	0.00030241	1	-0.267272	0
OG0004205	AT5G38730.1	Ara1	2980	3030	2980	81	64	32	53	35	32	2.31429	-1.31429	0.0101627	0	-0.194426	0
OG0004207	AT4G11420.1	Ara1	4935	5055	4935	50	58	67	60	51	53	0.775534	0.224466	0.417095	1	0.0630342	0
OG0004208	AT5G23890.1	Ara1	4730	4750	4665	96	109	37	67	78	45	1.49688	-0.496881	0.142335	1	-0.0876582	0
OG0004210	AT3G13710.1	Ara1	1480	2010	1390	22	16	9	13	24	22	2.24074	-1.24074	0.154645	1	-0.187938	0
OG0004211	AT5G16715.1	Ara1	4870	4880	4865	36	33	35	81	14	41	3.01224	-2.01224	0.00570121	1	-0.252497	0
OG0004212	AT4G34660.1	Ara1	1840	1915	1840	16	6	15	41	4	18	4.8	-3.8	0.0209165	1	-0.334311	0
OG0004213	AT1G30970.1	Ara1	1835	1840	1820	28	14	13	15	20	16	1.72308	-0.723077	0.346086	1	-0.127371	0
OG0004214	AT4G14010.1	Ara1	584	585	580	19	19	8	10	4	7	4.15625	-3.15625	0.0733204	1	-0.340067	0
OG0004215	AT3G24740.1	Ara1	1770	1770	1770	24	24	16	23	24	8	0.5	0.5	0.214804	1	0.15	0
OG0004217	AT5G25480.1	Ara1	1915	1915	1915	31	26	14	29	17	21	2.73529	-1.73529	0.0439756	1	-0.24152	0
OG0004218	AT1G07050.1	Ara1	975	975	970	6	19	5	12	12	9	0.9	0.1	1	1	0.025974	0
OG0004219	AT1G12800.1	variable	3835	3870	3830	52	90	27	58	40	29	1.3963	-0.396296	0.396057	0	-0.0785177	0
OG0004220	AT1G53110.1	Ara1	2194	2340	2195	48	55	14	19	62	30	1.65899	-0.658986	0.205467	1	-0.100281	0
OG0004221	AT2G22420.1	Ara1	1645	1660	1645	28	43	14	50	8	15	3.75	-2.75	0.0191124	1	-0.318841	0
OG0004222	AT3G16190.1	Ara1	980	1045	980	18	18	10	16	16	16	1.8	-0.8	0.30523	1	-0.142857	0
OG0004223	AT1G21840.1	Ara1	1200	1220	1200	20	27	17	19	15	18	1.41176	-0.411765	0.632389	1	-0.0859951	0
OG0004224	AT2G29210.1	Ara1	4390	4485	4150	136	137	39	57	101	44	1.51917	-0.519167	0.124052	1	-0.0805911	0
OG0004226	AT2G46200.1	Ara1	1912	1930	1910	37	42	13	23	23	16	1.97993	-0.979933	0.172719	1	-0.150256	0
OG0004227	AT1G31840.1	Ara1	4198	4230	4185	168	131	45	52	51	22	1.61046	-0.610458	0.148869	1	-0.0901023	0
OG0004228	AT1G44910.1	Ara1	4790	4835	4785	111	60	61	60	52	48	1.6797	-0.679697	0.0540305	1	-0.125349	0
OG0004229	AT1G35140.1	variable	1545	1550	1545	40	50	10	45	14	19	5.42857	-4.42857	0.000825339	1	-0.375758	0
OG0004230	AT3G07300.2	Ara1	2035	2035	2035	5	6	10	32	6	32	2.66667	-1.66667	0.257529	1	-0.175439	0
OG0004231	AT5G57230.1	Ara1	800	800	800	13	2	6	8	3	9	6.5	-5.5	0.0290081	1	-0.434211	0
OG0004232	AT5G53220.2	Ara1	1837	2870	1815	51	99	15	28	40	13	1.105	-0.105	0.83125	1	-0.0180103	0
OG0004234	AT4G02110.1	variable	6643	6800	6635	182	217	44	79	112	47	1.7358	-0.735795	0.0280218	0	-0.100907	0
OG0004235	AT3G16370.1	Ara1	1765	1765	1765	31	15	25	21	20	23	1.426	-0.426	0.421875	0	-0.0884551	0
OG0004236	AT5G27560.1	Ara1	1705	1855	1695	23	26	12	15	15	23	2.93889	-1.93889	0.0350817	1	-0.262406	0
OG0004238	AT4G22670.1	Ara1	2205	2265	2175	26	31	31	44	12	21	1.46774	-0.467742	0.507136	1	-0.092504	0
OG0004239	AT1G06230.1	Ara1	3830	3935	3830	38	44	32	43	49	40	0.969388	0.0306122	1	1	0.00770465	0
OG0004240	AT2G45350.1	variable	3019	3485	3035	1237	47	18	2	18	0	0	1	1	0	0.0143426	0
OG0004241	AT1G71810.1	Ara1	3460	3520	3460	38	43	18	44	26	45	3.65385	-2.65385	0.000648088	1	-0.312374	0
OG0004242	AT2G41890.1	Ara1	3819	3835	3790	34	50	18	67	46	46	1.88889	-0.888889	0.0831699	1	-0.153846	0
OG0004243	AT5G28050.1	Ara1	925	925	925	0	5	16	21	2	15	0	1	0.484848	1	0.117647	0
OG0004244	AT1G13860.3	Ara1	2979	3515	3010	1185	49	46	0	8	0	0	1	1	1	0.037368	0
OG0004245	AT4G19020.1	Ara1	6475	7195	6240	196	230	77	78	79	26	0.837745	0.162255	0.522267	1	0.0344322	0
OG0004246	AT5G24630.1	Ara1	2255	2285	2025	33	46	13	18	47	18	0.972177	0.0278232	1	1	0.00568562	0
OG0004247	AT3G05690.1	Ara1	1475	1845	1470	16	30	9	21	23	19	1.4686	-0.468599	0.609289	1	-0.092381	0
OG0004248	AT3G44830.1	variable	3325	3335	3320	182	77	64	67	32	19	1.68848	-0.688477	0.122769	0	-0.112386	0
OG0004249	AT5G58940.1	variable	2349	2440	2350	39	51	16	27	22	22	2.4375	-1.4375	0.0394843	0	-0.209091	0
OG0004250	AT2G47820.1	Ara1	4024	4075	3945	45	86	13	44	95	48	1.74899	-0.748988	0.130745	1	-0.111526	0
OG0004251	AT3G01435.1	Ara1	575	640	575	6	6	13	10	1	4	1.84615	-0.846154	1	1	-0.115789	0
OG0004252	AT2G17650.1	Ara1	3015	3015	3010	92	62	52	57	27	26	1.7037	-0.703704	0.104111	1	-0.129455	0
OG0004253	AT3G51730.1	Ara1	1065	1065	1065	21	14	10	23	14	13	1.95	-0.95	0.284628	1	-0.158901	0
OG0004254	AT3G23840.1	variable	2099	2105	2100	82	71	19	40	36	16	1.91813	-0.918129	0.107145	1	-0.119573	0
OG0004255	AT4G00900.1	Ara1	5269	5280	5270	74	62	81	119	14	47	3.06702	-2.06702	0.0011311	1	-0.247911	0
OG0004256	AT1G12260.1	Ara1	1975	1975	1975	28	12	14	27	4	19	9.5	-8.5	0.000211329	1	-0.492754	0
OG0004257	AT4G31610.1	Ara1	2584	2695	2580	49	65	19	23	77	22	0.736842	0.263158	0.465188	1	0.0571895	0
OG0004259	AT4G04320.2	Ara1	2590	3935	2585	82	32	37	42	16	16	2.21622	-1.21622	0.0604211	1	-0.189076	0
OG0004260	AT3G57680.1	Ara1	2594	2600	2595	34	48	18	32	33	39	2.23232	-1.23232	0.0442384	1	-0.195513	0
OG0004261	AT3G17010.1	variable	1510	1655	1490	29	76	7	16	73	12	0.681018	0.318982	0.585105	0	0.053268	0
OG0004262	AT5G48040.1	Ara1	2109	2110	2085	47	53	24	44	20	14	1.37083	-0.370833	0.518093	1	-0.0737365	0
OG0004263	AT1G54840.1	Ara1	1745	1825	1740	40	71	10	21	34	6	0.705882	0.294118	0.590069	0	0.05	0
OG0004264	AT2G46270.1	Ara1	1910	1910	1900	21	26	10	28	18	15	1.75	-0.75	0.314977	1	-0.131965	0
OG0004265	AT3G26140.1	Ara1	2539	4650	2540	77	33	48	40	26	12	0.740385	0.259615	0.565002	0	0.0682105	0
OG0004267	AT3G02260.1	Ara1	25489	25530	25465	248	212	143	330	185	276	2.58734	-1.58734	1.31861e-11	1	-0.23297	0
OG0004269	AT1G76940.1	variable	1165	1240	1130	13	17	7	15	17	19	2.07563	-1.07563	0.266888	0	-0.177778	0
OG0004270	AT4G17910.1	Ara1	2170	2350	2165	55	37	32	36	27	24	1.52778	-0.527778	0.282229	1	-0.102772	0
OG0004271	AT1G31720.1	Ara1	960	1295	920	350	28	12	1	3	0	0	1	1	1	0.0331492	0
OG0004272	AT1G55830.1	Ara1	2060	2480	2060	22	59	9	29	45	19	1.0321	-0.0320988	1	1	-0.00655242	0
OG0004273	AT5G48650.1	variable	2290	2335	2280	68	91	23	28	39	12	0.909699	0.090301	1	1	0.0174531	0
OG0004274	AT4G00800.1	variable	9563	9705	9565	168	149	106	123	104	75	1.14296	-0.142961	0.556172	0	-0.0321331	0
OG0004275	AT5G08415.1	variable	1970	1975	1970	22	11	7	29	8	20	7.85714	-6.85714	0.000516072	1	-0.472906	0
OG0004276	AT5G15180.1	variable	1645	1645	1645	23	39	12	25	18	23	2.44907	-1.44907	0.0682309	1	-0.218118	0
OG0004277	AT4G32760.1	Ara1	3375	3415	3365	37	35	25	42	36	35	1.43889	-0.438889	0.382631	1	-0.0897319	0
OG0004278	AT5G40700.2	variable	1509	2895	1505	39	45	12	18	18	8	1.44444	-0.444444	0.585118	0	-0.0723982	0
OG0004279	AT4G13440.1	variable	771	1110	770	11	45	10	8	19	6	0.347368	0.652632	0.125543	1	0.23619	0
OG0004280	AT4G23040.1	Ara1	2624	2870	2620	48	72	20	42	33	15	1.09091	-0.0909091	0.84018	1	-0.0183824	0
OG0004282	AT1G49590.1	Ara1	1210	1225	1210	18	11	7	12	10	22	5.65714	-4.65714	0.00330183	1	-0.4075	0
OG0004284	AT5G57610.1	Ara1	5270	5320	5265	45	64	13	57	28	40	4.94505	-3.94505	5.62426e-05	1	-0.364097	0
OG0004285	AT1G44160.1	variable	1783	1875	1780	57	44	21	34	24	11	1.24405	-0.244048	0.655607	0	-0.0450549	1
OG0004286	AT3G59950.1	Ara1	2385	2385	2370	27	36	17	26	42	20	0.756303	0.243697	0.539275	1	0.063783	0
OG0004287	AT2G03470.1	Ara1	2250	2380	2245	85	74	21	23	47	21	1.80851	-0.808511	0.105257	1	-0.11071	0
OG0004288	AT1G66330.2	Ara1	2085	2090	2085	43	21	48	36	18	22	1.09491	-0.0949074	0.850945	1	-0.0225275	0
OG0004289	AT5G08139.1	Ara1	1879	1935	1840	25	46	8	29	54	24	1.38889	-0.388889	0.647192	1	-0.0652681	0
OG0004290	AT2G25730.1	Ara1	12318	12555	12265	149	153	97	191	180	105	0.896048	0.103952	0.590819	1	0.0258879	1
OG0004291	AT3G46980.1	Ara1	2665	2675	2660	72	40	68	33	19	20	1.11455	-0.114551	0.856753	1	-0.0271062	0
OG0004292	AT1G25460.1	variable	1589	1725	1595	47	33	8	23	24	20	4.89583	-3.89583	0.00139768	1	-0.309091	0
OG0004293	AT4G16380.2	Ara1	1270	1290	1265	18	53	24	34	12	9	0.5625	0.4375	0.301133	1	0.142857	0
OG0004294	AT3G01050.1	Ara1	585	585	585	11	4	3	16	4	2	1.83333	-0.833333	0.612616	1	-0.119048	0
OG0004295	AT1G29200.2	Ara1	2475	3245	2475	53	39	24	38	31	35	2.49328	-1.49328	0.0105718	1	-0.218615	0
OG0004296	AT5G42220.1	Ara1	4395	4475	4395	123	107	30	59	65	37	2.33385	-1.33385	0.00369609	1	-0.166667	0
OG0004297	AT1G63460.1	variable	835	2000	835	22	9	15	9	3	5	2.44444	-1.44444	0.434676	0	-0.219595	0
OG0004299	AT2G17780.1	Ara1	2031	2380	1730	805	42	20	2	20	1	2.0125	-1.0125	0.413908	1	-0.0233766	0
OG0004300	AT4G24290.2	Ara1	1750	3040	1740	18	14	16	24	48	17	0.398438	0.601562	0.0448601	1	0.20905	0
OG0004301	AT4G15530.1	Ara1	4779	4785	4775	65	52	94	96	20	60	2.07447	-1.07447	0.0215978	1	-0.158805	1
OG0004302	AT1G26810.1	variable	3214	3215	3210	46	28	24	46	14	46	6.29762	-5.29762	1.48556e-06	1	-0.42381	0
OG0004303	AT5G18670.1	variable	2680	2685	2665	47	54	16	51	34	50	4.31985	-3.31985	5.03013e-05	0	-0.34127	0
OG0004304	AT5G46560.1	Ara1	1933	1985	1920	40	103	15	22	49	20	1.08844	-0.0884354	1	0	-0.0171278	0
OG0004305	AT3G54420.1	Ara1	1364	1365	1365	15	21	6	40	7	16	5.71429	-4.71429	0.0148006	0	-0.409938	0
OG0004306	AT1G51360.1	variable	1050	1340	1050	34	40	12	27	17	5	0.833333	0.166667	1	0	0.0335968	0
OG0004307	AT1G44318.1	variable	2030	2035	2030	59	62	21	40	29	16	1.55008	-0.550082	0.310593	0	-0.0930556	0
OG0004308	AT2G44770.1	variable	1330	1330	1330	9	7	12	22	6	15	1.875	-0.875	0.520397	1	-0.142857	0
OG0004309	AT5G35170.1	variable	2940	3090	2935	42	33	26	61	18	28	2.51282	-1.51282	0.022144	0	-0.226343	0
OG0004310	AT3G47840.1	variable	3530	3535	3530	74	80	22	49	59	42	2.39445	-1.39445	0.0061579	0	-0.186675	0
OG0004311	AT2G35120.1	Ara1	780	780	780	7	9	6	11	6	12	2.33333	-1.33333	0.293636	1	-0.205128	1
OG0004312	AT1G22410.1	Ara1	2635	2635	2635	23	20	33	35	8	23	2.00379	-1.00379	0.170215	0	-0.15265	1
OG0004313	AT2G03380.1	variable	3445	3505	3445	93	66	46	50	35	37	2.13727	-1.13727	0.0117018	0	-0.182954	0
OG0004314	AT5G10110.1	variable	1605	1660	1585	32	50	6	21	62	20	1.72043	-0.72043	0.346839	1	-0.0860077	0
OG0004315	AT1G30000.1	Ara1	3120	3310	3115	44	16	11	41	31	52	6.70968	-5.70968	7.67572e-07	0	-0.426506	0
OG0004316	AT3G46870.1	Ara1	1285	1285	1285	27	14	30	41	5	11	1.98	-0.98	0.392965	1	-0.161184	0
OG0004317	AT5G44310.2	Ara1	1474	1725	1440	43	38	14	25	35	27	2.36939	-1.36939	0.0347757	0	-0.18987	0
OG0004319	AT3G08030.2	variable	1825	1825	1825	20	17	14	30	16	26	2.32143	-1.32143	0.105642	0	-0.207283	0
OG0004320	AT3G50240.1	Ara1	5254	5275	5240	142	89	71	70	37	18	0.972973	0.027027	1	1	0.00606061	0
OG0004322	AT1G43245.1	Ara1	2787	2890	2775	125	130	32	40	67	20	1.16604	-0.166045	0.628607	1	-0.0260634	0
OG0004323	AT5G23980.1	variable	3494	3585	3495	62	41	53	69	41	40	1.14128	-0.141279	0.665601	1	-0.0329576	0
OG0004324	AT5G16030.1	Ara1	1695	1710	1660	28	40	15	28	20	14	1.30667	-0.306667	0.639353	1	-0.0629275	0
OG0004326	AT1G61850.1	Ara1	6115	6770	6115	90	47	112	73	51	47	0.740546	0.259454	0.267025	1	0.0748636	0
OG0004327	AT3G47070.1	Ara1	500	535	500	10	43	4	27	6	3	1.25	-0.25	1	1	-0.047619	0
OG0004328	AT1G13940.1	Ara1	5025	5075	5000	73	94	33	54	101	44	0.963696	0.0363036	0.890857	1	0.00787248	0
OG0004329	AT5G18230.1	Ara1	4215	4400	4215	36	45	45	52	29	39	1.07586	-0.0758621	0.869202	1	-0.0179739	0
OG0004330	AT4G24480.1	Ara1	4779	4970	4735	58	94	43	71	70	65	1.25249	-0.252492	0.429606	1	-0.0557389	0
OG0004331	AT1G01450.1	Ara1	2349	3520	2290	45	34	15	38	33	25	2.27273	-1.27273	0.0515687	1	-0.181034	0
OG0004332	AT3G04030.1	Ara1	1940	2030	1935	25	30	18	28	15	12	1.11111	-0.111111	1	1	-0.0258398	0
OG0004333	AT5G11510.1	Ara1	4805	4835	4780	54	93	26	50	78	56	1.49112	-0.491124	0.193162	1	-0.0929104	0
OG0004334	AT4G23660.1	Ara1	2035	2035	2035	27	20	13	20	21	22	2.17582	-1.17582	0.119586	1	-0.186628	0
OG0004335	AT4G14820.1	Ara1	3607	3635	3600	124	113	36	65	45	29	2.21975	-1.21975	0.0116652	1	-0.166892	0
OG0004336	AT4G35270.1	Ara1	4814	4890	4815	43	44	30	80	43	47	1.56667	-0.566667	0.206815	1	-0.111263	0
OG0004337	AT3G22170.1	variable	4195	4240	4195	45	47	26	64	25	35	2.42308	-1.42308	0.0146973	1	-0.217136	0
OG0004338	AT3G62110.1	variable	2355	3115	2355	16	18	15	32	13	28	2.29744	-1.29744	0.0975192	1	-0.199056	0
OG0004339	AT3G51970.1	Ara1	1725	1730	1720	15	42	4	9	40	22	2.0625	-1.0625	0.276243	0	-0.144312	0
OG0004341	AT2G22260.1	Ara1	1570	1645	1570	29	41	20	31	36	15	0.604167	0.395833	0.295325	1	0.114046	0
OG0004342	AT4G33100.1	Ara1	459	460	450	8	5	3	6	1	3	8	-7	0.235165	1	-0.477273	0
OG0004343	AT3G55510.1	Ara1	2970	4250	2970	47	67	31	34	56	28	0.758065	0.241935	0.418125	0	0.0641026	0
OG0004344	AT3G09360.1	Ara1	3020	3055	3010	22	67	14	45	78	40	0.805861	0.194139	0.690261	1	0.0499058	0
OG0004345	AT3G08990.1	Ara1	640	770	635	9	5	5	10	8	7	1.575	-0.575	0.710382	1	-0.109524	0
OG0004346	AT4G10800.1	Ara1	1414	1425	1415	55	27	25	28	19	20	2.31579	-1.31579	0.0443882	1	-0.200321	0
OG0004347	AT5G27230.1	Ara1	4739	5060	4730	145	129	38	58	110	38	1.31818	-0.318182	0.29661	0	-0.0491065	0
OG0004348	AT4G27650.1	Ara1	1890	1890	1890	17	7	18	21	9	31	3.25309	-2.25309	0.0280354	1	-0.260714	0
OG0004349	AT2G32270.1	variable	1695	1700	1695	14	24	16	37	17	29	1.49265	-0.492647	0.476607	1	-0.0971014	0
OG0004350	AT5G49300.1	Ara1	695	735	670	21	21	6	13	8	7	3.0625	-2.0625	0.163458	0	-0.244444	0
OG0004351	AT2G46430.1	Ara1	3530	3580	3530	59	93	27	52	29	28	2.10983	-1.10983	0.036789	1	-0.177275	0
OG0004352	AT2G43018.1	Ara1	2450	2450	2450	21	13	35	53	9	26	1.73333	-0.733333	0.263203	1	-0.117857	0
OG0004353	AT4G22030.1	variable	2087	2090	2090	48	36	25	25	21	19	1.73714	-0.737143	0.226038	0	-0.132534	0
OG0004354	AT4G05060.1	variable	1435	1440	1425	33	15	30	22	11	10	1	0	1	0	0	0
OG0004356	AT1G13620.1	Ara1	545	550	545	10	9	4	6	12	4	0.833333	0.166667	1	1	0.0357143	0
OG0004357	AT4G36060.2	variable	1429	1450	1370	48	33	16	11	29	18	1.86207	-0.862069	0.149311	1	-0.132979	0
OG0004358	AT5G53080.1	variable	2819	2820	2815	59	60	19	43	34	31	2.83127	-1.83127	0.00475672	0	-0.233333	0
OG0004359	AT2G46505.1	Ara1	754	755	755	19	13	6	12	23	7	0.963768	0.0362319	1	0	0.00666667	0
OG0004360	AT4G29220.1	Ara1	2364	2690	2360	19	23	15	45	14	37	3.34762	-2.34762	0.0122944	1	-0.284314	0
OG0004362	AT1G43190.1	Ara1	2160	2170	2160	13	9	41	36	9	18	0.634146	0.365854	0.431709	1	0.0925926	0
OG0004363	AT5G06920.1	Ara1	1765	1780	1755	30	37	11	38	31	13	1.1437	-0.143695	0.813769	1	-0.0271619	0
OG0004364	AT3G10310.1	Ara1	4793	4895	4785	39	48	10	36	22	21	3.72273	-2.72273	0.00747056	1	-0.28429	0
OG0004365	AT5G23290.1	Ara1	755	755	755	13	4	3	12	2	12	26	-25	0.000678918	1	-0.669643	0
OG0004367	AT3G44350.1	Ara1	795	1415	800	303	15	10	1	7	0	0	1	1	0	0.0319489	0
OG0004368	AT5G08750.3	Ara1	1815	1815	1815	18	22	23	29	4	16	3.13043	-2.13043	0.091154	1	-0.239024	0
OG0004369	AT4G00230.1	Ara1	3745	4145	3745	68	91	62	72	33	45	1.4956	-0.495601	0.197361	1	-0.1	0
OG0004370	AT3G15790.1	Ara1	1270	1345	1270	26	37	6	14	47	13	1.19858	-0.198582	0.794092	1	-0.0291667	0
OG0004371	AT5G02470.2	Ara1	1460	1460	1450	16	12	21	34	7	10	1.08844	-0.0884354	1	1	-0.0206677	1
OG0004372	AT1G21730.1	Ara1	4450	4770	4450	70	49	39	54	24	45	3.36538	-2.36538	0.000195601	1	-0.294376	0
OG0004374	AT5G37670.1	Ara1	685	710	675	23	29	10	11	9	6	1.53333	-0.533333	0.527456	0	-0.0969697	0
OG0004375	AT5G59610.1	Ara1	1340	1410	1340	29	18	13	9	23	22	2.13378	-1.13378	0.125535	1	-0.179365	0
OG0004376	AT5G07280.1	Ara1	5960	6085	5960	55	80	36	116	105	121	1.76058	-0.760582	0.025974	1	-0.139794	0
OG0004379	AT5G39840.1	Ara1	3880	3980	3880	57	94	27	72	44	34	1.63131	-0.631313	0.146773	1	-0.114469	0
OG0004380	AT3G13350.1	variable	1594	1615	1590	11	39	13	24	12	10	0.705128	0.294872	0.768311	1	0.0871212	0
OG0004382	AT2G45720.1	Ara1	2765	3160	2765	39	28	32	46	14	28	2.4375	-1.4375	0.0324858	1	-0.215962	0
OG0004383	AT5G37370.1	Ara1	1965	2020	1965	23	17	21	29	12	18	1.64286	-0.642857	0.348341	1	-0.122727	0
OG0004384	AT5G25540.1	variable	875	940	865	12	20	5	8	53	16	0.724528	0.275472	0.753089	1	0.0622336	0
OG0004385	AT5G03490.1	variable	2325	2335	2315	55	184	13	81	20	13	2.75	-1.75	0.0505327	1	-0.202763	0
OG0004386	AT5G17820.1	Ara1	1565	1735	1565	7	31	18	41	13	31	0.92735	0.0726496	1	1	0.0154545	0
OG0004388	AT3G23280.1	Ara1	2310	2320	2310	31	36	22	42	27	20	1.04377	-0.043771	1	1	-0.0104376	0
OG0004389	AT5G35660.1	Ara1	1711	1920	1645	28	55	17	38	18	13	1.18954	-0.189542	0.812551	0	-0.0415771	0
OG0004390	AT5G57440.1	Ara1	1200	1555	1195	20	7	9	17	9	29	7.16049	-6.16049	0.000399519	1	-0.452813	0
OG0004391	AT1G02960.2	variable	2309	2420	2300	47	58	14	25	58	20	1.15764	-0.157635	0.842784	0	-0.0269021	0
OG0004392	AT2G35320.1	variable	1535	1675	1535	22	26	11	20	19	17	1.78947	-0.789474	0.327127	1	-0.138889	0
OG0004393	AT3G58530.1	Ara1	1765	1765	1765	30	35	9	19	17	21	4.11765	-3.11765	0.0050979	1	-0.321862	0
OG0004394	AT2G31240.1	variable	3084	3100	3075	51	46	22	61	23	50	5.03953	-4.03953	6.17232e-06	0	-0.383562	0
OG0004395	AT2G41880.1	Ara1	1934	1935	1935	27	32	9	30	22	22	3	-2	0.0371247	1	-0.25	0
OG0004396	AT3G60410.1	Ara1	1620	1670	1580	14	19	5	33	22	28	3.56364	-2.56364	0.0335642	1	-0.296842	0
OG0004397	AT3G48800.1	Ara1	1390	1435	1385	26	22	7	17	12	15	4.64286	-3.64286	0.007893	1	-0.343434	0
OG0004398	AT1G01880.1	Ara1	2995	3025	2955	44	53	20	36	61	44	1.58689	-0.586885	0.192536	0	-0.106548	0
OG0004399	AT1G23090.1	Ara1	3155	3155	3155	37	19	52	70	24	40	1.1859	-0.185897	0.620662	0	-0.0407303	0
OG0004401	AT3G13870.1	Ara1	4009	4015	4010	35	29	31	63	19	30	1.78268	-0.782683	0.136981	1	-0.142548	0
OG0004402	AT3G17205.1	Ara1	5144	5145	5145	43	63	43	61	29	46	1.58621	-0.586207	0.156915	1	-0.113333	0
OG0004403	AT3G22590.1	Ara1	2075	2075	2070	17	17	38	40	6	37	2.75877	-1.75877	0.0577882	0	-0.169556	0
OG0004407	AT5G02830.1	variable	4259	4360	4260	50	49	33	66	30	40	2.0202	-1.0202	0.0358865	0	-0.173838	0
OG0004408	AT3G56930.1	Ara1	2385	2400	2370	11	12	9	42	22	28	1.55556	-0.555556	0.438263	1	-0.11	0
OG0004409	AT2G24820.1	variable	2695	2730	2690	32	49	24	62	21	36	2.28571	-1.28571	0.0386127	0	-0.203008	0
OG0004410	AT1G51650.1	Ara1	350	350	350	1	8	5	6	3	5	0.333333	0.666667	0.58042	1	0.208333	0
OG0004411	AT4G14340.1	Ara1	2285	2300	2285	37	28	28	30	11	18	2.16234	-1.16234	0.118506	1	-0.18992	0
OG0004412	AT1G11760.1	variable	755	980	755	8	8	4	12	12	5	0.833333	0.166667	1	1	0.0392157	0
OG0004414	AT1G29850.1	Ara1	645	645	645	4	2	4	8	3	11	3.66667	-2.66667	0.342621	1	-0.285714	0
OG0004415	AT1G22310.2	Ara1	2125	2900	2085	56	190	15	31	58	5	0.321839	0.678161	0.0502394	1	0.131903	0
OG0004416	AT4G05440.1	variable	1664	1680	1655	47	23	14	29	20	10	1.67857	-0.678571	0.319093	0	-0.103825	0
OG0004417	AT4G20970.1	Ara1	950	955	950	30	16	3	8	15	14	9.33333	-8.33333	0.00124723	1	-0.39185	0
OG0004418	AT2G41060.1	Ara1	2255	2275	2250	37	48	13	36	30	34	3.22564	-2.22564	0.00415921	1	-0.27125	0
OG0004419	AT5G48120.1	Ara1	5670	5680	5665	122	161	34	76	82	54	2.36298	-1.36298	0.0013219	1	-0.17911	0
OG0004420	AT5G65620.1	variable	3955	4095	3930	45	29	21	61	21	58	5.91837	-4.91837	8.39402e-07	0	-0.415995	0
OG0004421	AT5G53120.1	Ara1	1795	1795	1795	30	8	19	19	7	18	4.06015	-3.06015	0.0131717	1	-0.332245	0
OG0004422	AT2G28320.1	Ara1	3685	3685	3655	33	23	43	41	12	54	3.45349	-2.45349	0.00193887	1	-0.252392	0
OG0004423	AT5G14440.1	Ara1	1460	1480	1460	27	18	13	10	25	12	0.996923	0.00307692	1	1	0.000675676	0
OG0004424	AT4G20040.1	variable	2415	2440	2415	66	35	61	48	13	31	2.58008	-1.58008	0.0136421	0	-0.22423	0
OG0004425	AT3G59290.1	Ara1	5120	5690	5120	87	174	16	73	76	41	2.93339	-1.93339	0.00114093	1	-0.195088	0
OG0004426	AT4G31670.1	Ara1	3154	3170	3155	66	100	24	57	30	16	1.46667	-0.466667	0.32881	1	-0.0811594	0
OG0004427	AT1G29140.1	variable	854	855	855	10	6	8	14	6	13	2.70833	-1.70833	0.191355	0	-0.239766	0
OG0004429	AT4G02990.1	Ara1	2704	2710	2705	47	22	37	41	16	21	1.66723	-0.66723	0.237823	1	-0.127091	0
OG0004431	AT2G45340.1	variable	3456	3700	3455	49	32	44	56	16	39	2.71449	-1.71449	0.00616114	0	-0.235973	0
OG0004432	AT3G44590.1	Ara1	545	695	405	220	4	4	0	2	0	0	1	1	1	0.0178571	0
OG0004433	AT4G38950.2	Ara1	4180	4445	4180	37	65	27	46	33	41	1.70258	-0.702581	0.128849	1	-0.132179	0
OG0004434	AT4G13700.1	variable	2288	2830	2290	100	116	27	29	23	11	1.77134	-0.771337	0.180331	0	-0.110931	0
OG0004435	AT2G31830.1	Ara1	5720	5890	5720	68	71	31	93	42	55	2.8725	-1.8725	0.000517389	1	-0.253879	0
OG0004436	AT4G26160.1	Ara1	1105	1120	1105	20	32	12	15	15	14	1.55556	-0.555556	0.444899	0	-0.107759	0
OG0004437	AT5G23420.1	variable	1205	1215	1170	22	17	16	11	30	21	0.9625	0.0375	1	1	0.00928793	0
OG0004438	AT5G57320.1	Ara1	4810	4950	4810	74	66	23	63	65	64	3.16789	-2.16789	9.92108e-05	1	-0.259011	0
OG0004439	AT5G09410.2	Ara1	4945	5150	4935	54	71	32	63	53	37	1.17807	-0.178066	0.644588	1	-0.0390181	0
OG0004441	AT3G16380.1	variable	2684	3005	2670	67	82	24	15	80	31	1.08177	-0.0817708	0.874274	1	-0.015543	0
OG0004443	AT3G10000.1	Ara1	2404	2440	2365	75	65	15	26	56	22	1.96429	-0.964286	0.0928649	0	-0.115385	0
OG0004444	AT3G04620.1	Ara1	821	825	800	17	10	2	23	6	8	11.3333	-10.3333	0.00696762	0	-0.466165	0
OG0004445	AT1G53645.1	Ara1	2615	2660	2590	50	58	18	39	41	27	1.82927	-0.829268	0.14446	0	-0.132353	0
OG0004446	AT5G19840.1	Ara1	2665	2680	2665	43	78	14	32	50	32	1.96571	-0.965714	0.0989711	1	-0.14463	0
OG0004447	AT1G21610.1	Ara1	3418	3465	3405	51	57	13	43	66	47	2.79371	-1.79371	0.00482836	1	-0.212804	0
OG0004448	AT5G65660.1	Ara1	680	695	680	7	7	4	12	3	16	9.33333	-8.33333	0.0146919	0	-0.478469	0
OG0004450	AT1G71260.1	Ara1	1189	1215	1180	15	34	15	13	15	13	0.866667	0.133333	0.799282	1	0.0357143	0
OG0004451	AT4G20300.1	Ara1	1696	1805	1670	30	31	10	25	20	21	3.15	-2.15	0.0220376	1	-0.262195	0
OG0004452	AT2G44710.1	Ara1	4044	4090	3950	70	62	17	40	52	39	3.08824	-2.08824	0.00115019	1	-0.233169	0
OG0004453	AT4G31630.1	Ara1	2556	2760	2555	51	125	22	34	75	28	0.865455	0.134545	0.735239	0	0.0295252	0
OG0004454	AT2G30580.1	Ara1	2100	2115	2100	30	46	18	32	18	23	2.12963	-1.12963	0.0916883	1	-0.185976	0
OG0004455	AT4G32780.1	variable	2035	2150	2030	18	22	14	28	22	35	2.04545	-1.04545	0.124743	0	-0.176535	0
OG0004456	AT5G06590.1	Ara1	1570	1645	1570	31	35	13	22	37	13	0.837838	0.162162	0.818062	0	0.0354545	0
OG0004457	AT2G20495.1	Ara1	1409	1600	1410	28	24	12	24	16	12	1.75	-0.75	0.31093	1	-0.128571	0
OG0004458	AT4G32250.2	Ara1	3055	3070	3055	40	39	12	33	42	33	2.61905	-1.61905	0.0230464	1	-0.209231	0
OG0004459	AT5G50330.1	variable	2393	2415	2395	36	25	14	28	12	18	3.85714	-2.85714	0.00890205	1	-0.32	0
OG0004460	AT4G22940.1	variable	2290	2830	2285	48	48	27	39	39	25	1.1396	-0.139601	0.728293	0	-0.030625	0
OG0004461	AT1G75950.1	variable	800	800	800	1	10	10	14	6	17	0.283333	0.716667	0.384385	1	0.16996	0
OG0004462	AT5G35180.1	Ara1	3888	3920	3835	63	46	48	55	35	29	1.0875	-0.0875	0.874592	1	-0.0206926	0
OG0004464	AT1G22110.1	Ara1	1410	1520	1410	25	23	12	25	26	9	0.721154	0.278846	0.608782	1	0.0671815	0
OG0004466	AT3G51620.2	Ara1	3775	4185	3750	59	115	20	38	68	40	1.73529	-0.735294	0.112833	1	-0.117206	0
OG0004467	AT5G45610.1	Ara1	3229	3250	3130	91	96	30	39	83	20	0.730924	0.269076	0.421077	1	0.0537591	0
OG0004468	AT5G58350.1	Ara1	2855	5215	2855	18	31	9	55	19	30	3.15789	-2.15789	0.0304406	1	-0.278912	0
OG0004469	AT5G03740.1	Ara1	1470	1735	1470	25	43	9	8	53	14	0.733753	0.266247	0.617247	1	0.0557507	0
OG0004471	AT3G24760.1	Ara1	1914	3455	1915	24	30	20	51	25	21	1.008	-0.008	1	1	-0.00197628	0
OG0004472	AT5G03415.1	Ara1	1925	1965	1925	20	47	29	39	19	9	0.326679	0.673321	0.0327472	1	0.270408	0
OG0004473	AT3G54510.2	Ara1	3085	3565	3085	29	42	11	62	19	42	5.82775	-4.82775	8.59159e-05	1	-0.413525	0
OG0004474	AT2G02730.1	Ara1	1380	1380	1380	24	25	21	14	5	9	2.05714	-1.05714	0.36036	1	-0.17619	0
OG0004475	AT3G23220.1	variable	696	710	695	16	26	7	14	18	13	1.65079	-0.650794	0.411525	0	-0.115007	0
OG0004476	AT5G15070.1	Ara1	5243	5380	5245	35	37	34	73	18	65	3.71732	-2.71732	0.000291825	1	-0.290379	0
OG0004479	AT1G52970.1	Ara1	743	865	735	23	41	5	15	16	5	1.4375	-0.4375	0.725622	0	-0.0595238	0
OG0004480	AT1G71460.1	Ara1	3444	3445	3440	72	46	59	66	17	29	2.08175	-1.08175	0.0406671	1	-0.180053	0
OG0004481	AT1G10240.1	variable	3400	3400	3395	19	10	25	44	21	48	1.73714	-0.737143	0.226038	1	-0.12747	0
OG0004482	AT1G54140.1	variable	915	920	905	13	6	19	17	4	14	2.39474	-1.39474	0.227185	0	-0.184028	0
OG0004483	AT1G50320.1	variable	910	910	910	21	14	9	24	3	9	7	-6	0.0143696	0	-0.45	0
OG0004485	AT1G68710.1	Ara1	6000	6010	5990	47	64	36	113	40	92	3.00278	-2.00278	0.00018986	1	-0.263235	0
OG0004486	AT5G26160.1	Ara1	4879	5265	4880	185	186	51	53	72	34	1.71296	-0.712963	0.0429856	1	-0.104653	0
OG0004487	AT2G30920.1	Ara1	1610	1610	1610	19	27	13	17	23	19	1.20736	-0.207358	0.81364	0	-0.046131	0
OG0004488	AT2G38700.1	variable	2060	2060	2060	26	10	21	28	5	17	4.20952	-3.20952	0.0185067	1	-0.325919	0
OG0004490	AT5G47670.2	Ara1	1170	1170	1155	14	14	9	15	5	10	3.11111	-2.11111	0.183672	1	-0.275362	0
OG0004491	AT2G31260.1	Ara1	4330	4345	4315	47	42	41	68	26	37	1.63133	-0.631332	0.186356	1	-0.121392	0
OG0004492	AT5G66810.1	Ara1	3748	3770	3470	49	74	15	61	23	24	3.4087	-2.4087	0.00452636	1	-0.276263	0
OG0004493	AT1G30240.1	Ara1	4125	4155	4110	84	94	35	45	74	41	1.32973	-0.32973	0.330716	1	-0.0624041	0
OG0004494	AT3G15950.1	Ara1	3860	3860	3835	56	61	31	49	71	29	0.737846	0.262154	0.350031	1	0.0663218	0
OG0004495	AT1G23870.1	Ara1	4335	4335	4335	42	25	33	80	19	60	4.01914	-3.01914	6.78801e-05	1	-0.319494	0
OG0004496	AT1G04140.2	Ara1	3950	4690	3950	31	29	12	44	41	52	3.27642	-2.27642	0.00300352	1	-0.28007	0
OG0004497	AT2G18700.1	Ara1	4307	4355	4310	55	39	42	73	25	35	1.83333	-0.833333	0.0731311	0	-0.150344	0
OG0004498	AT2G26330.1	Ara1	4880	4880	4880	52	45	59	104	22	60	2.4037	-1.4037	0.00682829	0	-0.200176	0
OG0004500	AT4G18360.1	Ara1	1840	1840	1840	28	8	23	51	2	18	10.9565	-9.95652	0.00049521	1	-0.44902	0
OG0004502	AT2G47900.1	Ara1	2030	2030	2030	17	17	22	32	5	20	3.09091	-2.09091	0.0636519	1	-0.235897	0
OG0004503	AT3G54200.1	Ara1	1175	1200	1170	19	53	10	33	20	14	1.33	-0.33	0.6134	0	-0.0669371	0
OG0004504	AT5G01800.1	Ara1	1085	1170	1070	24	42	2	18	27	17	7.55556	-6.55556	0.00529692	1	-0.309441	0
OG0004506	AT1G22270.1	variable	620	620	620	11	5	18	8	4	2	0.305556	0.694444	0.367022	0	0.287356	0
OG0004507	AT3G57810.2	Ara1	1083	1590	1025	39	23	11	9	37	13	1.2457	-0.2457	0.815259	1	-0.04	0
OG0004508	AT2G20585.1	variable	500	500	500	7	5	4	13	6	5	1.45833	-0.458333	1	1	-0.0909091	0
OG0004509	AT2G44830.1	Ara1	3825	3835	3825	32	23	30	72	19	51	2.86316	-1.86316	0.00448209	1	-0.2447	0
OG0004510	AT4G30870.1	Ara1	3294	3605	3295	53	77	12	45	33	17	2.27525	-1.27525	0.0824156	1	-0.155385	0
OG0004511	AT3G03000.1	Ara1	825	960	825	11	5	9	36	1	12	14.6667	-13.6667	0.00896366	1	-0.473077	0
OG0004512	AT4G29790.1	Ara1	6054	6055	6050	84	60	48	63	44	40	1.59091	-0.590909	0.118643	1	-0.112554	0
OG0004514	AT4G20080.1	Ara1	3869	3965	3870	122	58	80	65	43	32	1.13488	-0.134884	0.680471	0	-0.0306271	0
OG0004516	AT3G61590.1	Ara1	2055	2075	2055	11	16	10	43	21	33	1.72857	-0.728571	0.310758	1	-0.134921	0
OG0004517	AT2G23310.1	Ara1	1060	1225	1045	19	11	14	25	9	13	1.96032	-0.960317	0.277213	1	-0.166667	0
OG0004518	AT5G22120.1	Ara1	1914	1925	1895	32	33	14	32	32	18	1.28571	-0.285714	0.665976	1	-0.0556522	0
OG0004520	AT1G70060.1	Ara1	6629	6710	6620	124	104	47	99	102	65	1.68127	-0.681268	0.0283695	1	-0.114368	0
OG0004521	AT3G14780.1	Ara1	1735	1820	1705	35	79	3	27	52	16	3.58974	-2.58974	0.0633052	1	-0.156347	0
OG0004523	AT2G06000.1	Ara1	2680	2685	2680	69	57	39	51	29	26	1.58621	-0.586207	0.180011	1	-0.111616	0
OG0004524	AT1G14520.1	Ara1	1555	1555	1555	23	25	20	26	12	20	1.91667	-0.916667	0.24212	1	-0.159884	0
OG0004526	AT1G62340.1	Ara1	4158	4170	4140	140	106	73	104	44	36	1.56912	-0.569116	0.103979	0	-0.107277	0
OG0004527	AT5G50360.1	variable	1455	2130	1455	35	45	14	31	18	14	1.94444	-0.944444	0.23198	1	-0.151786	0
OG0004529	AT1G25420.1	Ara1	1615	1945	1605	38	27	5	31	17	19	8.49412	-7.49412	0.000153741	0	-0.411499	1
OG0004530	AT1G22280.1	Ara1	1405	1405	1405	5	7	14	29	5	21	1.5	-0.5	0.720276	1	-0.0708502	0
OG0004531	AT5G47180.2	Ara1	1100	1100	1100	21	8	10	18	5	10	4.2	-3.2	0.0551155	1	-0.344086	0
OG0004532	AT5G63540.1	Ara1	3219	3270	3155	78	95	22	45	40	24	2.12727	-1.12727	0.0343247	1	-0.155	0
OG0004534	AT4G10100.1	variable	480	660	480	8	12	7	14	1	3	3.42857	-2.42857	0.582043	1	-0.283333	0
OG0004535	AT5G60470.1	Ara1	2250	2360	2060	37	41	14	27	106	24	0.598383	0.401617	0.223445	0	0.0898944	0
OG0004536	AT5G47820.2	Ara1	5175	5180	5175	56	27	85	133	19	43	1.49102	-0.491022	0.269397	1	-0.0907115	0
OG0004538	AT5G05360.1	Ara1	815	855	805	9	18	4	8	5	4	1.8	-0.8	0.66192	1	-0.136752	0
OG0004540	AT3G25910.1	Ara1	1861	1870	1800	29	36	12	27	51	17	0.805556	0.194444	0.65896	1	0.0426829	0
OG0004541	AT4G27410.3	variable	820	1525	820	6	9	11	18	6	14	1.27273	-0.272727	1	0	-0.0529412	0
OG0004542	AT1G73440.1	Ara1	1270	1565	1255	18	63	6	16	59	15	0.762712	0.237288	0.775053	1	0.0472973	0
OG0004543	AT2G48020.1	Ara1	2315	2330	2315	16	14	13	40	10	31	3.81538	-2.81538	0.0122292	1	-0.307822	0
OG0004544	AT1G49330.1	variable	1655	1880	1645	36	111	7	25	134	23	0.882729	0.117271	0.810845	0	0.0162939	0
OG0004546	AT2G23760.1	Ara1	3135	3365	3135	46	65	27	68	15	23	2.61235	-1.61235	0.0265499	0	-0.2354	0
OG0004547	AT2G10940.2	variable	1455	1475	1425	42	44	39	33	15	10	0.717949	0.282051	0.501236	0	0.0814815	0
OG0004549	AT2G26300.1	variable	1915	1915	1915	13	11	16	41	1	15	12.1875	-11.1875	0.00821169	1	-0.385776	0
OG0004550	AT1G76470.1	Ara1	1625	2135	1625	26	26	9	24	25	18	2.08	-1.08	0.157619	1	-0.161462	0
OG0004552	AT4G28550.1	Ara1	2120	2120	2115	17	15	11	34	26	36	2.13986	-1.13986	0.115071	1	-0.187788	0
OG0004555	AT3G47530.1	Ara1	2955	2955	2945	96	63	41	59	27	35	3.03523	-2.03523	0.00050164	1	-0.265246	0
OG0004556	AT5G58850.1	variable	2149	2175	2150	48	65	10	34	31	7	1.08387	-0.083871	1	1	-0.0117967	0
OG0004557	AT1G15280.2	Ara1	2920	3005	2885	37	73	14	35	98	34	0.91691	0.0830904	0.852235	1	0.016934	0
OG0004558	AT3G12280.1	Ara1	5065	5110	5060	44	39	35	76	33	35	1.33333	-0.333333	0.411431	1	-0.0716679	0
OG0004559	AT3G61415.1	Ara1	1755	1810	1755	12	11	12	21	13	10	0.769231	0.230769	0.772482	1	0.0652174	0
OG0004560	AT1G14660.1	variable	3780	4035	3780	108	164	43	48	43	23	1.34343	-0.343429	0.422698	0	-0.0637166	0
OG0004561	AT4G34580.1	Ara1	2770	2775	2770	10	19	19	41	21	42	1.05263	-0.0526316	1	1	-0.0114943	0
OG0004562	AT1G17750.1	Ara1	5438	5450	5430	94	126	51	73	82	54	1.21377	-0.213773	0.460586	0	-0.0453347	0
OG0004563	AT5G35200.1	Ara1	2720	2740	2710	50	30	31	42	15	26	2.7957	-1.7957	0.0122299	1	-0.25143	0
OG0004564	AT4G27290.1	Ara1	3915	3915	3905	29	50	22	41	76	62	1.07536	-0.0753589	0.870046	1	-0.0179028	0
OG0004566	AT4G02260.1	Ara1	4420	4460	4415	44	32	57	51	20	35	1.35088	-0.350877	0.400141	1	-0.0720072	0
OG0004567	AT1G64385.1	Ara1	1755	1780	1745	38	49	21	35	58	23	0.71757	0.28243	0.461122	1	0.0719816	0
OG0004568	AT1G53790.1	variable	2219	3325	1885	50	112	11	27	49	12	1.11317	-0.113173	1	1	-0.0163934	0
OG0004569	AT5G58480.1	variable	2380	2395	2380	37	34	17	30	48	40	1.81373	-0.813725	0.11449	1	-0.139731	0
OG0004570	AT3G10370.1	variable	3145	3145	3145	15	16	24	59	17	36	1.32353	-0.323529	0.658232	0	-0.0638607	0
OG0004571	AT5G37930.1	Ara1	1744	1765	1745	54	46	23	22	32	19	1.39402	-0.394022	0.44351	1	-0.0738477	0
OG0004572	AT1G16290.1	Ara1	2094	2150	2095	25	18	20	18	14	18	1.60714	-0.607143	0.359425	1	-0.118056	0
OG0004573	AT3G23870.1	Ara1	1675	1705	1675	15	12	11	22	9	34	5.15152	-4.15152	0.00361771	1	-0.367621	0
OG0004574	AT1G02080.1	Ara1	12155	12205	11880	114	127	90	166	149	167	1.41969	-0.419687	0.05927	1	-0.0873045	0
OG0004576	AT3G11964.1	Ara1	9481	9670	9460	125	125	58	107	100	76	1.63793	-0.637931	0.0290165	1	-0.114878	0
OG0004578	AT1G73430.1	Ara1	3920	3925	3920	47	37	29	81	16	32	3.24138	-2.24138	0.00301152	1	-0.285088	0
OG0004579	AT3G22180.1	Ara1	3530	3530	3530	72	49	28	41	48	30	1.60714	-0.607143	0.150125	0	-0.104615	0
OG0004580	AT5G14420.2	Ara1	2340	2355	2315	17	19	9	38	14	20	2.69841	-1.69841	0.0742251	1	-0.242081	0
OG0004581	AT3G11440.1	Ara1	2765	2815	2740	64	43	16	32	40	21	2.1	-1.1	0.0812599	1	-0.144262	0
OG0004582	AT1G29990.1	Ara1	645	650	645	5	2	8	7	2	9	2.8125	-1.8125	0.386442	0	-0.202797	0
OG0004584	AT3G44340.1	Ara1	5480	5615	5480	156	80	85	82	46	19	0.758056	0.241944	0.380726	1	0.0603894	0
OG0004585	AT2G45900.1	variable	3600	3805	3560	63	146	16	53	63	21	1.3125	-0.3125	0.575188	1	-0.0474684	0
OG0004586	AT3G01150.1	Ara1	1995	2900	1990	17	43	18	34	19	36	1.78947	-0.789474	0.195337	1	-0.14026	0
OG0004587	AT3G09710.1	Ara1	2270	2455	2260	43	54	13	29	55	31	1.86434	-0.864336	0.137616	1	-0.128322	0
OG0004588	AT4G31170.1	Ara1	2060	2060	2060	7	4	6	29	20	39	2.275	-1.275	0.214217	1	-0.199478	0
OG0004589	AT1G07700.2	variable	1020	1035	1020	18	13	6	13	20	15	2.25	-1.25	0.179883	1	-0.178571	0
OG0004591	AT4G13520.1	variable	310	430	310	6	3	4	3	3	0	0	1	0.496503	0	0.4	0
OG0004592	AT1G18270.2	Ara1	6865	6885	6865	68	74	42	86	45	69	2.48254	-1.48254	0.000881646	1	-0.223445	0
OG0004593	AT5G09225.1	Ara1	340	360	340	5	19	5	5	0	1	Inf	#NAME?	1	1	-0.5	0
OG0004596	AT4G02860.1	Ara1	1565	1580	1515	32	38	14	20	9	12	3.04762	-2.04762	0.0579049	1	-0.267081	0
OG0004597	AT1G47480.1	Ara1	1570	1750	1570	53	58	29	44	29	7	0.441141	0.558859	0.127588	0	0.159214	0
OG0004598	AT2G27270.1	Ara1	1155	1180	1105	23	73	4	7	41	7	0.981707	0.0182927	1	0	0.00231481	0
OG0004599	AT1G68160.1	Ara1	1364	1415	1330	30	34	10	13	55	17	0.927273	0.0727273	1	1	0.0138889	0
OG0004600	AT4G15510.1	Ara1	1435	1500	1435	25	31	15	36	9	10	1.85185	-0.851852	0.398173	1	-0.151316	0
OG0004601	AT2G44150.1	Ara1	1814	1825	1795	23	18	13	32	18	23	2.26068	-1.26068	0.109588	1	-0.199864	0
OG0004602	AT5G02170.1	Ara1	2629	2635	2625	80	47	32	42	23	30	3.26087	-2.26087	0.000959372	1	-0.280323	0
OG0004603	AT1G24180.1	Ara1	1965	1965	1965	10	2	33	41	10	22	0.666667	0.333333	0.598249	0	0.0799419	0
OG0004604	AT1G48510.1	variable	1918	2055	1915	60	130	11	29	47	15	1.74081	-0.740812	0.273568	1	-0.0870059	0
OG0004605	AT1G14410.1	Ara1	1315	1345	1315	12	21	7	25	9	12	2.28571	-1.28571	0.224763	1	-0.203008	0
OG0004606	AT5G45140.1	Ara1	5805	5815	5805	38	53	64	93	52	39	0.445312	0.554688	0.00629247	1	0.19888	0
OG0004607	AT3G57280.1	variable	1130	1135	1130	18	21	10	6	13	12	1.66154	-0.661538	0.412673	1	-0.122857	0
OG0004609	AT5G52545.1	Ara1	395	800	395	4	12	0	10	6	2	Inf	#NAME?	0.515152	1	-0.25	0
OG0004610	AT5G23430.1	Ara1	4185	4185	4185	57	40	36	51	19	54	4.5	-3.5	9.01043e-06	1	-0.352629	0
OG0004613	AT1G13790.1	variable	3679	3690	3680	69	119	26	42	68	32	1.24887	-0.248869	0.532213	1	-0.0463158	0
OG0004615	AT2G21630.1	variable	3803	3805	3805	82	56	48	60	25	47	3.21167	-2.21167	0.000127783	0	-0.283547	0
OG0004616	AT1G29980.1	Ara1	2035	2070	2035	26	24	22	58	25	40	1.89091	-0.890909	0.126401	1	-0.157051	0
OG0004617	AT2G02080.1	Ara1	2580	2870	2575	45	42	30	38	18	22	1.83333	-0.833333	0.168401	1	-0.15	0
OG0004618	AT1G04260.1	Ara1	910	1460	910	15	10	2	20	8	21	19.6875	-18.6875	0.000148356	0	-0.606491	0
OG0004619	AT5G57360.1	Ara1	3044	3045	3045	25	10	30	42	11	56	4.24242	-3.24242	0.000636734	0	-0.290366	0
OG0004620	AT3G61230.1	Ara1	1065	1085	1060	11	9	8	18	11	7	0.875	0.125	1	1	0.0321637	0
OG0004621	AT1G14630.1	Ara1	1129	1130	1130	16	27	10	28	5	10	3.2	-2.2	0.110898	1	-0.282051	0
OG0004622	AT5G52290.1	variable	7970	8035	7970	123	208	35	102	94	52	1.94407	-0.944073	0.0110813	1	-0.134645	0
OG0004623	AT1G23230.1	Ara1	8075	8295	8070	64	66	58	104	55	80	1.60502	-0.605016	0.0619874	1	-0.117183	0
OG0004624	AT5G59490.1	variable	1330	1370	1330	21	27	11	23	23	9	0.747036	0.252964	0.787875	1	0.0625	0
OG0004625	AT2G22300.2	Ara1	5160	5170	5150	56	53	27	51	33	45	2.82828	-1.82828	0.00155758	0	-0.251622	0
OG0004626	AT5G07400.1	Ara1	5419	5500	5395	106	100	26	43	115	70	2.48161	-1.48161	0.000517223	1	-0.181409	0
OG0004628	AT4G39830.1	Ara1	2908	2915	2910	58	65	24	60	37	30	1.95946	-0.959459	0.0602493	1	-0.155078	0
OG0004629	AT3G48190.1	Ara1	12988	15260	12830	249	178	101	137	209	157	1.85196	-0.851959	9.80857e-05	1	-0.14039	0
OG0004630	AT5G60060.1	variable	1870	1965	1870	40	64	13	29	35	13	1.14286	-0.142857	0.822224	0	-0.0255503	0
OG0004631	AT2G16365.2	Ara1	3885	3990	2270	78	63	30	28	52	25	1.25	-0.25	0.517112	1	-0.0468975	0
OG0004632	AT5G20260.1	Ara1	1670	2360	1670	27	28	17	21	17	15	1.40138	-0.401384	0.490881	1	-0.0823864	0
OG0004633	AT5G24310.1	Ara1	1605	1605	1605	31	23	22	22	3	20	9.39394	-8.39394	0.000322007	1	-0.454471	0
OG0004634	AT2G01320.2	Ara1	3624	4285	3615	96	54	50	45	23	21	1.75304	-0.753043	0.113064	1	-0.134807	0
OG0004635	AT2G41000.1	Ara1	920	920	920	22	22	13	26	8	7	1.48077	-0.480769	0.546672	1	-0.0952381	0
OG0004636	AT5G26667.2	Ara1	1040	1645	1040	5	6	16	19	4	14	1.09375	-0.09375	1	1	-0.015873	0
OG0004637	AT1G52310.1	Ara1	2760	2770	2760	60	38	51	63	13	30	2.71493	-1.71493	0.0113673	1	-0.238215	0
OG0004638	AT3G44620.1	Ara1	1195	1240	1195	70	26	25	25	2	1	1.4	-0.4	1	0	-0.0701754	1
OG0004639	AT1G11840.1	Ara1	1415	1605	1415	9	7	8	24	16	19	1.33594	-0.335938	0.769013	1	-0.0722689	0
OG0004640	AT1G60220.1	Ara1	2920	3085	2865	45	84	28	30	63	42	1.07143	-0.0714286	0.876696	1	-0.0164384	0
OG0004641	AT5G62200.1	Ara1	950	1915	940	11	12	14	11	15	15	0.785714	0.214286	0.787608	0	0.06	0
OG0004642	AT2G29420.1	variable	1135	1140	1135	25	29	8	29	10	16	5	-4	0.00704583	0	-0.37296	0
OG0004643	AT4G03390.1	Ara1	3880	3950	3880	37	39	40	49	23	32	1.28696	-0.286957	0.595041	1	-0.0623377	0
OG0004644	AT5G17230.1	Ara1	2110	2125	2110	13	9	24	36	11	41	2.01894	-1.01894	0.155295	1	-0.139813	0
OG0004645	AT4G21820.1	Ara1	6273	6550	6175	131	115	42	77	85	62	2.27507	-1.27507	0.000785671	1	-0.178994	0
OG0004646	AT3G18550.1	Ara1	2164	2185	2155	58	46	13	31	44	16	1.62238	-0.622378	0.293991	1	-0.0835681	0
OG0004647	AT3G09920.1	Ara1	4075	4080	4075	33	29	56	46	25	48	1.13143	-0.131429	0.743949	1	-0.0283208	0
OG0004648	AT1G18390.1	Ara1	3239	3565	3220	40	349	21	74	58	18	0.591133	0.408867	0.186034	1	0.10742	0
OG0004649	AT1G57600.1	Ara1	2665	2675	2665	62	38	39	35	7	10	2.27106	-1.27106	0.18226	1	-0.202097	0
OG0004650	AT5G48270.1	Ara1	1610	1610	1610	41	26	16	38	11	19	4.42614	-3.42614	0.00250301	0	-0.352632	0
OG0004651	AT5G64930.1	Ara1	2820	3180	2805	33	128	10	31	108	22	0.672222	0.327778	0.369693	0	0.0633274	0
OG0004652	AT3G50590.1	Ara1	8069	8190	7920	104	30	94	97	25	86	3.80596	-2.80596	2.06972e-07	1	-0.300027	0
OG0004653	AT3G27325.1	Ara1	5425	5490	5425	88	67	44	70	42	44	2.09524	-1.09524	0.0109783	1	-0.178295	0
OG0004654	AT1G01290.1	Ara1	1349	1385	1315	27	25	6	18	25	16	2.88	-1.88	0.0733653	1	-0.208426	0
OG0004655	AT3G29290.1	Ara1	2700	2890	2700	78	52	32	33	29	30	2.52155	-1.52155	0.00721052	1	-0.217565	0
OG0004656	AT5G42670.1	Ara1	1498	1635	1380	48	62	19	25	38	4	0.265928	0.734072	0.0284998	1	0.188344	0
OG0004657	AT5G17070.1	Ara1	1385	1495	1305	28	32	10	20	28	10	1	0	1	1	0	0
OG0004658	AT1G72760.1	Ara1	3485	3580	3475	84	106	36	43	88	28	0.742424	0.257576	0.379724	1	0.0586207	0
OG0004659	AT2G22840.1	Ara1	2650	2695	2635	35	45	34	40	17	29	1.75606	-0.756055	0.18176	0	-0.137681	0
OG0004660	AT5G18400.2	Ara1	1345	1360	1345	17	17	15	24	15	7	0.528889	0.471111	0.398408	1	0.150568	0
OG0004661	AT5G15390.1	Ara1	1750	1800	1740	33	40	21	34	15	13	1.3619	-0.361905	0.637143	1	-0.0753968	0
OG0004662	AT2G28920.1	Ara1	724	830	725	30	27	21	15	10	6	0.857143	0.142857	1	0	0.0367647	0
OG0004663	AT1G69840.1	Ara1	1430	1430	1430	11	8	35	28	2	8	1.25714	-0.257143	1	1	-0.0391304	0
OG0004664	AT1G45180.1	Ara1	3222	3415	3225	129	110	32	31	62	24	1.56048	-0.560484	0.155208	1	-0.080312	0
OG0004666	AT1G17060.1	variable	1565	2600	1565	24	18	15	21	40	15	0.6	0.4	0.270163	0	0.111888	0
OG0004667	AT2G16900.1	Ara1	1910	1920	1910	44	44	26	27	24	18	1.26923	-0.269231	0.556291	1	-0.0571429	0
OG0004668	AT3G60260.1	Ara1	1317	2055	1330	538	13	11	1	12	0	0	1	1	1	0.0200364	0
OG0004669	AT1G13630.1	Ara1	4030	4495	4030	54	104	18	48	100	53	1.59	-0.59	0.167885	1	-0.0964052	0
OG0004670	AT3G24000.1	Ara1	3165	3245	3165	54	75	28	76	39	31	1.53297	-0.532967	0.243138	1	-0.101394	0
OG0004671	AT5G35930.1	Ara1	5197	5675	5190	194	102	72	60	34	24	1.90196	-0.901961	0.0387361	1	-0.143116	0
OG0004672	AT1G32340.1	Ara1	3440	3505	3425	66	84	39	52	45	25	0.940171	0.0598291	0.873986	0	0.0142857	0
OG0004673	AT4G23440.1	Ara1	4820	4855	4815	68	48	84	114	34	69	1.64286	-0.642857	0.0687728	1	-0.117271	0
OG0004674	AT3G03630.1	Ara1	2020	2045	2020	17	47	18	27	20	31	1.46389	-0.463889	0.506463	1	-0.0935574	0
OG0004675	AT2G44330.1	variable	898	945	900	29	92	3	18	30	4	1.28889	-0.288889	1	0	-0.0238971	0
OG0004676	AT1G59870.1	Ara1	7345	7345	7335	36	67	119	133	61	107	0.530652	0.469348	0.0109952	1	0.130837	0
OG0004677	AT5G60190.1	variable	1130	1130	1130	26	34	7	28	24	14	2.16667	-1.16667	0.195517	0	-0.1563	0
OG0004678	AT2G45380.2	Ara1	2469	2510	1375	31	36	8	20	15	9	2.325	-1.325	0.156924	1	-0.169872	0
OG0004679	AT3G24090.1	variable	3385	3400	3385	16	26	25	45	8	62	4.96	-3.96	0.00145796	1	-0.275958	0
OG0004680	AT3G02280.1	Ara1	3114	3310	3105	67	55	26	67	18	17	2.43376	-1.43376	0.0360527	0	-0.206144	0
OG0004681	AT1G01630.1	Ara1	1275	1275	1275	19	24	10	21	18	18	1.9	-0.9	0.313631	0	-0.155172	0
OG0004682	AT1G43800.1	variable	1954	1960	1955	50	52	37	71	11	15	1.84275	-0.842752	0.186923	1	-0.151636	0
OG0004684	AT3G04890.1	Ara1	1081	1095	1080	10	14	3	9	31	26	2.7957	-1.7957	0.2128	1	-0.225371	0
OG0004685	AT3G27080.1	Ara1	1010	1165	1010	12	36	12	13	18	14	0.777778	0.222222	0.787537	1	0.0625	0
OG0004686	AT1G15520.1	Ara1	7115	7280	7115	56	78	60	137	33	70	1.9798	-0.979798	0.0189775	0	-0.16237	0
OG0004687	AT5G66460.1	Ara1	2154	2165	2155	50	39	45	32	17	12	0.784314	0.215686	0.671805	0	0.0598911	0
OG0004688	AT5G62990.1	Ara1	2469	2925	2465	52	50	32	49	32	16	0.8125	0.1875	0.707196	1	0.047619	0
OG0004689	AT2G34090.2	Ara1	2225	2255	2195	21	24	15	35	20	36	2.52	-1.52	0.0524221	1	-0.22619	0
OG0004691	AT1G52510.1	Ara1	1899	1910	1900	29	28	11	32	8	41	13.5114	-12.5114	9.69373e-08	1	-0.561735	0
OG0004693	AT3G18900.1	Ara1	2318	2705	2320	65	52	23	40	64	18	0.794837	0.205163	0.592066	1	0.0418514	0
OG0004694	AT1G77300.1	Ara1	9023	9150	9005	166	269	37	117	214	72	1.50947	-0.509472	0.0778431	1	-0.0694822	0
OG0004695	AT2G32600.1	variable	1385	1405	1380	14	11	15	23	10	8	0.746667	0.253333	0.766128	0	0.0727969	0
OG0004696	AT2G32295.1	Ara1	2314	2315	2315	24	15	27	26	21	25	1.0582	-0.0582011	1	1	-0.0140665	0
OG0004697	AT3G29170.1	Ara1	605	605	605	16	6	8	10	7	7	2	-1	0.492423	1	-0.166667	0
OG0004698	AT2G19480.2	Ara1	1895	1900	1895	20	13	16	26	7	23	4.10714	-3.10714	0.0117798	1	-0.322222	0
OG0004699	AT5G20350.1	variable	3100	3100	3100	32	17	39	45	17	28	1.35143	-0.351433	0.563097	1	-0.0729264	0
OG0004700	AT5G17780.1	Ara1	2084	3815	2070	52	68	16	30	47	22	1.52128	-0.521277	0.340762	1	-0.0835465	0
OG0004701	AT4G33000.2	Ara1	1280	1290	1280	11	30	4	20	17	19	3.07353	-2.07353	0.125278	1	-0.261111	0
OG0004702	AT2G01510.1	Ara1	2920	2920	2920	70	38	25	31	25	41	4.592	-3.592	8.61202e-06	1	-0.358054	0
OG0004703	AT5G59950.1	Ara1	1220	1275	1220	26	15	19	17	4	9	3.07895	-2.07895	0.11867	1	-0.270085	0
OG0004704	AT4G23130.2	variable	3294	3345	3295	93	160	47	63	31	13	0.829787	0.170213	0.713672	0	0.0402597	0
OG0004705	AT5G25930.1	variable	5025	5045	5025	89	134	89	91	73	55	0.753425	0.246575	0.246541	0	0.0703125	0
OG0004706	AT5G10630.1	Ara1	3335	3740	3330	58	40	27	46	23	28	2.61514	-1.61514	0.0112581	1	-0.231373	0
OG0004707	AT4G39190.1	Ara1	1385	1390	1325	33	38	8	20	35	12	1.41429	-0.414286	0.612666	0	-0.0601972	0
OG0004708	AT1G30020.1	Ara1	783	790	775	19	58	6	10	2	4	6.33333	-5.33333	0.0673683	0	-0.426667	0
OG0004709	AT3G04630.1	Ara1	1435	1450	1425	24	30	11	21	16	16	2.18182	-1.18182	0.14158	1	-0.185714	0
OG0004710	AT5G44800.1	Ara1	11112	11205	11070	269	137	132	111	117	75	1.30633	-0.306333	0.167207	1	-0.0614479	0
OG0004711	AT3G55370.2	Ara1	1615	1650	1610	44	32	15	22	24	15	1.83333	-0.833333	0.186351	1	-0.130378	0
OG0004712	AT2G23945.1	Ara1	2290	2295	2280	66	72	19	33	35	19	1.88571	-0.885714	0.119368	0	-0.128322	0
OG0004713	AT1G07280.1	Ara1	2760	2825	2725	36	59	28	69	23	41	2.29193	-1.29193	0.0329395	1	-0.203125	0
OG0004714	AT1G13190.1	Ara1	2865	2970	2865	25	24	14	34	21	28	2.38095	-1.38095	0.0558521	1	-0.212454	0
OG0004715	AT4G15550.1	Ara1	2369	2375	2370	84	75	22	52	26	31	4.55245	-3.55245	2.05591e-05	1	-0.336312	0
OG0004716	AT1G08710.1	Ara1	1370	1370	1365	37	36	13	17	19	12	1.79757	-0.797571	0.322396	1	-0.127097	0
OG0004717	AT2G46550.1	Ara1	1985	2060	1965	26	31	16	26	42	28	1.08333	-0.0833333	1	1	-0.0190476	0
OG0004718	AT4G11270.1	variable	7230	7345	7190	156	121	78	97	77	88	2.28571	-1.28571	8.50165e-05	1	-0.2	0
OG0004719	AT3G25410.1	Ara1	2155	2165	2135	38	30	27	38	9	30	4.69136	-3.69136	0.00052424	0	-0.353846	0
OG0004720	AT1G18620.2	Ara1	4888	4895	4870	107	102	27	45	82	49	2.36811	-1.36811	0.00268026	1	-0.172553	0
OG0004721	AT2G33540.1	Ara1	6205	6275	6195	53	135	31	84	102	60	1.00569	-0.0056926	1	1	-0.00132275	0
OG0004722	AT4G09970.1	Ara1	1250	1260	1235	48	41	11	12	29	20	3.0094	-2.0094	0.0180411	0	-0.221723	0
OG0004723	AT2G15860.1	Ara1	2560	2580	2560	45	39	19	48	20	27	3.19737	-2.19737	0.00602851	0	-0.277593	0
OG0004724	AT3G07100.1	Ara1	5190	5195	5190	53	43	40	62	31	48	2.05161	-1.05161	0.0224944	1	-0.177487	1
OG0004726	AT5G52840.1	Ara1	845	845	845	5	8	7	14	14	19	0.969388	0.0306122	1	1	0.00757576	0
OG0004727	AT5G12840.1	Ara1	1361	1370	1355	16	13	19	27	11	16	1.22488	-0.22488	0.798129	1	-0.0497354	0
OG0004729	AT1G23480.1	Ara1	2780	2780	2775	16	19	30	56	11	28	1.35758	-0.357576	0.641148	1	-0.0657748	0
OG0004730	AT3G25190.1	variable	1095	1095	1095	17	13	19	27	3	10	2.98246	-1.98246	0.191203	0	-0.241453	0
OG0004731	AT1G71040.1	Ara1	2905	2935	2905	48	51	49	76	37	59	1.56205	-0.562052	0.147692	0	-0.109429	0
OG0004732	AT1G76900.2	Ara1	2275	2345	2275	25	21	16	60	17	61	5.60662	-4.60662	3.92649e-05	1	-0.391807	0
OG0004733	AT5G26340.1	Ara1	2630	2630	2625	24	24	39	72	12	33	1.69231	-0.692308	0.300612	1	-0.114286	0
OG0004734	AT5G55160.1	variable	515	520	510	3	4	6	12	0	5	Inf	#NAME?	0.258242	0	-0.333333	0
OG0004735	AT5G25820.1	variable	3270	3325	3270	46	63	33	57	45	49	1.51785	-0.517845	0.221401	1	-0.103555	0
OG0004736	AT2G26340.1	Ara1	1265	1425	1240	21	12	20	22	28	13	0.4875	0.5125	0.176269	0	0.170732	0
OG0004738	AT4G31770.1	Ara1	2090	2095	2090	18	26	14	28	22	31	1.81169	-0.811688	0.262201	1	-0.147406	0
OG0004739	AT1G05230.1	variable	3605	3610	3590	28	14	22	54	16	35	2.78409	-1.78409	0.0162694	1	-0.246275	0
OG0004740	AT1G73170.1	Ara1	3328	3355	3305	66	54	39	60	18	29	2.7265	-1.7265	0.00776007	1	-0.245593	0
OG0004741	AT3G20790.1	Ara1	1775	1880	1770	24	19	10	29	5	19	9.12	-8.12	0.000410352	0	-0.497549	0
OG0004742	AT1G03040.1	Ara1	1510	1545	1510	8	18	12	20	10	19	1.26667	-0.266667	0.767879	1	-0.0551724	0
OG0004743	AT5G18590.2	Ara1	3540	3680	3535	38	25	21	45	37	57	2.78764	-1.78764	0.00291583	1	-0.250451	0
OG0004744	AT3G05327.1	Ara1	1059	1065	1060	25	25	15	14	5	7	2.33333	-1.33333	0.318109	1	-0.208333	0
OG0004745	AT3G16520.3	Ara1	2255	2325	2255	55	132	26	70	32	22	1.45433	-0.454327	0.359973	1	-0.0864198	0
OG0004746	AT3G43540.1	Ara1	1864	1880	1865	64	24	48	32	15	15	1.33333	-0.333333	0.538006	1	-0.0714286	0
OG0004747	AT3G01510.1	Ara1	2955	2960	2920	42	36	28	50	26	35	2.01923	-1.01923	0.0550964	1	-0.17377	0
OG0004748	AT1G74580.1	Ara1	3814	4175	3815	56	64	21	37	40	48	3.2	-2.2	0.000485924	1	-0.272727	0
OG0004749	AT2G26770.1	Ara1	2480	2930	2480	19	15	24	57	6	32	4.22222	-3.22222	0.00782438	1	-0.283966	0
OG0004750	AT1G47278.1	Ara1	400	400	400	7	8	7	5	3	0	0	1	0.227941	1	0.5	0
OG0004751	AT4G14746.1	Ara1	1060	1085	1060	25	20	13	18	15	11	1.41026	-0.410256	0.602221	1	-0.0809717	0
OG0004752	AT4G04920.1	Ara1	6390	6405	6290	69	49	56	88	38	56	1.81579	-0.815789	0.0403003	1	-0.147745	0
OG0004753	AT1G21350.1	Ara1	755	1265	755	14	5	3	9	5	6	5.6	-4.6	0.0946329	1	-0.368984	0
OG0004754	AT5G58750.1	Ara1	1930	1935	1900	25	30	25	25	31	35	1.12903	-0.129032	0.851497	0	-0.030303	0
OG0004755	AT1G33980.1	Ara1	2409	2435	2410	52	56	27	36	32	24	1.44444	-0.444444	0.368415	1	-0.0867993	0
OG0004756	AT2G26780.1	Ara1	9129	9205	9120	126	141	64	171	47	55	2.30386	-1.30386	0.00111602	1	-0.202374	0
OG0004758	AT1G47570.2	variable	2328	2330	2325	50	40	28	21	27	13	0.859788	0.140212	0.838683	1	0.0339744	0
OG0004759	AT5G03800.1	Ara1	4479	4630	4480	100	84	33	62	55	32	1.76309	-0.763085	0.0698333	0	-0.119696	0
OG0004761	AT4G39790.1	Ara1	3285	3410	3265	68	56	23	46	34	30	2.6087	-1.6087	0.0061925	0	-0.216003	0
OG0004763	AT1G79360.1	variable	2633	2650	2630	36	44	24	62	29	35	1.81034	-0.810345	0.109646	0	-0.146875	0
OG0004764	AT4G21430.1	Ara1	4635	4700	4625	14	116	6	57	70	52	1.73333	-0.733333	0.334511	1	-0.12623	0
OG0004765	AT5G18550.1	Ara1	2325	2390	2320	28	44	14	45	32	35	2.1875	-1.1875	0.0747323	1	-0.189055	0
OG0004766	AT2G21320.1	Ara1	861	865	860	3	12	6	17	4	10	1.25	-0.25	1	1	-0.047619	0
OG0004767	AT2G39470.2	variable	1190	1190	1185	19	24	16	29	8	8	1.1875	-0.1875	1	1	-0.0428571	0
OG0004768	AT1G20670.1	variable	3260	3365	3205	46	47	34	59	50	41	1.10941	-0.109412	0.759469	0	-0.0255495	0
OG0004769	AT5G12440.1	Ara1	3250	3280	3240	52	73	18	41	57	50	2.53411	-1.53411	0.00699435	1	-0.210147	0
OG0004770	AT2G26280.1	Ara1	2835	2870	2835	39	40	44	53	11	33	2.65909	-1.65909	0.0216281	1	-0.21988	0
OG0004771	AT1G10820.1	Ara1	1160	1295	1160	13	16	7	14	25	17	1.26286	-0.262857	0.78371	1	-0.0547619	0
OG0004772	AT4G13050.1	Ara1	1835	1865	1835	32	21	34	26	15	14	0.878431	0.121569	0.825975	1	0.0323929	0
OG0004773	AT5G47850.1	Ara1	3755	3775	3750	121	145	95	72	49	31	0.8058	0.1942	0.430837	0	0.0523148	0
OG0004774	AT5G37680.1	Ara1	920	920	920	9	2	9	9	2	13	6.5	-5.5	0.0341769	1	-0.366667	0
OG0004775	AT5G51545.1	Ara1	925	940	920	15	28	9	16	13	16	2.05128	-1.05128	0.271226	1	-0.176724	0
OG0004776	AT1G79780.1	Ara1	935	940	935	14	17	4	10	17	12	2.47059	-1.47059	0.218484	1	-0.191571	0
OG0004777	AT1G07180.1	Ara1	2550	2555	2540	20	16	16	42	17	43	3.16176	-2.16176	0.00994587	1	-0.272222	0
OG0004778	AT2G38140.1	Ara1	590	590	590	12	6	9	13	3	4	1.77778	-0.777778	0.67029	1	-0.142857	0
OG0004780	AT3G17310.1	Ara1	3550	3565	3515	73	65	23	43	77	39	1.60757	-0.607566	0.132261	1	-0.0966236	0
OG0004781	AT4G33870.1	Ara1	2020	2040	2015	37	58	15	26	62	29	1.15376	-0.153763	0.850809	0	-0.0302198	0
OG0004782	AT2G26350.1	Ara1	1905	1940	1905	21	29	18	31	8	18	2.625	-1.625	0.0797663	0	-0.230769	0
OG0004783	AT5G61550.1	variable	4225	4245	4225	19	43	24	92	76	76	0.791667	0.208333	0.604623	1	0.0581395	0
OG0004784	AT4G39990.1	Ara1	1120	1135	1120	14	4	6	19	6	19	7.38889	-6.38889	0.00286448	0	-0.46	0
OG0004785	AT2G21860.1	Ara1	2610	2630	2600	72	63	56	58	22	22	1.28571	-0.285714	0.487931	0	-0.0625	0
OG0004786	AT5G17020.1	Ara1	5375	5380	5375	24	29	39	101	23	38	1.01672	-0.0167224	1	1	-0.0039032	0
OG0004787	AT3G14930.1	Ara1	2090	2090	2090	21	14	12	31	17	34	3.5	-2.5	0.00778342	1	-0.30303	0
OG0004788	AT5G01930.1	Ara1	2240	2320	2240	35	21	18	33	13	28	4.18803	-3.18803	0.00165534	1	-0.343304	0
OG0004789	AT1G80400.1	Ara1	2035	2100	2025	28	53	9	37	22	27	3.81818	-2.81818	0.00468163	1	-0.307777	0
OG0004790	AT4G39380.1	Ara1	2589	2835	2560	52	155	19	35	67	19	0.776119	0.223881	0.575479	1	0.0466754	0
OG0004791	AT3G46770.1	variable	1379	1450	1335	48	32	5	5	45	11	2.34667	-1.34667	0.177772	0	-0.102089	0
OG0004792	AT1G34245.1	variable	600	625	600	12	17	5	10	4	4	2.4	-1.4	0.394217	1	-0.205882	0
OG0004793	AT3G06310.1	Ara1	540	540	540	5	4	7	11	3	5	1.19048	-0.190476	1	1	-0.0416667	0
OG0004795	AT2G20210.1	Ara1	3020	3025	3010	51	66	34	51	35	34	1.45714	-0.457143	0.258754	1	-0.0927536	0
OG0004796	AT4G24580.1	Ara1	4599	4675	4600	60	82	23	51	46	58	3.28922	-2.28922	0.000185881	1	-0.280584	0
OG0004797	AT1G08750.1	Ara1	1940	1940	1920	21	22	10	23	16	21	2.75625	-1.75625	0.0534401	1	-0.244987	0
OG0004798	AT4G08790.1	Ara1	1536	1550	1530	28	10	20	29	6	16	3.73333	-2.73333	0.0209835	1	-0.310606	0
OG0004799	AT5G23090.2	Ara1	795	800	795	8	3	2	11	4	11	11	-10	0.0154193	1	-0.533333	0
OG0004800	AT3G15220.1	Ara1	3450	3525	3450	66	47	22	41	38	29	2.28947	-1.28947	0.0244178	1	-0.182836	0
OG0004801	AT3G04850.1	Ara1	3194	3275	3175	59	106	16	31	83	29	1.2884	-0.288404	0.491807	1	-0.0455952	0
OG0004803	AT2G04620.1	Ara1	3990	4275	3980	110	64	67	58	15	29	3.17413	-2.17413	0.00111079	1	-0.28056	0
OG0004804	AT5G39250.1	Ara1	1260	1320	1255	24	21	15	30	16	31	3.1	-2.1	0.0166037	1	-0.274959	0
OG0004805	AT2G36350.1	Ara1	4745	4830	4745	67	99	32	53	69	49	1.48687	-0.486866	0.2047	1	-0.0920219	0
OG0004806	AT3G14740.1	Ara1	1705	1920	1680	21	56	10	36	32	26	1.70625	-0.70625	0.267998	1	-0.125695	0
OG0004807	AT2G22870.1	variable	1500	1505	1500	19	13	27	33	8	22	1.93519	-0.935185	0.226982	0	-0.146377	0
OG0004809	AT2G05590.2	Ara1	1315	1540	1315	28	40	16	18	16	19	2.07812	-1.07812	0.170963	1	-0.179221	0
OG0004810	AT3G20290.1	Ara1	2725	2725	2725	30	15	37	37	13	24	1.49688	-0.496881	0.407671	1	-0.0964098	1
OG0004811	AT1G62050.1	variable	3120	3155	3105	80	43	78	75	10	23	2.35897	-1.35897	0.0364873	0	-0.203299	0
OG0004812	AT3G62330.1	variable	2394	2400	2395	30	40	14	32	20	19	2.03571	-1.03571	0.177228	0	-0.168998	0
OG0004813	AT5G61250.2	variable	2695	2695	2695	27	46	14	44	38	34	1.72556	-0.725564	0.235214	1	-0.130759	0
OG0004814	AT5G19960.1	Ara1	1684	1760	1685	34	59	14	27	14	9	1.56122	-0.561224	0.427455	1	-0.0996377	0
OG0004815	AT5G67490.1	variable	540	550	540	17	9	3	6	5	7	7.93333	-6.93333	0.0183865	0	-0.433333	0
OG0004816	AT1G13570.1	Ara1	2080	2080	2080	23	30	11	35	21	26	2.58874	-1.58874	0.0458411	0	-0.229662	0
OG0004817	AT2G25000.1	Ara1	1354	1355	1355	31	48	12	23	23	14	1.57246	-0.572464	0.473101	1	-0.0993086	0
OG0004818	AT3G59360.2	Ara1	2025	2025	2025	12	5	29	37	9	20	0.91954	0.0804598	1	1	0.0176619	0
OG0004819	AT4G25210.1	Ara1	1840	1865	1805	12	69	5	37	55	25	1.09091	-0.0909091	1	1	-0.0183824	0
OG0004820	AT3G57120.1	variable	2280	2355	2260	41	42	20	66	17	37	4.46176	-3.46176	0.000173344	0	-0.357316	0
OG0004821	AT5G53340.1	Ara1	1689	1870	1690	33	10	18	28	8	10	2.29167	-1.29167	0.167065	1	-0.202614	0
OG0004822	AT3G09370.1	Ara1	2523	2870	2490	40	63	16	22	51	21	1.02941	-0.0294118	1	1	-0.00595238	0
OG0004823	AT3G54750.2	Ara1	2945	3050	2940	73	63	16	41	37	33	4.06926	-3.06926	0.00011818	1	-0.291653	0
OG0004824	AT5G57250.1	Ara1	4855	4855	4855	148	115	47	59	65	66	3.19738	-2.19738	1.67246e-06	1	-0.262791	0
OG0004825	AT4G38340.1	Ara1	3835	3970	3450	43	65	31	39	48	42	1.21371	-0.21371	0.635991	1	-0.0477477	0
OG0004826	AT2G48060.1	Ara1	12310	12425	12310	75	61	75	153	47	131	2.78723	-1.78723	1.24564e-05	1	-0.235955	0
OG0004827	AT1G03160.1	Ara1	4560	4655	4550	57	61	22	68	37	64	4.48157	-3.48157	2.62061e-06	1	-0.355182	0
OG0004828	AT1G01160.1	Ara1	975	1010	960	9	5	8	11	16	12	0.84375	0.15625	1	1	0.0420168	0
OG0004829	AT5G17340.1	Ara1	800	835	800	13	37	7	15	19	8	0.781955	0.218045	0.758306	1	0.0537037	0
OG0004830	AT5G42520.1	Ara1	1710	1720	1705	26	16	26	32	6	11	1.83333	-0.833333	0.402511	1	-0.147059	0
OG0004831	AT2G26990.1	Ara1	2195	2195	2195	10	17	21	30	14	29	0.986395	0.0136054	1	0	0.00300075	0
OG0004832	AT2G02410.1	variable	1540	1540	1540	8	19	15	20	8	14	0.933333	0.0666667	1	1	0.0158103	0
OG0004833	AT1G16980.1	Ara1	4109	4240	4100	71	91	17	43	90	45	2.08824	-1.08824	0.0228901	1	-0.140152	0
OG0004834	AT4G11720.1	variable	3523	3555	3510	123	59	62	57	36	43	2.36962	-1.36962	0.00239309	1	-0.209169	0
OG0004835	AT1G33470.1	Ara1	1225	1520	1215	16	6	12	16	7	15	2.85714	-1.85714	0.0928275	1	-0.253247	0
OG0004836	AT2G26540.1	Ara1	1605	1620	1580	21	48	11	37	27	15	1.06061	-0.0606061	1	1	-0.0133929	0
OG0004837	AT4G11970.2	Ara1	2219	2400	2115	42	50	22	22	37	13	0.670762	0.329238	0.41445	1	0.08375	0
OG0004838	AT5G23480.1	Ara1	2090	3460	2060	57	75	12	28	97	23	1.12629	-0.126289	0.847089	1	-0.0177536	0
OG0004839	AT5G04320.1	Ara1	2070	2575	2055	760	33	23	0	19	0	0	1	1	1	0.0293742	0
OG0004840	AT1G73400.1	Ara1	2839	2850	2835	51	57	34	37	30	41	2.05	-1.05	0.0363002	1	-0.177465	0
OG0004841	AT5G28770.2	Ara1	1535	1635	1535	32	33	27	27	8	9	1.33333	-0.333333	0.783528	1	-0.0717846	0
OG0004842	AT5G16840.2	Ara1	1296	1315	1285	25	15	13	11	10	20	3.84615	-2.84615	0.0139606	1	-0.324561	0
OG0004843	AT5G15700.1	Ara1	5055	5115	5050	42	45	31	59	39	43	1.4938	-0.493797	0.259997	1	-0.0997327	0
OG0004844	AT4G02350.1	Ara1	3935	4020	3935	30	17	69	57	16	38	1.03261	-0.0326087	1	1	-0.00673401	0
OG0004845	AT1G64980.1	Ara1	1295	1295	1295	17	6	29	28	10	11	0.644828	0.355172	0.433373	0	0.106625	0
OG0004846	AT1G19850.1	Ara1	4510	4515	4510	44	27	31	55	34	77	3.21442	-2.21442	0.000251124	1	-0.28036	0
OG0004847	AT5G48450.1	Ara1	3104	3135	2930	46	45	44	42	31	28	0.944282	0.0557185	0.868763	1	0.0143126	0
OG0004848	AT1G49190.1	Ara1	2034	3185	1975	76	142	15	30	74	13	0.89009	0.10991	0.838588	0	0.0154099	0
OG0004849	AT1G73850.1	Ara1	3175	3225	3165	55	56	19	52	27	38	4.07407	-3.07407	0.000127514	1	-0.327859	0
OG0004850	AT2G37420.1	Ara1	5194	5195	5195	74	113	40	100	37	50	2.5	-1.5	0.00172525	1	-0.223835	0
OG0004851	AT3G26100.2	Ara1	2160	2665	2160	18	17	16	35	29	45	1.74569	-0.74569	0.212852	1	-0.13752	0
OG0004852	AT3G03560.1	Ara1	2605	2610	2605	37	28	17	36	16	26	3.53676	-2.53676	0.00384447	1	-0.304233	0
OG0004853	AT3G60050.1	Ara1	2364	2375	2365	47	45	16	27	29	18	1.82328	-0.823276	0.210517	1	-0.12901	0
OG0004854	AT3G12680.1	Ara1	2620	2640	2595	33	20	22	31	26	27	1.55769	-0.557692	0.333887	1	-0.109434	0
OG0004855	AT3G03070.1	Ara1	550	570	550	4	4	9	8	4	11	1.22222	-0.222222	1	0	-0.0410256	0
OG0004856	AT5G15570.1	Ara1	1905	1905	1890	36	48	18	21	29	21	1.44828	-0.448276	0.419987	1	-0.0866667	0
OG0004857	AT4G31230.1	Ara1	3818	3885	3820	44	37	20	47	37	34	2.02162	-1.02162	0.0548594	1	-0.166373	0
OG0004858	AT1G63010.1	Ara1	3495	3495	3495	22	35	54	67	20	30	0.611111	0.388889	0.247103	1	0.110526	0
OG0004860	AT5G60760.1	Ara1	3690	3720	3670	37	49	33	72	27	47	1.95174	-0.95174	0.0647693	1	-0.163707	0
OG0004861	AT1G43670.1	Ara1	1705	1705	1705	13	7	15	37	3	24	6.93333	-5.93333	0.0066702	0	-0.353175	0
OG0004862	AT1G49520.1	Ara1	1859	1905	1860	59	32	20	27	17	16	2.77647	-1.77647	0.0256654	1	-0.231684	0
OG0004863	AT1G50620.1	Ara1	3145	3395	3130	70	78	23	35	75	32	1.29855	-0.298551	0.431922	1	-0.0517536	0
OG0004864	AT2G18400.1	Ara1	510	510	510	3	1	7	10	0	4	Inf	#NAME?	0.505495	1	-0.3	0
OG0004865	AT3G05710.2	variable	1650	1650	1650	18	13	7	26	9	30	8.57143	-7.57143	0.000208093	1	-0.489231	0
OG0004866	AT5G45390.1	variable	1460	1465	1460	21	3	35	32	1	13	7.8	-6.8	0.0498894	0	-0.303571	1
OG0004867	AT1G17680.1	Ara1	4480	4505	4455	34	59	27	53	43	39	1.14212	-0.142119	0.736439	1	-0.0329868	0
OG0004868	AT5G56620.1	Ara1	1929	2115	1905	24	36	13	17	46	25	1.00334	-0.00334448	1	1	-0.000761325	0
OG0004869	AT2G43465.1	Ara1	1939	1980	1940	46	63	7	31	46	11	1.57143	-0.571429	0.446632	1	-0.060907	0
OG0004870	AT2G38800.1	Ara1	3060	3180	3050	52	81	10	38	60	29	2.51333	-1.51333	0.0246545	1	-0.164552	0
OG0004871	AT2G43970.1	variable	2724	2755	2695	51	34	33	35	8	15	2.89773	-1.89773	0.0339672	0	-0.259317	0
OG0004872	AT5G13950.1	Ara1	4695	4740	4695	49	84	28	48	119	57	0.838235	0.161765	0.564624	1	0.0397727	0
OG0004873	AT5G07790.1	Ara1	3079	3205	3065	52	132	8	50	76	25	2.13816	-1.13816	0.106454	1	-0.114191	0
OG0004874	AT2G18510.1	variable	1815	1830	1815	14	15	11	39	12	17	1.80303	-0.80303	0.413045	0	-0.146207	0
OG0004875	AT1G73740.1	Ara1	2155	2195	2155	33	24	25	32	23	25	1.43478	-0.434783	0.435206	1	-0.0897989	0
OG0004876	AT1G72770.1	Ara1	2555	2620	2550	37	50	27	42	18	27	2.05556	-1.05556	0.0814057	1	-0.178125	0
OG0004877	AT5G19000.1	Ara1	2035	2255	2035	21	16	17	26	15	28	2.30588	-1.30588	0.076805	1	-0.203794	0
OG0004878	AT1G18340.1	Ara1	1505	1505	1505	6	24	8	15	10	25	1.875	-0.875	0.50104	1	-0.142857	0
OG0004879	AT5G52890.1	Ara1	1785	1945	1770	43	64	7	19	51	15	1.80672	-0.806723	0.339085	1	-0.0872727	0
OG0004880	AT1G31790.1	Ara1	2045	2060	2045	70	44	18	36	28	26	3.61111	-2.61111	0.000740384	0	-0.276936	0
OG0004882	AT2G31840.1	Ara1	1750	1770	1715	25	26	14	27	18	21	2.08333	-1.08333	0.171587	1	-0.179487	0
OG0004884	AT4G20010.2	Ara1	1855	1940	1835	50	32	16	28	27	21	2.43056	-1.43056	0.0421262	1	-0.195076	0
OG0004885	AT1G26170.1	Ara1	5110	5115	5110	59	57	29	55	44	32	1.47962	-0.479624	0.258451	1	-0.0915072	0
OG0004886	AT3G26440.1	Ara1	1980	1990	1980	29	25	30	34	21	26	1.19683	-0.196825	0.697973	1	-0.0447169	0
OG0004887	AT4G39710.1	Ara1	1085	1240	1085	17	24	11	18	4	10	3.86364	-2.86364	0.100122	1	-0.321429	1
OG0004888	AT3G02860.2	Ara1	1559	1615	1560	31	21	11	12	25	20	2.25455	-1.25455	0.116264	1	-0.18254	0
OG0004889	AT5G40210.1	Ara1	1693	1705	1680	48	36	20	33	17	23	3.24706	-2.24706	0.00478679	1	-0.280882	0
OG0004890	AT1G79690.1	Ara1	3860	3870	3860	38	47	29	45	33	69	2.73981	-1.73981	0.00238513	1	-0.243635	1
OG0004891	AT1G17640.1	Ara1	1845	1845	1845	26	28	8	14	23	26	3.67391	-2.67391	0.0119786	1	-0.295318	0
OG0004892	AT2G19260.1	Ara1	3155	3160	3155	110	85	27	21	48	18	1.52778	-0.527778	0.279006	1	-0.075647	0
OG0004893	AT3G22800.1	variable	2349	2385	2250	34	52	29	52	10	24	2.81379	-1.81379	0.031893	0	-0.245565	0
OG0004894	AT2G27900.2	variable	5620	5725	5620	61	60	39	84	56	63	1.75962	-0.759615	0.0424815	1	-0.139412	0
OG0004895	AT2G32340.1	variable	1774	1870	1775	35	91	9	27	58	23	1.54215	-0.542146	0.394551	1	-0.0794052	0
OG0004896	AT3G59410.1	Ara1	6204	6380	6200	57	71	46	89	44	58	1.6334	-0.633399	0.0941945	1	-0.122026	0
OG0004897	AT5G08180.1	Ara1	780	780	780	8	8	6	17	8	12	2	-1	0.486715	0	-0.171429	0
OG0004898	AT5G40660.1	Ara1	1625	1640	1625	34	22	17	32	6	17	5.66667	-4.66667	0.00213141	1	-0.405797	0
OG0004899	AT2G20300.1	variable	3720	3750	3715	36	49	25	67	10	32	4.608	-3.608	0.000555514	1	-0.352069	1
OG0004900	AT1G05690.1	Ara1	1820	2020	1820	34	31	9	24	48	25	1.96759	-0.967593	0.14462	1	-0.133163	0
OG0004901	AT5G35330.1	Ara1	1360	1530	1355	25	42	11	25	23	19	1.87747	-0.87747	0.244274	1	-0.146825	0
OG0004903	AT4G15980.1	Ara1	3500	3620	3490	161	136	52	54	50	28	1.73385	-0.733846	0.0556192	0	-0.114843	0
OG0004904	AT1G24706.1	variable	9020	9060	9000	80	76	72	109	54	90	1.85185	-0.851852	0.0102463	1	-0.151316	0
OG0004906	AT4G15480.1	Ara1	2450	2450	2450	68	51	60	34	30	40	1.51111	-0.511111	0.183136	1	-0.102679	0
OG0004907	AT5G42870.1	Ara1	4650	4695	4645	102	82	60	76	72	34	0.802778	0.197222	0.434198	1	0.0496157	0
OG0004908	AT5G52200.1	Ara1	955	1065	930	12	24	8	12	15	13	1.3	-0.3	0.771014	1	-0.0642857	0
OG0004909	AT1G67310.1	Ara1	5079	7755	5035	51	106	26	63	104	59	1.1128	-0.112796	0.773324	1	-0.0243009	0
OG0004910	AT4G29560.1	Ara1	2465	4280	2465	50	86	16	45	28	24	2.67857	-1.67857	0.0183634	1	-0.219114	0
OG0004911	AT5G55760.1	variable	2365	2445	2365	28	21	37	54	13	11	0.640333	0.359667	0.472847	0	0.110897	0
OG0004912	AT2G24180.1	variable	2515	2520	2515	54	63	44	49	31	25	0.989736	0.0102639	1	1	0.00255102	0
OG0004913	AT3G18520.1	Ara1	2760	2780	2760	51	35	16	45	29	25	2.74784	-1.74784	0.0121914	1	-0.224157	0
OG0004914	AT2G22320.1	Ara1	555	675	555	14	31	8	1	9	2	0.388889	0.611111	0.429976	0	0.181818	0
OG0004915	AT1G18370.1	Ara1	4870	4905	4870	36	18	59	61	19	52	1.66994	-0.669938	0.138299	1	-0.111342	0
OG0004916	AT5G48240.1	Ara1	1545	1570	1540	26	29	14	23	16	11	1.27679	-0.276786	0.79722	1	-0.0574074	0
OG0004917	AT5G13220.1	Ara1	985	1030	985	15	30	8	18	13	17	2.45192	-1.45192	0.166087	1	-0.218841	0
OG0004918	AT4G11040.1	Ara1	1474	1490	1470	45	38	24	32	20	26	2.4375	-1.4375	0.0341374	1	-0.217391	0
OG0004919	AT4G13550.1	Ara1	4110	4630	4110	144	80	68	46	44	32	1.54011	-0.540107	0.124069	1	-0.100298	0
OG0004920	AT4G40060.1	Ara1	1470	1525	1470	28	31	13	24	13	15	2.48521	-1.48521	0.084605	1	-0.218641	0
OG0004921	AT5G54290.1	Ara1	1770	1780	1770	31	19	37	28	5	7	1.17297	-0.172973	1	1	-0.0392157	0
OG0004922	AT3G28690.1	Ara1	1880	2385	1880	10	5	37	27	5	18	0.972973	0.027027	1	1	0.00462535	0
OG0004924	AT3G24140.1	Ara1	2070	2080	2070	21	11	19	37	12	25	2.30263	-1.30263	0.106837	1	-0.200676	0
OG0004925	AT1G28530.1	Ara1	3069	3075	3045	79	40	21	49	57	45	2.96992	-1.96992	0.000542196	1	-0.231176	0
OG0004926	AT1G71960.1	Ara1	3310	3310	3310	13	26	13	30	28	26	0.928571	0.0714286	1	1	0.0185185	0
OG0004927	AT4G28710.1	Ara1	7510	9520	7530	2995	127	57	5	32	0	0	1	1	1	0.0186763	0
OG0004928	AT3G47470.1	Ara1	1255	1265	1255	5	4	23	21	6	6	0.217391	0.782609	0.0563231	0	0.321429	0
OG0004929	AT1G08140.1	Ara1	4090	4100	4085	44	118	26	60	141	30	0.360065	0.639935	0.00221828	0	0.19599	0
OG0004930	AT2G19940.1	Ara1	1945	2020	1945	24	18	29	24	26	26	0.827586	0.172414	0.69764	1	0.0471698	0
OG0004931	AT3G03380.1	Ara1	5484	5490	5485	39	40	34	94	24	55	2.62868	-1.62868	0.00506894	1	-0.230449	0
OG0004932	AT5G23750.1	Ara1	1010	1260	1010	21	25	11	13	7	13	3.54545	-2.54545	0.0460426	0	-0.30625	0
OG0004933	AT3G58730.1	Ara1	1305	1305	1305	5	9	6	28	2	17	7.08333	-6.08333	0.0680312	1	-0.349282	1
OG0004934	AT5G17990.1	Ara1	2220	2220	2220	35	38	35	31	10	12	1.2	-0.2	0.80863	1	-0.0454545	0
OG0004935	AT3G55190.1	Ara1	1595	1720	1560	39	18	10	19	26	20	3	-2	0.0263765	0	-0.230701	0
OG0004936	AT2G41310.1	Ara1	1125	1130	1120	16	10	6	25	22	15	1.81818	-0.818182	0.40227	0	-0.132678	0
OG0004937	AT5G59440.1	Ara1	1315	1615	1315	14	17	12	30	20	31	1.80833	-0.808333	0.236758	1	-0.146305	0
OG0004938	AT5G08390.1	Ara1	4195	4195	4195	35	60	19	61	23	34	2.72311	-1.72311	0.0134196	1	-0.244639	0
OG0004939	AT1G48870.1	Ara1	2963	2985	2940	91	84	28	37	53	18	1.10377	-0.103774	0.861321	0	-0.018227	0
OG0004940	AT1G66810.1	Ara1	1550	1640	1525	32	45	15	40	33	8	0.517172	0.482828	0.228317	1	0.124027	0
OG0004941	AT2G43860.1	Ara1	2025	2035	2025	34	41	17	31	28	18	1.28571	-0.285714	0.672542	0	-0.057971	0
OG0004942	AT1G64700.1	Ara1	1015	1035	1010	31	15	16	12	11	9	1.58523	-0.585227	0.420525	0	-0.109574	0
OG0004943	AT2G36810.1	Ara1	8580	8580	8540	53	53	64	101	43	92	1.7718	-0.771802	0.037223	1	-0.134473	0
OG0004945	AT2G47490.1	Ara1	1559	1570	1560	12	6	12	31	6	25	4.16667	-3.16667	0.0220773	1	-0.306452	0
OG0004946	AT3G52640.1	Ara1	3380	3760	3380	54	39	28	46	23	25	2.09627	-1.09627	0.0639313	0	-0.17937	0
OG0004947	AT1G11100.1	Ara1	6127	6420	6105	110	171	31	67	121	52	1.52493	-0.524927	0.123035	1	-0.0807199	0
OG0004948	AT2G32010.1	Ara1	2969	3005	2970	26	23	24	48	19	43	2.45175	-1.45175	0.0325369	1	-0.213548	0
OG0004950	AT2G39170.1	Ara1	1155	1365	1155	21	22	11	13	12	6	0.954545	0.0454545	1	0	0.0104167	0
OG0004952	AT3G02060.1	Ara1	4115	4140	4115	31	11	31	51	15	33	2.2	-1.2	0.0539557	1	-0.1875	0
OG0004953	AT5G14080.1	Ara1	3169	3170	3165	49	44	17	34	63	64	2.9281	-1.9281	0.0011907	1	-0.246361	0
OG0004954	AT5G01830.1	Ara1	3370	3415	3360	40	141	18	151	30	41	3.03704	-2.03704	0.00273039	1	-0.26712	0
OG0004955	AT3G13800.1	Ara1	1805	1805	1795	29	24	17	20	10	9	1.53529	-0.535294	0.578708	1	-0.104119	0
OG0004957	AT4G27980.1	Ara1	2825	5465	2795	47	96	10	27	110	40	1.70909	-0.709091	0.205009	1	-0.0912281	0
[truncated: 12,713 more rows]

## Sheet: dN-dS analysis
OG	AT locus	background w	forground w	dN	dS	group	LENG At	LENG align	LENG trim align
OG0003882	AT4G32360.1	0.1694	0.06492	0.0034	0.0522	Ara1	483	510	364
OG0018812	AT2G34740.1	0.29894	999	0.0058	0	variable	339	383	265
OG0008277	AT3G11960.1	0.17329	0.23565	A:0.27473	G:0.17802	Ara1	1379	1410	1368
OG0018942	AT1G80133.1	0.44935	0.50273	0.0497	0.0988	variable	99	129	99
OG0008702	AT2G28790.1	0.10335	0.48133	0.176951	0.092285	all1	249	369	249
OG0008652	AT5G12900.1	0.12082	0.07888	(0.0136	0.1729)	all1	562	582	556
OG0011486	AT1G17140.1	0.14315	0.13079	0.112359	0.099617	variable	344	424	344
OG0005190	AT5G21326.1	0.15447	0.03607	0.0018	0.0504	Ara1	439	1313	439
OG0007284	AT2G01620.1	0.22201	0.05277	0.2532)	0.1797	Ara1	292	297	288
OG0013792	AT2G23340.1	0.12387	0.49339	0.0114	0.0231	all1	176	180	159
OG0011737	AT3G06300.1	0.06636	0.10011	(0.0146	0.1450)	all1	299	326	299
OG0015844	AT2G11890.1	0.12623	0.11229	0.0065	0.0577	all1	210	210	206
OG0013573	AT5G59770.1	0.3	0.36111	0.0146	0.0404	all1	221	272	221
OG0005221	AT1G05490.1	0.40218	0.44712	0.0275	0.0616	Ara1	1410	1668	1360
OG0007065	AT5G21010.1	0.15452	0.13994	0.0053	0.0381	Ara1	410	410	410
OG0005371	AT4G10110.1	0.13265	0.0001	0.112995	0.04179	variable	173	271	168
OG0007135	AT2G18460.2	0.07517	0.0001	0.119837	0.00672	Ara1	274	275	247
OG0011667	AT4G25040.1	0.4093	0.48005	(0.1153	0.2402)	all1	170	171	170
OG0015914	AT2G27140.1	0.4019	0.30247	G:0.19535	0.166605	all1	224	244	222
OG0013423	AT1G61780.1	0.01256	0.07834	0.0086	0.11	all1	98	98	98
OG0003198	AT5G60590.2	0.10282	0.04186	0.0028	0.0671	variable	164	338	164
OG0001827	AT2G36530.1	0.0486	0.0536	(0.0079	0.1472)	variable	444	444	444
OG0007510	AT5G62600.1	0.14653	0.16629	0.1216	(0.0180	Ara1	958	1000	938
OG0005754	AT3G26570.1	0.08607	0.07356	0.095852	2.0844	Ara1	613	616	583
OG0013006	AT2G04305.1	0.06183	0.07643	0.0028	0.0368	all1	434	511	453
OG0011242	AT1G52680.1	0.31488	0.24728	0.0174	0.0705	all1	114	133	111
OG0013156	AT3G13050.1	0.19677	0.17808	G:0.18600	0.128199	all1	500	503	500
OG0011312	AT1G68200.1	0.17882	0.16186	C:0.24342	A:0.27961	all1	308	336	306
OG0007440	AT5G04040.1	0.07526	0.08693	0.0043	0.0497	Ara1	825	920	819
OG0005604	AT5G19090.2	0.10468	0.07672	0.0048	0.0622	Ara1	587	662	428
OG0018058	AT5G60890.1	0.37342	0.1798	0.152794	4e-06	Ara1	295	325	279
OG0008096	AT2G38370.1	0.24162	0.2362	A:0.36640	G:0.15789	variable	522	638	494
OG0007369	AT1G56460.1	0.22299	0.10347	0.0041	0.0397	Ara1	502	521	503
OG0007892	AT1G75640.1	0.15918	0.09327	0.0044	0.0467	Ara1	1140	1147	1135
OG0007239	AT1G73177.1	0.10792	0.0001	0.1308)-1.0000	(0.0000	Ara1	63	146	63
OG0005458	AT1G13910.1	0.31556	0.38283	0.0251	0.0655	Ara1	330	372	330
OG0017782	AT5G55130.1	0.18946	0.19305	0.0109	0.0566	Ara1	464	509	464
OG0015496	AT4G40080.1	0.2205	0.09216	0.3876)	0.2032	all1	365	369	352
OG0005508	AT1G07300.1	0.27858	0.11282	0.0053	0.0471	Ara1	128	135	128
OG0018354	AT5G37055.1	0.1307	0.0001	0.089798	0.02096	Ara1	171	231	171
OG0008931	AT3G56190.1	0.04124	0.1457	A:0.28028	G:0.38754	all1	289	289	289
OG0008861	AT5G54840.1	0.17192	0.13326	0.0059	0.0442	all1	288	289	287
OG0003125	AT5G06890.1	0.5545	999	0.0231	0	variable	66	453	64
OG0015677	AT2G04540.1	0.10144	0.05122	0.0012	0.0238	all1	461	533	422
OG0017433	AT5G10750.1	0.09239	0.11446	0.0038	0.0333	Ara1	302	302	301
OG0011904	AT1G14430.1	0.12324	0.07558	0.0042	0.0551	all1	564	1135	563
OG0015727	AT3G03860.1	0.25754	0.52861	0.0137	0.0258	all1	300	302	300
OG0017563	AT2G40095.1	0.21644	0.07203	0.0016	0.0229	Ara1	209	229	205
OG0011854	AT3G17590.1	0.08562	0.42724	0.0074	0.0174	all1	240	440	240
OG0018590	AT2G43420.1	0.31415	0.11442	0.0057	0.0496	Ara1	561	593	561
OG0017146	AT1G10620.1	0.24655	0.30091	0.2903	(0.0825	Ara1	718	742	699
OG0015302	AT2G32765.1	0.57439	0.48582	0.0358	0.0737	all1	108	111	107
OG0003450	AT1G48460.1	0.23898	0.77832	0.0148	0.019	variable	340	346	302
OG0005967	AT4G13660.1	0.17305	0.09998	0.0036	0.0355	Ara1	317	322	317
OG0005837	AT1G79190.1	0.26492	0.12952	0.0065	0.0498	Ara1	1335	1500	1305
OG0007188	AT4G37030.1	0.18247	0.32273	0.0065	0.0202	Ara1	569	936	568
OG0015252	AT1G78230.1	0.18854	0.08058	0.0059	0.0738	all1	681	725	567
OG0012708	AT4G29000.1	0.32061	0.49115	0.018	0.0367	all1	603	654	594
OG0016380	AT4G18800.1	0.01368	0.0001	0.2271)	0.0102	all1	214	214	214
OG0002696	AT2G28671.1	0.15211	0.25927	0.0304	0.1171	variable	436	511	349
OG0000582	AT3G30739.1	0.26026	0.0001	0.583945	4e-06	variable	248	546	72
OG0014094	AT1G09950.1	0.24194	0.22861	C:0.26170	A:0.23538	all1	230	253	230
OG0012658	AT5G22290.1	0.26696	0.01488	0.001	0.0701	all1	340	490	332
OG0009798	AT5G09280.1	0.23713	0.71366	0.1156	0.1619	all1	297	378	297
OG0009846	AT5G24380.1	0.08468	0.19411	0.0148	0.0764	all1	664	681	664
OG0009916	AT1G24280.1	0.16303	0.16075	0.1317	(0.0194	all1	599	640	593
OG0019888	AT2G01410.1	0.19064	0.14991	0.1828	(0.0878	variable	387	412	381
OG0012986	AT1G65540.1	0.08845	0.05646	0.004	0.0708	all1	736	806	734
OG0010039	AT5G15300.1	0.15852	0.13009	0.0052	0.0401	all1	548	573	542
OG0010169	AT2G20880.1	0.25208	0.46949	0.0159	0.0339	all1	336	356	334
OG0016544	AT5G17670.1	0.21195	999	0.0148	0	variable	309	318	310
OG0010873	AT5G57200.1	0.09436	0.00693	0.0004	0.0524	all1	591	606	578
OG0014700	AT4G29110.1	0.23943	0.19178	0.0182	0.095	all1	200	214	195
OG0010388	AT4G33410.1	0.08894	0.06474	0.05297	0.028548	all1	372	372	372
OG0016414	AT3G12540.1	0.16917	0.20261	0.039741):	0.005352,	all1	572	593	524
OG0010923	AT5G62900.1	0.17392	0.09544	(0.0269	0.2819)	all1	161	200	159
OG0014650	AT1G77750.1	0.12726	999	0.0088	0	all1	154	159	154
OG0002102	AT4G11521.1	0.36732	1.17043	0.0259	0.0221	variable	265	383	241
OG0014275	AT5G48730.1	0.12901	0.10501	(0.0439	0.4162)	all1	508	535	511
OG0016031	AT2G47210.1	0.10002	0.12893	0.0051	0.0397	all1	441	454	438
OG0004810	AT3G20290.1	0.09486	0.15372	0.005739):	0.002511,	Ara1	545	551	545
OG0004940	AT1G66810.1	0.223	0.11625	0.3997)	0.2956	Ara1	310	350	307
OG0014325	AT5G18140.1	0.24281	0.35627	0.0099	0.0279	all1	333	351	317
OG0016161	AT3G61770.1	0.12075	0.09321	0.0027	0.0295	all1	284	292	276
OG0009579	AT1G13030.1	0.36222	0.12624	0.0052	0.041	all1	608	620	604
OG0009429	AT1G30680.1	0.24579	0.29824	G:0.24315	0.106252	all1	709	821	708
OG0009250	AT2G44410.1	0.22546	0.34219	0.0093	0.0273	all1	413	474	398
OG0019835	AT3G10620.1	0.16609	0.13943	0.0054	0.039	variable	216	232	217
OG0004592	AT1G18270.2	0.16085	0.18428	0.072505	0.011562	Ara1	1373	1422	1373
OG0016648	AT3G02810.1	0.20644	0.26343	(0.0787	0.2989)	Ara1	558	605	548
OG0010084	AT1G60010.1	0.1029	0.32537	0.0116	0.0357	all1	173	179	173
OG0012390	AT4G17430.1	0.17799	0.70021	0.009	0.0128	all1	507	531	506
OG0016718	AT3G07195.1	0.39282	0.37509	0.0286	0.0762	Ara1	225	245	208
OG0006686	AT1G55910.1	0.13266	0.14917	A:0.24845	G:0.33540	variable	326	335	325
OG0014179	AT3G01920.1	0.17016	0.28466	C:0.24922	A:0.26526	all1	307	311	286
OG0006958	AT5G48580.1	0.16196	0.25913	C:0.16771	A:0.27883	variable	163	168	159
OG0006808	AT3G63400.1	0.35864	0.21895	0.0096	0.0437	Ara1	570	955	544
OG0014029	AT1G17330.1	0.27014	0.32401	(0.0576	0.1775)	all1	222	242	221
OG0016996	AT5G58360.1	0.47522	0.21055	0.115633	4e-06	Ara1	296	328	287
OG0009675	AT3G26990.1	0.22678	0.25196	A:0.29908	G:0.21080	all1	513	531	506
OG0009725	AT1G50030.1	0.0803	0.16036	0.0038	0.0239	all1	2481	2492	2481
OG0014933	AT5G54390.1	0.09615	0.06518	(0.0133	0.2028)	all1	373	406	373
OG0012404	AT1G13635.1	0.14361	0.09584	(0.0240	0.2484)	all1	311	327	310
OG0010640	AT5G24350.1	0.24745	0.16191	A:0.26098	G:0.22720	all1	2376	2564	2368
OG0006112	AT1G69830.1	0.19515	0.13267	0.0093	0.0703	Ara1	887	917	884
OG0004356	AT1G13620.1	0.59203	999	0.0107	0	Ara1	109	111	81
OG0006042	AT1G43860.1	0.09886	0.0579	0.002	0.0352	Ara1	370	373	369
OG0014398	AT5G62500.1	0.13238	0.13316	(0.0200	0.1494)	all1	293	314	284
OG0014863	AT1G75430.1	0.17376	0.09298	0.0047	0.0502	all1	290	293	289
OG0012554	AT4G03820.1	0.15739	0.14031	0.0038	0.0269	all1	437	502	430
OG0010710	AT1G44575.1	0.09431	0.52154	0.0049	0.0093	all1	265	268	265
OG0009494	AT1G24650.1	0.25932	0.4253	0.0387	0.0909	all1	886	962	878
OG0004623	AT1G23230.1	0.16543	0.19897	A:0.22388	G:0.24192	Ara1	1615	1670	1608
OG0006467	AT1G48420.1	0.13666	0.043	0.2261)	0.2252	Ara1	401	416	400
OG0010335	AT1G06780.1	0.27263	0.3302	0.0104	0.0316	all1	589	888	594
OG0012171	AT2G22740.1	0.38778	0.5948	0.0572	0.0961	all1	790	976	772
OG0010265	AT3G07700.1	0.10091	0.17051	A:0.27050	G:0.23165	all1	695	701	695
OG0012021	AT5G10940.1	0.2494	0.36855	0.0086	0.0232	all1	757	777	754
OG0004773	AT5G47850.1	0.24597	0.22388	(0.0673	0.3008)	Ara1	751	755	397
OG0006537	AT1G25390.1	0.37461	0.50636	0.0181	0.0358	Ara1	629	657	627
OG0004585	AT2G45900.1	0.4318	0.28442	0.0079	0.0277	variable	720	821	690
OG0010093	AT3G56090.1	0.05697	0.05528	0.068304	0.039401	all1	259	262	250
OG0012387	AT1G65230.1	0.23602	0.0386	0.07298	0.024636	all1	286	291	286
OG0006691	AT3G16220.1	0.41768	0.41452	0.0241	0.058	Ara1	257	316	254
OG0009247	AT2G44870.1	0.08899	0.06858	0.059619	0.113921	all1	248	309	246
OG0009732	AT3G12380.1	0.17062	0.38783	0.0083	0.0215	all1	724	742	724
OG0016981	AT4G31800.1	0.20003	0.16885	0.094756	4e-06	variable	310	344	298
OG0009483	AT4G38620.1	0.13009	0.10773	0.0016	0.0148	all1	282	297	279
OG0010657	AT1G10590.1	0.13811	0.10308	0.0086	0.0834	all1	139	169	139
OG0014924	AT3G51130.1	0.14972	0.05327	0.012207	0.014217	all1	410	722	410
OG0012413	AT4G25190.2	0.27206	0.2667	A:0.27481	G:0.17812	Ara1	394	613	393
OG0004341	AT2G22260.1	0.26365	0.21034	2.02721	0.263646	Ara1	314	651	293
OG0006105	AT4G19550.1	0.64526	1.29427	0.026	0.0201	Ara1	212	274	203
OG0004211	AT5G16715.1	0.1635	0.05431	0.0014	0.0257	Ara1	974	1207	968
OG0006055	AT1G25320.1	0.14753	0.10511	0.0052	0.0493	variable	702	705	700
OG0010707	AT5G39210.1	0.3424	0.7987	0.0237	0.0297	all1	156	157	152
OG0014874	AT4G37100.1	0.07153	0.16482	0.0081	0.0491	all1	896	900	892
OG0012543	AT5G55840.1	0.29738	0.3302	0.0102	0.0309	all1	1136	1363	1077
OG0006470	AT5G12470.1	0.13381	0.22726	0.1144	(0.0258	Ara1	386	438	381
OG0004634	AT2G01320.2	0.18697	0.19201	0.0035	0.0181	Ara1	725	1379	721
OG0012166	AT5G10090.1	0.17346	0.34778	0.0118	0.0338	all1	594	608	575
OG0010322	AT5G43180.1	0.13575	0.15133	A:0.31646	G:0.29114	all1	239	250	237
OG0010989	AT5G18430.1	0.18672	0.10513	0.008	0.076	all1	362	368	362
OG0012036	AT1G12470.1	0.09257	0.07511	0.0031	0.041	all1	988	1038	982
OG0010272	AT5G53070.1	0.06321	0.50815	0.0073	0.0143	all1	221	221	221
OG0004764	AT4G21430.1	0.36492	0.19776	0.4381	(0.1080	Ara1	927	958	923
OG0019068	AT1G69588.1	0.53328	0.32192	G:0.28226	position	variable	124	124	124
OG0016397	AT2G42570.1	0.16066	0.05441	(0.0024	0.0430)	all1	367	381	363
OG0002681	AT4G13955.1	0.54895	0.3551	0.5487)	0.7302	variable	94	132	86
OG0006209	AT5G15410.1	0.07875	0.12217	0.06562	0.069954	Ara1	726	819	720
OG0006359	AT2G37680.1	0.06339	0.0001	0.1187)	0.0311	Ara1	215	448	215
OG0004538	AT5G05360.1	0.2336	0.12268	(0.0287	0.2339)	Ara1	163	478	155
OG0012991	AT1G65650.1	0.11442	1.21911	0.0135	0.0111	all1	330	330	329
OG0004468	AT5G58350.1	0.21056	0.10686	0.031498	0.076747	Ara1	571	1044	571
OG0009851	AT2G41120.1	0.25605	0.17207	(0.0573	0.3315)	all1	261	299	260
OG0009901	AT5G39350.1	0.16926	0.13929	A:0.31352	G:0.33135	all1	677	678	673
OG0004689	AT2G34090.2	0.15568	0.08858	(0.0269	0.3001)	Ara1	445	853	436
OG0014717	AT4G35220.1	0.13897	0.1163	(0.0410	0.3515)	all1	272	276	272
OG0010864	AT3G27880.1	0.22752	0.11991	0.4774)	0.3522	all1	242	297	230
OG0014647	AT1G56310.1	0.2348	0.64374	0.0264	0.0411	all1	589	611	569
OG0016403	AT3G51780.1	0.21213	0.20094	A:0.26642	G:0.28501	all1	269	276	269
OG0010934	AT1G02140.1	0.15595	0.17716	(0.0364	0.2045)	all1	150	171	150
OG0016026	AT3G60300.1	0.27412	0.17889	0.0102	0.0571	all1	366	384	351
OG0014262	AT1G64450.1	0.17997	0.19578	0.0091	0.0463	all1	342	426	336
OG0014999	AT4G18375.2	0.41524	0.76438	0.0164	0.0215	all1	393	625	397
OG0004807	AT2G22870.1	0.08775	0.01802	0.3172)	0.0478	variable	300	304	298
OG0004957	AT4G27980.1	0.47932	0.45176	0.026	0.0576	Ara1	565	1110	518
OG0016176	AT5G02200.1	0.5267	1.06204	0.009	0.0084	all1	181	287	178
OG0014332	AT1G69310.1	0.22185	0.36491	0.0205	0.0563	all1	287	314	262
OG0013668	AT2G30020.1	0.10873	0.08315	0.0057	0.0688	all1	396	410	358
OG0007885	AT5G38860.1	0.32981	0.61111	0.0145	0.0236	variable	298	305	286
OG0013738	AT3G12600.1	0.14907	0.29164	0.0152	0.052	all1	180	216	179
OG0018636	AT3G02330.1	0.19179	0.2088	0.0125	0.06	Ara1	903	909	900
OG0018343	AT5G52170.1	0.16065	0.46471	0.0088	0.0188	variable	682	740	671
OG0008926	AT5G50820.1	0.16145	0.03391	0.3347)	0.0868	all1	193	201	193
OG0008876	AT2G37990.1	0.22459	0.10644	0.2147	(0.0520	all1	318	336	315
OG0003978	AT4G37630.1	0.25851	0.43458	0.013	0.0298	Ara1	323	352	314
OG0003283	AT4G31200.1	0.16177	0.04692	0.041322	0.022388	Ara1	650	664	641
OG0011159	AT5G19350.2	0.20921	0.05028	0.0037	0.0744	all1	425	452	413
OG0017795	AT1G21340.1	0.1489	999	0.0018	0	Ara1	260	269	259
OG0015481	AT3G48540.1	0.17605	0.1973	(0.0501	0.2542)	all1	232	269	231
OG0011009	AT5G50890.1	0.09982	0.08739	0.0057	0.0654	all1	408	416	385
OG0003828	AT1G09730.1	0.3532	0.30423	0.0133	0.0438	Ara1	963	1062	932
OG0001376	AT3G15351.1	0.16249	0.0748	1.59083	0.162487	variable	165	173	118
OG0017424	AT2G31750.1	0.1509	0.03396	0.002	0.0593	Ara1	456	460	456
OG0011913	AT1G12980.1	0.52011	0.25653	C:0.27915	A:0.23322	all1	328	344	326
OG0015660	AT2G32250.1	0.30638	0.27535	G:0.30931	0.124626	variable	807	890	798
OG0017574	AT1G66420.1	0.47249	0.25649	0.0684	0.2667	Ara1	282	478	155
OG0011843	AT4G20100.1	0.31857	0.2255	A:0.25547	G:0.19708	all1	288	320	277
OG0015730	AT1G17510.1	0.36546	0.37242	(0.0897	0.2406)	all1	122	243	104
OG0001226	AT1G14610.1	0.16563	0.14024	(0.0331	0.2349)	variable	1108	1132	1108
OG0017151	AT1G69900.1	0.18095	0.32658	0.0198	0.0605	Ara1	397	1157	393
OG0003447	AT2G38560.1	0.21539	0.23085	C:0.24119	A:0.36856	variable	378	767	375
OG0005970	AT3G13690.1	0.08374	0.07229	(0.0250	0.3451)	Ara1	753	755	751
OG0003517	AT1G18480.1	0.14832	0.20665	G:0.26854	position	variable	391	434	391
OG0005820	AT3G59490.1	0.26915	0.11739	0.0088	0.0748	Ara1	243	294	243
OG0013489	AT2G17560.1	0.1037	0.0001	0.0464)	lnL(ntime:	all1	138	144	139
OG0015245	AT4G34790.1	0.15732	0.0001	0.094194	0.020872	all1	108	111	105
OG0017001	AT5G28300.1	0.30385	0.21525	0.3005	(0.0643	Ara1	619	654	592
OG0008419	AT5G08310.1	0.23055	0.16803	0.0077	0.0458	variable	832	956	830
OG0018587	AT1G04540.1	0.1522	0.0505	0.321874	0.18123	Ara1	601	621	590
OG0008549	AT1G10385.1	0.08727	0.06599	0.0034	0.0509	all1	754	779	754
OG0018805	AT3G24770.1	0.45487	0.0001	0.098273	0.037012	variable	99	105	99
OG0008260	AT4G10955.1	0.09596	0.14411	0.0084	0.0581	Ara1	350	365	350
OG0008330	AT4G04500.1	0.39613	0.57435	0.0184	0.0321	variable	646	1265	636
OG0018955	AT2G17787.1	0.44416	0.3514	G:0.24046	0.147674	variable	324	403	300
OG0017728	AT4G08320.1	0.17921	0.39337	0.0148	0.0377	variable	426	462	428
OG0003895	AT1G67500.1	0.3467	0.34449	0.0034	0.0098	Ara1	1890	2011	1891
OG0015019	AT3G14920.1	0.23249	0.27698	0.0121	0.0437	all1	609	635	610
OG0011491	AT1G73820.1	0.06287	0.0001	0.096687	0.03516	all1	193	217	193
OG0005187	AT3G01210.1	0.26292	0.34404	0.0094	0.0274	Ara1	249	267	249
OG0007293	AT5G42800.1	0.19811	0.09157	0.0026	0.0282	variable	382	448	383
OG0007968	AT1G16060.1	0.12785	0.27625	0.0088	0.0318	Ara1	345	349	331
OG0013785	AT5G49650.1	0.11634	0.1108	(0.0331	0.2975)	all1	558	564	558
OG0015149	AT1G11440.1	0.29314	0.34334	0.0359	0.1046	all1	363	406	329
OG0008715	AT5G03940.1	0.09532	0.05036	0.0008	0.0153	all1	564	568	562
OG0008645	AT1G57770.1	0.10396	0.05964	0.0033	0.055	all1	574	588	573
OG0015853	AT3G29810.1	0.23264	0.19753	A:0.32346	G:0.23235	all1	441	503	439
OG0013564	AT5G14270.1	0.24172	0.26217	0.198207	0.025123	all1	688	754	689
OG0011720	AT4G22220.1	0.12316	0.04727	(0.0134	0.2815)	all1	167	170	167
OG0007072	AT3G59380.1	0.20419	0.06182	0.0031	0.0494	Ara1	326	381	324
OG0005236	AT4G14605.1	0.08268	0.32182	C:0.21414	A:0.29314	Ara1	493	517	485
OG0007122	AT3G54930.1	0.05058	0.14161	0.0062	0.0436	Ara1	497	499	491
OG0005366	AT2G17550.1	0.15175	0.3038	0.0095	0.0313	Ara1	779	805	782
OG0015903	AT4G36800.1	0.02452	0.0001	0.1416)-1.0000	(0.0000	all1	184	184	184
OG0013434	AT5G06480.1	0.35329	0.0001	0.102496	0.008644	all1	153	154	153
OG0011670	AT5G46790.1	0.1443	0.06947	0.3701)	0.1961	all1	221	259	215
OG0008081	AT2G39190.1	0.25532	0.15608	0.0052	0.0333	Ara1	374	827	777
OG0005743	AT4G18990.1	0.104	0.04828	(0.0031	0.0656)	Ara1	357	376	276
OG0007507	AT3G46110.1	0.29088	0.20619	A:0.23871	G:0.26452	Ara1	343	392	310
OG0011255	AT5G41590.1	0.32529	0.31125	0.0145	0.0466	all1	221	225	221
OG0013011	AT1G30270.1	0.06988	0.00946	0.2174)	0.0305	variable	482	486	475
OG0017499	AT3G01170.1	0.11232	999	0.0045	0	Ara1	215	235	227
OG0011305	AT1G77670.1	0.10736	0.11339	(0.0239	0.2106)	all1	440	461	400
OG0013141	AT5G25580.1	0.40199	0.29384	C:0.19012	A:0.27654	all1	405	442	407
OG0005613	AT5G59710.1	0.115	0.09853	0.002	0.0204	Ara1	614	755	615
OG0007457	AT2G39270.1	0.13082	0.10483	(0.0278	0.2648)	variable	295	312	295
OG0008908	AT1G10350.1	0.07318	0.02806	0.3735)	0.0484	all1	349	356	342
OG0018896	AT4G28088.1	0.03453	0.0001	0.4451)-1.0000	(0.0000	variable	77	77	76
OG0008858	AT3G49220.1	0.11438	0.14285	0.070904	0.107948	all1	598	610	598
OG0013333	AT1G08650.1	0.09957	0.03404	0.3851)	0.0983	all1	284	306	284
OG0007625	AT1G29000.1	0.19522	0.31359	0.1967	(0.0418	Ara1	287	290	174
OG0003956	AT3G21070.1	0.14334	0.24321	A:0.30266	G:0.18447	Ara1	479	543	490
OG0005461	AT5G06130.2	0.07785	0.18843	0.007	0.037	Ara1	231	330	231
OG0007775	AT3G61670.1	0.14668	0.27843	0.0111	0.0397	Ara1	790	848	786
OG0003806	AT3G61360.1	0.15406	0.18669	A:0.30149	G:0.23509	variable	498	500	492
OG0005531	AT4G28990.1	0.32824	0.40514	0.0177	0.0436	Ara1	347	376	339
OG0013263	AT1G72160.1	0.12642	0.25432	0.0067	0.0264	all1	490	518	474
OG0011027	AT3G07090.1	0.19264	0.50141	0.0127	0.0252	all1	265	267	245
OG0013998	AT1G49130.1	0.39456	0.24091	0.184505	0.036675	all1	326	517	309
OG0005114	AT2G30500.1	0.20831	0.37183	0.0124	0.0334	Ara1	517	549	503
OG0007350	AT5G64240.2	0.3234	0.05052	0.1257)	0.4157	variable	305	367	330
OG0011402	AT2G35170.1	0.21019	0.30692	0.0209	0.068	all1	484	524	470
OG0013646	AT4G35500.1	0.09969	0.05332	0.0027	0.0506	all1	438	440	440
OG0017865	AT4G10770.1	0.07481	0.12175	0.0037	0.0301	Ara1	766	771	760
OG0011552	AT4G31140.1	0.16	0.07376	(0.0195	0.2629)	all1	484	485	484
OG0013716	AT5G41050.1	0.27326	0.28089	G:0.19444	Average	all1	172	180	168
OG0003688	AT1G72990.1	0.24775	0.334	0.0048	0.0144	Ara1	697	728	680
OG0005044	AT1G55350.1	0.10919	0.1956	A:0.24623	G:0.24996	Ara1	2151	2263	2151
OG0007200	AT1G01150.1	0.52953	0.04362	0.0055	0.1252	Ara1	345	507	98
OG0003469	AT3G19760.1	0.04799	0.05929	0.0031	0.053	variable	408	411	408
OG0015990	AT2G27220.1	0.40017	0.22342	0.3847	(0.0725	Ara1	431	475	428
OG0003539	AT1G19485.1	0.29464	0.28724	0.009	0.0314	Ara1	815	1272	812
OG0008437	AT4G11810.1	0.10003	0.07656	0.019102	0.025671	all1	707	744	698
OG0008567	AT1G60080.1	0.1174	0.1025	0.0036	0.035	all1	302	368	302
OG0008142	AT1G03290.1	0.45715	0.58331	0.024	0.0411	Ara1	571	590	561
OG0008012	AT5G63260.1	0.33707	0.25774	C:0.22745	A:0.28314	Ara1	435	457	425
OG0013082	AT1G33990.1	0.0603	0.07469	(0.0126	0.1693)	all1	348	355	345
OG0007594	AT3G59960.1	0.36862	0.43323	0.0179	0.0413	Ara1	329	424	297
OG0005680	AT5G41950.1	0.14638	0.10462	0.093241	0.066668	Ara1	565	807	525
OG0011396	AT1G74080.1	0.37828	0.33897	0.0181	0.0533	all1	333	363	309
OG0003765	AT3G02760.1	0.25396	0.29643	C:0.19406	A:0.32648	Ara1	883	923	876
OG0007816	AT1G44090.1	0.22543	0.08372	0.0103	0.1228	Ara1	385	390	353
OG0017988	AT3G22540.1	0.06674	0.30204	0.123899	0.011128	Ara1	110	111	109
OG0017273	AT1G63300.1	0.19594	0.13814	C:0.18289	A:0.33825	variable	1029	1170	1017
OG0015037	AT3G57300.1	0.23075	0.31573	C:0.15564	A:0.29526	all1	1507	1552	1500
OG0017323	AT2G34060.1	0.13782	0.19054	A:0.29072	G:0.32894	variable	346	351	276
OG0015167	AT5G57140.1	0.212	0.17499	0.0168	0.0958	all1	397	425	396
OG0003635	AT1G71250.1	0.30457	0.26766	(0.0480	0.1790)	Ara1	374	404	367
OG0007946	AT5G02180.1	0.17738	0.23805	A:0.24359	G:0.19475	Ara1	550	939	546
OG0018280	AT5G41600.1	0.12908	0.49697	0.0167	0.0337	Ara1	257	261	256
OG0015542	AT5G07610.1	0.39805	0.50004	0.0384	0.0767	all1	420	441	337
OG0013875	AT4G21510.1	0.25799	0.21576	(0.0953	0.4413)	variable	225	286	207
OG0017706	AT5G54080.1	0.09569	0.26362	C:0.26522	A:0.29565	Ara1	461	476	460
OG0003210	AT4G26220.1	0.16289	0.48417	0.013	0.0269	Ara1	232	292	232
OG0007698	AT1G53210.1	0.12782	0.15711	0.098749	0.037335	Ara1	585	592	583
OG0001104	AT1G10095.1	0.40322	999	0.0038	0	variable	420	441	417
OG0003340	AT2G46060.1	0.19396	0.27569	C:0.15902	A:0.28088	Ara1	807	1251	808
OG0015412	AT2G18800.1	0.23752	0.26545	0.0156	0.0588	all1	305	313	304
OG0013925	AT5G07360.1	0.16366	0.04232	0.0032	0.0768	all1	659	759	565
OG0018061	AT2G43130.1	0.02999	0.0001	0.2774)-1.0000	(0.0000	Ara1	214	214	213
OG0011980	AT2G33310.1	0.13425	0.11178	(0.0336	0.3018)	Ara1	246	252	240
OG0007529	AT1G53750.1	0.00848	0.03286	(0.0071	0.2164)	Ara1	426	426	426
OG0007479	AT4G32570.1	0.33052	0.61717	0.0111	0.018	Ara1	361	378	247
OG0005218	AT1G31010.1	0.39483	0.56029	0.0133	0.0237	Ara1	360	394	352
OG0015386	AT3G02680.1	0.36147	0.33945	0.0051	0.015	all1	542	988	536
OG0017092	AT1G60870.1	0.06967	0.04796	0.003	0.0634	Ara1	147	148	147
OG0003584	AT2G02955.1	0.39589	0.36061	0.0226	0.0626	Ara1	666	799	657
OG0018514	AT4G02040.1	0.70806	1.01468	0.048	0.0473	Ara1	152	175	153
OG0006961	AT5G50090.1	0.18497	0.17724	0.0026	0.0148	variable	159	180	156
OG0002612	AT5G01290.1	0.18006	0.17767	C:0.21713	A:0.29358	Ara1	657	862	654
OG0014140	AT4G18425.1	0.16011	0.08202	0.0075	0.091	all1	213	251	213
OG0016304	AT5G13340.1	0.09506	0.03823	(0.0061	0.1578)	all1	242	243	208
OG0014010	AT5G63950.1	0.29887	0.24742	C:0.19584	A:0.31897	all1	1090	1243	1091
OG0016254	AT5G67370.1	0.13136	0.29325	G:0.20370	position	all1	327	360	324
OG0010498	AT1G18610.1	0.26902	0.28323	0.0088	0.0311	all1	556	589	544
OG0016671	AT4G04025.1	0.27492	0.12042	0.0025	0.0205	Ara1	176	199	184
OG0014435	AT1G75410.1	0.09435	0.05392	0.0034	0.0639	all1	524	568	507
OG0012902	AT4G26840.1	0.05241	0.0001	0.1747)-1.0000	(0.0000	all1	100	105	98
OG0016721	AT4G02120.1	0.10969	0.242	0.0041	0.0168	Ara1	556	626	556
OG0014565	AT1G32770.1	0.17802	999	0.0013	0	all1	358	381	357
OG0012852	AT1G31170.1	0.11472	0.0338	0.1500)	0.1008	all1	125	148	125
OG0009339	AT1G09380.1	0.2415	0.31687	0.0137	0.0433	all1	374	396	374
OG0009269	AT2G21080.1	0.24704	0.27722	0.0089	0.0321	Ara1	414	414	414
OG0009992	AT4G36750.1	0.11106	0.04661	0.0027	0.0571	all1	273	278	273
OG0014784	AT5G44670.1	0.14547	0.07222	0.0036	0.0494	all1	519	539	503
OG0012148	AT4G24930.1	0.21527	0.18998	0.0048	0.0251	all1	225	236	223
OG0000839	AT3G04720.1	0.14709	0.06295	0.3920)	0.077878	variable	212	315	190
OG0002186	AT3G58590.1	0.33813	0.26157	0.375	(0.0975	Ara1	741	743	740
OG0012018	AT3G48770.1	0.21373	0.18044	A:0.29401	G:0.30634	all1	1899	1914	1704
OG0016490	AT2G36410.1	0.13402	0.0001	0.158115	0.051831	variable	195	215	185
OG0009088	AT1G76050.1	0.18997	0.0001	0.308556	0.040665	all1	313	962	382
OG0019116	AT5G39230.1	0.53086	0.08214	0.2969)	0.5326	variable	119	181	89
OG0019046	AT5G64980.1	0.43561	0.31618	0.0149	0.0472	variable	344	606	333
OG0004894	AT2G27900.2	0.20516	0.16648	0.1912	(0.0304	variable	1124	1162	1072
OG0010679	AT3G01670.1	0.24719	0.15415	0.0065	0.042	all1	822	848	822
OG0010729	AT2G47920.1	0.28007	0.20462	A:0.31239	G:0.24433	Ara1	225	238	216
OG0014488	AT1G73020.1	0.19859	0.08683	0.135295	2.00674	all1	665	673	664
OG0010000	AT3G29590.1	0.24774	0.07688	0.4180)	0.1944	Ara1	449	621	446
OG0012244	AT1G26750.1	0.16012	0.24206	0.0141	0.0582	all1	195	519	193
OG0002821	AT1G69640.1	0.06987	0.06491	0.0023	0.0348	variable	260	260	258
OG0004516	AT3G61590.1	0.06573	0.2262	0.109253	0.025214	Ara1	411	446	406
OG0006752	AT2G38330.1	0.17076	0.01987	0.2100)	0.1058	variable	521	609	510
OG0004446	AT5G19840.1	0.35914	0.26442	(0.0618	0.2337)	Ara1	533	608	523
OG0006602	AT5G10620.1	0.20635	0.0001	0.103823	0.012128	Ara1	193	196	188
OG0010150	AT5G24740.1	0.33776	0.43037	0.0104	0.0241	all1	3464	3567	3275
OG0012314	AT5G59400.1	0.17145	0.06301	0.0033	0.0525	all1	299	369	298
OG0009384	AT1G48280.1	0.17819	0.25414	0.0083	0.0327	all1	558	575	557
OG0006227	AT5G18760.1	0.27357	0.18753	(0.0679	0.3611)	Ara1	411	446	396
OG0004063	AT3G21250.1	0.19865	0.15402	0.004	0.0261	variable	1453	2026	1453
OG0012731	AT1G69700.1	0.08151	0.0001	0.074791	4e-06	all1	184	201	184
OG0010575	AT1G73200.1	0.25544	0.2839	0.3221	(0.0842	all1	779	820	775
OG0012661	AT3G16170.1	0.18222	0.17299	(0.0466	0.2681)	all1	608	613	603
OG0010425	AT4G01150.1	0.38045	0.03494	0.1050)	0.3727	all1	164	169	162
OG0006377	AT1G61150.4	0.08198	0.10293	0.0064	0.0619	Ara1	243	247	243
OG0004133	AT5G50110.1	0.11914	0.0534	0.040137	0.144462	variable	292	476	207
OG0009540	AT1G68660.1	0.08044	0.40791	0.0083	0.0204	all1	159	159	159
OG0009410	AT5G39830.1	0.09356	0.11216	0.030616	0.024218	all1	448	496	448
OG0006196	AT3G14270.1	0.18519	0.16966	(0.0309	0.1812)	Ara1	1791	1825	1783
OG0004829	AT5G17340.1	0.23608	0.37827	0.0427	0.1129	Ara1	160	177	159
OG0012480	AT4G22600.1	0.19428	0.17452	0.0194	0.1111	all1	273	274	218
OG0016008	AT5G18810.1	0.35645	0.09638	0.0041	0.0427	all1	236	277	242
OG0016158	AT1G04670.1	0.12558	0.92821	0.0134	0.0144	all1	126	130	125
OG0010794	AT3G62910.1	0.12916	0.16992	C:0.19904	A:0.28297	all1	422	451	417
OG0004979	AT1G75700.1	0.26912	0.31354	0.0203	0.0649	Ara1	177	196	168
OG0004282	AT1G49590.1	0.10422	0.68486	0.0057	0.0083	Ara1	242	508	242
OG0014739	AT3G01970.1	0.12017	0.14707	(0.0426	0.2897)	all1	147	177	124
OG0014669	AT2G35010.2	0.29669	0.0001	0.163589	0.041703	all1	194	201	189
OG0009035	AT4G11175.1	0.10251	0.0001	0.190505	0.015898	all1	141	142	140
OG0009165	AT5G51910.2	0.29255	1.69736	0.0301	0.0177	Ara1	293	345	289
OG0009393	AT3G55240.1	0.12559	0.0001	0.0580)-1.0000	(0.0000	all1	95	96	95
OG0009868	AT4G26450.1	0.27349	0.16654	A:0.26160	G:0.21800	all1	708	1271	711
OG0009938	AT5G20610.1	0.26867	0.47156	0.0131	0.0279	all1	1164	1255	1165
OG0012253	AT1G12040.1	0.2169	0.23519	0.0113	0.0483	all1	744	782	618
OG0010017	AT3G47730.1	0.11884	0.12613	(0.0444	0.3502)	all1	983	1009	980
OG0006745	AT5G41110.1	0.33767	0.29859	(0.0541	0.1806)	Ara1	621	656	618
OG0002966	AT3G62230.1	0.3665	0.92693	0.3646	(0.3495	Ara1	461	495	462
OG0004451	AT4G20300.1	0.19486	0.22769	A:0.33030	G:0.22121	Ara1	339	411	330
OG0012303	AT5G10050.1	0.10185	0.11651	0.0086	0.0738	Ara1	279	283	279
OG0010147	AT4G33330.1	0.11914	0.21376	A:0.28052	G:0.24872	all1	596	608	591
OG0004074	AT4G09670.1	0.13484	0.07381	(0.0147	0.1966)	variable	362	421	362
OG0006230	AT1G30010.1	0.1368	0.02857	0.2411)	0.0956	variable	711	714	711
OG0016855	AT5G09660.1	0.09307	0.0001	0.08277	0.002745	Ara1	354	358	354
OG0010562	AT2G46140.1	0.17748	0.0001	0.113969	0.014521	all1	166	166	166
OG0016905	AT1G74350.1	0.19821	0.23576	0.0071	0.0299	variable	753	879	744
OG0010432	AT1G11380.1	0.23213	0.13555	0.0105	0.0771	all1	254	259	249
OG0012676	AT5G07590.1	0.0415	0.0001	0.096511	0.006454	all1	458	460	458
OG0004124	AT5G48330.1	0.25734	0.24091	G:0.41280	position	Ara1	455	465	453
OG0006360	AT3G03330.1	0.13274	0.38832	0.0025	0.0065	Ara1	328	353	328
OG0019778	AT3G43520.1	0.1795	0.38353	0.0189	0.0494	Ara1	240	300	238
OG0019628	AT1G47610.1	0.09788	0.02236	0.0014	0.0628	variable	351	421	350
OG0006181	AT5G44450.1	0.15196	0.08827	0.0051	0.0573	Ara1	276	336	191
OG0012497	AT5G42090.1	0.0464	0.00246	0.0002	0.0871	all1	439	447	435
OG0010783	AT1G29670.1	0.16669	0.1067	0.5434)	0.1345	all1	363	1109	363
OG0004295	AT1G29200.2	0.19573	0.11206	0.0096	0.0858	Ara1	495	666	611
OG0002459	AT5G46380.1	1.03095	0.9638	0.0212	0.022	variable	607	1054	380
OG0009557	AT1G69210.1	0.39353	0.29101	(0.0853	0.2921)	variable	305	325	301
OG0009407	AT3G08960.1	0.15308	0.13502	0.1133	(0.0173	all1	1010	1036	998
OG0009022	AT5G65990.1	0.10437	0.04804	0.0034	0.0706	all1	427	457	426
OG0009172	AT4G30935.1	0.29395	0.30789	G:0.35903	position	all1	466	807	460
OG0006976	AT1G04620.1	0.11796	0.23209	0.0054	0.0231	Ara1	462	490	445
OG0016313	AT1G21090.1	0.23858	0.16514	0.135724	0.021364	all1	242	245	232
OG0014157	AT1G76740.1	0.65913	0.9841	0.019	0.0193	all1	1532	2378	618
OG0016243	AT2G03510.1	0.08757	0.09844	0.1272	(0.0061	all1	356	358	356
OG0014007	AT4G14480.1	0.11626	0.16604	0.0054	0.0326	all1	487	491	484
OG0004199	AT2G46830.1	0.29445	0.25173	(0.0648	0.2571)	Ara1	608	680	587
OG0002755	AT2G17380.1	0.02074	0.0001	0.1920)-1.0000	(0.0000	variable	161	198	161
OG0006826	AT3G49380.1	0.44903	0.21776	A:0.30065	G:0.20915	Ara1	352	370	306
OG0009985	AT1G01490.1	0.09113	0.0001	0.032365	0.01728	all1	177	181	173
OG0014422	AT4G17070.1	0.2163	0.13876	(0.0433	0.3103)	all1	343	369	338
OG0012915	AT5G44010.1	0.23887	0.38857	0.0166	0.0427	all1	357	399	357
OG0016666	AT1G76970.1	0.2883	0.14512	0.0059	0.0405	Ara1	446	825	429
OG0014572	AT3G14810.1	0.21338	0.27753	C:0.19635	A:0.25342	all1	881	930	876
OG0012845	AT2G38360.1	0.07133	0.25254	0.1276	(0.0439	all1	220	253	220
OG0016736	AT1G65610.1	0.11216	0.08105	0.0058	0.0714	Ara1	623	632	623
OG0019101	AT4G12420.1	0.0761	0.38732	0.0086	0.0221	variable	587	614	586
OG0019051	AT5G50870.1	0.10063	0.0587	0.005	0.0859	variable	192	211	192
OG0014793	AT3G56250.1	0.42721	0.64374	0.0341	0.053	all1	222	246	216
OG0006449	AT5G50740.1	0.13635	0.0001	0.099149	4e-06	variable	283	304	284
OG0016487	AT3G09600.1	0.26488	0.25462	0.2562	(0.0553	variable	298	337	296
OG0004378	AT4G35785.1	0.26618	0.21524	0.0087	0.0406	Ara1	187	360	156
OG0004228	AT1G44910.1	0.23045	0.2124	0.0116	0.0548	Ara1	958	975	951
OG0007801	AT4G32480.1	0.21175	0.04674	0.0049	0.1045	Ara1	287	369	285
OG0003772	AT5G55960.1	0.07847	0.08994	(0.0329	0.3641)	variable	648	658	647
OG0015020	AT4G28040.4	0.18745	0.08477	0.007315	0.041406	all1	359	361	359
OG0017264	AT1G53190.1	0.1813	0.23054	A:0.28677	G:0.22065	Ara1	494	514	494
OG0015170	AT2G25790.1	0.28786	0.25032	(0.0670	0.2679)	all1	960	968	958
OG0007951	AT4G26770.1	0.15922	0.23477	A:0.22128	G:0.23191	Ara1	471	508	470
OG0017711	AT4G22490.1	0.40142	0.35247	0.0096	0.0274	Ara1	120	338	120
OG0015555	AT3G11220.1	0.15784	0.04504	0.0025	0.0565	all1	355	419	354
OG0013862	AT3G04090.1	0.19163	0.12215	(0.0266	0.2166)	all1	240	246	239
OG0003357	AT5G56780.1	0.24142	0.06087	0.2175)	0.3056	Ara1	483	922	481
OG0015405	AT2G30300.1	0.16752	0.41136	0.1528	(0.0746	all1	500	523	499
OG0013932	AT5G65760.1	0.18518	0.26001	G:0.22807	position	all1	515	533	513
OG0008259	AT4G35190.1	0.20497	0.75861	0.0059	0.0078	Ara1	228	254	221
OG0018297	AT5G14700.1	0.1186	0.37112	0.0117	0.0316	Ara1	368	378	367
OG0008309	AT3G11650.1	0.17145	0.37806	0.0093	0.0246	variable	240	263	241
OG0013028	AT4G38960.1	0.14053	0.06211	0.0048	0.077	all1	183	212	183
OG0011997	AT1G72980.1	0.55166	0.83574	(0.0077	0.0092)	Ara1	214	233	167
OG0001809	AT2G31305.1	0.10396	0.0001	0.118395	4e-06	variable	107	142	106
OG0013178	AT2G37370.1	0.15946	0.08737	0.0076	0.0865	all1	669	709	660
OG0018076	AT5G47440.1	0.37962	0.22779	0.0079	0.0348	variable	406	438	405
OG0018453	AT2G33847.1	0.3886	2.29205	0	0	Ara1	93	99	93
OG0015391	AT5G56230.1	0.33181	0.16009	0.4096	(0.1033	variable	186	256	185
OG0011719	AT2G30010.1	0.15072	0.15288	0.004	0.0259	all1	398	406	395
OG0011649	AT1G71110.1	0.27657	0.30484	C:0.22432	A:0.25310	all1	557	618	553
OG0017085	AT5G49400.1	0.12881	0.24096	0.0161	0.0666	Ara1	275	405	275
OG0003593	AT2G13360.2	0.04165	0.0443	0.0035	0.0785	Ara1	401	401	401
OG0011160	AT1G55805.1	0.15632	0.0001	0.15725	0.047476	variable	160	423	151
OG0013324	AT1G14205.1	0.1502	0.23945	0.01	0.0416	all1	169	256	164
OG0003941	AT3G05440.1	0.35597	0.23303	Average	T:0.29345	variable	122	191	117
OG0005476	AT5G06850.1	0.04773	0.14211	0.0029	0.0201	Ara1	794	794	794
OG0007632	AT3G18730.1	0.28508	0.37461	0.0171	0.0456	Ara1	1311	1329	1299
OG0003811	AT5G04070.1	0.29799	0.33665	0.0159	0.0472	Ara1	359	413	358
OG0005526	AT5G62730.1	0.19502	0.07738	0.008	0.1034	Ara1	589	602	557
OG0007762	AT2G18410.1	0.20391	0.0796	0.0058	0.0724	Ara1	374	389	374
OG0011030	AT1G80480.1	0.16191	0.07381	0.020464	0.099633	all1	444	462	429
OG0013274	AT5G42890.1	0.06141	0.28025	0.088615	0.041098	all1	123	123	123
OG0018881	AT2G34080.1	0.22496	0.16992	(0.0670	0.3922)	variable	345	359	344
OG0008791	AT1G24020.1	0.16902	0.12778	0.011	0.086	all1	155	158	155
OG0007347	AT1G02160.2	0.23351	0.0001	0.0211)	0.8588	Ara1	71	132	71
OG0005103	AT5G05740.1	0.17139	0.52434	0.0058	0.0111	Ara1	556	585	526
OG0013651	AT1G27520.1	0.23918	0.0272	0.2326)	0.2404	all1	574	610	483
OG0011415	AT5G19150.1	0.18002	0.07569	3.04657	0.180023	all1	365	375	366
OG0013701	AT5G43540.1	0.19821	0.23272	(0.0827	0.3565)	all1	137	144	136
OG0017872	AT5G56320.1	0.12384	0.0001	0.028962	0.027505	Ara1	255	255	229
OG0011545	AT1G59710.1	0.09971	0.28033	0.0163	0.0583	all1	300	311	291
OG0017389	AT3G22550.1	0.20279	0.20634	C:0.19847	A:0.34733	Ara1	267	280	262
OG0007217	AT5G15510.1	0.22515	0.29357	0.004	0.0136	Ara1	497	547	492
OG0005053	AT4G11690.1	0.19657	0.19106	0.0082	0.0428	variable	566	587	560
OG0008420	AT1G28300.1	0.48105	1.19127	0.0458	0.0385	all1	363	430	353
OG0008570	AT1G05370.1	0.14544	0.0001	0.088942	0.01917	all1	417	500	416
OG0005949	AT3G07030.1	0.3164	0.20278	(0.0441	0.2166)	Ara1	405	531	297
OG0017038	AT1G01860.1	0.3384	0.12575	0.0064	0.0505	Ara1	343	360	325
OG0013095	AT1G23390.1	0.34959	0.1857	G:0.32115	0.214759	all1	394	431	384
OG0015659	AT2G25930.1	0.29603	0.62664	0.0078	0.0124	all1	695	754	653
OG0007583	AT2G43090.1	0.11267	0.10369	(0.0090	0.0877)	Ara1	251	272	250
OG0005697	AT3G59400.1	0.18095	0.07141	0.2777)	0.23	Ara1	265	275	254
OG0015709	AT3G02170.1	0.29949	0.4237	0.0153	0.0362	all1	905	909	892
OG0011381	AT4G04180.1	0.18959	0.16785	0.1953	(0.0254	all1	600	1153	585
OG0008155	AT4G26470.1	0.07897	0.03753	0.0021	0.0548	Ara1	231	236	228
OG0008005	AT3G57660.1	0.23592	0.21103	0.0096	0.0455	Ara1	1670	1694	1427
OG0015438	AT1G15370.1	0.03145	0.0001	0.1132)-1.0000	(0.0000	all1	147	228	147
OG0015568	AT5G47940.1	0.41013	0.38496	(0.0867	0.2253)	all1	749	812	722
OG0018951	AT3G19610.1	0.22361	0.49682	0.0142	0.0285	variable	640	656	600
OG0008264	AT2G17280.1	0.19369	0.55074	0.0166	0.0301	Ara1	271	516	270
OG0018801	AT1G69510.1	0.14173	0.12735	0.142679	4e-06	variable	137	152	141
OG0008641	AT3G56000.1	0.15362	0.30031	C:0.18164	A:0.28235	all1	535	540	523
OG0008711	AT5G59830.1	0.10896	0.08666	(0.0199	0.2295)	all1	425	477	423
OG0013781	AT3G11820.1	0.1452	0.10611	(0.0280	0.2639)	all1	346	368	340
OG0017309	AT3G51750.1	0.69472	0.19429	C:0.16667	A:0.38365	Ara1	110	122	109
OG0007297	AT4G24470.2	0.18702	1.88676	0.014293	0.063692	Ara1	309	319	309
OG0005183	AT1G53390.1	0.19984	0.20513	0.104982	0.017845	Ara1	1109	2222	1082
OG0017259	AT2G03200.1	0.16335	0.11368	(0.0243	0.2119)	Ara1	461	470	461
OG0013430	AT3G02570.1	0.10592	0.13215	0.0063	0.0479	all1	432	432	432
OG0015907	AT3G15840.1	0.11257	0.05053	0.0028	0.0546	all1	268	272	266
OG0011674	AT3G16070.1	0.27172	0.95264	0.0102	0.0107	all1	150	195	150
OG0007126	AT2G39080.1	0.24395	0.18925	0.0032	0.0168	Ara1	351	356	340
OG0005362	AT2G20100.1	0.39868	0.06003	0.0013	0.021	Ara1	362	380	333
OG0005899	AT5G39400.1	0.15994	0.04364	0.0021	0.0472	Ara1	412	484	412
OG0007076	AT1G05200.2	0.21923	0.14374	0.0072	0.0499	Ara1	959	1033	943
OG0005232	AT4G38360.1	0.18928	0.12222	(0.0276	0.2261)	Ara1	304	564	302
OG0013560	AT1G63940.4	0.05938	0.05908	(0.0134	0.2254)	all1	486	524	486
OG0015857	AT1G13180.1	0.03002	0.02231	(0.0020	0.0928)	all1	427	427	427
OG0011724	AT4G13260.1	0.1106	0.22173	(0.0149	0.0671)	all1	415	417	415
OG0005617	AT4G02880.1	0.51111	0.59161	0.0154	0.026	Ara1	552	571	551
OG0007453	AT4G28980.1	0.12208	0.07425	0.102566	0.015091	Ara1	479	501	480
OG0015789	AT2G02370.1	0.16182	0.19231	A:0.23789	G:0.24376	all1	320	396	320
OG0011301	AT2G23800.1	0.17769	0.07289	0.103749	0.014461	all1	376	395	367
OG0013145	AT3G28470.1	0.14273	0.37201	0.0226	0.0607	all1	317	342	311
OG0011251	AT1G53165.1	0.23143	0.09862	0.0029	0.029	all1	680	734	679
OG0013015	AT5G22330.1	0.03359	0.08452	1.91535	0.033591	all1	458	458	458
OG0005747	AT5G42630.1	0.28311	0.10548	0.0029	0.0276	Ara1	276	284	274
OG0007503	AT1G74250.1	0.22205	0.31812	G:0.40095	0.10666	Ara1	630	664	632
OG0001834	AT2G47430.1	0.37906	0.46046	0.02	0.0433	variable	1122	1167	1118
OG0018762	AT5G28590.1	0.30792	0.97017	0.0091	0.0094	Ara1	216	388	201
OG0011578	AT4G23500.1	0.1634	0.16914	0.007	0.0413	all1	495	502	494
OG0007881	AT5G15280.1	0.33326	0.50385	0.0181	0.036	Ara1	1227	1366	1222
OG0011428	AT1G03350.1	0.28593	0.08547	0.0033	0.0381	all1	470	484	439
OG0015485	AT3G11170.1	0.17775	0.25406	0.0125	0.0493	all1	446	456	442
OG0013249	AT4G04330.1	0.18344	0.82506	0.005	0.006	all1	174	247	174
OG0013319	AT1G66250.1	0.09056	0.09503	0.0049	0.0514	all1	505	516	504
OG0017791	AT1G49760.1	0.07972	0.12739	0.0052	0.0412	Ara1	671	684	662
OG0003287	AT4G33150.1	0.16062	0.14464	(0.0242	0.1656)	variable	1064	1071	1054
OG0018217	AT5G20270.1	0.17138	0.0968	0.0054	0.0562	variable	332	345	328
OG0008872	AT2G21650.1	0.14435	0.0001	0.0935)	lnL(ntime:	all1	101	174	100
OG0008922	AT4G11610.1	0.05283	0.0487	(0.0192	0.3854)	all1	1011	1015	1009
OG0018347	AT2G46535.1	0.2611	0.0001	0.052189	0.012515	Ara1	175	178	174
OG0001222	AT5G24670.1	0.28684	0.12284	0.149704	0.076406	variable	400	560	396
OG0011847	AT2G28450.1	0.27041	0.44709	0.0186	0.0416	all1	809	938	739
OG0017570	AT1G78930.1	0.19832	0.32319	0.0092	0.0284	Ara1	591	600	586
OG0015734	AT2G21150.1	0.0773	0.13668	C:0.20958	A:0.29641	all1	337	341	334
OG0011917	AT5G28290.1	0.10283	0.11703	(0.0232	0.1979)	all1	568	578	567
OG0017420	AT5G55510.1	0.32174	0.19121	A:0.23923	G:0.33971	Ara1	214	246	209
OG0015664	AT1G26100.1	0.32069	0.0001	0.155037	0.021097	all1	236	236	236
OG0003136	AT2G33130.1	0.72851	1.02657	0.0315	0.0307	Ara1	103	112	99
OG0008038	AT2G26980.3	0.10525	0.0001	0.110597	0.021666	Ara1	382	455	428
OG0008168	AT3G53010.1	0.30646	0.26226	C:0.22733	A:0.25795	Ara1	297	325	283
OG0018583	AT5G46840.1	0.18904	0.12219	A:0.26800	G:0.28600	Ara1	501	523	500
OG0015241	AT2G31320.1	0.21975	0.14474	0.2029	(0.0303	all1	983	1019	979
OG0005824	AT1G14570.1	0.15483	0.44961	0.0083	0.0184	Ara1	468	476	465
OG0003513	AT1G80650.1	0.34669	0.58397	0.0323	0.0553	Ara1	198	239	172
OG0005974	AT4G18820.1	0.08994	0.16088	0.0041	0.0252	Ara1	1097	1177	1082
OG0003443	AT2G37080.1	0.12968	0.19256	(0.0496	0.2573)	variable	583	619	580
OG0015311	AT1G23000.1	0.25247	0.41912	0.177195	0.063757	all1	358	380	345
OG0017155	AT3G26210.1	0.20353	0.29768	0.0107	0.0361	Ara1	501	501	501
OG0011799	AT1G42550.1	0.09093	0.1103	(0.0303	0.2739)	all1	843	877	830
OG0014087	AT5G24010.1	0.15682	0.37315	C:0.21776	A:0.20681	all1	824	881	822
OG0004119	AT1G43850.1	0.09286	0.096	0.0039	0.0409	Ara1	877	989	849
OG0016393	AT4G36260.1	0.14771	0.05948	0.0042	0.0714	all1	322	338	313
OG0019745	AT1G18200.1	0.1608	3.61593	0.0126	0.0035	Ara1	229	270	227
OG0009905	AT5G56550.1	0.31745	0.8651	0.0176	0.0203	all1	172	189	165
OG0009855	AT1G13270.1	0.10804	0.08876	0.1068	(0.0268	all1	369	370	369
OG0006628	AT1G55820.1	0.5064	0.45975	0.0238	0.0517	Ara1	575	1068	559
OG0012995	AT1G30510.1	0.11126	0.09901	(0.0276	0.2789)	all1	381	383	381
OG0006778	AT5G38820.1	0.16627	0.15224	(0.0345	0.2255)	Ara1	456	477	444
OG0006599	AT4G11020.1	0.38043	0.13548	0.0059	0.0433	variable	159	228	99
OG0014643	AT2G06050.1	0.10655	0.04638	0.4772)	0.0918	all1	391	392	386
OG0016407	AT3G53510.1	0.10818	0.13205	0.004	0.0305	all1	739	745	737
OG0014713	AT4G13530.2	0.23663	0.2483	0.0227	0.0914	all1	270	312	245
OG0010860	AT3G25430.1	0.19796	0.0001	0.102654	0.042963	all1	618	1081	616
OG0016172	AT1G60070.1	0.14043	0.16355	(0.0239	0.1448)	Ara1	862	899	866
OG0014336	AT5G01220.1	0.16775	0.18702	C:0.19796	A:0.28571	all1	510	545	490
OG0004953	AT5G14080.1	0.19582	0.11735	(0.0347	0.2942)	Ara1	634	700	633
OG0004803	AT2G04620.1	0.12999	0.26496	G:0.17668	position	Ara1	798	913	566
OG0016022	AT1G75510.1	0.35048	0.25569	C:0.21790	A:0.38911	all1	261	317	257
OG0014266	AT3G47450.2	0.12491	0.0647	0.045402	0.15845	all1	561	586	557
OG0019826	AT5G53320.1	0.20304	0.12044	0.0044	0.0368	variable	601	608	604
OG0009243	AT2G05940.1	0.05287	0.03573	0.4833)	0.0349	all1	462	486	451
OG0009313	AT5G07180.1	0.11819	0.07371	(0.0167	0.2238)	all1	967	1071	952
OG0006695	AT2G38690.1	0.49359	0.49091	0.0128	0.0261	variable	191	207	175
OG0012878	AT1G09630.1	0.0354	0.02814	0.0021	0.0763	all1	217	231	217
OG0012383	AT4G08390.2	0.14175	0.0001	0.121886	0.028965	all1	372	492	353
OG0010097	AT2G32300.1	0.2078	0.08313	0.0092	0.1112	all1	261	271	257
OG0012928	AT2G27510.1	0.16482	0.08605	0.0032	0.0367	all1	155	159	154
OG0004581	AT3G11440.1	0.34836	0.42127	0.0096	0.0227	Ara1	553	584	545
OG0016985	AT3G22190.1	0.17536	0.16788	0.0054	0.0321	Ara1	422	425	419
OG0002768	AT3G21320.1	0.32167	0.54092	0.0097	0.0179	Ara1	540	560	529
OG0009736	AT1G29770.1	0.29705	0.13801	0.0054	0.0388	all1	278	301	276
OG0009666	AT5G13160.1	0.03297	0.07413	0.0049	0.0659	all1	456	457	455
OG0010703	AT4G14100.1	0.21798	0.14439	0.0034	0.0234	all1	206	219	206
OG0012547	AT1G29780.1	0.31809	999	0.0053	0	all1	221	247	209
OG0004215	AT3G24740.1	0.13588	0.23036	0.0066	0.0288	Ara1	354	455	347
OG0006051	AT5G41100.1	0.26004	0.20658	0.0087	0.0423	Ara1	586	597	540
OG0004345	AT3G08990.1	0.14484	0.11045	0.0078	0.0703	Ara1	128	174	127
OG0006101	AT1G29330.1	0.10528	0.14225	0.0059	0.0415	variable	215	215	153
OG0010653	AT2G22430.1	0.08932	0.0001	0.149521	0.046642	all1	311	317	307
OG0012417	AT1G02730.1	0.05957	0.08	0.0045	0.056	all1	1181	1194	1181
OG0014920	AT4G04950.1	0.12305	0.18061	C:0.16255	A:0.27984	all1	488	488	487
OG0009487	AT5G51170.1	0.20792	0.10359	(0.0276	0.2679)	all1	285	293	288
OG0006524	AT5G08440.1	0.30263	0.32884	0.129423	0.014195	Ara1	726	787	717
OG0012032	AT3G26580.1	0.11761	0.41264	0.0159	0.0385	all1	350	354	348
OG0010276	AT3G25920.1	0.14344	0.10342	0.0053	0.0514	all1	277	282	273
OG0012162	AT1G02380.1	0.3267	1.02741	0.026	0.0253	all1	231	267	223
OG0010326	AT5G21950.1	0.16956	0.09725	0.0056	0.0579	all1	308	312	308
OG0006474	AT5G54230.1	0.20496	0.0001	0.093649	0.010514	variable	319	330	319
OG0004630	AT5G60060.1	0.35802	0.15619	A:0.33007	G:0.21895	variable	374	466	306
OG0006682	AT3G07620.1	0.14661	0.04211	0.094924	0.004821	Ara1	459	527	407
OG0012394	AT5G47060.1	0.18908	0.0001	0.138345	0.003291	all1	177	197	170
OG0014558	AT1G64890.1	0.18907	0.35312	0.011	0.031	all1	442	453	439
OG0014408	AT5G64750.1	0.21776	0.12053	0.0092	0.0759	all1	391	428	384
OG0010080	AT1G03950.1	0.09453	0.06478	(0.0138	0.2111)	all1	210	211	190
OG0004596	AT4G02860.1	0.22952	0.24419	A:0.19440	G:0.18663	Ara1	313	1439	289
OG0009254	AT5G24830.1	0.31851	0.37344	0.0125	0.0335	all1	593	594	579
OG0009304	AT3G14230.1	0.2862	0.19237	C:0.17600	A:0.29600	all1	379	439	375
OG0019961	AT5G15340.1	0.24136	0.11003	0.0034	0.0307	variable	623	624	623
OG0009721	AT1G10020.1	0.05037	0.0376	(0.0148	0.3875)	all1	461	463	460
OG0009671	AT1G80240.1	0.16526	0.07666	0.12634	0.100631	all1	370	389	369
OG0016269	AT5G62530.1	0.10647	0.06121	0.001	0.0166	all1	556	646	556
OG0009490	AT1G01550.1	0.12601	0.04015	0.0026	0.065	all1	349	349	345
OG0012550	AT4G12680.1	0.18068	0.244	(0.0444	0.1811)	all1	575	584	575
OG0014867	AT3G61450.1	0.2328	0.10305	(0.0270	0.2609)	Ara1	263	280	261
OG0010714	AT4G13560.1	0.20744	0.26889	0.0132	0.0492	all1	109	155	109
OG0006046	AT5G63490.1	0.12166	0.10087	(0.0239	0.2381)	Ara1	543	576	544
OG0004202	AT3G13850.1	0.16551	0.0001	0.102201	0.031469	variable	268	348	266
OG0006116	AT1G20310.1	0.49252	0.23203	0.0104	0.045	Ara1	240	266	229
OG0004352	AT2G43018.1	0.04838	0.20437	A:0.23265	G:0.37755	Ara1	490	490	490
OG0012400	AT2G25200.1	0.1997	0.17076	0.0166	0.0974	all1	354	379	346
OG0014937	AT1G55150.1	0.05059	0.05774	(0.0148	0.2524)	all1	501	523	495
OG0010644	AT3G14240.1	0.08055	0.10688	0.119668	0.031304	all1	775	780	774
OG0004777	AT1G07180.1	0.09775	0.11767	(0.0255	0.2170)	Ara1	510	512	508
OG0006533	AT2G02150.1	0.13943	0.19083	0.0065	0.0342	Ara1	432	1319	437
OG0010261	AT3G28917.1	0.0741	0.37599	0	0	all1	100	104	100
OG0012025	AT1G30480.1	0.11905	0.05977	0.122897	0.049733	all1	387	393	344
OG0010331	AT1G66260.1	0.27333	0.06342	0.2413)	0.147617	all1	295	371	259
OG0012175	AT2G17970.1	0.35618	0.31928	0.0128	0.04	all1	507	537	489
OG0004627	AT5G65880.1	0.44574	0.09184	0.0112	0.122	variable	62	223	59
OG0006463	AT5G17490.1	0.22197	0.06217	0.0037	0.059	Ara1	523	547	496
OG0014090	AT3G05150.1	0.22189	0.09861	(0.0261	0.2640)	all1	470	521	470
OG0010418	AT1G14810.1	0.13737	0.0001	0.115287	0.014754	all1	375	700	375
OG0016384	AT4G31510.1	0.2535	0.1336	A:0.36634	G:0.28218	all1	214	258	208
OG0012329	AT2G22650.1	0.25902	0.79884	0.002	0.0025	all1	420	476	407
OG0012982	AT3G27150.1	0.1649	0.28008	C:0.20428	A:0.28979	Ara1	422	464	421
OG0012279	AT1G77760.1	0.07194	0.07159	(0.0299	0.4150)	all1	917	923	912
OG0009912	AT3G47870.1	0.17285	0.01504	0.0013	0.0868	all1	328	485	286
OG0009842	AT1G32240.1	0.10236	0.10866	0.0044	0.0403	all1	388	417	378
OG0002106	AT5G04047.1	0.40805	0.13578	0.0169	0.1243	variable	148	153	141
OG0012098	AT3G52150.1	0.12984	0.34592	0.012	0.0347	all1	253	498	253
OG0010927	AT4G15010.1	0.12038	0.06145	0.0023	0.0376	all1	378	390	378
OG0016410	AT5G24000.1	0.2449	0.10676	0.005	0.0468	all1	443	516	436
OG0014654	AT1G34770.1	0.12091	0.37562	0.0272	0.0724	all1	237	250	236
OG0010877	AT1G48050.1	0.21598	0.4484	0.0116	0.0258	all1	680	717	680
OG0016540	AT5G59140.1	0.04785	0.0001	0.1381)	0.0776	variable	96	96	96
OG0014704	AT4G22920.1	0.14063	0.45115	0.0093	0.0207	all1	268	271	267
OG0009158	AT3G04870.2	0.07543	0.05078	0.0016	0.0321	all1	558	565	561
OG0009008	AT5G62090.1	0.16061	0.2755	0.0068	0.0247	all1	816	865	542
OG0014321	AT1G53300.1	0.14767	0.15603	0.0115	0.0739	all1	699	726	681
OG0016165	AT3G13310.1	0.10746	0.05875	(0.0211	0.3633)	all1	157	161	154
OG0004814	AT5G19960.1	0.30388	0.19837	C:0.14658	A:0.36808	Ara1	337	385	307
OG0002523	AT3G04600.1	0.14731	0.02497	0.0009	0.0342	variable	402	423	377
OG0014271	AT5G01360.1	0.09667	0.11155	0.0039	0.0354	all1	434	439	431
OG0016035	AT3G26490.1	0.21724	0.16969	(0.0576	0.3378)	variable	588	608	583
OG0017858	AT1G01080.1	0.24654	0.13694	(0.0122	0.0896)	Ara1	293	311	291
OG0005079	AT1G31480.1	0.19951	0.15296	(0.0170	0.1108)	Ara1	933	937	934
OG0007896	AT5G49890.1	0.11732	0.18335	0.004	0.0217	Ara1	779	798	775
OG0018775	AT1G54385.2	0.20069	0.09136	0.0025	0.0274	Ara1	560	602	553
OG0018625	AT1G23530.1	0.20376	0.36877	0.0075	0.0204	Ara1	189	213	187
OG0008935	AT5G24470.1	0.18449	0.30874	0.0104	0.0336	all1	558	596	558
OG0018350	AT2G21910.1	0.24278	0.10344	0.0045	0.0438	Ara1	510	522	510
OG0007748	AT1G71350.1	0.22531	999	0.0027	0	Ara1	597	1472	600
OG0015492	AT4G06599.1	0.06389	0.0001	0.0395)	lnL(ntime:	all1	340	343	336
OG0017786	AT3G29075.1	0.16749	2.09008	0	0	Ara1	294	372	279
OG0003290	AT3G27060.1	0.01729	0.00773	0.2952)	0.0249	variable	332	332	331
OG0007618	AT3G59470.1	0.05196	0.12544	(0.0155	0.1230)	Ara1	251	340	250
OG0001235	AT1G30620.1	0.05903	0.0001	0.575182	0.052441	variable	419	420	418
OG0003071	AT2G40520.1	0.64605	0.95217	0.039469	0.281293	variable	502	683	485
OG0011850	AT5G23270.1	0.24815	0.14765	A:0.29070	G:0.31783	all1	514	556	516
OG0015673	AT1G55180.1	0.16902	0.16444	A:0.32806	G:0.31884	all1	762	762	759
OG0011900	AT4G28450.1	0.13525	0.1475	0.0057	0.0387	all1	452	452	452
OG0017437	AT3G61200.1	0.4313	0.61409	0.0302	0.0493	Ara1	188	403	188
OG0003121	AT5G51190.1	0.26702	0.20509	0.0034	0.0166	variable	221	232	221
OG0017012	AT1G11545.1	0.0909	0.11092	0.0053	0.0478	Ara1	305	306	305
OG0015256	AT4G36120.1	0.29952	0.30836	(0.0684	0.2220)	all1	996	1070	963
OG0005833	AT1G73370.1	0.16514	0.06387	0.003	0.0468	Ara1	942	952	942
OG0003504	AT3G22150.1	0.14371	0.13084	A:0.24393	G:0.25243	Ara1	820	841	824
OG0005298	AT1G54830.1	0.03832	0.03809	(0.0183	0.4768)	Ara1	217	224	217
OG0017142	AT1G01230.1	0.06966	0.09701	0.0028	0.029	Ara1	157	157	157
OG0015306	AT3G01810.1	0.25188	0.28902	0.2129	(0.0615	all1	921	939	916
OG0018946	AT3G10700.1	0.15481	0.06321	0.056082	2.036	variable	424	424	419
OG0008273	AT3G19900.1	0.25111	0.26791	C:0.16667	A:0.30931	Ara1	222	254	222
OG0013918	AT5G14010.1	0.25916	1.01247	0.0321	0.0317	all1	161	175	151
OG0013848	AT3G15720.1	0.19267	0.08108	0.0027	0.0334	all1	456	775	451
OG0001069	AT4G35120.1	0.69361	1.43385	0.0807	0.0563	variable	389	461	258
OG0013796	AT2G18950.1	0.17346	0.16625	A:0.27621	G:0.27366	all1	393	397	393
OG0003608	AT3G22260.1	0.14425	0.0001	0.107769	0.006117	Ara1	240	251	240
OG0007280	AT5G02310.1	0.39048	0.86485	0.0098	0.0113	Ara1	2006	2013	1991
OG0005194	AT3G20800.1	0.06171	0.10878	0.0295	(0.0085	Ara1	316	416	316
OG0011482	AT1G66680.1	0.13845	0.02346	0.2332)	0.1271	all1	358	472	352
OG0008656	AT3G54550.1	0.3396	0.57966	0.0479	0.0826	all1	288	320	280
OG0018698	AT4G01890.1	0.3447	0.4707	0.0187	0.0397	Ara1	467	485	478
OG0008706	AT3G43230.1	0.10832	0.26776	G:0.22629	0.110508	all1	485	497	466
OG0013427	AT4G32272.1	0.14727	0.15773	A:0.29446	G:0.28863	all1	344	454	344
OG0015910	AT5G19190.1	0.18883	0.25027	C:0.25219	A:0.32456	all1	154	168	152
OG0005375	AT5G65950.1	0.30539	0.43986	0.0074	0.0169	Ara1	1190	1251	1167
OG0007131	AT1G54410.1	0.18864	0.0001	C:0.15464	A:0.41237	variable	98	103	97
OG0005225	AT2G37390.1	0.27423	0.1116	0.0072	0.0646	variable	259	283	254
OG0011733	AT5G47040.1	0.07991	0.01594	(0.0015	0.0895)	all1	888	916	888
OG0013577	AT4G02560.1	0.27322	0.34199	C:0.13468	A:0.30640	all1	953	966	898
OG0015840	AT4G20860.1	0.14401	0.18677	0.0104	0.0558	Ara1	530	554	517
OG0018479	AT4G34419.1	0.13543	0.08467	0.039031):	0.009357,	variable	129	139	128
OG0018529	AT1G67230.1	0.28605	0.4751	0.0089	0.0187	variable	1132	1166	1131
OG0007444	AT3G06660.1	0.29873	0.64828	0.0251	0.0387	Ara1	427	435	418
OG0005600	AT5G57270.1	0.08124	0.1744	0.0047	0.0267	Ara1	388	393	387
OG0013152	AT2G11520.1	0.19917	0.28735	G:0.24052	0.126341	all1	510	516	510
OG0011316	AT2G02860.1	0.1662	0.24261	G:0.20513	Average	all1	594	622	585
OG0013002	AT1G16870.1	0.17204	0.09297	(0.0217	0.2316)	all1	480	480	480
OG0011246	AT5G15450.1	0.0681	0.02319	0.086526	0.050609	all1	968	989	970
OG0005750	AT2G19120.1	0.26571	0.24953	0.0163	0.0653	variable	1090	1215	1060
OG0018885	AT5G01180.1	0.17609	0.32872	C:0.23550	A:0.26362	variable	570	592	569
OG0011034	AT5G62430.1	0.29729	0.21581	A:0.24742	G:0.24055	all1	298	314	291
OG0013270	AT1G73760.1	0.25099	0.25472	A:0.19944	G:0.22472	all1	367	391	356
OG0005522	AT2G26590.1	0.23316	0.34328	(0.0424	0.1233)	Ara1	300	316	290
OG0003815	AT5G47520.1	0.02375	1.24041	0	0	Ara1	221	322	221
OG0007766	AT5G04600.1	0.16398	0.13457	0.0072	0.0538	variable	222	286	220
OG0005472	AT2G34210.1	0.39547	0.55725	0.0205	0.0369	Ara1	989	1089	787
OG0003945	AT5G14930.2	0.55859	0.51254	0.0317	0.0618	Ara1	131	565	350
OG0007636	AT1G76360.1	0.25546	0.14542	0.0132	0.0911	Ara1	484	843	438
OG0011164	AT1G26450.1	0.42024	0.91636	0.0222	0.0242	all1	197	216	190
OG0013320	AT5G11110.1	0.15425	0.11814	0.006	0.051	all1	1047	1054	1036
OG0007213	AT1G20910.1	0.62518	0.53804	0.0246	0.0458	Ara1	398	424	378
OG0005057	AT3G32940.1	0.52438	0.08524	0.0005	0.0061	Ara1	607	670	591
OG0013705	AT1G01190.1	0.19172	0.08112	0.0029	0.0352	all1	535	541	531
OG0011541	AT1G26110.1	0.13292	0.02703	0.1771)	0.047402	all1	611	622	601
OG0015099	AT5G14530.1	0.07137	0.06056	(0.0121	0.1972)	all1	330	334	328
OG0013655	AT5G61650.1	0.32716	0.17399	(0.0570	0.3273)	all1	219	222	220
OG0011411	AT1G10760.1	0.19072	0.3171	0.012	0.0378	all1	1399	1483	1387
OG0007343	AT1G49540.1	0.14372	0.07754	0.0009	0.0119	Ara1	838	842	838
OG0005107	AT1G60900.1	0.16023	0.427	0.012	0.0281	Ara1	589	665	565
OG0008795	AT3G61840.1	0.56653	0.43692	0.0571	0.1307	all1	175	211	159
OG0015983	AT1G52150.1	0.05041	0.16217	0.0013	0.008	all1	836	872	836
OG0015278	AT3G59010.1	0.24091	0.20143	0.2369	(0.0439	all1	529	530	524
OG0015328	AT1G30200.2	0.06992	0.03767	0.3526)	0.0766	all1	379	414	378
OG0008574	AT3G57600.1	0.16022	0.08365	0.0026	0.031	all1	277	319	277
OG0008424	AT5G04460.1	0.20049	0.25486	0.2364	(0.0606	all1	863	869	852
OG0008001	AT3G15120.1	0.3726	0.32069	(0.0324	0.1008)	Ara1	1954	1993	1877
OG0008151	AT4G13250.1	0.11517	0.23427	0.0099	0.0423	Ara1	496	505	496
OG0017549	AT1G74900.1	0.13027	0.04695	0.031373	0.045083	Ara1	453	486	450
OG0005693	AT4G36945.1	0.17084	0.13201	0.008	0.0608	Ara1	408	831	387
OG0007587	AT3G13235.1	0.13725	0.08181	(0.0175	0.2153)	variable	414	505	406
OG0013091	AT2G25280.1	0.15852	0.0296	0.0008	0.028	all1	291	293	291
OG0017419	AT4G08840.1	0.36891	0.21334	C:0.20949	A:0.27866	Ara1	556	751	515
OG0007955	AT1G77600.1	0.39679	0.5844	0.0057	0.0098	Ara1	1403	1491	1269
OG0015174	AT4G28440.1	0.17687	0.04361	0.0034	0.0786	all1	153	154	152
OG0017330	AT1G26290.1	0.2896	0.24518	0.3533	(0.0708	Ara1	142	176	142
OG0015024	AT4G33030.1	0.0842	0.0001	0.100803	0.024809	all1	477	478	475
OG0007805	AT2G33550.1	0.15828	0.1696	A:0.29945	G:0.31038	Ara1	314	331	305
OG0001532	AT4G34200.1	0.11246	0.07904	(0.0121	0.1517)	variable	603	666	601
OG0003776	AT1G63260.1	0.14076	0.29173	0.0141	0.0485	variable	284	288	247
OG0008678	AT4G34370.1	0.14444	0.10295	0.005	0.0489	all1	597	624	597
OG0008728	AT4G17210.1	0.17806	0.24945	0.2053	(0.0510	all1	527	529	523
OG0018293	AT1G18870.1	0.23063	0.02322	0.0384)	0.112287	Ara1	562	577	523
OG0018968	AT2G35990.1	0.18757	0.18074	C:0.18538	A:0.25787	variable	213	213	213
OG0018838	AT5G44520.1	0.22189	0.67097	0.0227	0.0339	variable	296	300	289
OG0013936	AT4G18130.1	0.16648	0.08614	0.0066	0.0764	all1	1112	1147	1116
OG0015401	AT1G72220.1	0.43833	0.28526	0.0185	0.0648	all1	413	461	407
OG0011089	AT1G27680.1	0.10547	0.07103	0.0036	0.05	all1	518	521	508
OG0003353	AT5G05930.1	0.27692	0.14662	(0.0257	0.1745)	Ara1	274	300	273
OG0013866	AT5G54690.1	0.06532	0.08196	0.0035	0.0433	all1	535	536	535
OG0015551	AT1G04160.1	0.13019	0.21105	A:0.35023	G:0.15477	all1	1500	1547	1499
OG0018072	AT5G24020.1	0.04285	6.3134	0	0	Ara1	326	327	326
OG0011338	AT2G39980.1	0.10664	0.11507	(0.0213	0.1846)	all1	482	812	482
OG0011268	AT2G26250.1	0.04259	0.01867	0.3199)	0.0413	all1	550	596	550
OG0011993	AT5G26820.1	0.15162	0.19357	A:0.24662	G:0.31250	all1	598	607	596
OG0003597	AT3G23230.1	0.08469	0.88618	0.0033	0.0037	variable	139	147	138
OG0013409	AT3G20450.1	0.20226	0.23518	0.0095	0.0405	variable	137	138	137
OG0015395	AT1G69460.1	0.12691	0.06748	0.010508	0.020521	all1	214	223	214
OG0013559	AT3G06560.1	0.4082	0.31948	G:0.18609	0.130263	all1	507	604	489
OG0018457	AT1G66900.1	0.09967	0.10137	0.0031	0.0311	Ara1	272	286	273
OG0008499	AT2G46915.1	0.19366	0.11689	0.065842	1.73275	all1	708	792	697
OG0002751	AT4G12290.1	0.12605	0.08699	0.004	0.046	variable	741	888	735
OG0006822	AT3G21700.3	0.09558	0.01701	0.3775)	0.0494	Ara1	291	299	287
OG0016247	AT5G44460.1	0.12581	0.12291	0.0032	0.0258	all1	181	204	181
OG0014003	AT3G24430.1	0.11203	0.09472	0.004	0.0427	all1	532	589	528
OG0016317	AT2G46400.1	0.37686	0.27086	0.0127	0.0468	all1	295	353	288
OG0006972	AT1G09090.2	0.19156	0.02568	0.0007	0.0262	variable	622	872	747
OG0006289	AT1G78130.1	0.1193	0.0461	0.0015	0.0327	Ara1	490	491	488
OG0012841	AT5G60750.1	0.09745	0.0001	0.1999)	0.1206	all1	347	375	252
OG0014576	AT2G34190.1	0.06418	0.11575	0.025956	0.055439	all1	524	524	524
OG0016732	AT1G53920.1	0.17476	0.30589	G:0.20424	Average	Ara1	385	398	377
OG0012911	AT1G61080.1	0.21511	0.17289	C:0.20675	A:0.33755	all1	907	987	826
OG0014426	AT4G31810.1	0.20467	0.09744	0.0027	0.0273	all1	409	418	407
OG0016662	AT4G21070.1	0.40008	0.4747	0.0097	0.0205	variable	941	1547	929
OG0009981	AT5G37590.1	0.28001	0.53743	0.0125	0.0232	all1	555	559	502
OG0016483	ATCG00750.1	0.13628	0.0001	0.0791)-1.0000	(0.0000	variable	138	174	99
OG0002195	AT1G31660.1	0.18893	0.14603	0.0046	0.0314	variable	444	472	413
OG0004759	AT5G03800.1	0.25849	0.15572	0.0022	0.0142	Ara1	896	1465	886
OG0004609	AT5G52545.1	0.20668	0.0001	0.151342	0.012389	Ara1	79	165	79
OG0014797	AT3G49250.1	0.3813	0.42432	0.0121	0.0285	all1	420	437	409
OG0019055	AT1G05990.1	0.08521	0.0001	0.395587	0.030749	variable	150	219	150
OG0019105	AT4G38850.1	0.14401	0.04605	0.0053	0.1144	variable	89	91	89
OG0006068	AT5G47840.1	0.22871	0.13163	A:0.28319	G:0.23451	Ara1	283	575	226
OG0014849	AT5G62000.1	0.12543	0.11131	0.0043	0.0389	all1	859	919	856
OG0014919	AT1G64530.1	0.14611	0.18213	0.206	(0.0194	all1	841	881	841
OG0004887	AT4G39710.1	0.15779	0.88118	0.0094	0.0107	Ara1	217	394	216
OG0006138	AT4G15850.1	0.13173	0.131	0.013	0.0985	Ara1	522	525	474
OG0012307	AT2G30330.1	0.07987	0.16546	0.0119	0.0718	Ara1	152	152	146
OG0010143	AT2G35900.1	0.24032	0.42062	0.0231	0.0549	all1	192	194	190
OG0006611	AT2G16860.1	0.12371	0.63505	0.011	0.0173	Ara1	298	335	298
OG0004455	AT4G32780.1	0.1551	0.10994	(0.0355	0.3225)	variable	407	433	402
OG0002962	AT4G32420.1	0.30891	0.30702	(0.0528	0.1717)	Ara1	837	1125	807
OG0002832	AT5G38360.1	0.22114	0.08167	0.0049	0.0605	variable	337	970	329
OG0012257	AT5G09550.1	0.04875	0.0595	0.003	0.0501	all1	445	445	445
OG0010013	AT1G35580.1	0.0275	0.0001	0.119338	0.020479	all1	551	570	551
OG0019209	AT1G19680.1	0.55209	0.27531	G:0.24091	0.192332	Ara1	444	467	442
OG0009397	AT5G16530.1	0.21447	0.11044	0.0046	0.0418	all1	351	360	286
OG0006364	AT4G12340.1	0.28548	0.22159	A:0.35119	G:0.25794	Ara1	170	238	172
OG0010436	AT4G35280.1	0.28717	0.30857	G:0.20775	position	all1	284	304	284
OG0016901	AT4G39340.1	0.17192	0.03774	0.097830):	0.018358,	Ara1	127	133	126
OG0012672	AT3G54900.1	0.21414	0.18908	0.0133	0.0704	all1	173	190	173
OG0010566	AT1G17100.1	0.16304	0.07996	0.0085	0.1065	all1	232	232	227
OG0016851	AT3G05220.1	0.11757	0.16062	0.0126	0.0782	Ara1	577	613	450
OG0012722	AT2G45150.1	0.21411	0.92448	0.0145	0.0157	all1	430	555	391
OG0006234	AT5G19040.1	0.17852	0.01627	0.1980)	0.1888	Ara1	330	385	329
OG0009403	AT5G65140.1	0.14558	0.29943	0.1684	(0.0454	all1	370	385	369
OG0009553	AT1G75380.2	0.09297	0.19477	A:0.29938	G:0.24177	all1	325	352	324
OG0004291	AT3G46980.1	0.16908	0.09945	0.0026	0.0265	Ara1	533	556	528
OG0010787	AT1G14730.1	0.15336	0.08643	0.0043	0.0501	all1	224	310	217
OG0012493	AT3G50630.1	0.22158	0.27891	0.0577	0.207	all1	209	254	193
OG0006185	AT1G60490.1	0.08209	0.13229	0.0044	0.0335	Ara1	814	814	813
OG0010909	AT2G02560.1	0.05705	0.09331	0.03217	0.075908	all1	1219	1219	1200
OG0002078	AT1G02750.1	0.34251	0.40224	0.0274	0.0682	Ara1	221	256	212
OG0010859	AT4G37920.1	0.13762	0.11005	(0.0258	0.2326)	all1	427	656	422
OG0009176	AT5G04750.1	0.43354	0.30573	0.0089	0.029	all1	94	94	94
OG0009026	AT3G52970.1	0.17489	0.09838	(0.0325	0.3286)	all1	516	550	515
OG0009380	AT4G09960.3	0.04689	0.14758	0.056438	0.02194	all1	230	254	230
OG0010154	AT3G20050.1	0.03768	0.0125	0.0008	0.0666	all1	545	545	545
OG0012310	AT1G74460.1	0.14821	0.24918	0.0051	0.0205	all1	366	368	366
OG0016798	AT3G59640.2	0.44104	1.20678	0.0165	0.0136	Ara1	246	438	244
OG0002975	AT4G14970.1	0.14812	0.30524	0.0044	0.0144	variable	1484	1541	422
OG0006606	AT3G60840.1	0.22017	0.11275	0.2209	(0.0135	Ara1	677	750	647
OG0004512	AT4G29790.1	0.18468	0.1892	(0.0331	0.1753)	Ara1	1211	1241	1208
OG0006756	AT2G30695.1	0.34595	0.1954	C:0.15075	A:0.33166	Ara1	199	284	199
OG0010004	AT1G51130.1	0.24864	0.41875	0.0225	0.0537	all1	403	420	397
OG0012240	AT4G13830.2	0.10015	0.09216	0.0092	0.0999	all1	155	211	153
OG0006888	AT5G32450.1	0.13311	0.23789	0.0105	0.0443	Ara1	267	274	266
OG0006373	AT4G26310.1	0.22251	999	0.0041	0	Ara1	258	276	257
OG0012665	AT1G66230.1	0.15367	0.19728	0.1346	(0.0614	all1	282	298	266
OG0010421	AT1G79160.1	0.17029	0.16028	0.103393	0.04748	all1	239	266	232
OG0016916	AT2G27940.1	0.38566	0.49771	0.0549	0.1103	Ara1	237	264	230
OG0012735	AT2G02790.1	0.26994	0.26702	0.0084	0.0313	all1	636	706	582
OG0010571	AT3G47480.1	0.2781	0.25488	0.008	0.0314	all1	183	187	183
OG0006223	AT3G15550.1	0.1812	0.33404	0.093573	0.001933	Ara1	729	761	610
OG0004286	AT3G59950.1	0.23789	0.444	0.0173	0.039	Ara1	477	482	471
OG0014318	AT3G54440.1	0.19318	0.32554	0.0062	0.0191	all1	1107	1331	1107
OG0010790	AT5G41850.1	0.2673	0.26966	(0.0784	0.2905)	all1	224	238	220
OG0012484	AT1G34420.1	0.42662	0.35729	0.0166	0.0465	all1	966	973	953
OG0014248	AT4G26640.1	0.20195	0.46943	0.0081	0.0173	all1	485	565	556
OG0006192	AT5G64830.1	0.2363	0.73384	0.0127	0.0173	Ara1	380	386	372
OG0009414	AT1G69870.1	0.16313	0.17473	(0.0427	0.2425)	all1	620	1169	598
OG0009544	AT4G15570.1	0.12696	0.07834	0.0028	0.0358	variable	818	818	818
OG0009161	AT2G21100.1	0.19497	0.05584	0.099353	0.047174	all1	187	347	187
OG0009031	AT1G75125.1	0.25104	0.66172	0.026	0.0393	Ara1	105	111	105
OG0016429	AT3G45280.1	0.17058	0.12449	0.0096	0.0773	variable	267	268	263
OG0000880	AT3G05450.1	0.66366	0.34989	C:0.22222	A:0.22222	variable	440	533	96
OG0016579	AT5G01390.1	0.14056	0.48296	0.0182	0.0377	Ara1	335	342	330
OG0006835	AT4G32140.1	0.11364	0.12947	0.0079	0.0614	Ara1	394	496	393
OG0014014	AT4G10380.1	0.21222	0.0001	0.143681	0.011826	all1	304	310	300
OG0016250	AT5G05340.1	0.13433	0.05177	0.073163	0.023821	all1	324	534	324
OG0012788	AT1G71190.1	0.20961	0.02162	0.002	0.0933	all1	281	322	281
OG0014144	AT2G40420.1	0.13889	0.11673	0.0072	0.0618	all1	440	447	438
OG0016300	AT2G17705.1	0.1081	0.3728	0.168	(0.0366	all1	127	127	127
OG0006965	AT3G47960.1	0.18714	0.32096	G:0.30351	position	variable	636	661	626
OG0009718	AT1G77230.1	0.35436	0.26445	0.0034	0.0129	all1	218	221	192
OG0009648	AT4G21960.1	0.03816	0.08026	0.0036	0.0449	all1	330	330	330
OG0009996	AT3G49880.1	0.09936	0.1599	0.0092	0.0575	all1	466	476	466
OG0019808	AT4G19890.1	0.14343	0.08401	0.0029	0.0349	variable	701	728	700
OG0019958	AT5G10810.1	0.08532	0.31634	0.0108	0.0341	variable	109	128	108
OG0016725	AT5G54800.1	0.10283	0.11365	(0.0210	0.1853)	Ara1	388	408	385
OG0012856	AT3G13360.1	0.36263	0.51459	0.0236	0.0458	all1	459	531	442
OG0014561	AT1G79040.1	0.12378	1.04071	0	0	all1	140	140	140
OG0002233	AT1G61350.1	0.09366	0.02989	0.3013)	0.1151	variable	573	573	572
OG0016675	AT4G29240.1	0.18377	0.36239	0.0086	0.0238	Ara1	415	444	406
OG0012906	AT3G03950.3	0.19849	0.06809	0.002	0.0295	all1	425	433	428
OG0014431	AT1G03150.1	0.09159	0.0001	0.1000)-1.0000	(0.0000	all1	174	323	174
OG0019042	AT5G46115.1	0.50133	0.42952	0.4533	1.0553	variable	74	133	87
OG0019112	AT4G32750.1	0.12676	0.05308	0.0015	0.0288	variable	293	300	292
OG0010258	AT1G61600.1	0.16475	999	0.0052	0	all1	421	433	414
OG0016494	AT2G48120.1	0.25332	0.11703	0.0096	0.0819	variable	313	360	309
OG0014780	AT1G67490.1	0.18588	0.18813	0.0054	0.0289	all1	852	896	845
OG0010308	AT2G18230.1	0.10747	0.02763	(0.0060	0.2070)	all1	218	248	218
OG0012569	AT1G27310.1	0.02038	999	0.0035	0	all1	122	122	122
OG0012439	AT1G27000.1	0.31016	0.28308	0.0113	0.0399	all1	304	844	298
OG0004890	AT1G79690.1	0.15546	0.18611	A:0.28368	G:0.33549	Ara1	772	795	772
OG0003631	AT5G58190.1	0.30502	0.25487	C:0.21289	A:0.29557	variable	527	564	515
OG0007942	AT1G17130.2	0.18634	0.15309	C:0.15674	A:0.36050	Ara1	331	366	321
OG0017327	AT4G17680.1	0.40608	0.77477	0.0244	0.0315	Ara1	314	365	275
OG0015163	AT2G01820.1	0.20516	0.24006	(0.0791	0.3289)	all1	943	950	944
OG0017277	AT1G79850.1	0.19546	0.27381	(0.0290	0.1057)	Ara1	149	155	144
OG0015033	AT1G51355.1	0.33342	999	0.0042	0	all1	116	131	114
OG0007812	AT3G07170.1	0.25605	0.74135	0.0072	0.0097	Ara1	203	217	181
OG0013921	AT5G15680.1	0.04718	0.11114	0.0012	0.011	all1	2153	2173	2153
OG0017652	AT5G59450.1	0.16878	0.25175	0.0094	0.0375	Ara1	610	632	609
OG0005588	AT3G54140.1	0.08119	0.10042	0.0043	0.0426	Ara1	570	605	570
OG0003344	AT3G21640.1	0.12895	0.18183	A:0.27473	G:0.37363	Ara1	365	431	364
OG0013871	AT4G24175.1	0.29051	0.58553	0.01	0.0171	Ara1	306	308	305
OG0015546	AT4G26890.1	0.38781	0.17094	0.188667	0.044554	all1	444	464	409
OG0017702	AT4G16650.1	0.13108	0.09544	0.0046	0.0484	Ara1	549	552	549
OG0018284	AT1G78550.1	0.26272	0.25153	(0.0506	0.2015)	Ara1	356	357	354
OG0005639	AT5G65180.1	0.1918	0.16413	(0.0483	0.2934)	Ara1	439	603	435
OG0005769	AT1G73730.1	0.14507	0.05385	0.0037	0.0694	Ara1	567	622	564
OG0011984	AT5G11060.1	0.09805	0.08879	0.0066	0.0745	Ara1	393	429	387
OG0018135	AT3G05990.1	0.16972	0.19161	(0.0574	0.2995)	variable	517	535	514
OG0018065	AT1G09600.1	0.26102	0.21213	(0.0591	0.2785)	variable	714	725	690
OG0018510	AT3G53820.1	0.29408	0.44917	(0.0703	0.1565)	Ara1	142	147	140
OG0003580	AT5G56090.1	0.10555	0.10517	(0.0284	0.2691)	variable	457	515	457
OG0007108	AT1G08830.1	0.12206	0.3123	0.0086	0.0275	Ara1	152	152	152
OG0015929	AT4G20440.3	0.05391	0.02157	(0.0053	0.2408)	all1	257	282	256
OG0015879	AT2G46710.1	0.1503	0.1797	C:0.20354	A:0.29204	all1	455	463	452
OG0015382	AT3G56891.1	0.17158	0.60662	0.0052	0.0086	all1	166	178	165
OG0007058	AT4G10170.1	0.14492	0.19535	0.0077	0.0396	Ara1	254	497	252
OG0013267	AT3G59390.2	0.23821	0.21272	A:0.25490	G:0.24020	all1	273	280	272
OG0011023	AT1G27290.2	0.08806	0.06748	0.035431	0.201045	all1	142	212	139
OG0007771	AT3G16780.1	0.10203	0.066	0.005	0.0761	Ara1	209	211	209
OG0005535	AT2G36560.1	1.14168	1.10662	0.0897	0.0811	variable	574	600	190
OG0003802	AT2G43150.1	0.04359	0.27863	C:0.47642	A:0.11321	Ara1	212	1233	212
OG0007621	AT5G64580.1	0.07815	0.00247	0.0001	0.0315	variable	855	856	855
OG0005465	AT2G38240.1	0.24203	0.29177	0.0176	0.0603	variable	353	353	352
OG0003952	AT5G58300.1	0.18371	0.36747	0.0059	0.0161	Ara1	654	684	650
OG0013337	AT2G20000.1	0.14644	0.31449	0.0035	0.0111	all1	744	750	745
OG0011173	AT1G08700.1	0.15335	0.22982	0.1756	(0.0383	all1	453	470	444
OG0018369	AT1G27470.1	0.20913	0.17698	0.0054	0.0303	variable	810	812	803
OG0018892	AT4G37720.1	0.52011	0.44272	0.0159	0.0359	variable	87	88	87
OG0005040	AT4G30140.1	0.44358	0.61941	0.0135	0.0218	Ara1	348	359	346
OG0007204	AT2G26150.1	0.08181	0.03738	0.0025	0.0673	Ara1	345	375	342
OG0011556	AT3G22300.1	0.24175	0.43248	0.0264	0.061	all1	241	299	240
OG0013712	AT2G13350.1	0.15232	0.1044	0.005	0.0477	all1	401	404	401
OG0011406	AT4G20420.1	0.4289	0.21177	0.0101	0.0475	variable	142	148	139
OG0017931	AT4G30850.2	0.12963	0.07278	0.0033	0.0458	Ara1	358	361	360
OG0013642	AT4G26600.1	0.25191	0.44146	0.0152	0.0344	all1	671	704	629
OG0005110	AT3G62120.1	0.08728	0.34233	0.0146	0.0426	variable	530	587	517
OG0007354	AT3G58030.2	0.05703	0.07295	(0.0151	0.2056)	Ara1	436	440	437
OG0008433	AT5G04610.1	0.29265	0.41652	0.0146	0.0351	variable	434	448	433
OG0001779	AT5G39970.1	0.26109	0.369	0.0142	0.0384	Ara1	690	1153	678
OG0015994	AT5G66130.1	0.24574	0.15172	0.0141	0.0929	all1	599	685	583
OG0011392	AT3G61250.1	0.18237	0.28928	Average	T:0.26871	all1	299	301	294
OG0011869	AT3G16010.1	0.09526	0.02979	0.3733)	0.0803	all1	642	645	638
OG0005684	AT3G49940.1	0.12964	0.04249	0.0032	0.0755	Ara1	247	248	235
OG0003048	AT1G66520.1	0.16257	0.39288	0.0117	0.0297	variable	355	741	355
OG0007590	AT5G03970.1	0.35542	51.6398	0.0117	0.0002	Ara1	418	834	413
OG0011939	AT3G01820.1	0.29246	0.17433	0.15987	0.005559	all1	263	447	265
OG0013086	AT4G28100.1	0.12854	0.08893	0.0068	0.0768	all1	304	313	299
OG0008016	AT1G14685.1	0.03617	0.09164	0.0078	0.085	Ara1	279	341	273
OG0018188	AT1G53120.1	0.19934	0.13309	0.0079	0.0591	variable	320	377	320
OG0008146	AT1G15060.1	0.20541	0.09425	0.0035	0.0371	Ara1	578	704	573
OG0007427	AT3G03980.1	0.14486	0.14371	C:0.15926	A:0.27407	Ara1	270	283	270
OG0005663	AT1G08290.1	0.23857	0.46278	0.0094	0.0204	Ara1	337	349	333
OG0013131	AT1G13690.1	0.05782	0.09438	0.0103	0.1086	all1	177	178	177
OG0011375	AT3G10390.1	0.09389	0.13521	0.0056	0.0416	all1	884	1332	800
OG0013061	AT5G42560.3	0.20015	2.15184	0.012	0.0056	all1	296	511	277
OG0011225	AT4G33250.1	0.17028	0.35651	0.0044	0.0123	all1	226	238	228
OG0007577	AT3G07760.1	0.1028	0.11069	0.0071	0.064	Ara1	125	140	125
OG0001840	AT1G77180.1	0.09573	0.17706	A:0.33005	G:0.36125	variable	613	1102	609
OG0005733	AT3G16090.1	0.17542	0.02461	0.038585):	0.048970):	Ara1	492	645	501
OG0015288	AT5G23280.1	0.07926	0.02366	0.1625)	0.0647	all1	250	470	230
OG0011600	AT2G31800.1	0.08581	0.06944	0.0026	0.0371	Ara1	476	493	475
OG0013444	AT5G43780.1	0.10256	0.16597	(0.0159	0.0952)	all1	469	474	464
OG0015973	AT4G33550.2	0.27376	0.20415	0.1156	(0.0471	all1	130	132	115
OG0007152	AT2G33610.1	0.25164	0.27006	C:0.20202	A:0.27706	Ara1	469	472	462
OG0005246	AT4G15520.1	0.0935	0.0001	0.079807	0.018219	Ara1	222	222	219
OG0007002	AT4G29540.2	0.20522	0.19034	A:0.28999	G:0.31922	Ara1	334	352	334
OG0011750	AT3G53770.1	0.60289	0.0001	0.021548	0.006633	Ara1	124	126	120
OG0013514	AT1G12850.1	0.16535	0.2656	G:0.21671	Average	all1	405	624	393
OG0015823	AT1G03900.1	0.05934	0.17743	0.0009	0.0054	variable	272	279	277
OG0008584	AT3G06035.1	0.31213	1.05966	0.0245	0.0231	all1	200	210	199
OG0015139	AT5G62065.1	0.21115	1.61451	0	0	all1	120	293	118
OG0007918	AT3G54800.1	0.13829	0.21763	C:0.19337	A:0.27486	Ara1	733	744	726
OG0007848	AT5G61610.1	0.48807	0.74315	0.038	0.0512	Ara1	294	316	144
OG0015069	AT2G44080.1	0.18041	0.08577	0.0034	0.0393	Ara1	135	147	128
OG0008635	AT3G23360.1	0.29722	0.2186	0.0075	0.0345	all1	260	672	258
OG0018925	AT1G52330.1	0.30677	0.29866	0.0091	0.0304	variable	214	256	213
OG0008340	AT5G44720.1	0.13775	0.40638	0.0042	0.0104	variable	308	309	308
OG0008210	AT5G54280.1	0.13042	0.10924	0.0055	0.0499	Ara1	1030	1244	1212
OG0018875	AT3G19400.1	0.25809	0.00317	0.0001	0.0399	variable	362	418	351
OG0007796	AT1G72740.1	0.49665	1.15878	0.0438	0.0378	Ara1	287	366	283
OG0013280	AT3G04260.1	0.13295	0.10738	(0.0120	0.1119)	all1	910	922	910
OG0017758	AT5G07880.1	0.26024	0.33663	G:0.32911	position	Ara1	251	353	237
OG0011194	AT1G72340.1	0.10396	0.06971	0.039298	0.043668	all1	382	385	381
OG0005482	AT2G39450.1	0.08922	0.04321	0.024553	0.096495	variable	394	395	394
OG0015235	AT5G52430.1	0.11481	0.0001	0.153857	0.045324	all1	438	448	433
OG0005850	AT3G06080.1	0.20248	0.31384	G:0.22414	position	Ara1	346	479	464
OG0003567	AT3G46200.1	0.23423	0.2186	(0.0543	0.2470)	variable	311	948	295
OG0005900	AT4G03030.1	0.15068	0.11273	0.0098	0.087	Ara1	442	456	436
OG0003437	AT2G23200.1	0.36507	0.44762	0.359	(0.1536	Ara1	834	1665	825
OG0017121	AT4G30700.1	0.19604	0.10739	0.0042	0.0394	Ara1	792	792	792
OG0015365	AT3G20970.1	0.20962	0.14794	A:0.25000	G:0.23106	all1	283	292	264
OG0008539	AT3G01600.1	0.19056	0.15052	C:0.19318	A:0.29830	all1	366	405	352
OG0008469	AT3G06960.1	0.30498	0.59226	0.017	0.0288	all1	479	490	479
OG0003012	AT5G40820.1	0.25454	0.20268	A:0.27656	G:0.22585	variable	2702	3201	2695
OG0015740	AT1G15130.1	0.13784	0.21068	0.103658	0.037625	all1	846	995	846
OG0011833	AT2G35300.1	0.11073	0.06963	0.007	0.1002	all1	97	102	97
OG0017504	AT1G27730.1	0.07818	0.58271	0.019	0.0326	Ara1	227	245	226
OG0015610	AT3G10800.1	0.21572	0.1359	0.0073	0.0535	all1	675	692	664
OG0011963	AT2G30370.1	0.07647	0.0001	0.123484	0.005647	all1	230	255	81
OG0017454	AT5G67440.1	0.15155	0.59507	0.004	0.0068	variable	579	601	579
OG0011298	AT1G19350.4	0.06589	0.14685	0.0151	0.1029	Ara1	335	336	331
OG0018998	AT5G14410.1	0.20939	0.42795	0.0174	0.0407	variable	133	156	131
OG0018263	AT3G04430.1	0.33135	0.28617	0.3173	(0.1427	Ara1	198	318	194
OG0008806	AT5G46860.1	0.07554	0.26257	0.0077	0.0293	all1	268	269	268
OG0008956	AT5G46280.1	0.16257	0.24311	0.1677	(0.0432	all1	776	780	772
OG0003858	AT1G28490.1	0.05072	0.33373	0.0053	0.016	Ara1	245	259	245
OG0011079	AT1G08070.1	0.24075	0.28793	C:0.19024	A:0.29630	all1	741	1049	639
OG0013896	AT1G68480.1	0.30245	0.17547	C:0.36667	A:0.22500	all1	253	319	184
OG0011129	AT2G20635.1	0.31489	0.39535	0.0064	0.0161	all1	525	557	524
OG0003908	AT5G38050.1	0.19698	0.2065	C:0.27586	A:0.39655	Ara1	281	797	231
OG0015184	AT3G45230.1	0.37006	0.22833	C:0.22222	A:0.20988	all1	175	204	162
OG0013748	AT3G20930.1	0.25257	0.09769	0.0041	0.0418	all1	374	395	370
OG0003786	AT3G14170.1	0.3029	0.35905	0.0116	0.0323	Ara1	505	532	501
OG0013618	AT5G42490.1	0.30109	0.58908	0.0152	0.0258	all1	1087	1355	993
OG0017290	AT3G22790.1	0.19852	0.27288	C:0.16797	A:0.41752	variable	1728	1802	1719
OG0008688	AT5G57120.1	0.42259	0.58304	0.0431	0.074	all1	330	414	291
OG0018716	AT3G45870.1	0.16372	0.08365	0.1353	(0.0415	Ara1	385	468	385
OG0018646	AT3G52910.1	0.14029	0.0626	0.0019	0.0305	Ara1	380	628	372
OG0014342	AT1G51350.1	0.17934	0.20458	A:0.25225	G:0.32883	all1	666	713	666
OG0016106	AT1G08410.1	0.15515	0.17433	A:0.25214	G:0.25214	all1	589	594	583
OG0004927	AT4G28710.1	0.22325	0.25311	0.0123	0.0485	Ara1	1516	1575	1501
OG0006098	AT4G10925.1	0.08321	0.01841	0.3750)	0.0722	Ara1	231	302	225
OG0004877	AT5G19000.1	0.11553	0.11718	(0.0459	0.3916)	Ara1	407	452	405
OG0002540	AT5G28900.1	0.1161	0.06441	0.0035	0.0548	Ara1	536	552	536
OG0014212	AT1G78090.1	0.23912	0.18199	(0.0377	0.2065)	all1	374	381	366
OG0016056	AT1G18890.1	0.09158	0.079	0.0041	0.0521	all1	545	546	542
OG0010944	AT3G19490.1	0.11176	0.11716	(0.0251	0.2126)	all1	576	583	571
OG0016473	AT1G27300.1	0.36393	0.39148	0.0173	0.0442	variable	200	208	198
OG0014637	AT4G37540.1	0.254	1.18405	0.0098	0.0083	all1	240	244	237
OG0010814	AT3G02150.2	0.27606	0.21988	0.2796	(0.0688	all1	278	425	341
OG0016523	AT5G50170.1	0.17144	0.16186	(0.0576	0.3577)	variable	1027	1039	1013
OG0014767	AT1G15240.1	0.25676	0.09556	0.11853	0.030534	all1	706	1024	942
OG0004418	AT2G41060.1	0.26822	0.29254	0.0152	0.0518	Ara1	451	501	432
OG0014586	AT4G04980.1	0.23427	0.29389	0.0093	0.0318	all1	880	919	816
OG0009971	AT3G10710.1	0.15397	0.1193	0.0068	0.0568	all1	561	562	560
OG0009821	AT3G57060.1	0.16734	0.08527	(0.0171	0.2012)	all1	1396	1503	1339
OG0006329	AT5G48130.1	0.23307	0.11643	0.0069	0.0592	Ara1	625	734	622
OG0006279	AT1G03270.1	0.17401	0.02591	0.2486)	0.1499	Ara1	499	567	464
OG0006982	AT5G51130.1	0.15431	0.04585	0.2750)	0.1742	Ara1	318	391	308
OG0004714	AT1G13190.1	0.14715	0.1405	0.0026	0.0186	Ara1	573	599	572
OG0006550	AT2G22600.1	0.31892	0.24488	0.0112	0.0458	Ara1	632	658	623
OG0010202	AT2G45880.1	0.13831	0.35612	0.081211	0.020692	all1	691	751	685
OG0012046	AT5G35080.1	0.26346	1.68798	0.0082	0.0049	all1	282	310	281
OG0010352	AT5G53650.1	0.10602	0.75909	0.013	0.0172	all1	72	72	72
OG0012116	AT5G66500.1	0.22994	0.29475	G:0.34211	Average	all1	532	799	532
OG0004644	AT5G17230.1	0.07779	0.11789	(0.0313	0.2631)	Ara1	422	430	412
OG0006400	AT1G76620.1	0.21393	0.14089	0.2285	(0.0320	Ara1	527	551	480
OG0019018	AT5G07960.1	0.05695	0.0001	0.2327)	0.0352	variable	107	107	107
OG0009186	AT4G33770.1	0.2182	0.44446	0.0157	0.0354	all1	391	416	386
OG0014804	AT4G17260.1	0.09547	0.18381	0.0054	0.0292	all1	353	353	353
OG0010777	AT3G63300.1	0.11938	0.12997	0.0078	0.0597	all1	498	532	497
OG0006025	AT1G76490.1	0.07714	0.03332	0.4521)	0.0636	Ara1	642	665	584
OG0004261	AT3G17010.1	0.50889	1.18482	C:0.13469	A:0.39592	variable	302	379	297
OG0006175	AT5G11730.1	0.15474	0.7272	0.0132	0.0182	Ara1	386	387	386
OG0004331	AT1G01450.1	0.19274	0.16157	(0.0374	0.2317)	Ara1	470	993	437
OG0012463	AT1G61590.1	0.09475	0.02694	0.06337	0.357784	all1	424	427	424
OG0014954	AT5G03730.1	0.08261	0.03457	0.02128	0.070849	all1	821	848	607
OG0010627	AT5G57490.1	0.17841	0.22798	0.0051	0.0222	all1	274	274	274
OG0009742	AT2G18500.1	0.24932	0.21205	0.0093	0.0439	all1	315	335	308
OG0009612	AT2G45420.1	0.1415	0.18056	0.009	0.0501	all1	262	314	252
OG0012682	AT5G56280.1	0.10892	0.0407	0.022651	0.154909	all1	317	361	317
OG0006394	AT1G09770.1	0.11222	0.14306	0.0089	0.0624	Ara1	844	849	844
OG0010596	AT1G73960.1	0.19301	0.20722	0.0094	0.0452	all1	1390	1421	1387
OG0002269	AT1G50900.1	0.13582	0.21058	0.0141	0.0668	Ara1	175	179	175
OG0019852	AT1G03700.1	0.05925	0.07278	0.062256	0.071307	variable	164	164	164
OG0009237	AT4G02800.1	0.20625	0.31641	0.0155	0.049	all1	333	357	328
OG0009367	AT1G67340.1	0.11935	0.05035	0.005	0.1001	all1	379	385	373
OG0019902	AT4G28730.1	0.3352	0.22397	0.2658	(0.0844	variable	174	185	172
OG0009191	AT1G74100.1	0.06742	0.04322	0.0032	0.075	all1	338	405	337
OG0006547	AT2G25220.1	0.1286	0.11037	0.0054	0.0491	Ara1	432	464	383
OG0000870	AT1G72290.1	0.72714	0.26769	C:0.32683	A:0.22439	variable	215	639	207
OG0004703	AT5G59950.1	0.12011	0.11781	(0.0300	0.2545)	Ara1	244	262	243
OG0012051	AT4G00220.1	0.21171	0.19534	(0.0746	0.3819)	all1	228	232	226
OG0010215	AT1G74970.1	0.06934	0.00533	0.0003	0.0618	all1	208	374	208
OG0012101	AT5G59200.1	0.24181	0.09721	0.0032	0.0333	Ara1	544	986	544
OG0010345	AT3G05970.1	0.09164	0.09824	0.0045	0.0457	all1	701	741	685
OG0016589	AT1G49170.1	0.18294	0.30646	0.0328	0.1069	Ara1	126	129	126
OG0006417	AT1G75690.1	0.08704	0.15941	0.098823	0.008635	Ara1	154	156	154
OG0004653	AT3G27325.1	0.20637	0.3513	0.0049	0.0139	Ara1	1085	1193	1083
OG0010760	AT4G34490.1	0.08921	0.04515	0.0014	0.0303	all1	476	488	470
OG0012524	AT1G61520.1	0.10435	0.19026	0.102436	0.021546	all1	273	273	273
OG0014813	AT5G42310.1	0.07453	0.03708	0.4857)	0.0698	all1	709	727	701
OG0004276	AT5G15180.1	0.27727	0.48512	0.0076	0.0157	variable	329	329	329
OG0006032	AT4G08920.1	0.04673	0.30352	0.0033	0.011	Ara1	681	726	680
OG0004326	AT1G61850.1	0.11403	0.10211	0.0032	0.0311	Ara1	1223	1362	1255
OG0006162	AT3G59940.1	0.16411	0.24704	0.0113	0.0456	variable	418	433	414
OG0010630	AT5G24810.1	0.17072	0.34142	0.0108	0.0315	all1	1009	1017	1011
OG0012474	AT1G07430.1	0.17505	0.02025	0.0011	0.0557	all1	442	475	427
OG0014943	AT5G62270.1	0.17039	0.1461	A:0.19582	G:0.27415	all1	383	806	383
OG0012695	AT4G33540.1	0.2768	0.36631	0.0089	0.0242	all1	355	356	349
OG0014059	AT5G52630.1	0.11988	0.0001	0.074477	0.014478	all1	588	596	588
OG0006383	AT3G60660.1	0.15431	0.10366	(0.0370	0.3558)	Ara1	272	272	272
OG0006878	AT1G52380.1	0.22838	0.12458	A:0.31202	G:0.41176	Ara1	440	445	411
OG0006928	AT5G08360.1	0.73219	1.09985	0.0784	0.0713	variable	186	330	229
OG0014109	AT4G22730.1	0.15581	0.4913	0.0097	0.0198	all1	688	694	686
OG0010581	AT3G44680.1	0.02748	0.0001	0.106772	0.02623	variable	426	446	426
OG0009755	AT4G15248.1	0.44499	0.14765	0.3751)	0.4804	all1	117	145	116
OG0009605	AT5G09330.2	0.27487	0.57416	0.0225	0.0392	all1	489	541	382
OG0019845	AT5G44973.1	0.51321	0.26551	C:0.19277	A:0.26506	variable	102	146	83
OG0009220	AT4G32810.1	0.14994	0.28661	0.0051	0.0178	all1	570	577	562
OG0009370	AT5G23330.1	0.33765	0.90313	0.0129	0.0143	all1	354	365	351
OG0019915	AT5G49980.1	0.07435	0.04905	0.0041	0.0845	variable	619	639	612
OG0002985	AT1G58230.1	0.14492	0.08016	0.0026	0.032	variable	2604	2626	2547
OG0012599	AT1G58350.1	0.12935	0.1974	0.0082	0.0414	all1	794	801	787
OG0016111	AT3G07570.1	0.2739	0.38531	0.0181	0.0471	all1	369	656	363
OG0014355	AT1G80460.1	0.07261	0.06253	(0.0126	0.1976)	all1	522	523	522
OG0004930	AT2G19940.1	0.16363	0.08996	0.0045	0.05	Ara1	389	421	382
OG0004860	AT5G60760.1	0.11534	0.13705	(0.0423	0.3073)	Ara1	738	767	732
OG0016041	AT5G11310.1	0.20791	0.16566	A:0.25461	G:0.26298	all1	602	610	598
OG0014205	AT4G16580.1	0.15461	0.14518	0.0078	0.0539	all1	467	477	469
OG0009459	AT1G05850.1	0.08259	0.10988	(0.0243	0.2198)	all1	321	321	321
OG0009509	AT1G49270.1	0.20883	0.16657	0.0113	0.0677	all1	699	756	687
OG0014620	AT2G06025.1	0.15279	0.04761	0.3124)	0.1637	all1	288	823	286
OG0010953	AT4G39040.1	0.27015	0.30092	0.0063	0.0209	all1	296	305	273
OG0016464	AT5G09980.1	0.47005	0.11876	0.063735	0.171307	variable	81	111	76
OG0014770	AT2G42005.1	0.14615	0.17909	0.0097	0.0543	all1	413	607	410
OG0010803	AT5G42980.1	0.35465	999	0.0378	0	all1	118	146	117
OG0016534	AT3G23240.1	0.1447	0.46772	0.0174	0.0372	variable	218	238	215
OG0009966	AT3G20000.1	0.09528	0.29155	C:0.23377	A:0.32468	all1	309	481	308
OG0009836	AT2G04400.1	0.19559	0.15083	A:0.27612	G:0.23632	all1	402	437	402
OG0000087	AT2G07190.1	0.33012	3.8159	0	0	variable	452	892	217
OG0002938	AT3G16320.1	0.37256	0.58075	0.0169	0.029	variable	728	734	713
OG0014591	AT1G21722.1	0.29468	999	0.0063	0	all1	233	254	210
OG0010119	AT5G21930.1	0.18249	0.11775	0.0056	0.0476	all1	883	890	886
OG0010049	AT4G14680.1	0.08831	0.0192	0.2837)	0.0816	all1	465	486	465
OG0012628	AT5G62540.1	0.11484	0.05622	(0.0173	0.3084)	all1	150	150	150
OG0006995	AT1G64710.1	0.19447	0.19072	(0.0416	0.2178)	variable	380	409	380
OG0012778	AT5G03860.1	0.07429	0.17217	0.0053	0.0306	all1	562	562	562
OG0019676	AT1G49450.1	0.13944	0.06564	0.009	0.1364	variable	471	476	466
OG0015222	AT1G29220.1	0.16437	0.27858	G:0.24419	position	all1	351	388	344
OG0017066	AT5G58150.1	0.35324	0.34728	0.0138	0.0398	variable	785	813	785
OG0005847	AT2G20340.1	0.16761	0.09644	0.0039	0.0408	Ara1	490	506	478
OG0003570	AT3G17880.1	0.27763	0.18457	A:0.29178	G:0.37666	Ara1	380	390	377
OG0005917	AT3G45050.4	0.34907	0.0001	0.061806	0.017101	Ara1	130	164	157
OG0003420	AT5G53900.2	0.10954	0.09579	(0.0288	0.2982)	Ara1	265	494	264
OG0015372	AT1G30450.1	0.06963	0.06502	0.0028	0.0433	all1	975	1044	973
OG0017136	AT3G51890.1	0.26565	0.69671	0.0179	0.0257	Ara1	258	274	254
OG0015889	AT3G62630.1	0.15673	0.1248	(0.0372	0.2990)	all1	380	494	380
OG0011824	AT3G66658.2	0.06382	0.05317	(0.0111	0.2091)	all1	554	657	594
OG0017513	AT1G69810.1	0.33835	0.28201	A:0.37995	G:0.12929	Ara1	387	400	379
OG0015757	AT3G63090.1	0.15346	0.11344	(0.0506	0.4450)	all1	404	476	400
OG0011974	AT2G24790.1	0.23471	0.11801	0.0097	0.0821	all1	294	320	286
OG0017443	AT4G21860.1	0.227	0.271	C:0.27441	A:0.23737	Ara1	202	224	198
OG0015607	AT5G55690.1	0.34066	1.01974	0.0171	0.0168	all1	277	518	256
OG0005799	AT4G15730.1	0.64805	0.45955	0.0184	0.04	Ara1	1059	1236	1013
OG0005578	AT2G01390.1	0.22025	0.23678	Average	T:0.27493	Ara1	577	805	565
OG0013881	AT2G06200.1	0.15854	0.16049	A:0.30435	G:0.17826	all1	244	288	230
OG0005428	AT1G71430.1	0.44104	0.27448	0.0348	0.1266	Ara1	164	177	161
OG0018274	AT3G63520.1	0.15937	0.14072	(0.0183	0.1310)	Ara1	538	607	534
OG0008811	AT1G16690.1	0.27518	0.23969	A:0.33105	G:0.16667	all1	439	681	438
OG0008941	AT5G46100.1	0.10549	0.2164	G:0.25536	position	all1	472	472	466
OG0018324	AT1G29640.1	0.1723	0.23888	0.0092	0.0384	Ara1	140	152	136
OG0018701	AT1G52800.1	0.2529	0.09279	0.067483	0.118973	variable	314	335	312
OG0018651	AT1G79770.1	0.19799	0.05882	0.020562	0.093743	variable	167	178	171
OG0015193	AT2G30860.1	0.10489	0.44664	0.0081	0.0182	all1	215	224	201
OG0007249	AT2G32810.1	0.1989	0.10712	0.0041	0.0383	Ara1	887	903	886
OG0003791	AT1G27595.1	0.25636	0.33035	0.0083	0.025	variable	1325	1441	1265
OG0007319	AT5G42540.1	0.48765	0.84543	0.0209	0.0247	Ara1	1012	1329	982
OG0005674	AT1G61415.1	0.26741	46.4496	0	0	Ara1	167	240	167
OG0007430	AT1G69420.1	0.10196	0.13353	0.004	0.03	Ara1	596	610	594
OG0011899	AT1G66820.1	0.32479	0.65355	0.0165	0.0252	Ara1	109	131	107
OG0011362	AT3G19820.2	0.07349	0.07582	0.0029	0.0382	all1	561	571	561
OG0013126	AT1G04960.1	0.17581	0.47737	0.0072	0.015	all1	317	322	316
OG0011232	AT1G03055.1	0.40885	0.38149	0.0125	0.0329	all1	264	272	263
OG0013076	AT5G27420.1	0.25588	0.28897	C:0.15847	A:0.23497	all1	368	393	368
OG0005724	AT1G25280.1	0.06104	0.17289	0.0055	0.0316	variable	445	452	442
OG0007560	AT3G01080.1	0.13877	0.23632	A:0.28032	G:0.24337	Ara1	423	491	415
OG0018178	AT2G04410.1	0.21	0.2069	0.021	0.1016	variable	73	94	73
OG0018028	AT1G21695.1	0.43524	0.18563	0.0073	0.0391	Ara1	217	249	196
OG0008593	AT1G60000.1	0.19047	0.13876	0.0046	0.033	all1	258	262	257
OG0013453	AT1G02870.1	0.11737	0.07772	0.029811	0.020564	all1	193	530	191
OG0015964	AT3G44330.1	0.17993	0.11073	0.027299):	0.043845):	all1	565	592	564
OG0011617	AT5G39865.1	0.26635	0.15658	A:0.27083	G:0.22321	all1	390	453	351
OG0007145	AT5G61410.1	0.07413	0.17362	C:0.16014	A:0.27758	Ara1	281	294	281
OG0005301	AT1G08310.1	0.20794	0.10344	0.0073	0.0707	variable	315	395	307
OG0007015	AT1G55760.1	0.11618	0.17403	0.0033	0.0191	Ara1	329	329	329
OG0013503	AT3G03750.2	0.27161	0.09227	0.3630)	0.2013	all1	338	366	332
OG0015834	AT5G59460.1	0.35027	0.61706	0.0146	0.0236	all1	172	407	171
OG0011747	AT1G75800.1	0.16655	0.08625	0.0062	0.0716	all1	330	333	327
OG0008622	AT4G31600.1	0.04548	0.05424	0.0026	0.0477	all1	323	323	323
OG0008772	AT4G20270.1	0.14296	0.19551	0.0078	0.04	all1	992	1000	992
OG0020405	AT1G05030.1	0.2123	0.3592	C:0.21336	A:0.24353	variable	524	640	464
OG0003309	AT5G09250.1	0.30476	84.3165	0	0	Ara1	107	165	107
OG0007781	AT1G31810.1	0.17417	0.07302	0.007	0.0963	Ara1	1230	1377	466
OG0013297	AT3G57480.1	0.09521	0.0145	0.2506)	0.0717	all1	249	252	247
OG0011183	AT1G08125.1	0.1763	0.24363	C:0.19093	A:0.29641	all1	315	444	316
OG0005495	AT1G55210.1	0.10984	0.0001	0.159843	0.036976	Ara1	187	192	187
OG0003259	AT4G25880.1	0.1773	0.2061	A:0.28845	G:0.23497	Ara1	861	896	854
OG0018932	AT1G55920.1	0.13122	0.11628	0.0058	0.0496	variable	314	315	311
OG0008207	AT5G44290.1	0.11303	0.27904	C:0.18056	A:0.31784	variable	644	681	640
OG0018862	AT1G56418.1	0.37448	0.35075	0.0358	0.1021	variable	79	158	48
OG0018399	AT1G12940.1	0.1346	0.33555	C:0.27309	A:0.18072	variable	502	518	498
OG0015779	AT4G16070.1	0.16271	0.12548	0.0065	0.0521	all1	654	663	654
OG0015629	AT4G12000.1	0.20683	0.26543	0.0134	0.0504	all1	306	337	306
OG0008075	AT5G05610.2	0.07227	0.0001	0.0862)	0.0247	Ara1	241	243	240
OG0008125	AT1G25500.1	0.1022	0.01402	0.3444)	0.0509	Ara1	306	529	430
OG0008450	AT3G24790.1	0.19988	0.77464	0.0246	0.0318	all1	363	385	369
OG0005869	AT1G09170.1	0.21227	0.16858	A:0.32320	G:0.20061	Ara1	1010	1174	987
OG0005392	AT2G43320.1	0.12013	0.15462	(0.0262	0.1699)	Ara1	351	476	350
OG0011684	AT5G59750.1	0.14654	0.98035	0.0026	0.0027	all1	509	510	500
OG0013590	AT4G16790.1	0.25811	0.13607	1.71183	0.258108	all1	473	502	461
OG0017118	AT2G25940.1	0.15561	0.3289	0.0069	0.0209	Ara1	478	492	479
OG0007086	AT5G43300.1	0.35144	0.25556	0.0076	0.0298	Ara1	370	446	369
OG0005939	AT1G11720.1	0.16855	0.26369	C:0.17946	A:0.30742	Ara1	1042	1786	1029
OG0005023	AT5G51340.1	0.1825	0.21127	0.042463	0.011409	Ara1	726	844	725
OG0007267	AT1G30840.1	0.23629	0.14592	0.0064	0.0441	Ara1	382	423	380
OG0011535	AT2G23770.1	0.23179	0.22341	0.016	0.0714	all1	612	660	591
OG0017802	AT2G45130.1	0.07882	0.0001	0.018661	0.012391	Ara1	245	245	118
OG0013771	AT5G58030.1	0.0064	0.0001	0.1501)-1.0000	(0.0000	all1	195	195	195
OG0013621	AT3G20890.1	0.09928	0.19806	A:0.29078	G:0.26241	all1	292	376	282
OG0005173	AT2G29640.1	0.33755	0.18217	0.0115	0.063	Ara1	360	407	174
OG0007337	AT3G04370.2	0.42361	0.2039	A:0.22062	G:0.33852	Ara1	319	351	307
OG0013204	AT1G26480.1	0.03676	0.03268	(0.0097	0.2879)	all1	268	286	268
OG0011040	AT1G22470.1	0.2316	0.15511	(0.0623	0.3998)	all1	146	198	146
OG0007712	AT2G18196.1	0.06688	0.17799	0.0135	0.076	variable	178	181	176
OG0005556	AT1G55370.1	0.2414	0.11927	0.0059	0.0492	Ara1	308	404	353
OG0003861	AT5G10720.1	0.12079	0.14873	0.0071	0.0478	variable	922	938	900
OG0007642	AT3G24050.1	0.18403	0.31066	G:0.33708	0.207664	Ara1	274	296	252
OG0005406	AT5G24890.1	0.13667	0.18443	C:0.24324	A:0.40541	variable	240	272	222
OG0003931	AT5G21222.1	0.21573	0.30369	C:0.19013	A:0.32972	Ara1	831	840	831
OG0015598	AT5G07720.1	0.07313	0.08234	(0.0347	0.4219)	Ara1	457	458	455
OG0013354	AT2G25270.1	0.20325	0.37764	0.0078	0.0206	all1	545	554	410
OG0011110	AT1G18070.1	0.14494	0.1383	0.0073	0.0528	all1	532	539	532
OG0008294	AT2G38460.1	0.17939	0.1461	(0.0356	0.2437)	Ara1	524	542	519
OG0018423	AT5G01210.1	0.10969	0.09002	(0.0228	0.2520)	Ara1	475	492	474
OG0018573	AT2G35380.1	0.11047	0.17332	0.0053	0.0308	variable	336	338	336
OG0011639	AT5G66180.1	0.2578	0.12238	0.0096	0.0785	all1	395	415	395
OG0011769	AT2G02160.1	0.28558	0.75435	0.0097	0.0128	all1	669	700	665
OG0005984	AT3G48210.1	0.30742	0.30533	0.0123	0.0404	variable	315	465	315
OG0013108	AT1G68150.1	0.31725	0.21243	0.0145	0.0682	all1	374	409	304
OG0017580	AT5G51400.1	0.05648	0.29644	0.0133	0.045	Ara1	241	390	234
OG0001929	AT1G56450.1	0.0855	0.62382	0.0075	0.012	variable	246	297	245
OG0003096	AT1G04050.1	0.47458	0.23827	G:0.24473	position	Ara1	734	781	626
OG0015694	AT1G17310.1	0.31621	0.50187	0.0342	0.0682	all1	217	263	211
OG0013058	AT1G07850.1	0.0526	0.06173	(0.0246	0.3963)	all1	541	994	507
OG0008198	AT5G08520.1	0.14074	0.28809	0.0046	0.016	Ara1	298	320	292
OG0013942	AT1G77405.1	0.14398	0.11637	0.0079	0.0683	all1	458	688	438
OG0015475	AT2G01270.1	0.23689	0.058	0.0018	0.0317	all1	495	510	494
OG0003327	AT2G46620.1	0.11548	0.07045	0.0079	0.1115	Ara1	491	493	479
OG0003277	AT5G26720.1	0.3249	0.14841	A:0.35128	G:0.24872	Ara1	134	267	130
OG0013812	AT5G63790.1	0.11852	0.31795	0.0244	0.0767	all1	312	323	265
OG0015525	AT3G28007.1	0.19259	0.28082	0.0174	0.0619	all1	251	253	248
OG0017761	AT3G07410.1	0.02938	2.336	0	0	Ara1	217	217	217
OG0008882	AT4G07390.1	0.07978	0.06755	(0.0287	0.4166)	all1	235	235	235
OG0008229	AT3G52920.1	0.08514	999	0.01	0	Ara1	180	188	165
OG0007921	AT4G15080.1	0.14799	0.12289	0.0031	0.0256	Ara1	718	726	701
OG0001416	AT4G18230.1	0.22363	0.4264	0.0054	0.0126	Ara1	233	418	233
OG0017344	AT5G42820.1	0.03396	0.0001	0.0795)	lnL(ntime:	Ara1	283	308	280
OG0015100	AT5G04270.1	0.23822	0.03473	0.10893	0.017122	all1	271	414	271
OG0011588	AT5G60970.1	0.10183	0.03627	0.0028	0.0769	all1	360	387	348
OG0017214	AT1G03600.1	0.13093	0.08751	0.0044	0.05	Ara1	174	220	173
OG0015050	AT1G63910.1	0.22022	999	0.0008	0	all1	370	388	369
OG0003702	AT4G10890.1	0.48954	0.70927	0.0184	0.026	Ara1	527	536	287
OG0007871	AT4G22790.1	0.27561	0.1214	0.0093	0.0766	Ara1	491	512	489
OG0002494	AT3G19350.1	0.47031	0.30734	0.0281	0.0914	variable	103	229	56
OG0014296	AT3G54830.1	0.12876	0.34007	0.0214	0.0629	all1	546	617	412
OG0004308	AT2G44770.1	0.06187	0.15256	0.0061	0.0399	variable	266	266	266
OG0019021	AT4G25780.1	0.33782	0.40182	(0.0904	0.2249)	variable	190	201	182
OG0006569	AT3G59660.1	0.13068	0.09903	0.0031	0.031	Ara1	594	600	591
OG0006439	AT1G43780.1	0.21789	0.26532	0.0099	0.0371	Ara1	479	480	459
OG0010890	AT5G09978.1	0.74686	2.21698	0.0386	0.0174	all1	85	183	81
OG0016746	AT5G56740.1	0.20681	0.0844	0.0053	0.0632	Ara1	467	474	467
OG0012835	AT5G65460.1	0.1698	0.17576	0.057608	0.008367	all1	1264	1291	1263
OG0014502	AT3G27890.1	0.08045	0.3613	0.0942	(0.0300	all1	196	209	196
OG0006788	AT3G54210.1	0.06356	0.09431	0.0076	0.0802	Ara1	211	241	209
OG0016616	AT1G69690.1	0.05304	0.06605	0.0041	0.0617	Ara1	325	350	326
OG0012965	AT3G56310.1	0.1311	0.1277	(0.0090	0.0702)	all1	437	460	436
OG0014452	AT1G78590.1	0.147	0.07692	0.0038	0.0492	all1	317	317	317
OG0006856	AT2G19170.1	0.09489	0.03015	0.2688)	0.1087	Ara1	815	826	815
OG0002725	AT4G02050.1	0.07712	0.34791	0.0113	0.0323	variable	513	518	512
OG0014077	AT1G78160.1	0.20086	0.16072	0.0092	0.0571	all1	650	711	593
OG0016233	AT1G19700.1	0.11506	0.13281	0.0074	0.0556	all1	538	563	529
OG0016898	AT1G19570.1	0.17812	0.0001	0.105307	0.026442	Ara1	213	213	213
OG0014127	AT1G69070.1	0.31145	0.31549	C:0.15556	A:0.27000	all1	901	926	900
OG0016363	AT5G10070.2	0.12266	0.30346	0.0141	0.0464	all1	185	292	266
OG0006906	AT3G04810.2	0.12462	0.1108	0.0044	0.0396	Ara1	606	613	603
OG0002675	AT1G63855.1	0.21956	0.25144	0.0044	0.0177	Ara1	159	236	182
OG0009102	AT3G15260.2	0.08231	0.15338	0.0059	0.0388	all1	289	323	288
OG0009052	AT5G24260.1	0.16877	0.22125	0.2049	(0.0610	all1	746	750	716
OG0010286	AT2G36690.1	0.17437	0.09249	0.0069	0.0745	all1	366	452	364
OG0004790	AT4G39380.1	0.4491	0.52148	0.0212	0.0407	Ara1	518	596	483
OG0012192	AT3G54790.1	0.17916	0.11836	(0.0227	0.1924)	all1	760	816	760
OG0014880	AT4G35530.1	0.47518	0.20615	A:0.24742	G:0.18557	all1	195	269	194
OG0009477	AT5G25790.1	0.39362	0.64135	0.0181	0.0282	variable	459	559	437
OG0009527	AT1G67660.1	0.1701	0.33052	0.171	(0.0575	all1	355	419	350
OG0006310	AT4G03260.1	0.26981	0.17409	A:0.27259	G:0.18963	Ara1	677	752	675
OG0004154	AT2G45670.1	0.20154	0.11441	0.0065	0.0572	variable	539	746	527
OG0012606	AT3G12800.1	0.11483	0.06272	(0.0188	0.2970)	all1	298	318	298
OG0010442	AT2G27050.1	0.11105	0.13184	A:0.23014	G:0.30160	all1	584	593	572
OG0016975	AT3G07568.1	0.20498	0.2979	0.0189	0.0634	variable	68	193	68
OG0012756	AT1G74720.1	0.0572	0.05509	(0.0065	0.1164)	all1	1081	1139	1054
OG0010512	AT2G20570.1	0.22179	0.10245	0.0047	0.0459	all1	420	444	391
OG0006240	AT2G22010.1	0.13478	0.10646	(0.0279	0.2620)	Ara1	1280	1285	1267
OG0004004	AT5G62180.1	0.33787	0.30235	0.0144	0.0476	Ara1	327	332	326
OG0009948	AT4G04630.1	0.19626	0.12897	A:0.37037	G:0.17284	all1	168	198	162
OG0009818	AT1G12050.1	0.14309	0.06273	0.067753	0.01261	all1	421	428	421
OG0010137	AT5G57590.1	0.21747	0.16936	0.123783	0.011628	all1	833	846	837
OG0012373	AT1G71480.1	0.23908	0.43314	0.0162	0.0375	variable	216	255	216
OG0012888	AT5G46230.1	0.12879	999	0.0127	0	all1	143	144	143
OG0004421	AT5G53120.1	0.10514	0.11813	(0.0328	0.2779)	Ara1	359	384	359
OG0006665	AT1G67080.1	0.20343	0.67842	0.0137	0.0202	Ara1	220	233	220
OG0004571	AT5G37930.1	0.39031	0.13214	0.0101	0.0761	Ara1	349	1125	346
OG0006735	AT3G03960.1	0.04372	0.06269	(0.0064	0.1012)	variable	549	549	548
OG0010067	AT2G31670.1	0.27924	0.08141	0.145189	0.059777	all1	263	295	263
OG0012223	AT2G24430.1	0.08472	0.10243	0.0028	0.0271	all1	316	320	314
OG0014619	AT2G16280.1	0.04705	0.0001	0.079796	0.036402	all1	512	519	503
OG0010291	AT4G25140.1	0.15038	0.04659	(0.0027	0.0560)	all1	173	196	169
OG0004787	AT3G14930.1	0.17318	0.14516	0.0047	0.0326	Ara1	418	481	418
OG0006493	AT2G16060.1	0.1149	0.07589	(0.0135	0.1778)	variable	160	160	160
OG0012185	AT3G01230.1	0.7094	0.54053	0.0393	0.0727	all1	126	157	126
OG0014749	AT1G01305.1	0.66609	0.43899	0.0154	0.035	all1	141	143	118
OG0009115	AT4G02270.1	0.34463	0.353	0.0158	0.0449	all1	165	166	165
OG0009045	AT3G44880.1	0.10212	0.0001	0.113424	0.025194	all1	537	540	537
OG0009530	AT5G53430.1	0.15806	0.07894	0.0036	0.0456	all1	1043	1128	941
OG0004909	AT1G67310.1	0.34109	0.36727	0.0178	0.0486	Ara1	1016	1661	962
OG0014897	AT5G54090.1	0.17912	0.11081	0.0056	0.0509	all1	796	831	772
OG0016128	AT1G28480.1	0.30576	0.26285	G:0.43609	position	all1	137	141	133
OG0016078	AT1G70920.1	0.30194	0.35881	(0.0659	0.1832)	Ara1	206	256	204
OG0009681	AT3G07310.1	0.14379	0.03893	0.3154)	0.1323	all1	368	379	368
OG0004143	AT5G11610.1	0.30978	0.18224	0.0124	0.0683	Ara1	546	637	543
OG0006307	AT5G57330.1	0.07111	0.15079	0.0072	0.0476	Ara1	312	330	312
OG0010455	AT1G04070.1	0.38873	0.16735	0.0263	0.157	all1	94	145	94
OG0012611	AT5G16490.1	0.27778	0.38252	0.0099	0.0259	all1	153	171	146
OG0016299	AT4G01560.1	0.08143	0.20421	0.0067	0.0329	all1	343	366	347
OG0010505	AT4G24640.1	0.48835	0.28487	A:0.24955	G:0.24440	all1	187	187	187
OG0012741	AT1G26550.1	0.02875	0.15139	0.0077	0.0507	all1	142	168	142
OG0004013	AT4G02020.1	0.30618	0.4269	0.0079	0.0184	Ara1	856	1055	841
OG0006257	AT5G13920.1	0.49961	0.23824	C:0.19948	A:0.33858	Ara1	415	470	381
OG0012364	AT5G59000.1	0.22869	0.17171	0.0165	0.0963	all1	231	263	217
OG0010120	AT4G37650.1	0.05738	0.04193	(0.0112	0.2721)	all1	531	538	529
OG0006672	AT3G49780.1	0.3436	0.36153	0.0118	0.0327	Ara1	79	79	79
OG0004436	AT4G26160.1	0.38912	0.229	0.017	0.0744	Ara1	221	233	216
OG0002901	AT2G46410.1	0.07583	0.0001	0.1387)	0.1477	variable	94	95	85
OG0006722	AT1G29400.1	0.14524	0.16677	(0.0335	0.2003)	Ara1	800	806	796
OG0004566	AT4G02260.1	0.16059	0.0654	0.0013	0.0195	Ara1	884	928	882
OG0002851	AT1G28395.1	0.2805	0.07623	(0.0146	0.1909)	Ara1	95	157	95
OG0012234	AT3G58520.1	0.10518	0.09089	0.0057	0.0627	all1	418	420	418
OG0010070	AT5G17610.1	0.247	0.04933	0.2694)	0.1061	all1	121	175	120
OG0019543	AT5G24105.1	0.41405	0.2883	0.012	0.0416	Ara1	63	63	63
OG0010759	AT5G44180.1	0.19067	0.26797	0.0074	0.0277	all1	1694	1749	1674
OG0014281	AT2G42110.1	0.20749	0.85311	0.0102	0.012	all1	137	168	133
OG0010609	AT3G45240.1	0.18951	0.18702	(0.0567	0.3016)	all1	396	427	394
OG0012068	AT5G61000.1	0.10935	0.02847	0.2153)	0.087236	all1	629	701	628
OG0000919	AT3G57710.1	0.23716	0.21061	0.1979	(0.0384	variable	351	360	349
OG0012138	AT1G01280.1	0.1211	0.08947	(0.0209	0.2340)	all1	510	515	510
OG0010887	AT5G58250.1	0.23507	0.18762	0.0093	0.0495	all1	211	211	209
OG0019036	AT4G32720.1	0.13614	0.13135	0.0059	0.0451	variable	433	446	433
OG0012822	AT1G72190.1	0.20765	0.21653	A:0.24054	G:0.18378	all1	373	416	370
OG0014515	AT3G54220.1	0.06541	0.19649	0.098664	0.018149	all1	653	671	565
OG0002317	AT3G13940.1	0.37947	0.60349	0.0544	0.0902	variable	442	863	409
OG0012289	AT5G05830.1	0.33988	0.31711	0.0125	0.0393	all1	204	224	207
OG0012972	AT2G38920.1	0.1628	0.0001	0.109138	0.025755	all1	335	341	332
OG0014445	AT3G61540.1	0.1831	0.3077	C:0.19104	A:0.25823	all1	515	518	506
OG0016601	AT1G07710.1	0.11528	0.04605	0.003062	0.051638	variable	543	545	543
OG0009219	AT5G52920.1	0.04336	0.0001	0.1117)	lnL(ntime:	all1	579	586	579
OG0019387	AT5G62860.1	0.6211	0.48235	0.018	0.0374	variable	218	388	102
OG0009349	AT1G59650.1	0.06082	0.25178	0.0387	(0.0102	all1	492	516	493
OG0002732	AT4G22930.1	0.1362	0.0001	0.088562	0.026764	variable	377	481	377
OG0014060	AT2G26500.1	0.12663	0.10595	0.0034	0.032	all1	125	277	123
OG0016374	AT3G63170.1	0.22173	0.25148	G:0.34532	position	all1	279	308	278
OG0014130	AT1G16740.1	0.01855	0.0001	0.2694)	0.0133	all1	126	126	126
OG0002662	AT5G51300.3	0.12257	0.09067	0.103212	0.063306	variable	804	866	790
OG0006911	AT2G29090.1	0.16797	0.14605	0.0099	0.068	Ara1	482	498	480
OG0005993	AT2G03667.1	0.22565	0.27648	(0.0613	0.2217)	Ara1	610	626	604
OG0005268	AT3G19360.1	0.12632	0.13274	0.0063	0.0478	Ara1	386	413	383
OG0018434	AT3G01240.1	0.64365	0.98732	0.0253	0.0256	Ara1	130	348	128
OG0018564	AT3G15500.1	0.12383	0.0537	0.003	0.0555	Ara1	317	334	316
OG0018011	AT5G09610.1	0.66639	0.79362	0.0396	0.0499	Ara1	517	538	297
OG0003081	AT4G24140.1	0.20006	0.52319	0.0161	0.0307	Ara1	498	499	485
OG0007409	AT5G42650.1	0.15643	0.05831	0.0044	0.0747	variable	518	525	509
OG0007559	AT1G57790.1	0.38458	0.11553	0.0058	0.0505	Ara1	352	454	349
OG0015683	AT5G01300.1	0.16996	0.25953	G:0.36420	position	all1	162	224	162
OG0008895	AT4G36970.1	0.10595	0.05782	0.0037	0.0647	all1	427	493	423
OG0017626	AT1G75660.1	0.1099	0.21233	0.0739	(0.0130	variable	1020	1056	1014
OG0013955	AT5G58720.1	0.3003	0.19247	C:0.14683	A:0.29167	all1	519	536	504
OG0015462	AT2G45450.1	0.31293	0.08793	0.057344	0.114009	all1	136	145	92
OG0003330	AT2G24840.1	0.18516	0.25456	C:0.17157	A:0.33170	variable	264	470	210
OG0003260	AT5G11470.1	0.43682	0.46126	0.0113	0.0244	variable	711	824	635
OG0013805	AT5G59500.1	0.20439	0.11384	0.0054	0.0476	all1	396	503	396
OG0015532	AT5G03280.1	0.20255	0.09714	0.0038	0.0395	all1	1294	1406	1293
OG0005089	AT3G02350.1	0.05603	0.04668	0.0031	0.0659	Ara1	561	561	559
OG0007936	AT3G28860.1	0.02604	0.01997	(0.0035	0.1733)	Ara1	1252	1255	1252
OG0001401	AT3G10010.1	0.36906	0.39168	0.0309	0.079	Ara1	1332	1482	1070
OG0003645	AT3G24220.1	0.1997	0.30142	C:0.21562	A:0.30548	variable	577	900	572
OG0015117	AT1G01040.1	0.09416	0.07797	0.0036	0.0468	all1	1909	2013	1886
OG0015047	AT4G35170.1	0.45842	0.4595	0.0294	0.0639	all1	299	305	298
OG0007866	AT4G38530.1	0.30099	0.51342	0.0068	0.0133	Ara1	564	586	572
OG0003715	AT5G07630.1	0.36878	0.84362	0.0074	0.0088	variable	611	617	476
OG0008062	AT1G03090.2	0.16405	0.07057	0.073019	0.083312	Ara1	714	747	727
OG0008132	AT3G28670.1	0.23781	0.44414	0.0163	0.0367	Ara1	491	509	487
OG0005385	AT1G24560.1	0.17177	0.05226	0.0026	0.0502	Ara1	678	696	678
OG0003549	AT2G20470.1	0.03539	0.10022	0.0013	0.0129	Ara1	569	611	548
OG0011693	AT2G38610.2	0.01457	0.0001	0.1104)-1.0000	(0.0000	all1	286	296	286
OG0013587	AT5G21040.1	0.23638	0.16593	A:0.22159	G:0.25379	Ara1	539	549	531
OG0003419	AT4G26555.1	0.19837	0.11327	0.0074	0.065	variable	207	234	203
OG0007091	AT5G63550.1	0.32747	0.62561	0.0047	0.0075	Ara1	530	576	500
OG0008517	AT5G67050.1	0.3229	0.42843	0.012	0.028	all1	477	482	477
OG0008447	AT3G26060.1	0.10434	0.18142	0.0095	0.0525	all1	216	218	216
OG0007270	AT3G14010.1	0.48739	0.91028	0.0262	0.0288	Ara1	595	637	578
OG0005034	AT3G23190.1	0.51656	0.64829	0.0288	0.0445	Ara1	216	281	214
OG0013766	AT4G20430.1	0.14341	0.07634	0.0037	0.049	all1	856	1021	854
OG0011522	AT5G39820.1	0.12239	2.58393	0	0	variable	337	624	269
OG0013636	AT2G40650.1	0.04675	0.10977	0.0055	0.0504	all1	355	413	350
OG0011472	AT1G02660.1	0.1759	0.14413	(0.0429	0.2963)	all1	713	735	691
OG0007320	AT3G20300.1	0.0657	0.0879	0.0046	0.0529	Ara1	452	485	447
OG0005164	AT4G36930.1	0.13269	0.11262	0.0096	0.0852	Ara1	373	404	337
OG0018738	AT3G17675.1	0.35851	0.38817	0.0039	0.0101	Ara1	129	146	129
OG0008828	AT3G52420.1	0.30714	0.45465	0.0384	0.0844	all1	64	107	64
OG0008283	AT3G12690.1	0.09703	0.14201	0.0104	0.0731	Ara1	577	686	575
OG0008978	AT1G79800.1	0.23377	0.32528	0.0387	0.119	all1	192	210	177
OG0011057	AT5G66470.1	0.11147	0.1358	0.0039	0.0284	all1	427	427	422
OG0013213	AT1G49430.1	0.14192	0.11257	0.0041	0.0366	all1	665	685	601
OG0005541	AT2G32910.1	0.42502	0.44226	0.03	0.0679	Ara1	691	870	639
OG0003876	AT3G49601.1	0.30169	0.12003	0.0061	0.0509	variable	591	694	538
OG0007705	AT5G66840.1	0.46727	0.2498	0.0246	0.0985	Ara1	551	676	489
OG0005411	AT5G45600.1	0.0427	0.06698	(0.0145	0.2157)	Ara1	268	269	267
OG0007655	AT5G01075.1	0.33363	0.09586	0.0118	0.1232	Ara1	81	270	76
OG0001099	AT4G10320.1	0.18538	0.24375	0.1768	(0.0402	variable	1190	1224	1186
OG0011107	AT1G16040.1	0.4498	0.50161	0.0074	0.0148	all1	226	254	228
OG0013343	AT4G39050.1	0.09905	0.13613	0.0032	0.0232	all1	1055	1110	1055
OG0005720	AT1G16710.1	0.2619	0.34325	0.0106	0.0309	Ara1	1706	1902	1642
OG0007564	AT2G17130.1	0.05767	0.04561	0.095013	0.083473	Ara1	367	369	364
OG0011236	AT5G06270.1	0.03895	0.15801	0.004	0.0254	all1	122	130	121
OG0013072	AT2G38300.1	0.2877	0.22788	(0.0543	0.2371)	all1	340	363	336
OG0011366	AT1G63960.1	0.16286	0.23065	0.0483	0.2095	all1	101	142	87
OG0013122	AT4G11820.1	0.08433	0.17392	0.0515	(0.0148	all1	406	461	416
OG0005670	AT2G21970.1	0.10659	0.12766	0.0064	0.0502	Ara1	202	210	194
OG0007434	AT5G40850.1	0.07457	0.0001	0.099269	0.039743	Ara1	369	382	363
OG0015830	AT4G17240.1	0.14485	0.16955	A:0.27485	G:0.33626	all1	343	353	342
OG0013507	AT1G04650.1	0.39587	0.2671	0.0188	0.0703	all1	997	1000	960
OG0011743	AT3G51470.1	0.04367	0.07688	(0.0164	0.2115)	all1	361	364	361
OG0003499	AT1G49870.1	0.23455	0.28657	0.2766	(0.0801	variable	828	1029	812
OG0007011	AT5G01520.1	0.10106	0.11067	(0.0217	0.1950)	Ara1	242	311	242
OG0005255	AT1G54710.1	0.12694	0.19849	A:0.26310	G:0.32205	Ara1	927	1495	916
OG0007141	AT4G28660.1	0.18542	0.12115	0.24338	0.101946	Ara1	183	573	182
OG0015960	AT5G09920.1	0.01588	0.17406	0.091524	0.012615	all1	138	138	138
OG0013457	AT5G06940.1	0.21142	0.0996	0.0032	0.0322	all1	872	918	873
OG0011613	AT1G25510.1	0.11938	0.10142	0.0068	0.0667	all1	483	493	479
OG0018559	AT1G70000.1	0.20675	0.21115	(0.0519	0.2454)	Ara1	261	280	245
OG0018409	AT4G20140.1	0.16529	0.14177	(0.0419	0.2958)	Ara1	1249	1255	1249
OG0008597	AT1G72020.1	0.11939	0.33758	0.028024	0.039373	all1	97	128	96
OG0003678	AT3G10070.1	0.26656	0.36121	0.0163	0.0451	Ara1	539	544	536
OG0008776	AT4G01470.1	0.06229	0.05615	0.0019	0.0339	all1	252	261	252
OG0008626	AT4G32690.1	0.0967	0.16451	(0.0427	0.2574)	all1	175	175	175
OG0018866	AT1G73150.1	0.28185	0.22257	A:0.36203	G:0.15673	variable	461	499	454
OG0008203	AT5G43880.1	0.25494	0.52693	0.012	0.0227	Ara1	836	949	820
OG0008353	AT1G01225.1	0.14694	0.11352	0.0055	0.0484	variable	260	283	238
OG0018936	AT1G70880.1	0.31129	0.66947	0.0302	0.0452	variable	159	159	149
OG0005491	AT3G54320.1	0.19251	0.35749	G:0.16667	0.132611	Ara1	438	494	414
OG0011187	AT1G51790.1	0.29428	0.30495	C:0.20490	A:0.29176	all1	882	1066	470
OG0013838	AT3G02700.1	0.14997	0.18786	(0.0312	0.1665)	all1	252	294	252
OG0013968	AT2G28780.1	0.15154	0.18017	A:0.30730	G:0.31108	all1	796	803	794
OG0013293	AT5G55500.1	0.13606	0.19046	A:0.23810	G:0.27429	all1	534	555	525
OG0007785	AT5G18920.1	0.13996	0.0001	0.1607)-1.0000	(0.0000	Ara1	77	81	74
OG0015376	AT2G45680.1	0.21841	0.22248	C:0.26879	A:0.26879	all1	356	373	346
OG0017132	AT4G13040.1	0.32299	0.35625	0.0374	0.1051	variable	226	242	220
OG0003424	AT1G04400.1	0.13154	0.03344	0.2668)	0.1398	Ara1	612	673	610
OG0005913	AT2G21045.1	0.21445	0.17805	A:0.28571	G:0.27619	variable	169	170	140
OG0003574	AT4G25870.1	0.16027	0.13021	(0.0303	0.2334)	Ara1	389	418	389
OG0005843	AT5G48655.3	0.25045	0.23851	0.0106	0.0443	Ara1	203	227	202
OG0015226	AT5G10730.1	0.19119	0.13989	0.0062	0.0446	all1	287	394	287
OG0017062	AT5G41030.1	0.40905	0.42952	0.0114	0.0266	Ara1	243	312	209
OG0018091	AT2G32020.1	0.22452	0.0001	0.093275	0.029557	Ara1	183	186	181
OG0003151	AT1G13750.1	0.15767	0.09914	(0.0263	0.2644)	variable	613	626	613
OG0017447	AT1G69935.1	0.27715	0.42544	0.0288	0.0678	Ara1	192	331	188
OG0011970	AT1G34065.1	0.1609	0.23794	0.092951	0.025787	all1	345	359	317
OG0015603	AT3G53520.1	0.04332	0.0001	0.0790)	lnL(ntime:	all1	435	435	428
OG0011820	AT1G22860.1	0.17035	0.22743	0.0044	0.0194	all1	984	1006	979
OG0015753	AT3G20870.1	0.08287	0.12925	0.004	0.0313	all1	276	277	275
OG0007489	AT5G24300.1	0.15722	0.02053	0.1681)	0.1047	Ara1	652	685	649
OG0008945	AT2G37230.1	0.08304	0.08438	(0.0184	0.2171)	all1	757	782	756
OG0008815	AT4G32605.1	0.12115	0.05483	0.004	0.0733	all1	227	586	225
OG0007668	AT5G02760.1	0.18104	0.16939	C:0.20056	A:0.30641	Ara1	370	589	370
OG0013885	AT1G32860.1	0.14705	0.45007	0.0139	0.0309	all1	426	485	410
OG0007738	AT5G45900.1	0.13928	0.23948	0.0057	0.0239	Ara1	697	1042	697
OG0005009	AT4G23450.1	0.27879	0.80978	0.0364	0.0449	Ara1	153	170	153
OG0017828	AT2G21560.1	0.34297	0.56325	0.0198	0.0351	Ara1	274	276	265
OG0015197	AT5G61880.1	0.31881	0.32843	0.0126	0.0384	all1	113	150	112
OG0018705	AT4G00760.1	0.83588	0.58743	0.056	0.0953	Ara1	336	438	276
OG0016045	AT4G17950.1	0.21227	0.24466	(0.0602	0.2465)	all1	439	482	386
OG0014201	AT1G12860.1	0.1619	0.09078	0.003	0.0328	all1	450	500	439
OG0010689	AT5G23610.1	0.37589	0.72914	0.0254	0.0349	all1	499	562	465
OG0004864	AT2G18400.1	0.05132	0.0001	0.0149)	0.0359	Ara1	102	180	102
OG0002403	AT3G66656.1	0.33185	1.24533	0.0212	0.017	Ara1	178	185	166
OG0004934	AT5G17990.1	0.19852	0.28062	C:0.18962	A:0.26938	Ara1	444	447	443
OG0016115	AT5G03670.1	0.16603	0.13765	1.33408	0.166033	all1	516	540	502
OG0014351	AT2G17940.1	0.36694	0.62241	0.0069	0.011	all1	208	216	210
OG0000999	AT3G61340.1	0.69289	0.81877	0.0335	0.0409	variable	410	883	404
OG0002026	AT1G47915.1	0.253	0.18918	0.0124	0.0654	variable	73	251	63
OG0014774	AT1G03630.1	0.07009	0.03739	0.0024	0.0649	all1	401	403	401
OG0016530	AT2G29735.1	0.29416	0.84101	0.0512	0.0609	variable	117	153	110
OG0010807	AT3G49170.1	0.19412	0.12902	0.0052	0.0403	all1	850	1322	850
OG0014624	AT1G07230.1	0.08722	0.04335	0.0027	0.0628	all1	533	533	529
OG0016460	AT2G47390.1	0.11388	0.10851	0.0045	0.0416	variable	961	962	960
OG0010957	AT1G02120.1	0.29309	0.18835	A:0.28360	G:0.25873	all1	598	651	563
OG0009078	AT5G43140.1	0.18542	0.54927	0.0189	0.0343	all1	254	314	253
OG0009128	AT5G22240.1	0.33864	0.0001	0.104969	0.010892	all1	196	221	162
OG0002397	AT4G14660.1	0.23289	0.37796	0.0119	0.0316	Ara1	178	220	175
OG0012209	AT5G57520.1	0.13025	0.41718	0.0094	0.0224	all1	150	203	142
OG0014595	AT1G72440.1	0.21496	0.16161	0.0127	0.0783	all1	1043	1088	1006
OG0012359	AT5G02390.1	0.21106	0.25884	0.011	0.0426	all1	835	899	820
OG0009832	AT5G53045.1	0.10829	206.851	0	0	all1	96	104	96
OG0009962	AT1G68330.1	0.16938	0.08987	0.0022	0.0249	all1	268	279	264
OG0009299	AT2G47400.1	0.17028	0.28356	A:0.31418	G:0.20197	all1	124	132	124
OG0010538	AT4G38810.2	0.21262	0.08872	(0.0267	0.2981)	all1	265	380	372
OG0006991	AT1G26520.1	0.18107	0.1624	0.0092	0.0564	variable	374	379	354
OG0010468	AT3G18640.1	0.34946	0.23477	C:0.16844	A:0.34725	all1	676	747	639
OG0006413	AT1G49320.1	0.27923	0.34267	0.2484	(0.0961	variable	280	280	280
OG0004657	AT5G17070.1	0.32973	0.4788	0.0211	0.044	Ara1	277	306	257
OG0012105	AT2G23460.1	0.08889	0.11057	(0.0227	0.2057)	all1	888	942	870
OG0010341	AT2G47770.1	0.16067	0.0001	0.106622	0.028961	all1	196	196	196
OG0014699	AT5G04390.1	0.28726	0.87337	0.0079	0.0091	all1	362	376	359
OG0012055	AT3G16470.2	0.21386	0.39791	0.0135	0.0339	all1	451	758	444
OG0010211	AT1G11890.1	0.03266	0.0001	0.1469)-1.0000	(0.0000	all1	218	225	218
OG0006543	AT3G12520.1	0.23251	0.3234	0.0149	0.046	Ara1	677	686	671
OG0004707	AT4G39190.1	0.35463	0.69935	0.0284	0.0406	Ara1	277	288	248
OG0009195	AT3G52900.1	0.08505	0.15011	0.054898	4e-06	all1	164	182	164
OG0014947	AT3G48560.1	0.09321	0.06486	0.0048	0.074	all1	670	678	662
OG0012470	AT1G55120.1	0.25265	0.20451	A:0.26325	G:0.22906	all1	594	632	588
OG0004322	AT1G43245.1	0.41549	0.47469	0.0207	0.0436	Ara1	558	603	540
OG0006166	AT1G26330.1	0.53992	0.4931	0.0255	0.0516	Ara1	1189	1417	1179
OG0004272	AT1G55830.1	0.3584	0.24891	C:0.16833	A:0.34411	Ara1	412	536	406
OG0006036	AT5G37570.1	0.14795	0.1753	0.1788	(0.0524	Ara1	550	564	547
OG0004989	AT4G30020.1	0.06855	0.11219	0.0024	0.0211	Ara1	816	816	816
OG0010764	AT3G63250.1	0.15721	0.11828	0.0038	0.032	all1	333	601	333
OG0014817	AT4G37750.1	0.10306	0.52429	0.0111	0.0212	all1	555	616	545
OG0012520	AT4G22810.1	0.06578	0.02226	0.0012	0.0553	all1	324	341	324
OG0009601	AT5G03555.1	0.1784	0.27158	G:0.26405	position	all1	599	660	589
OG0009751	AT5G50030.1	0.37518	0.17359	0.009718	0.146336	all1	187	717	187
OG0016349	AT5G24330.1	0.09827	0.07785	(0.0199	0.2548)	all1	349	352	348
OG0010585	AT4G37450.1	0.36024	0.20926	(0.0715	0.3406)	all1	209	240	206
OG0004093	AT5G13560.1	0.16205	0.22804	0.0078	0.0341	Ara1	679	721	671
OG0006387	AT1G32200.1	0.15099	0.1235	0.0052	0.0424	Ara1	459	505	456
OG0012691	AT3G03310.1	0.15511	0.04478	0.002	0.0442	all1	447	454	446
OG0016219	AT2G33680.1	0.22859	0.17318	0.0058	0.0338	all1	727	1328	724
OG0014478	AT1G76950.1	0.09387	0.05019	0.0019	0.0381	all1	1103	1139	1102
OG0014528	AT5G24030.1	0.17609	0.16555	0.0082	0.0497	all1	635	666	630
OG0009374	AT2G28600.1	0.31187	0.08814	0.008	0.0905	all1	502	713	482
OG0009224	AT3G58800.1	0.21829	0.21959	0.1986	(0.0639	all1	344	513	338
OG0019841	AT5G18290.1	0.18479	0.19821	A:0.21200	G:0.24703	variable	243	250	243
OG0009182	AT2G41990.1	0.13355	0.32451	0.2106	(0.0699	all1	297	391	297
OG0004640	AT1G60220.1	0.3795	0.28836	G:0.28395	0.207389	Ara1	584	653	560
OG0006404	AT5G42910.1	0.47715	0.38368	0.0185	0.0481	Ara1	370	376	307
OG0010356	AT1G64355.1	0.21335	0.58715	0.0177	0.0301	all1	199	204	197
OG0012112	AT2G19160.1	0.2346	0.29925	G:0.19797	position	all1	394	437	394
OG0012042	AT5G47390.1	0.0673	0.05274	(0.0131	0.2422)	all1	365	397	358
OG0004710	AT5G44800.1	0.21646	0.34543	0.0026	0.0075	Ara1	2223	2293	2175
OG0006554	AT3G54010.1	0.12003	0.15749	(0.0317	0.2019)	Ara1	635	643	625
OG0014950	AT1G19650.1	0.25346	0.02514	0.001	0.0394	all1	608	665	590
OG0012467	AT2G22410.1	0.1955	0.12867	0.0053	0.041	all1	681	701	605
OG0010623	AT5G19010.1	0.05143	0.0151	0.3091)	0.0365	all1	567	598	563
OG0004335	AT4G14820.1	0.3117	0.19422	A:0.20975	G:0.24225	Ara1	722	727	677
OG0006021	AT2G31810.1	0.20899	0.09644	0.0025	0.0256	Ara1	491	536	481
OG0004265	AT3G26140.1	0.23542	0.26111	0.2454	(0.0724	Ara1	508	1100	496
OG0014800	AT4G30550.1	0.19465	0.08998	0.0105	0.1161	all1	249	255	248
OG0012537	AT3G22400.1	0.10492	0.05137	(0.0165	0.3196)	all1	886	893	853
OG0010773	AT4G11860.1	0.22449	0.13776	0.028446	0.032398	all1	682	705	676
OG0019439	AT5G62520.1	0.17007	0.07631	0.0084	0.1101	variable	309	322	308
OG0010592	AT2G32580.1	0.16058	0.14111	(0.0523	0.3694)	all1	183	224	182
OG0004084	AT1G05070.1	0.23691	0.52052	0.0052	0.01	Ara1	184	191	182
OG0002718	AT1G55020.1	0.0851	0.14603	0.006	0.0411	Ara1	859	859	855
OG0006390	AT1G61040.1	0.10154	0.07344	(0.0020	0.0280)	Ara1	643	648	635
OG0012686	AT5G09805.1	0.44723	0.17828	Average	T:0.25430	all1	99	118	97
OG0009616	AT1G76400.1	0.13559	0.10876	0.0067	0.0617	all1	614	615	613
OG0019788	AT1G53930.1	0.75542	0.83051	0.0421	0.0506	variable	158	196	156
OG0009746	AT3G07790.1	0.0949	0.0655	(0.0185	0.2778)	all1	508	531	503
OG0019906	AT4G38000.1	0.25663	0.38638	0.0072	0.0187	variable	246	258	246
OG0009898	AT5G20630.1	0.1118	0.27036	A:0.21327	G:0.22117	all1	211	215	211
OG0009363	AT4G31850.1	0.13461	0.25956	0.0068	0.0261	all1	1112	1116	1113
OG0009233	AT2G14170.1	0.06204	0.05783	(0.0152	0.2614)	all1	607	607	527
OG0012958	AT5G55230.1	0.09887	0.13628	C:0.21160	A:0.28328	all1	587	611	587
OG0012808	AT4G11110.1	0.22874	0.23087	C:0.16994	A:0.28880	all1	1036	1119	1026
OG0014216	AT5G19420.1	0.10881	0.11338	(0.0235	0.2066)	all1	1105	1143	1098
OG0016052	AT5G38790.1	0.17819	0.22327	0.0212	0.0948	all1	131	169	104
OG0004388	AT3G23280.1	0.21573	0.16975	0.1138	(0.0203	Ara1	462	470	462
OG0002544	AT1G10170.1	0.21814	0.25155	A:0.28773	G:0.26390	variable	1188	2170	1133
OG0004873	AT5G07790.1	0.53232	0.35032	0.0173	0.0493	Ara1	616	661	600
OG0014346	AT1G09860.1	0.2161	0.1629	0.0035	0.0217	all1	383	397	379
OG0016102	AT1G21640.1	0.15731	0.08431	0.0024	0.029	all1	985	989	982
OG0010810	AT4G20130.1	0.10246	0.05985	0.0035	0.0591	all1	483	506	483
OG0014763	AT5G45910.1	0.27684	0.17086	A:0.30163	G:0.28261	all1	372	495	372
OG0016477	AT1G53290.1	0.10461	0.21601	0.0025	0.0114	variable	345	349	344
OG0010940	AT4G20150.1	0.09001	0.0001	0.3834)-1.0000	(0.0000	all1	81	88	81
OG0014633	AT3G55430.1	0.08456	0.09426	0.0057	0.0606	all1	449	466	449
OG0009825	AT2G20080.1	0.26236	0.06978	0.002	0.0286	all1	178	183	175
OG0009975	AT1G01200.1	0.13648	0.11676	(0.0468	0.4027)	all1	237	238	236
OG0006708	AT1G48840.1	0.16744	0.01486	0.0005	0.0349	Ara1	691	695	691
OG0014582	AT1G16880.1	0.13776	0.4728	0.0101	0.0213	all1	290	308	290
OG0006658	AT5G06530.1	0.09487	0.22537	A:0.25634	G:0.24299	Ara1	751	817	749
OG0016818	AT1G13400.1	0.36786	1.06271	0.0047	0.0044	Ara1	207	268	183
OG0004039	AT4G00060.1	0.27273	0.24473	G:0.20055	position	Ara1	1481	1579	1466
OG0006986	AT2G48090.1	0.4434	0.23877	0.0143	0.0598	variable	187	208	150
OG0004169	AT1G59890.1	0.27807	0.19085	A:0.30536	G:0.32321	Ara1	1162	1272	1122
OG0019735	AT1G09920.1	0.06225	0.05779	0.0043	0.0741	variable	192	197	196
OG0017125	AT3G10230.1	0.07904	0.18391	0.0908	(0.0178	Ara1	501	501	501
OG0015361	AT3G21200.1	0.19219	0.24632	0.013	0.0528	all1	317	335	311
OG0003433	AT3G13120.1	0.08824	999	0.0051	0	variable	191	198	181
OG0005904	AT1G02260.1	0.14108	0.08524	(0.0235	0.2743)	Ara1	502	523	498
OG0003563	AT2G19570.1	0.25868	0.31947	0.0159	0.0497	Ara1	301	349	299
OG0005854	AT1G11500.1	0.39487	0.41596	0.021	0.0505	Ara1	184	234	184
OG0001727	AT2G41150.2	0.10715	0.16222	0.115	(0.0339	variable	403	408	403
OG0017075	AT5G51120.1	0.09535	0.32384	0.0074	0.0227	Ara1	227	229	224
OG0015231	AT4G34830.1	0.26358	0.24473	0.0082	0.0336	all1	1089	1127	1073
OG0003146	AT5G55100.1	0.35464	0.49859	0.0072	0.0145	variable	843	908	661
OG0015614	AT3G10860.1	0.0419	0.0001	0.2197)-1.0000	(0.0000	all1	72	72	72
OG0017450	AT1G07745.1	0.2628	0.39731	0.0123	0.0309	variable	322	378	321
OG0011967	AT2G06850.1	0.06905	0.13766	0.0131	0.0955	all1	296	296	292
OG0013188	AT5G03870.1	0.1394	0.18397	(0.0440	0.2384)	all1	384	424	382
OG0015744	AT4G25270.1	0.18902	0.13181	0.0058	0.0443	all1	527	838	525
OG0017500	AT2G47320.1	0.23477	0.34386	G:0.12609	0.101112	Ara1	230	230	230
OG0011837	AT5G03880.1	0.09203	0.18509	0.107897	0.020355	all1	339	341	333
OG0008118	AT1G05150.1	0.05473	0.03947	0.036099	0.067484	Ara1	808	906	807
OG0008048	AT4G28706.3	0.22216	0.17674	(0.0482	0.2726)	Ara1	401	450	400
OG0013369	AT3G08560.1	0.11476	0.34701	0.1105	(0.0419	all1	235	235	235
OG0013239	AT3G52860.1	0.08753	0.1289	(0.0226	0.1745)	all1	156	156	156
OG0018337	AT3G01730.1	0.59301	0.6638	0.0185	0.0278	Ara1	87	94	84
OG0008952	AT1G65930.1	0.07811	0.07121	0.0045	0.0632	all1	410	458	410
OG0008802	AT1G21920.1	0.09758	0.0001	0.126849	0.02726	all1	417	433	415
OG0018267	AT5G65590.1	0.07266	0.04765	(((Ch:	0.004257,	Ara1	316	331	315
OG0018642	AT5G52552.1	0.37285	0.44843	0.02	0.0447	Ara1	360	383	244
OG0011458	AT3G07050.1	0.20041	0.23866	0.1726	(0.0440	all1	582	594	571
OG0003782	AT1G16540.1	0.2586	0.38063	0.0032	0.0084	Ara1	819	884	819
OG0015180	AT3G56640.1	0.05105	0.12256	0.0028	0.0229	all1	790	851	790
OG0011508	AT2G01810.1	0.43179	0.48651	0.0111	0.0229	all1	697	717	691
OG0001844	AT1G80190.1	0.06379	0.0001	0.099208	0.027989	Ara1	201	214	201
OG0007573	AT3G02970.1	0.32773	0.44516	0.0134	0.0301	Ara1	332	896	327
OG0005737	AT3G49910.1	0.02041	0.0001	0.1274)-1.0000	(0.0000	Ara1	146	146	146
OG0013065	AT2G03450.1	0.16209	0.0889	0.0073	0.082	all1	651	657	649
OG0011221	AT4G35420.1	0.14053	0.23192	Average	T:0.27550	all1	326	341	317
OG0013135	AT3G15990.1	0.12358	0.10813	(0.0055	0.0505)	all1	653	658	654
OG0011371	AT4G34340.1	0.17058	0.19143	C:0.17746	A:0.28451	Ara1	353	357	355
OG0001914	AT2G36490.1	0.29052	0.34785	0.0234	0.0672	variable	1393	1721	1334
OG0007423	AT2G36990.1	0.15246	0.1251	(0.0395	0.3143)	Ara1	547	554	546
OG0005667	AT1G67570.1	0.12429	0.07621	0.031045	0.165142	Ara1	456	470	448
OG0008580	AT4G01450.1	0.32621	0.10683	0.2848)	0.3525	Ara1	343	362	343
OG0011754	AT3G11920.1	0.21154	0.13981	0.011	0.0785	all1	630	681	553
OG0015827	AT3G15770.1	0.28937	0.02355	0.090906	0.074163	all1	162	184	158
OG0013510	AT2G40300.1	0.18445	0.0001	0.123031	0.012181	all1	259	318	257
OG0017198	AT5G15440.1	0.0867	0.08438	0.0877	(0.0260	Ara1	293	298	298
OG0005242	AT5G53490.1	0.09845	0.12094	0.0088	0.0727	Ara1	236	241	235
OG0007006	AT5G12000.1	0.20529	0.37233	0.0151	0.0406	Ara1	701	874	647
OG0007156	AT5G17450.1	0.03629	0.0001	0.1571)	0.0293	Ara1	149	149	149
OG0011604	AT5G21080.1	0.14061	0.20119	0.0079	0.0391	all1	1025	1041	679
OG0015977	AT4G14540.1	0.03014	0.04144	0.0028	0.0674	all1	161	222	157
OG0013440	AT2G18876.1	0.07869	0.11675	A:0.34139	G:0.28399	all1	382	389	377
OG0008761	AT3G24730.1	0.13941	0.04301	0.3851)	0.1207	all1	159	159	151
OG0008631	AT1G17420.1	0.09958	0.08619	0.112877	0.024422	all1	919	922	919
OG0005486	AT2G35040.1	0.13115	0.6251	0.0067	0.0107	Ara1	596	649	596
OG0015518	AT1G16970.1	0.1741	0.05533	0.0014	0.0252	all1	621	624	573
OG0011190	AT1G13300.1	0.16044	0.12862	(0.0261	0.2011)	all1	344	370	341
OG0013284	AT1G54610.1	0.08656	0.09231	(0.0224	0.2417)	variable	572	579	560
OG0015448	AT5G67250.1	0.19427	0.06533	0.028034	0.049732	all1	527	1132	530
OG0007792	AT4G36730.1	0.16734	0.19654	0.1245	(0.0195	Ara1	315	332	315
OG0018871	AT1G78440.1	0.28823	0.72044	0.0097	0.0134	variable	329	339	330
OG0008214	AT2G42880.1	0.04578	0.06264	(0.0187	0.2940)	Ara1	606	616	606
OG0008344	AT3G01420.1	0.22934	0.12455	2.15924	0.229344	variable	639	639	639
OG0018921	AT1G48040.1	0.10992	0.15664	0.040278	0.1059	variable	383	385	383
OG0011949	AT1G35780.1	0.16028	0.32948	G:0.24160	0.380695	all1	286	293	284
OG0003168	AT3G59550.1	0.42087	0.54638	0.0252	0.0461	variable	693	740	679
OG0011819	AT5G17210.1	0.42	0.52212	0.01	0.0192	all1	209	231	212
OG0008136	AT5G50440.1	0.08733	0.06034	0.014604	0.058537	Ara1	219	220	219
OG0008443	AT1G08470.1	0.1058	0.10616	(0.0231	0.2164)	all1	390	390	390
OG0008513	AT4G03210.1	0.0632	0.08019	(0.0271	0.3384)	all1	290	293	290
OG0007095	AT3G25400.1	0.1561	0.0001	0.0472)	lnL(ntime:	Ara1	141	143	135
OG0013583	AT2G28690.1	0.15955	0.0897	(0.0289	0.3205)	all1	231	247	230
OG0011697	AT2G39360.1	0.2101	0.25451	(0.0619	0.2424)	all1	815	845	809
OG0005381	AT2G01760.1	0.25605	0.23839	0.3066	(0.0713	Ara1	382	433	372
OG0007324	AT1G32580.1	0.13992	0.2306	C:0.26638	A:0.31004	Ara1	229	229	229
OG0005160	AT5G01230.1	0.04076	0.0001	0.052577	0.011147	Ara1	309	363	309
OG0013632	AT1G10720.1	0.17748	0.24669	G:0.37890	position	all1	429	469	427
OG0011476	AT3G47640.1	0.16266	0.12655	0.0072	0.0572	Ara1	240	328	236
OG0013762	AT2G26580.2	0.19307	0.26129	0.0027	0.0102	Ara1	164	167	164
OG0017811	AT4G12730.1	0.11486	0.05836	0.6125)	0.157055	Ara1	403	404	402
OG0011526	AT1G32415.1	0.19883	0.17461	(0.0156	0.0891)	all1	761	896	757
OG0007274	AT4G08230.1	0.1217	0.04853	0.8066)	0.094045	Ara1	113	117	101
OG0005030	AT1G30320.1	0.22058	0.36112	0.0135	0.0374	Ara1	509	531	482
OG0011103	AT4G27550.1	0.19722	0.18237	A:0.29427	G:0.32229	all1	795	808	785
OG0013347	AT5G40740.1	0.08244	0.14067	(0.0213	0.1510)	all1	741	744	741
OG0003922	AT1G08630.2	0.10037	0.32502	0.122191	0.086239	Ara1	358	373	358
OG0005415	AT1G01920.2	0.29954	0.15405	0.2061	(0.0470	Ara1	572	601	522
OG0007651	AT1G79470.1	0.10127	0.05761	0.0024	0.0419	Ara1	503	503	503
OG0003872	AT1G03310.2	0.23767	0.17564	(0.0539	0.3063)	Ara1	882	891	881
OG0005545	AT2G22480.1	0.10724	0.15461	0.0036	0.0231	Ara1	537	545	534
OG0011053	AT4G32260.1	0.07824	0.03547	0.0026	0.0739	all1	219	227	218
OG0013217	AT5G35370.1	0.17902	0.20114	A:0.25772	G:0.24614	all1	872	1576	871
OG0008287	AT5G48150.1	0.06816	0.0001	0.146809	0.033824	Ara1	490	1225	485
OG0018249	AT3G03510.1	0.37029	0.39299	0.0144	0.0367	Ara1	455	536	459
OG0018560	AT1G43040.1	0.12536	0.14639	0.0045	0.0307	Ara1	104	147	103
OG0018430	AT5G13700.1	0.12912	0.11312	(0.0522	0.4601)	variable	472	476	471
OG0007028	AT5G60370.1	0.21653	0.34015	0.0078	0.0228	Ara1	413	418	406
OG0015809	AT1G20880.1	0.19169	0.17822	0.0052	0.0289	all1	274	316	273
OG0015959	AT5G67470.1	0.14258	0.13764	0.0091	0.0664	all1	899	935	890
OG0007178	AT5G25170.1	0.06997	0.01873	0.4591)	0.0492	Ara1	218	219	218
OG0015687	AT2G34940.1	0.26417	0.32361	(((Ch:	0.016119,	all1	618	641	616
OG0005719	AT4G18460.1	0.12732	0.04578	0.2325)	0.1795	Ara1	153	234	153
OG0005649	AT1G64625.1	0.26776	0.41423	0.0174	0.042	Ara1	527	1133	507
OG0018145	AT1G15385.1	0.24826	0.0001	0.035663	0.010852	Ara1	73	104	72
OG0017772	AT2G25250.1	0.35752	0.19756	0.0089	0.0452	Ara1	155	240	132
OG0015536	AT1G27480.1	0.27875	0.25492	(0.0529	0.2078)	all1	432	478	432
OG0013801	AT4G00500.1	0.17548	0.27146	G:0.25435	Average	Ara1	460	462	460
OG0003264	AT4G32030.1	0.27812	0.27565	C:0.20350	A:0.23895	Ara1	253	330	232
OG0003334	AT1G54217.1	0.24591	0.44319	0.006	0.0134	Ara1	102	145	101
OG0001170	AT3G56060.1	0.2154	0.32526	0.0156	0.048	variable	577	584	540
OG0017622	AT4G30100.1	0.1637	0.13533	A:0.25558	G:0.21786	variable	1311	1349	1300
OG0015466	AT2G30200.1	0.14524	0.09015	0.2022	(0.0134	all1	393	394	388
OG0013951	AT1G34110.1	0.08106	0.0414	0.044651	0.082684	all1	1072	1128	1053
OG0008891	AT3G23740.1	0.43069	0.48227	0.042729	0.073304	all1	566	713	519
OG0018781	AT3G04070.1	0.21136	0.23441	C:0.18286	A:0.32571	Ara1	359	376	350
OG0007862	AT5G22010.1	0.17283	0.17395	0.1604	(0.0204	Ara1	956	1072	958
OG0003711	AT1G67140.1	0.27642	0.2502	G:0.17767	0.117129	Ara1	2221	2366	1637
OG0007399	AT5G26150.1	0.17265	0.13637	(0.0296	0.2179)	Ara1	706	726	691
OG0015043	AT2G40475.1	0.30543	0.27428	0.0142	0.0518	all1	193	279	191
OG0017207	AT1G03190.1	0.06494	0.05226	0.0018	0.034	Ara1	758	758	758
OG0015113	AT1G24100.1	0.19575	0.15749	0.122754	0.018674	all1	460	463	461
OG0007932	AT1G50730.1	0.3693	0.27739	G:0.21846	position	Ara1	923	1102	890
OG0003641	AT5G45710.1	0.14395	1.82805	0.0085	0.0046	Ara1	345	512	341
OG0000793	AT1G36095.1	0.0556	999	0.6147	0.0006	variable	301	437	10
OG0014285	AT1G07160.1	0.2517	0.07793	0.0033	0.0426	all1	380	389	250
OG0012449	AT3G15780.1	0.42208	0.70251	0.0191	0.0272	all1	117	131	113
OG0012519	AT2G38860.2	0.18982	0.14479	0.0101	0.0695	all1	389	399	396
OG0016191	AT4G30610.1	0.17846	0.0201	0.2073)	0.0989	all1	465	470	465
OG0009589	AT3G24520.1	0.10285	0.07411	0.0097	0.131	all1	330	346	311
OG0019032	AT4G35590.1	0.35158	0.47121	0.0248	0.0526	variable	370	409	323
OG0010378	AT1G72330.1	0.15802	0.16317	0.098796	0.037017	all1	540	548	536
OG0010883	AT1G48120.1	0.25143	0.37449	0.0039	0.0105	variable	1340	1429	1200
OG0010228	AT2G41560.1	0.12273	0.07718	(0.0190	0.2450)	all1	1030	1061	1030
OG0014441	AT3G14770.1	0.20755	0.04908	0.1570)	0.237135	all1	236	303	236
OG0012976	AT5G06390.1	0.11732	0.12328	0.0034	0.0273	Ara1	458	465	457
OG0014511	AT2G14910.1	0.2034	0.14221	(0.0444	0.3126)	all1	386	450	264
OG0012826	AT1G32560.1	0.3181	0.10648	0.0065	0.0612	Ara1	134	165	129
OG0010199	AT2G18390.1	0.02336	0.0001	0.1949)	0.0561	all1	185	185	185
OG0006915	AT1G52630.1	0.12672	0.10741	(0.0199	0.1848)	Ara1	439	975	438
OG0016370	AT3G01460.1	0.31633	0.14139	0.0052	0.0365	all1	2176	2193	2172
OG0014134	AT3G09230.1	0.42481	0.42547	0.0184	0.0432	all1	393	419	382
OG0016220	AT1G79380.1	0.16584	0.19199	0.1665	(0.0280	all1	401	427	398
OG0014064	AT2G23390.1	0.12078	0.04123	0.0018	0.0443	all1	469	699	464
OG0006845	AT1G10650.2	0.20198	0.04168	0.2309)	0.1675	Ara1	339	350	327
OG0009638	AT5G17660.1	0.2758	0.05071	0.2332)	0.2642	all1	312	333	305
OG0009041	AT1G10200.1	0.05229	1.45898	0.0023	0.0016	all1	190	190	189
OG0009111	AT1G20070.1	0.38566	0.18901	0.0025	0.0134	all1	193	197	192
OG0012181	AT3G02740.1	0.22543	0.52559	0.0107	0.0204	all1	488	493	483
OG0016509	AT5G07150.1	0.52125	0.26818	G:0.30040	Average	variable	555	628	539
OG0006497	AT4G09150.1	0.1776	0.16296	0.0027	0.0168	Ara1	1097	1103	1074
OG0004783	AT5G61550.1	0.13658	0.16339	0.0183	0.1117	variable	845	1715	846
OG0010295	AT3G23340.1	0.11555	0.07403	0.0031	0.0413	all1	442	446	439
OG0014238	AT1G09830.1	0.20836	0.21506	A:0.23048	G:0.20952	all1	532	837	525
OG0014893	AT5G08400.1	0.13352	0.08525	(0.0236	0.2754)	all1	333	335	287
OG0014368	AT4G39745.1	0.30595	0.88147	0.0106	0.0121	all1	253	733	261
OG0009534	AT1G14160.1	0.33287	0.32941	(0.1058	0.3212)	all1	209	254	210
OG0009464	AT3G04010.1	0.16108	0.06252	0.07553	0.034273	all1	491	565	493
OG0004017	AT1G64570.1	0.38787	0.31782	(0.0522	0.1637)	Ara1	1239	1288	1193
OG0006253	AT1G19840.1	0.14324	0.20935	A:0.23179	G:0.27373	Ara1	153	156	151
OG0014189	AT1G22800.1	0.11062	0.15464	0.0072	0.0469	all1	355	390	355
OG0016836	AT2G38270.1	0.16368	0.10493	0.0059	0.0564	Ara1	293	296	292
OG0010501	AT1G32400.1	0.18164	0.16547	0.0129	0.078	all1	280	285	280
OG0012745	AT2G01730.1	0.17636	0.17779	0.2849	(0.0435	all1	613	973	586
OG0016966	AT3G02310.1	0.22638	0.05145	0.0019	0.0367	Ara1	250	251	250
OG0010451	AT4G31420.1	0.1457	0.05813	0.3349)	0.1837	all1	404	441	402
OG0012615	AT5G04520.1	0.13833	0.21427	0.0097	0.0454	all1	291	293	291
OG0006303	AT3G03270.1	0.21936	0.26631	Average	T:0.26625	Ara1	201	201	159
OG0009685	AT2G01340.1	0.15202	0.39399	0.1721	(0.0704	all1	215	229	196
OG0012230	AT1G67110.1	0.08019	0.04281	0.0026	0.0615	all1	512	513	510
OG0010074	AT1G80130.1	0.35645	0.36935	0.0131	0.0355	all1	305	317	299
OG0006726	AT1G43690.1	0.18426	0.38805	0.2192	(0.0689	Ara1	599	618	578
OG0002855	AT3G18400.1	0.17633	0.1609	0.090749	0.023437	Ara1	314	326	308
OG0004562	AT1G17750.1	0.35433	0.23292	0.3895	(0.0526	Ara1	1088	1117	1079
OG0004432	AT3G44590.1	0.19622	0.36506	0.004	0.0111	Ara1	111	144	108
OG0012360	AT5G59420.1	0.11358	1.01382	0.0045	0.0044	all1	457	458	454
OG0010124	AT4G34750.1	0.1284	0.13211	0.0081	0.0612	Ara1	150	160	144
OG0010829	AT5G63840.1	0.09121	0.08149	0.0047	0.0577	all1	921	921	921
OG0012196	AT4G10440.1	0.09369	0.03814	0.4438)	0.1019	all1	633	642	628
OG0006480	AT4G38650.1	0.23132	0.29757	G:0.30521	position	Ara1	562	564	557
OG0010979	AT1G08780.1	0.06133	83.87	0.0129	0.0002	all1	129	130	129
OG0009056	AT3G21360.1	0.12398	0.01255	(((Ch:	0.005540,	all1	330	579	327
OG0019098	AT5G23950.1	0.24857	0.17612	0.0201	0.114	variable	219	285	239
OG0009106	AT3G06540.1	0.2912	0.16982	0.0031	0.0185	all1	563	577	549
OG0009523	AT3G03200.1	0.19831	0.07136	0.0024	0.0332	all1	479	516	479
OG0009473	AT3G57830.1	0.20301	0.19946	0.1343	(0.0507	all1	662	693	653
OG0014884	AT5G32470.1	0.19322	0.27801	G:0.32520	position	all1	617	619	615
OG0009692	AT5G67550.1	0.25873	0.15876	(0.0495	0.3103)	all1	509	518	509
OG0006244	AT2G31082.1	0.36958	999	0.0069	0	variable	86	103	65
OG0012752	AT5G24490.1	0.15334	0.07061	1.87621	0.153336	all1	308	367	304
OG0016821	AT1G33475.1	0.2814	0.23803	Average	T:0.28389	Ara1	255	493	256
OG0010516	AT1G77260.1	0.16155	0.07631	0.0063	0.0828	all1	655	1170	655
OG0012602	AT3G01780.1	0.0561	0.03437	(0.0034	0.0981)	all1	1176	1318	1172
OG0016971	AT5G16250.1	0.06681	0.13836	(0.0295	0.2139)	variable	183	187	183
OG0010446	AT3G52630.2	0.22179	0.0001	0.182201	0.006337	all1	107	108	107
OG0006314	AT5G05680.1	0.24931	0.44654	0.0047	0.0105	variable	810	851	801
OG0004150	AT4G12750.1	0.26535	0.2389	0.2377	(0.0548	Ara1	1117	1167	1094
OG0010063	AT1G30460.1	0.14066	0.07281	0.0019	0.0265	all1	631	689	631
OG0012227	AT1G02340.1	0.44738	1.30216	0.0126	0.0097	all1	292	541	274
OG0006731	AT4G21320.1	0.07132	0.10273	0.0045	0.0442	variable	286	321	286
OG0002912	AT3G08840.2	0.38051	0.25839	Average	T:0.27997	Ara1	519	982	837
OG0004425	AT3G59290.1	0.32657	0.24402	0.0145	0.0593	Ara1	1024	1170	946
OG0006661	AT3G03970.1	0.36855	0.32364	G:0.16968	position	Ara1	554	561	555
OG0010133	AT2G29510.1	0.22077	0.24102	(0.0387	0.1605)	all1	839	923	830
OG0012377	AT3G14350.1	0.13081	0.14982	(0.0100	0.0662)	all1	717	961	716
OG0006148	AT3G01490.1	0.0588	0.02284	(0.0032	0.1440)	Ara1	411	414	406
OG0014969	AT1G15200.1	0.24143	0.17727	0.0087	0.0489	all1	423	430	420
OG0014292	AT1G14900.1	0.27937	0.13827	0.0152	0.1102	all1	204	225	189
OG0016186	AT4G16180.1	0.13497	0.0001	0.065737	0.002029	all1	273	922	820
OG0014839	AT5G45700.1	0.13767	0.09825	0.0065	0.0658	all1	272	290	268
OG0006018	AT2G11810.1	0.11027	0.10261	(0.0443	0.4262)	variable	465	467	459
OG0010894	AT5G08740.1	0.20268	0.15492	A:0.28571	G:0.20849	all1	519	554	519
OG0004679	AT3G24090.1	0.0587	0.0001	0.031482	0.045055	variable	677	739	678
OG0004729	AT1G23480.1	0.1242	0.03631	0.2174)	0.1296	Ara1	556	558	547
OG0019025	AT4G18980.1	0.43574	0.80975	0.0495	0.0611	variable	106	159	108
OG0016612	AT2G47450.1	0.20967	0.18924	(0.0847	0.4483)	Ara1	373	427	363
OG0012961	AT4G25220.1	0.07858	0.50743	0.01	0.0197	Ara1	504	507	503
OG0002304	AT1G01580.1	0.22266	0.3327	G:0.24758	position	variable	725	730	723
OG0004498	AT2G26330.1	0.07093	0.0623	(0.0234	0.3725)	Ara1	976	979	976
OG0002254	AT3G62050.1	0.50743	0.40647	0.0251	0.0617	variable	157	584	122
OG0014506	AT5G27670.1	0.08796	0.14387	A:0.24828	G:0.22759	all1	150	160	146
OG0012831	AT5G19160.1	0.25793	0.71266	0.0111	0.0156	all1	464	472	461
OG0006902	AT5G45040.1	0.27595	0.55921	0.0173	0.031	variable	175	216	174
OG0014123	AT1G08490.1	0.13469	0.04839	0.073951	0.025422	all1	463	468	466
OG0016367	AT1G45474.1	0.17226	0.11208	0.0028	0.0252	all1	256	263	256
OG0014073	AT3G15150.1	0.22172	0.14233	0.0074	0.0517	all1	249	249	249
OG0016237	AT4G27790.1	0.22799	0.11253	(0.0391	0.3483)	all1	345	356	344
OG0006852	AT4G21060.1	0.20556	0.2343	0.0072	0.0309	Ara1	741	770	677
OG0005980	AT5G44780.1	0.40141	0.24763	G:0.29549	0.186491	Ara1	723	779	660
OG0013529	AT1G31320.1	0.09325	0.0001	0.142477	0.027279	all1	172	175	172
OG0013479	AT5G64950.1	0.43676	0.86522	0.0132	0.0153	all1	391	812	311
OG0018577	AT5G05330.1	0.21418	0.18275	0.015	0.0821	Ara1	220	224	187
OG0018427	AT2G32030.1	0.26077	0.1599	G:0.31818	0.075655	Ara1	188	190	185
OG0018002	AT1G79830.1	0.2507	0.21941	0.0077	0.0351	variable	956	1042	956
OG0015690	AT2G42590.2	0.09424	0.0001	0.071063	4e-06	all1	263	367	263
OG0011218	AT1G15290.1	0.38567	0.48481	0.0124	0.0255	all1	1608	1653	1543
OG0003092	AT4G16710.1	0.17406	0.0389	0.3098)	0.1101	variable	176	178	175
OG0011348	AT2G16700.1	0.09853	0.0265	0.5174)	0.056	all1	143	160	143
OG0018848	AT2G23640.1	0.37005	0.56176	0.015	0.0267	variable	206	257	142
OG0015521	AT4G34060.1	0.29948	0.23851	0.0332	0.1391	all1	1044	1239	1001
OG0013816	AT5G22350.1	0.14856	0.36252	0.0071	0.0196	all1	427	429	427
OG0003273	AT1G78770.1	0.07134	0.16344	0.059498	0.015469	Ara1	543	602	543
OG0003988	AT4G03560.1	0.19752	0.04176	0.016203	0.033156	Ara1	733	745	701
OG0003323	AT1G17580.1	0.20627	0.26876	C:0.18863	A:0.31037	Ara1	1520	1570	1495
OG0015471	AT4G28190.1	0.0823	0.15928	0.0111	0.0697	all1	237	273	236
OG0013946	AT4G30010.1	0.09854	0.13246	0.0247	0.1866	all1	90	152	90
OG0017635	AT5G21960.1	0.2185	0.12372	(((Ch:	0.061103,	Ara1	216	232	210
OG0003706	AT2G18760.1	0.19678	0.90632	0.0065	0.0072	Ara1	1187	1515	1168
OG0007875	AT5G56510.1	0.20541	0.20039	A:0.30537	G:0.20694	Ara1	596	643	596
OG0013698	AT4G27330.1	0.43784	0.73046	0.0328	0.0449	all1	314	345	291
OG0017210	AT5G45540.1	0.42782	0.83338	0.0252	0.0302	Ara1	803	828	779
OG0015054	AT5G24240.1	0.25227	0.1199	0.0062	0.0518	all1	574	575	570
OG0017340	AT4G38180.1	0.10987	0.10535	0.0049	0.0467	variable	788	851	782
OG0015104	AT3G17611.1	0.10749	0.08096	0.0045	0.0554	all1	334	335	335
OG0003656	AT1G61660.1	0.23933	0.0001	0.151471	0.004606	Ara1	393	402	392
OG0007925	AT5G54580.1	0.10335	0.0001	0.073502	0.029115	variable	156	177	156
OG0008758	AT5G26010.1	0.23725	0.14369	0.0047	0.0324	all1	331	346	330
OG0008608	AT2G20875.1	0.16358	0.0001	0.0572)	lnL(ntime:	all1	104	170	103
OG0018796	AT1G08320.1	0.09773	0.0001	0.066773	4e-06	variable	481	492	482
OG0008121	AT2G20940.1	0.10649	999	0.0078	0	Ara1	129	157	129
OG0008071	AT4G00650.1	0.3386	0.35625	0.0169	0.0475	Ara1	314	691	288
OG0017469	AT5G02060.1	0.13022	0.21319	0.0119	0.0559	Ara1	152	152	152
OG0017539	AT2G23840.1	0.17517	0.17122	0.0125	0.0727	Ara1	284	294	282
OG0007082	AT1G27360.1	0.47138	0.98779	0.0183	0.0185	Ara1	393	397	388
OG0013594	AT3G20150.1	0.23332	0.37335	G:0.16226	0.099206	all1	1114	1171	1106
OG0015358	AT4G08330.1	0.11994	0.15925	0.0109	0.0686	all1	164	171	161
OG0015208	AT5G26940.1	0.2086	0.43243	0.0207	0.0479	all1	316	388	315
OG0011680	AT1G13290.1	0.19868	0.16862	C:0.20266	A:0.40532	all1	302	313	301
OG0005396	AT5G57860.3	0.22802	0.0001	0.028966	0.055256	Ara1	95	149	95
OG0008454	AT3G48010.1	0.08374	0.06452	(0.0233	0.3617)	all1	705	711	704
OG0008504	AT2G31440.1	0.16744	0.06097	(0.0090	0.1482)	all1	250	286	250
OG0005177	AT1G13590.1	0.35871	0.23674	0.0189	0.08	Ara1	87	90	68
OG0007333	AT5G57000.2	0.30981	0.35876	0.0177	0.0492	Ara1	187	210	172
OG0017956	AT1G79130.1	0.21453	0.12034	0.0075	0.0621	Ara1	134	139	128
OG0011461	AT2G36630.1	0.15998	0.40243	0.0092	0.0228	all1	459	467	459
OG0013625	AT1G74830.1	0.22138	0.31536	0.126917	0.027888	all1	542	560	525
OG0017806	AT5G59480.1	0.23832	0.19903	A:0.30851	G:0.21277	Ara1	282	283	282
OG0011531	AT5G51110.1	0.14455	0.01673	0.015726	0.014542	all1	220	265	219
OG0013775	AT2G18650.1	0.2878	0.39986	0.0136	0.034	all1	423	485	397
OG0007998	AT1G77010.1	0.21865	0.49261	0.0118	0.0239	Ara1	695	703	675
OG0005027	AT1G54170.1	0.36353	0.4764	(0.0561	0.1177)	Ara1	587	649	564
OG0007263	AT3G45620.1	0.13125	0.1448	0.0111	0.0766	Ara1	481	520	478
OG0008290	AT5G22270.1	0.24977	0.0001	0.45542	0.040513	Ara1	93	104	92
OG0013350	AT5G25380.1	0.31198	0.24309	0.0086	0.0353	all1	437	452	416
OG0011114	AT4G36380.1	0.13441	0.23186	A:0.25311	G:0.27593	all1	524	537	482
OG0007646	AT3G59710.1	0.29224	0.07264	0.005	0.0694	Ara1	302	312	281
OG0003935	AT1G01060.3	0.32604	0.12547	0.0044	0.0347	Ara1	645	721	628
OG0005402	AT5G16650.1	0.12886	0.0001	0.06344	0.154542	Ara1	128	156	128
OG0007716	AT2G36650.1	0.35077	0.46269	0.0194	0.042	Ara1	373	409	348
OG0003865	AT2G27550.1	0.04052	999	0.0002	0	variable	175	175	175
OG0005552	AT5G66850.1	0.16115	0.08872	0.127023	0.07359	Ara1	716	745	706
OG0013200	AT5G20190.1	0.17364	0.03315	0.2469)	0.165916	all1	290	297	287
OG0011044	AT3G61300.1	0.29599	0.20712	0.142648	0.034766	all1	972	1016	741
OG0005302	AT1G68170.1	0.35724	0.22172	0.2192	(0.0474	variable	356	381	344
OG0007146	AT4G16570.1	0.28475	0.15826	0.0095	0.0602	variable	724	737	719
OG0011614	AT1G73480.1	0.17204	0.14645	0.0059	0.0406	all1	463	503	409
OG0015967	AT4G29100.1	0.17425	0.11593	0.1657	(0.0180	all1	407	419	339
OG0013450	AT1G27695.1	0.29059	0.07192	0.0057	0.0787	Ara1	91	91	90
OG0011744	AT2G25080.1	0.12984	0.54581	0.061946	0.157808	all1	236	236	234
OG0015837	AT1G76010.1	0.15789	0.26742	G:0.20261	0.116287	Ara1	350	367	307
OG0005252	AT3G05300.1	0.25227	0.0001	0.017493	0.0217	Ara1	113	296	112
OG0007016	AT3G50610.1	0.30412	0.49071	0.0147	0.03	Ara1	229	246	194
OG0008590	AT1G05820.1	0.27661	0.26246	(0.0538	0.2050)	all1	536	542	535
OG0013125	AT1G52320.2	0.18631	0.18047	(0.0397	0.2198)	all1	775	834	744
OG0011361	AT3G63110.1	0.14038	0.40282	0.0144	0.0358	all1	336	339	336
OG0007433	AT1G77130.1	0.10122	0.17233	0.0066	0.0382	Ara1	618	628	618
OG0005677	AT4G15890.1	0.19134	0.13752	0.0053	0.0386	Ara1	1314	1361	1307
OG0007563	AT3G66652.1	0.53176	0.83561	0.0253	0.0303	Ara1	997	1062	616
OG0005727	AT1G57610.2	0.10713	0.07785	0.4134)	0.1658	Ara1	293	306	284
OG0013075	AT5G58620.1	0.13501	0.09304	0.006	0.064	all1	607	638	605
OG0011231	AT2G36570.1	0.13079	0.25681	C:0.22222	A:0.25178	all1	672	680	654
OG0008354	AT1G12880.1	0.26397	0.12062	0.0027	0.0224	variable	203	317	202
OG0018861	AT1G53345.1	0.15399	0.56513	0.016	0.0284	variable	325	802	337
OG0008204	AT1G60650.1	0.30853	0.16969	A:0.28571	G:0.31793	Ara1	292	402	274
OG0013294	AT1G26820.1	0.13376	0.12583	0.0064	0.051	all1	222	408	222
OG0015458	AT1G25375.1	0.45808	0.21395	0.0134	0.0628	all1	524	806	518
OG0007782	AT1G56260.1	0.22058	0.0001	0.116746	0.075417	Ara1	127	130	126
OG0005496	AT3G27530.1	0.11607	0.00481	0.137094	0.044763	Ara1	914	963	912
OG0015508	AT5G60920.1	0.0753	0.01531	0.2880)	0.0689	all1	456	456	456
OG0011180	AT2G41250.1	0.10962	0.19611	0.0028	0.0141	all1	290	365	288
OG0017239	AT4G03230.1	0.20408	0.14461	0.3344	(0.0320	Ara1	1010	1021	869
OG0008621	AT3G60070.1	0.09108	0.16366	0.0099	0.0605	all1	458	519	453
OG0008771	AT3G10040.1	0.13645	0.10633	0.009	0.0849	all1	431	473	405
OG0008058	AT3G49330.1	0.09788	0.14725	0.0092	0.0625	Ara1	186	189	186
OG0008108	AT2G01450.1	0.03597	0.0001	0.0648)	lnL(ntime:	Ara1	486	587	485
OG0013198	AT1G08280.1	0.17017	0.17416	(0.0624	0.3579)	Ara1	398	402	395
OG0015754	AT4G11980.1	0.18158	0.08226	0.0061	0.0743	all1	309	356	301
OG0017510	AT4G12250.1	0.02714	0.07246	0.0024	0.0326	Ara1	436	443	436
OG0011827	AT3G46450.1	0.2249	0.29203	0.0057	0.0196	all1	486	504	483
OG0003006	AT2G32788.1	0.44683	0.0001	0.319505	4e-06	variable	64	70	63
OG0015604	AT3G06270.1	0.03829	0.02817	(0.0088	0.3038)	all1	348	352	348
OG0017440	AT1G73880.1	0.22836	0.23231	G:0.35729	position	Ara1	473	494	473
OG0011977	AT5G24110.1	0.26727	0.34262	C:0.22442	A:0.23432	all1	303	341	303
OG0003573	AT3G49000.1	0.29015	0.18457	0.0205	0.1109	variable	523	541	521
OG0005844	AT4G00990.1	0.41526	0.6918	0.0202	0.0292	Ara1	840	1306	767
OG0017065	AT1G55740.1	0.11185	0.0507	0.0019	0.0373	Ara1	754	781	755
OG0015221	AT1G50920.1	0.10705	0.10198	(0.0224	0.2181)	all1	671	694	671
OG0017135	AT1G25400.1	0.30787	0.20409	0.0112	0.0547	Ara1	288	348	268
OG0015371	AT5G15110.1	0.15072	0.0677	(0.0156	0.2295)	all1	472	518	471
OG0003423	AT2G25740.1	0.27669	0.36773	C:0.16117	A:0.26190	Ara1	547	558	546
OG0005914	AT4G16460.1	0.36106	0.17293	C:0.16149	A:0.32298	Ara1	176	229	161
OG0015190	AT5G27000.1	0.18217	0.38101	0.0067	0.0176	all1	987	1024	967
OG0011518	AT2G18260.1	0.11985	0.06265	0.0028	0.0439	all1	305	372	305
OG0011448	AT3G17790.1	0.09799	0.10332	0.0091	0.0885	all1	338	339	322
OG0017284	AT3G13520.1	0.25294	0.17716	0.0165	0.0929	Ara1	60	91	60
OG0003792	AT1G31910.1	0.21857	0.20361	C:0.18526	A:0.26096	variable	505	536	502
OG0018702	AT1G73165.1	0.32624	0.47853	0.0109	0.0228	variable	74	78	73
OG0018652	AT3G54360.1	0.15408	0.1371	1.74205	0.15408	Ara1	405	418	403
OG0008812	AT3G08970.1	0.20089	0.28454	0.0055	0.0193	all1	572	582	567
OG0018277	AT1G68350.1	0.38334	0.0778	0.1344)	0.7606	Ara1	162	166	158
OG0008942	AT1G70560.1	0.14007	0.0001	0.088115	0.024201	all1	391	423	389
OG0013229	AT5G67200.1	0.09238	0.09071	(0.0263	0.2913)	all1	669	684	660
OG0013379	AT3G57130.1	0.11664	0.14924	(0.0411	0.2746)	all1	467	475	466
OG0010950	AT4G30510.1	0.14084	0.15501	(0.0225	0.1455)	all1	366	430	348
OG0014623	AT1G09060.2	0.25969	0.48069	0.022	0.0458	all1	930	959	920
OG0010800	AT1G04700.1	0.21627	0.24284	(0.0431	0.1771)	all1	1042	1060	1040
OG0014773	AT3G02800.1	0.16882	793.313	0.0065	0	all1	203	205	200
OG0002404	AT4G14301.1	0.39227	0.30949	0.0329	0.1063	variable	132	192	123
OG0004933	AT3G58730.1	0.07255	0.03439	0.0017	0.0496	Ara1	261	275	261
OG0014356	AT1G31310.1	0.12588	0.15029	C:0.21842	A:0.32895	Ara1	383	438	380
OG0016112	AT3G06100.1	0.12986	0.48631	0.0089	0.0184	all1	275	286	273
OG0014206	AT1G24625.1	0.2042	0.15248	0.0112	0.0733	all1	209	220	201
OG0016042	AT5G48440.1	0.2191	0.22574	A:0.29111	G:0.20216	all1	459	463	458
OG0004398	AT1G01880.1	0.25885	0.43205	0.0261	0.0605	Ara1	599	1330	592
OG0002554	AT3G63330.1	0.26332	0.24328	(0.0813	0.3346)	variable	1041	1444	1021
OG0004863	AT1G50620.1	0.29402	0.8529	0.0191	0.0224	Ara1	629	695	592
OG0004179	AT3G55690.1	0.42232	0.4437	0.3517	(0.1396	Ara1	293	359	280
OG0016958	AT3G14370.1	0.07779	0.08753	(0.0167	0.1878)	Ara1	480	488	480
OG0006996	AT2G17150.1	0.26895	0.27991	(0.0533	0.1910)	Ara1	909	1018	891
OG0014592	AT1G55880.1	0.18172	0.05425	0.0025	0.0454	all1	421	434	409
OG0006648	AT5G44610.1	0.287	0.28016	G:0.53425	position	Ara1	168	193	146
OG0006718	AT2G43400.1	0.19941	0.04935	0.0028	0.0573	Ara1	633	715	618
OG0016686	AT1G73000.1	0.25785	0.10706	0.003	0.0284	Ara1	209	249	202
OG0009965	AT1G15125.1	0.28562	0.56346	0.006	0.0107	all1	351	418	350
OG0019300	AT4G01037.1	0.10719	0.0833	0.0051	0.061	variable	528	535	525
OG0009835	AT2G27150.1	0.1682	0.22501	0.0091	0.0405	all1	1332	1350	1308
OG0019579	AT4G01050.1	0.21042	0.21253	(0.0542	0.2546)	variable	466	482	444
OG0006031	AT5G19400.1	0.37343	0.23522	0.0101	0.043	Ara1	1059	1079	1009
OG0004275	AT5G08415.1	0.11036	0.0001	0.069474	0.027919	variable	394	556	338
OG0014810	AT4G02370.1	0.21221	0.27746	G:0.28386	0.148023	all1	167	223	163
OG0012527	AT2G30530.1	0.08896	0.20679	A:0.30048	G:0.23865	all1	371	419	345
OG0010763	AT1G15820.1	0.10232	0.28138	A:0.15234	G:0.31641	all1	258	258	256
OG0014940	AT4G28150.1	0.14663	0.20707	(0.0200	0.0964)	all1	285	302	282
OG0012477	AT5G27660.1	0.19786	0.06221	0.121876	0.071365	all1	424	461	422
OG0010633	AT2G20825.1	0.14036	0.53929	0.0166	0.0307	all1	228	247	228
OG0006161	AT4G21530.1	0.19182	0.20583	A:0.32903	G:0.14710	variable	777	1280	775
OG0010216	AT3G12200.1	0.26603	0.28618	0.0058	0.0202	all1	571	802	563
OG0012052	AT1G71940.1	0.06731	0.06207	0.0067	0.1079	all1	272	277	272
OG0004700	AT5G17780.1	0.28889	0.20586	0.0109	0.053	Ara1	417	767	410
OG0006544	AT5G11530.1	0.29429	0.25007	(0.0358	0.1429)	Ara1	1096	1175	1089
OG0004650	AT5G48270.1	0.05885	0.04965	(0.0122	0.2417)	Ara1	322	358	321
OG0000923	AT4G11580.1	0.55181	0.70868	0.052	0.0733	variable	333	428	303
OG0006414	AT1G61240.4	0.1064	0.08573	(0.0150	0.1721)	Ara1	425	461	425
OG0010346	AT3G21110.1	0.13999	0.0001	0.07836	0.025346	all1	411	427	411
OG0012102	AT3G55920.1	0.18745	0.57747	0.0112	0.0195	all1	228	257	198
OG0009192	AT3G28700.1	0.1469	0.10943	0.003	0.0278	all1	471	534	470
OG0012948	AT3G25480.1	0.22825	0.12028	0.2552	(0.1004	all1	264	301	260
OG0009223	AT2G27310.1	0.19501	0.30057	Average	T:0.24224	all1	337	358	333
OG0019916	AT1G05065.1	0.31503	0.3612	0.0342	0.0948	variable	83	104	76
OG0009888	AT1G76390.2	0.12948	0.15038	0.0109	0.0724	all1	811	855	809
OG0009373	AT5G06800.1	0.33331	0.26599	C:0.23955	A:0.32312	all1	375	403	359
OG0009606	AT5G63920.1	0.15178	0.39032	0.0065	0.0166	all1	926	1159	920
OG0002708	AT2G21540.1	0.09657	0.37902	0.0056	0.0147	Ara1	548	568	542
OG0006380	AT3G60250.2	0.06022	0.04816	0.0015	0.0305	Ara1	276	279	276
OG0012696	AT2G23350.1	0.08971	0.10393	0.0055	0.0532	all1	662	672	654
OG0010582	AT5G03380.1	0.15043	0.07042	0.0055	0.0781	all1	392	443	354
OG0004094	AT3G20250.1	0.14669	0.26693	0.0066	0.0246	Ara1	913	990	914
OG0004262	AT5G48040.1	0.19792	0.92579	0.0092	0.0099	Ara1	422	439	406
OG0010774	AT1G53760.1	0.24783	0.75758	0.0149	0.0197	all1	272	304	267
OG0014807	AT2G23890.1	0.0972	0.03301	0.3405)	0.0879	all1	553	557	534
OG0012530	AT1G50420.1	0.08505	0.16391	0.1042	(0.0164	Ara1	482	483	481
OG0010624	AT3G26850.1	0.29794	0.4742	0.0307	0.0648	all1	265	313	265
OG0014957	AT4G12240.1	0.14417	0.28376	G:0.37640	0.110413	all1	364	539	356
OG0012460	AT3G03600.1	0.06833	0.06663	(0.0119	0.1748)	all1	219	239	219
OG0004332	AT3G04030.1	0.20407	0.35052	0.0057	0.0163	Ara1	388	409	384
OG0006176	AT5G02580.1	0.12953	1.8195	0	0	variable	91	91	91
OG0014689	AT4G28050.1	0.06446	0.05343	0.0049	0.091	all1	263	264	263
OG0012045	AT5G56840.1	0.3033	0.05267	0.014107	0.089345	all1	233	293	231
OG0010201	AT1G74840.1	0.21204	0.32373	0.1846	(0.0547	all1	265	275	256
OG0006553	AT3G51880.1	0.13136	0.0001	0.1116)	lnL(ntime:	Ara1	178	202	152
OG0004717	AT2G46550.1	0.25772	0.25568	A:0.35450	G:0.17989	Ara1	397	420	380
OG0006403	AT1G11580.1	0.14192	0.30385	0.1794	(0.0297	Ara1	557	587	547
OG0004647	AT3G09920.1	0.12078	0.11378	(0.0189	0.1656)	Ara1	815	857	815
[truncated: 12,907 more rows]
