# Supplementary material for: A binary interaction map between turnip mosaic virus and Arabidopsis thaliana proteomes
Source: Commun Biol. 2023 Jan 11;6:28. doi: 10.1038/s42003-023-04427-8 (PMC9834402; doi:10.1038/s42003-023-04427-8)
Supplement: Supplementary file 8 — Supplementary Data 5 [file 42003_2023_4427_MOESM8_ESM.xlsx]

## Sheet: oligos
Gene cloning into pGBKT7 vector
	P1	5’- C ATG GAG GCC GAA TTC ATG GCA GTA GTT ACA TTC GCA TCG -3’	F
		5’- G CAG GTC GAC GGA TCC AAA GTG CAC AAT CTT GTG ACT CAT -3’	R
	HCPro	5’- C ATG GAG GCC GAA TTC AGT GCA GCA GGA GCC AAC TTC TGG -3’	F
		5’- G CAG GTC GAC GGA TCC TCC GAC ACG GTA GTG TTT TAA GCT -3’	R
	P3	5’- C ATG GAG GCC GAA TTC GGG ACA GAA TGG GAG GAC ACT CAT -3’	F
		5’- G CAG GTC GAC GGA TCC TTG ATG AAC CAC TGC CTT TTC TTC -3’	R
	P3NPIPO	5’- C ATG GAG GCC GAA TTC GGG ACA GAA TGG GAG GAC ACT CAT -3’	F
		5’- G CAG GTC GAC GGA TCC CCC CAT TCG TAA GAT GAC ATG ACT -3’	R
	6K1	5’- C ATG GAG GCC GAA TTC GCA AAG AGA CAA TCC GAG CAA GAA -3’	F
		5’- G CAG GTC GAC GGA TCC CTG ATG GTA AAC TGT AGG TTC GAC -3’	R
	CI	5’- C ATG GAG GCC GAA TTC ACT CTC AAT GAT ATA GAG GAT GAC -3’	F
		5’- G CAG GTC GAC GGA TCC TTG ATG GTG AAC TGC CTC AAG CGC -3’	R
	6K2	5’- C ATG GAG GCC GAA TTC AAC ATC AGC GAC ATG AGC AAA TTC -3’	F
		5’- G CAG GTC GAC GGA TCC TTC GTG GGT TAC GGG TTC AGA GAT -3’	R
	VPg	5’- C ATG GAG GCC GAA TTC GCG AAA GGC AAG AGG CAA AGA CAG -3’	F
		5’- G CAG GTC GAC GGA TCC CTC GTG GTC CAC TGG GAC GAG TCC -3’	R
	NIaPro	5’- C ATG GAG GCC GAA TTC AGT AAC TCC ATG TTC AGA GGG TTG -3’	F
		5’- G CAG GTC GAC GGA TCC TTG TGC ATA GAC TGC CGT GCT GTC -3’	R
	NIb	5’- C ATG GAG GCC GAA TTC ACC CAG CAG AAT CGG TGG ATG TTC -3’	F
		5’- G CAG GTC GAC GGA TCC CTG GTG ATA AAC ACA AGT CTC AGC -3’	R
	CP	5’- C ATG GAG GCC GAA TTC GCA GGT GAG ACG CCT GAT GCA GGT -3’	F
		5’- G CAG GTC GAC GGA TCC TAA CCC CTT AAC GCC AAG TAA GTT -3’	R
	P3NPIPO (G2A7)	5’- CAT CTC CAT TTT GGA AAA AAA GTT ATC -3’	F
		5’- GAT AAC TTT TTT TCC AAA ATG GAG ATG -3’	R
Gene cloning into pMetYC-gate vector
	P3	5’- T CAG ATA CAT AGA TAC AAT TCT ATT ACC CCC ATC CAT ACA ATG GGG ACA GAA TGG GAG GAC ACT CAT -3’	F
		5’- CC GGC AAA GAT CAA TCT TTG TTG ATC TGG AGG GAT ACC TTG ATG AAC CAC TGC CTT TTC TTC -3’	R
	P3NPIPO	5’- T CAG ATA CAT AGA TAC AAT TCT ATT ACC CCC ATC CAT ACA ATG GGG ACA GAA TGG GAG GAC ACT CAT -3’	F
		5’- CC GGC AAA GAT CAA TCT TTG TTG ATC TGG AGG GAT ACC CCC CAT TCG TAA GAT GAC ATG ACT -3’	R
	6K1	5’- T CAG ATA CAT AGA TAC AAT TCT ATT ACC CCC ATC CAT ACA ATG GCA AAG AGA CAA TCC GAG CAA G -3’	F
		5’- CC GGC AAA GAT CAA TCT TTG TTG ATC TGG AGG GAT ACC CTG ATG GTA AAC TGT AGG TTC -3’	R
	6K2	5’- T CAG ATA CAT AGA TAC AAT TCT ATT ACC CCC ATC CAT ACA ATG AAC ATC AGC GAC ATG AGCA AAT TC -3’	F
		5’- CC GGC AAA GAT CAA TCT TTG TTG ATC TGG AGG GAT ACC TTC GTG GGT TAC GGG TTC AGA GAT -3’	R
Gene cloning into pDONR207 to BiFC assay
	HCPro	5’- G GGG ACA AGT TTG TAC AAA AAA GCA GGC TAT ATG AGT GCA GCA GGA GCC -3’	F
		5’- GGG GAC CAC TTT GTA CAA GAA AGC TGG GTA TCC GAC ACG GTA GTG TTT TAA GC -3’	R
	P3	5’- G GGG ACA AGT TTG TAC AAA AAA GCA GGC TAT ATG GGG ACA GAA TGG GAG GAC AC -3’	F
		5’- GGG GAC CAC TTT GTA CAA GAA AGC TGG GTA TTG ATG AAC CAC TGC CTT TTC -3’	R
	P3NPIPO	5’- G GGG ACA AGT TTG TAC AAA AAA GCA GGC TAT ATG GGG ACA GAA TGG GAG GAC AC -3’	F
		5’- GGG GAC CAC TTT GTA CAA GAA AGC TGG GTA CCC CAT TCG TAA GAT GAC-3’	R
	6K1	5’- G GGG ACA AGT TTG TAC AAA AAA GCA GGC TAT ATG GCA AAG AGA CAA TCC G-3’	F
		5’- GGG GAC CAC TTT GTA CAA GAA AGC TGG GTA CTG ATG GTA AAC TGT AG -3’	R
	CI	5’- G GGG ACA AGT TTG TAC AAA AAA GCA GGC TAT ATG ACT CTC AAT GAT ATA G -3’	F
		5’- GGG GAC CAC TTT GTA CAA GAA AGC TGG GTA TTG ATG GTG AAC TGC -3’	R
	6K2	5’- G GGG ACA AGT TTG TAC AAA AAA GCA GGC TAT ATG AAC ATC AGC GAC ATG AG -3’	F
		5’- GGG GAC CAC TTT GTA CAA GAA AGC TGG GTA TTC GTG GGT TAC GGG -3’	R
	VPg	5’- G GGG ACA AGT TTG TAC AAA AAA GCA GGC TAT ATG GCG AAA GGC AAG AGG CAA AGA CAG -3’	F
		5’- GGG GAC CAC TTT GTA CAA GAA AGC TGG GTA CTC GTG GTC CAC TGG GAC GAG ACC -3’	R
	NIaPro	5’- G GGG ACA AGT TTG TAC AAA AAA GCA GGC TAT ATG AGT AAC TCC ATG TTC AGA GGG TTG C -3’	F
		5’- GGG GAC CAC TTT GTA CAA GAA AGC TGG GTA CGC TGC ATA GAC TGC CGT GCT GTC G -3’	R
	NIb	5’- G GGG ACA AGT TTG TAC AAA AAA GCA GGC TAT ATG ACC CAG CAG AAT CGG TGG ATG -3’	F
		5’- GGG GAC CAC TTT GTA CAA GAA AGC TGG GTA CTG GTG ATA AAC ACA AGT CTC -3’	R
	AT1G11125	5’- G GGG ACA AGT TTG TAC AAA AAA GCA GGC TAT ATG GGT TGT TGC CTC AGC -3’	F
		5’- GGG GAC CAC TTT GTA CAA GAA AGC TGG GTA TCA TAG GAA GAT GAA ACA CTC -3’	R
	eIF iso4E (AT5G35620.1)	5’- G GGG ACA AGT TTG TAC AAA AAA GCA GGC TAT ATG GCG ACC GAT GAT GTG AAC GAG C -3’	F
		5’- GGG GAC CAC TTT GTA CAA GAA AGC TGG GTA GAC AGT GAA CCG GCT TCT TCT G -3’	R
	SGS-domain (AT1G30070.1)	5’- G GGG ACA AGT TTG TAC AAA AAA GCA GGC TAT ATG GCG GAA GAA GTT G -3’	F
		5’- GGG GAC CAC TTT GTA CAA GAA AGC TGG GTA TAG TCC TTT TAA AGG -3’	R
	DHAR3 (AT5G16710.1)	5’- G GGG ACA AGT TTG TAC AAA AAA GCA GGC TAT ATG ATA AGC CTT AGG -3’	F
		5’- GGG GAC CAC TTT GTA CAA GAA AGC TGG GTA ACC CAT AAC CTT TGG -3’	R
	CaLB (AT5G37740.1)	5’- G GGG ACA AGT TTG TAC AAA AAA GCA GGC TAT ATG GAG AAT CTT GTA G -3’	F
		5’- GGG GAC CAC TTT GTA CAA GAA AGC TGG GTA AAT ACC CCT TGA ACC -3’	R
	MBD5 (AT3G46580.1)	5’- G GGG ACA AGT TTG TAC AAA AAA GCA GGC TAT ATG TCG AAC GGC ACG -3’	F
		5’- GGG GAC CAC TTT GTA CAA GAA AGC TGG GTA GAA CAT CGT TTT TC -3’	R
	CLPP4 (AT5G45390.1)	5’- G GGG ACA AGT TTG TAC AAA AAA GCA GGC TAT ATG GGA ACC CTA TCT C -3’	F
		5’- GGG GAC CAC TTT GTA CAA GAA AGC TGG GTA GTA GAT CTC ATC ATC -3’	R
	ATDJ1A (AT3G14990.1)	5’- G GGG ACA AGT TTG TAC AAA AAA GCA GGC TAT ATG GCT TCA TTT ACG AAA AC -3’	F
		5’- GGG GAC CAC TTT GTA CAA GAA AGC TGG GTA CAC AAG TGT TGC CTT TCC -3’	R
	ADR1-L1 (AT4G33300.1)	5’- G GGG ACA AGT TTG TAC AAA AAA GCA GGC TAT ATG GCC ATC ACC G -3’	F
		5’- GGG GAC CAC TTT GTA CAA GAA AGC TGG GTA TTC GTC AAG CCA GTC -3’	R
	HR-like lesion-inducing (AT1G04340.1)	5’- G GGG ACA AGT TTG TAC AAA AAA GCA GGC TAT ATG GGT TTC TTC TC -3’	F
		5’- GGG GAC CAC TTT GTA CAA GAA AGC TGG GTA AGC AGC TTT AGG CTT G -3’	R
	PAL1 (AT2G37040.1)	5’- G GGG ACA AGT TTG TAC AAA AAA GCA GGC TAT ATG GAG ATT AAC GGG G -3’	F
		5’- GGG GAC CAC TTT GTA CAA GAA AGC TGG GTA ACA TAT TGG AAT GGG AG -3’	R
	CaEF (AT2G41410.1)	5’- G GGG ACA AGT TTG TAC AAA AAA GCA GGC TAT ATG AAG CTC GCC GCT AG -3’	F
		5’- GGG GAC CAC TTT GTA CAA GAA AGC TGG GTA ATG ATG ATG ATC ATT C -3’	R
	DPA (AT5G02470.1)	5’- G GGG ACA AGT TTG TAC AAA AAA GCA GGC TAT ATG AGT ATG GAG ATG G-3’	F
		5’- GGG GAC CAC TTT GTA CAA GAA AGC TGG GTA GCG AGT ATC AAT GGA TC -3’	R
	CRF2 (AT4G23750.1)	5’- G GGG ACA AGT TTG TAC AAA AAA GCA GGC TAT ATG GAA GCG GAG AAG -3’	F
		5’- GGG GAC CAC TTT GTA CAA GAA AGC TGG GTA AAC AGC TAA AAG AGG -3’	R
	AO (AT5G14760.1)	5’- G GGG ACA AGT TTG TAC AAA AAA GCA GGC TAT ATG GCG GCT CAT GTT TC -3’	F
		5’- GGG GAC CAC TTT GTA CAA GAA AGC TGG GTA GCA ATC AAT AAG TGA G -3’	R
	LSM1B (AT3G14080.1)	5’- G GGG ACA AGT TTG TAC AAA AAA GCA GGC TAT ATG TCG TGG GCT GGT CC -3’	F
		5’- GGG GAC CAC TTT GTA CAA GAA AGC TGG GTA ATC AAA GTC AAG AAA C -3’	R
	AKR2B (AT2G17390.1)	5’- G GGG ACA AGT TTG TAC AAA AAA GCA GGC TAT ATG GCT TCA AGC TCA GAG -3’	F
		5’- GGG GAC CAC TTT GTA CAA GAA AGC TGG GTA GAG GAA AGC GTC CTT CTC -3’	R
	VPS22 (AT4G27040.4)	5’- G GGG ACA AGT TTG TAC AAA AAA GCA GGC TAT ATG CGA CGA CGA CCA G -3’	F
		5’- GGG GAC CAC TTT GTA CAA GAA AGC TGG GTA AGT ATC AGA TCC GAT G-3’	R
	Rubredoxin-like (AT3G15640.1)	5’- G GGG ACA AGT TTG TAC AAA AAA GCA GGC TAT ATG TGG AGA AGA ATC -3’	F
		5’- GGG GAC CAC TTT GTA CAA GAA AGC TGG GTA GTG GTG GTG CTC ATC -3’	R
The recombination sequence are underlined.
Primers named P3NPIPO (G2A7) were used to add an A nucleotide in the GGAAAAAA motif by site-mutagenesis
